# Supplementary material for: Transcriptional Program Induced by Wnt Protein in Human Fibroblasts Suggests Mechanisms for Cell Cooperativity in Defining Tissue Microenvironments
Source: PLoS One. 2007 Sep 26;2(9):e945. doi: 10.1371/journal.pone.0000945 (PMC1976560; doi:10.1371/journal.pone.0000945)
Supplement: Table S1 — Each oligonucleotide on the microarrays used in this study is represented by a row of data in this table. The oligonucleotides are listed by sequence ID. For each oligonucleotide, the nucleotide sequence, LocusLink ID, genome location, gene name and symbol (and synonyms) are provided in the indicated columns (where applicable). (15.62 MB XLS) [file pone.0000945.s004.xls]

## Sheet: Sheet1
probe sequence	worst xhyb deltaG based on hg16	distance from 3' end (3' margin)
GCACAGTCTGTGATGATGTCACTTCTCTCAAGCCTGATGTGTCCTCTCTCTCTTTCTTGCTAGTGGTTTA	-25.8	527
ACAAGGCCGGGGTCTCTGGGGGGCTGGAGAAGCCTCCCTCATTCCTCCCAGGAATTAATAAATGTGAAGA	-32.6	1692
CTTGGGGAGAAATCTCGTGCCCAAACCTGGTGATGGATCCCTTACTATTTAGAATAAGGAACAAAATAAA	-24.5	316
CTGCCATTCTGGCCTTTCCAGAACATCAATGCGGCCAAATCTAGTTTCCTCCCAGAAGATGAAAAGAGGG	-24.4	695
GCATGTTTATATCTTTCGTTATGGATAAAGTATTTACAAAACAGTGACATTTGATTCAATTGTTGAGCTG	-22.2	317
GACAGCTCCCAAACGGAAGACTACAGCATGACGTAGTATTATGATTGCATTGTATGAAAGAGCAAGTGAC	-20.7	203
GGACCAGATGATGCAAAAGAAATTATGAGACACAGTTTCTTCTCTGGAGTAAACTGGCAAGATGTATATG	-23.3	3968
TACAACAGACAGTGAGTGCTAAAGGCCCCCCTGAAAAACGGATGAGACTTCAGTGAGTACTGGACAAAAG	-22.1	721
TTATCACTGCGGAACGCATCGAGCTCCTCTTTTTCCGCAAGACCATAGGGAATACTCCAATGGAGAAGCT	-22	603
GCTCTTTAAAAGTTAATAATTATATTAGCAAAGTGTTAATCTAATGAAGTAAAAAACTCCTGTGTGGCAG	-20.8	665
CCGCTCACCAGGCCCTGGCGACCTGAGCATCTACGACAACTGGATCCGGTACTTCAACCGCAGCAGCCCG	-26	826
TCTATCCCCATTCCTGAGACAGGAGTTACAGTCCCTTTTGGCCCTCACATCCAATAAAGAGACTGATACC	-24.3	297
GGCACTAGCAACATTAGAATTTTAAAATAAAATAATTGGGAAAGAAGGTGGGTCATGTATTAATCAGTGA	-23.1	728
GTATTGTTTCCCCACTTAAAATAGTCCTGCTTAAATTCACATGGTGTGGTCTGATGTTCTGAGAGCATCA	-22.5	322
CCGCACCGTGTTTGTGTGTGACGAGGATGCCACCTTGGAGCTGAAAGTGAAGACTGTCAAGTATTTCAAA	-27.7	1480
TGATTTTCCCTTTCCGCATGATAAATTTATGTAATATTTGACTGACTTGACCGTAAGTATGTTACTTGTA	-20.3	742
GGCTTTCTGGCTGGTCAACTATATGAAACCTTGTTCATTCCTCCGAGTACTGTAATGTTCACACTTGTAC	-22.3	99
TGCTTAAGTATTTCTTAGTCCAACATAGATATTTTCTTTCTCCTGACCATGTATTTTAAAATATAGTCTA	-22.4	250
CCCTTATTTTTTATTTTCCCTGTTGCGTTGCTATAGATGAAGGGTGAGGACAATCGTGTATATGTACTAG	-23.3	29
TTACAGTGCTATTACTATAATTCAAAATTATGTATGTGACTTAGAGTTATATAATCATAATTTATGTTTA	-20.2	503
GGTTTTCTGTGTAAATCGAAGGAGAAAAAGACCAGATTACTGAGATTGGGGATTGTAACTCTGACTTGCC	-22.7	34
GACTGAGGTCAGTCAGTGGATGGTAGGAGTTAAAAGATTAATTGCAGAAAAGAGGAGTCTGTTTTCAGAG	-24.1	709
TCCCATCCTGAATATCCTTTGCAACTCCCCAAGAGTGCTTATTTAAGTGTTAATACTTTTAAGAGAACTG	-23.2	199
TCGCCAGAAACTTGGTGGAGCGAGCCAAGGGCGGAGTTTGAGAAAGGGGCTGCGTCCAATGAGTGGAGCG	-27.1	565
GCTTTGTCTCCCTGGATATGGATTTCAGTTAAGTATTTTGTAACCCGTTACACTGTGTGTCCTTGTGTAA	-22.8	23
AACACTGGAGCTGTGTGCAGAAGTTCGCCGCTGGTCTGGGCCGGTCCCTGCGAGAGGCCCAAGCAGGTGA	-30.5	1756
GGCATCTCACTTTTTAAAGACGTTTGCAATTATTAGTTGATTCACAGTACAGAACAAGGTATAAAGGAAA	-21.1	487
ATAAGCTGATTAATGGTTTTGCAACTGTAATAGTAGCTGTATCGTTCTAATGCAGACATTGGATTTGGTG	-21	260
TGGGGAAGAATCTGTCATGAATCTTGACAAATTGAGATTTGCTGATGGAAGCATAAGAACATGAGAACTG	-86.1	1005
ACAACAGCCTTCATTTATCTCTGGACACGATTATTATGAGTTTTAAAACTTTTAACCCGCTTCTACCTGC	-23.3	194
AAATCAAGTTTAAAATTCCTTCTGATTAAAAAAATATAGTGGAATACAATTGTCTGCCGTTTCCCCTTCT	-21.4	188
AATTACCAAGCAGCCGAAGACCACCCACGAATGGTTATCTTACGACTGTTACGTTACATTGTCCGCCTGG	-25.5	2792
ACCCCACTGGCTGCAGCTAGCCCACCATAGGCACAGCACATCCCACCACTCTCCTTCCAGTCCTGACCAG	-30.1	700
CTGCGGCTGTGTCCTTAGTGCTGTTAGGAGGCCCCCCAATCCCCACGTTGAGCTGTCTAGCATGAGCACC	-24.7	156
TTTGAACTATATCCTTCCTAGTGGGTTAGTGTGAAAAAGAGTTTGGCTGATTCCTAAAACTCTGCCAGCC	-22.3	387
GCAGCTACAATAATAGAGAGGAAGCCTTCTTAGAACTCTGCTTACTAATGTATTAATACCACTGAGACCT	-22.8	1126
TCAAAGCCAGTCCCAGCCTGACCTCTCACCACACGGAAGTGGAAGACTCCCCTTTCCTAGGGCCTCAAGC	-28.9	10
TGGGTGGCAGAGCTTTATCACATGTTTAATTACAGTGTTTTACTGCCTGGTAGAACACTAATATTGTGTT	-21.3	197
GGAATTGTGGCTATCCTGATTATAGGATTTTAACTTAACTGAAATGCCTGCTTTGAATAAATGTGTTGGG	-22.1	169
CACTCCTGCCCTGCCGTACTTCTTCCTTTTAGCCCTTATTTATTGTCGGTCTGCCCATGGGACTGGGAGC	-26.7	147
CCTTGTGGTGACCCGGCTCGGGCGTCTCCTCGGTTTCCTTGCCTCACCCGCGGAGAGCGCTGAACCTGGA	-24.4	50
AGGCGCTGCAGCAGCTCTTGCAGTGGGTGGGCGACTTCGTGCTGTACCTGCTGGCCAGCCTACCCAACCA	-28.3	1181
CATGTGAAAGAAATACGTTATAAACATACCACAAGATATGGCTATAAAACAATGAGATCAGTATCCATTT	-20	547
ATTTTCTATAATTGTAGTAATTGCTCTACAGATAATGTCTATATATTGGCCAAACTGGTGCATGACAAGT	-22	56
GTGTGCAGAGTTCTATATAGGATGCTGGATTAGTTCCTTTGATATTTGTAAAAATTCCCCCAAGAGCCGC	-25.2	69
TCCCTCTTCCACCAGCTCGCCCGAGGGGCCGCCTGCTCCCCCAAAGCAGCACAGCAGTACCAGTCCCTTC	-31.3	2190
TCAAAGGCCGGCAGCCCCTGAGGTCCGGACCCACGCACGTTTCCACCCGGAATGCAGATATTTTTAACAG	-29.2	1523
GATGCTTCTATGGCATGGTTCCAGGATGAGTAACTGGGTGGGAATCTTGAGCCATGGGCTTCGAATTGCC	-26.8	639
CTGCAAGGCTGGACTGTGATCTTCAATCATCCTGCCCATCTCTGGTACCCCTATATCACTCCTTTTTTTC	-26.4	288
GCAGAGCGGGACCACTTTGTGTCTCACCCGGGCAAGTACACACTTATCGAAGTACAGGCAGAGGATGAGG	-28.6	1543
TGCAGTCATCAGAAATTCCAGCGTACTATAATGAAAACATCCTTGTTTTGAAAACCTAAAAGACAGGCTC	-21.6	212
CGATGACAAAAAGTGATCTCCAGCCACCTAATTACTACGAGGTAATGGAGTTTGATCCCTTAGCTCCTGC	-23.2	791
ATTTAAAATTTGTACACATTTGTATAATAATCTGTACCTTGTGGTATTTGGTACTATTAGAGGAAAAACT	-20.6	353
ACTGGGGCTCACCTCTTGGTTGATCCTCTTGTACTGGGAGAGGTGCCTTTTGTATCCCCAATTAAAGGTA	-26.2	21
GTCTCTGTTCTGTAAATAGATGTACAGAAGCCATGTTATTTCTTTCATATAATAAACTTTTATGACTCTT	-21.1	197
CTGCCCTGTGCCTCACAGAAGAGGTGGGGACCGCAGTCAGGGTCACCTGGACCATGGTGAACATGTGACC	-27.2	261
TGGGGTTTGTCTTTGATGGTTTCTATCTGCAATTATCGTCATGTATATTTAAGTGTCTGTTATAGAAAAC	-23.3	216
ATTAAGCTGCAGCTTTTTGGTAGGAGCACTTCCCTGGAATGGTGAATTCACTGTGATGGAGAAAAAGTGT	-26.4	136
ACCGTGTCTTAATTTAATCTTTGTACACCTTCCATTTTTAAGTGCTTAAATGAGTACTATATTGCAATAA	-20.7	226
GGGGAGAGGAGTGGTATTTGATGCTTTCTGTGGACAATGTAACCCTAAACACATCATGTATTTTAAATGC	-23.8	54
CTCCTTCTGGCCCAACAATAAGTGCCATTTGGAATCTTCTCGGCCTTCTCTGTGCCTTCCGCGCGTCTGG	-25.6	611
CTGGCCAAGAGAGTTTGTACTCATAGCCTTGGAACCTTAATTCGAAATGTACTGAAGAAAAAGTAACAGC	-22.3	3
GCCCCTATATGGGCAGCATGGAGGATCATAAGATAGCAAAACCATTTCAACACTAAATGAATATTAATGT	-24	981
AGGGGTTAATTACTTTAGTAATAAGTGGAAAGTAAGATACCTTGAGTAATGTTTGCCTATAAAATTGTCA	-21	305
CGGATAGACTTATTGGAATTTACAAGACATACAACATAACAAAAAGTGTTGCTGTAAATCCAAAAGAAAT	-21.7	1167
GCTGTCAAACCAGATCAAATCCAGTACACCGAACTGTCCAATGCTAAGATCGCCTACAAGCAAAACAAGG	-21.6	245
AAGTGGGGTCCAAAGCTGGGTCCAACAAAAGCACTGCCAGTAGCAAATCAGGGGATGGGAAGACCTCCGT	-25	1603
GCTGGGAGAGAAACTCTCTGCTTCCCTCGCCCTTGGAGCTTTCCCCATCCCCCTGATTTTATATGAAGAA	-26.7	153
ATACATGAAGATCATTGAGAAAAGTGGTTACCAGGCCCTGCCCTGGGTTCGCTACATCACCCAGAGTGGC	-39	511
GACCAGCAGGTTCTAGATGTAAAGAGCTATGCACGTCTTTTTTCAAAGAGCATCGAGACTTTGAGAGTTC	-22.5	1598
GAAGAATTATTTTTAGCCTAGATCTAACCATTTTCATACTCTTAACTGATTGAAACAGATTCAAAGAAGT	-61.2	231
TGGCTAGAAGAAGAATTATTTTTAGCCTAGATCTAACCATTTTCATACTCTTAACTGATTGAAACAGATT	-62.6	453
TCGGGAGCCTCTTGTCACCTTCTTGGACTTATTCCCCACCTGATACCTTATAGAGAAAAGTGTGAATTCA	-30.5	937
GGAAAAAAGCTGGGTCTCATGTTTGAGACAAGTTCCCAGGTACTATTGAAGTAATAAGAAATATGATAAA	-23.1	328
CCTTTCTCCTCCCCTAGTGTCCTTAAGTCCTCCTCCACAGGGAACATCTATTTGGGCTTTGATGTTTAAT	-27.4	1223
TTGAATGGTCAGCGTTGCATGTCGTGACCAACTAGACATTCTGTCGCCTTAGCATGTTTGCTGAACACCT	-21.7	499
ACGTCAGCGCTGGATACATCTAATGAGAGGGCCATCCAGGCTTCTCTGGCCAAAGTCTGTGCCAACCGCA	-27.3	653
GAGACTTTGTTGACTCAAAACTTGCTAGTTACTGCCTACCTGAGTAGAATCTTATTTATGAACTCCTGTG	-21.5	922
CTCCCCTTAGATACAACCAATGTGGCTATTTGTTTTAGAGGCAAGTTTAGCACCAGTCATCTATAAACTC	-22.5	154
CAGGGCCTTTGTCCGCAAAAGCAGCATTCTTATTATGGATGAGGCAACAGCTTCCATTGACATGGCCACA	-24.3	339
TTAATGAGCATGTAAAGAGTGTATCAAAAATTGATGGGATATTAGTGTTAGGTTTTGCTTAAATGAAAAT	-21.8	399
CCATGAGCATCATGAACTCGTTTGTAAACGACGTGTTTGAGCAGCTGGCGTGTGAGGCTGCCCGGCTGGC	-28.5	247
TGCAGGACCAGCTCCAGGTAGAGAGGCTGCAGCACACATATGTGGAAGCCCTGCATGCCTACGTCTCCAT	-27.2	309
AAAAGGCGCAGTCTCGGTGGGATTGCGTGCAGGAGGGTCGTGGTCTGGCTGTGGCGGAGGAGCATAAGAA	-25.7	1508
CCTGAAGAATGAAGAAGATTAATTTTGGGAGTTCTTTGACGAACTTTGATATGTGGAAAAAGTATTTATA	-72.8	45
GAATGAAGAAGATTAATTTTGGGAGTTCTTTGACGAACTTTGATATGTGGAAAAAGTATTTATAATTTAT	-69.6	39
CTCCCTCAGCGACCAGCTCTCCCTGGAACGGGAGGGACAGGGAATTTTTTCCCCCTCTATGTACAAAAAA	-28	1150
TAGTGCTCCCAATCCTATGGCCATGACTGCTGAACCTGACAGGCGTGTGGGGAGTTCACTGTGACCTAGT	-24.2	117
CGCGGAGGCCGCAGTTGCAAACATGGCTCAGAGCAGAGACGGCGGAAACCCGTTCGCCGAGCCCAGCGAG	-28.9	1337
ACCTTCTCCCTGGAGAGGGCAGAAGAGGTCACACGCAGAGACTGCTACTACATCTTACTCACCTGCCAAG	-26.7	90
GAGTGGGGCACAAGAAAAAATAGTATAGCTGAAATGCATCTGTTAAAAATGTCATGATTGAAAGCAGAAC	-23.5	637
GTGCAACCGCTTTGTAAATTAATATGAAGAAGATATATCCCTAATGAAATAGGAATGACTATTACTGCCA	-21.3	106
CAACAATCTACAACCTTCCACAGCAGCCCAGGCGACACTGAAACCACACTCTTACCTGATGACACCATAA	-99.3	165
GGCACAGAGCTCCACATCCAGAGGCCGGAGATGGTAGCATCCACTGTGTGAGCCAACGGGGGCCTCCCAC	-26.1	316
AAACACAGAGCCCACCACAAGCCTCCGGGGCGGGTCAAGAGGAGACCGAAGTCAGGCCCTGAAGCCGGTC	-27.2	233
ATTCCATCAGACCAAGGCTGCAAGTGGCCCTCCATTCGTGTGTGTATTTAGGGGCTGGGGAGGGGGAGGG	-67.8	329
TCCTGGTCTATGCCGCGGGTGTTTACTCCAACATGGGCAACTACAAGTCCTTTGGTGACACCAAGTTTGT	-23.7	2293
ATGTGTGGCCTTGCCCCCAATTCCATCAGACCAAGGCTGCAAGTGGCCCTCCATTCGTGTGTGTATTTAG	-65.4	330
GGGCACTATGAATTGGAGCACCTGTCTACTCCCAAGTTGAAGGGTTCTTCCCATAGCCCAGACCACCCTG	-24.6	592
GTTTGTTTATTTCTAATAAATTTTAATAAGCGAGTAATTTAACTAGGTCGCCAGAAGACCATTATTTTTG	-19.5	186
AAGAGGTAGGACCAGTGCTTTTTTGTTTCTTTTGTTATTTTTGGTTGGGTGGGTGGGAAGGTCTCTTTAA	-25.3	153
GACTGCCTTCAGGGCATCCGGAGCTTCCTGAGGACACACCAGCAGGTCGCCTCCAGCCTGACCAGCATCG	-27.3	628
TCAGGGTCTGTCCACAGTGGGTCTGTGCCAGGTCTCCCGCCGGTGGAAACTGTTGGCTTCCATGGCAGCA	-25.9	320
GACACACATATGATCTTTCGTGTTTCTGAGCGACTCTACTTTCATTGTTTGCCAGCGTGGCTCGTTGCTG	-23.1	26
GGCTAATTTATTATTTTGTTGCAGTGGGGTTAACTGTAAACTCATGTAAGAGTCTGTGATTTCCTCATTG	-22.8	233
GTTAGTAGGTGTGATATGCAACCTGGTATACAGACATTTGTGCAATTTCATTTCATCAAATTCTATCTGC	-21.3	61
ACAGGCACACTGACCATTCGAGTGTGTGCTTGTGACAGCCAAGGCAACATGCAATCCTGCAGTGCTGAAG	-25.3	1127
CAGTGTAGCTATGGAATTATCTTAGGAACTCAAGCTTCTAAAACTATCCATGTAGTCAAATCTAGGGGAA	-21.1	496
TTTGGTTTGGTTTTTGCCAATTATTTTGTTATATTTCCAAAAAACTAAATAAAAATCATTTTTATTTTTT	-39.4	635
GAGAATTCTTACTCAAATTTTTCGTACCAGGAGATTTTCTTACCTTCATTTGCTTTTATGCTGCAGAAGT	-22.4	236
GAAGATCTCAAGGATCCAGACTCTCATTCCTTTCCTCTGGCCCAGTGAATTTGGTCTCTCCCAGCTCTGG	-25.7	257
GTGGTCAACAGGACTCCCCAAGCGGAATGAGGCCAAGACTGGCGCTGACACCACAGCAGCTGGGCCCCTC	-28.9	139
CGGCTTATTTGTTTATTTTATAAAAAATTTAGCAAAGAAATATTAATATAGTGCTGCATAGTTTGGCCAA	-21	104
AGCAATAAGTTTTTTTCTTCTGTAATGACTCTACGTTATCCTGTTTCCCTGTGCCTACCAAACACTGTCA	-23.8	2329
CAATACTCACCTAATTCTGATAAAAGGAATACTGCAATGTTAGCAATAAGTTTTTTTCTTCTGTAATGAC	-21.1	219
TCTTGAATACTATTCCTGGTTTCTGAAGAATGCAACATATATCTGTCAGAGGGTGAAAAGGGTGTCCCAC	-24.3	261
CAACCGATGTGTCCGTGCCAAAATAAATGTTGCTATGATTTGTCAAACCTTGGTAAGCCCACCAGAGGGA	-23.9	326
CTACAAACAAGCCCAAGGATTTTATCCCAGATTTTCAACCCAAGGATGAGCTGCAATATAACTATCACTG	-23.8	185
CAAGCCCCTGCTTGCTGAAGCGTCAGGTGACCGAGTTCAGCTCCGTAAGGTGGCGGCACCTGAGGAGGAA	-28.8	676
CGTGCCAGATATAACTGTCTTGTTTCAGTGAGAGACGCCCTATTTCTATGTCATTTTTAATGTATCTATT	-20.5	222
CAGGGCCTTAATGTTATTTTGTCCCAGCCAACACCCTCTAGGTCCTAAAAGTCAAGGTACTTCAGTTTAT	-26.4	400
AATAGTAAATAAGACTCTGACTTTACACAAGCTACACATTTTATACTTTTCATAAACCACAAAGTCTCTC	-21	678
ATATAATAGCTGCCTTAGACATTATGAGGTATACAACTAGTATTTAAGATACCATTTAATATGCCCCGTA	-27.4	429
GAGGGAAGTGAGCTTGTGCTTAGTATTTACATTGGATGCCAGTTTTGTAATCACTGACTTATGTGCAAAC	-71.7	723
TTGGGGTGGGCATTTGATGCGGGAGGTGGGTGGTGTGCTTGCTAGCTGGGCAAGAAAGCAGCAGTGGACC	-27.8	716
GCTTCCGCCTACCTCGCCCAGGCTGCCAGACCGGAAGCGCTCCGCTGTACCTGGATCCTGCTCCTCTGGG	-29.2	841
GAAGAGACAGTTCATGAACAAGAGTCTTTCAGGACCTGGACAGTGAAGGGAGCCCGGGCAGCCACCGTCT	-94.8	665
CGGCAAGGCCAAGTGCTCGCAGTTCTGCACCACTGGCATGGATGGCGGCATGAGTATCTGGGATGTGAAG	-27.6	329
ATACTTTTTATACTTTGAGGAAAAAAAGTCAAAGAAAAATTGTATTTGAGGGAAAAAACCATGACCAAGT	-34.6	699
TGGAACTAAGAGCTAGTATCTTGGATTAACTGATGCCTGCTAGTGCTTTCTGATTACTCGCATTCTGTTT	-56.2	487
GGGTTTCTAGAAGACAAGTTTTCAACTGCAGATACAAACATCAGGACGTCAATGTATCTGCTAGGAGACA	-21.7	250
AGTTGTTTTGTTTGTTTTGATTTGAAACCTGGAAATACAGTAAAATTTGACTGTTTAAAATGTTGGCCAA	-33.8	1367
TAGTTGTTTTGTTTGTTTTGATTTGAAACCTGGAAATACAGTAAAATTTGACTGTTTAAAATGTTGGCCA	-32.6	277
GATCATTCCTATAGGCTTCCTATTTTCACTTTACTGCTCTAATGCTGCTAGTCGTAGTCTTTAGCACACT	-56.8	1092
AAAAATAACCAGTATGAAAGTCGTTGCGCCGTGAATCTCTACTGTAGCCATGAATTTATGGACAGTTAGA	-20.8	23
ATGTACATTTTAGGAAACACTTGCAACTCTCATCTGAAGAAGAAAACAACTCATCTTTGGGTTCAGATTT	-22.9	486
GCTTGTTGGAAATAATGTACCCATGTAGACTAGCAAAATAGTATGTAGATGTGATCTCAGTTGTAAATAG	-20.9	374
GAAAGGGCTATGTGGGAGAGTCAGCTATCTTGTCTGGTTTTCTTGAGACCTCAGATGTGTGTTCAGCAGG	-23	123
GATTCCTTTGATTACCTGGTTTCTAGTAAGTTACTAAATTAATCATATTGTCAGTTTTGGTTTATTCTGC	-20.9	695
CAAAAGTGAGTTTAGTTTCCTATCTGAATTAACAACTTTAAAGGAGACTATAATAGTTAAAAGTGGAAGA	-20.5	601
ATTCTGGACGCGACGCCCGCGTGCCTCCCCTGACTAAGGCCACCTTGCAGCCGCTTTCCAGGGCCACCAA	-28.8	726
CTTTTAGCTCTGGACATCATTACAAAAAGGAATATTTCCCAAACCTCTTCAGACCGAGAATGCATGGGTA	-23.1	50
AAGCTGCGGCGGAAAACAGGCTACTCCTTTGTAAATTGCAAGAAAGCTCTGGAGACTTGTGGCGGGGACC	-24.3	1002
TTCTGCTCCAGACTTGGGGCTAGATAGGGACCACTCCTTTTAGGCGATGCCTGACTTTCCTTCCATTGGT	-24.4	228
TGGTCTATGTTGCTGACCTTGTCCTGTCCTCCTGCTGTCTTAAACTATGATCCCTGCTGCGGTCACTGAA	-29.5	581
CCTGGTAGGCTTTGATTTTTCTGTGTGTTAAAGAAATTCAATCTACTCATGATGTGTTATGCATAAAACA	-23.2	675
TTGTGGATCAGCTAAGCTCGGGATCATTTCCATAAGTCTGCTTTTCAGGGATTCTCTGCTGGTGCTGGTG	-26.3	2718
TTATATTTTTGGAATATTTGTATTACTTACAATTAATTAATAAAAGTGGGTTTAAAAAACCTTTCCAGGA	-46.9	36
GGTTTTCTCCCTGCCCGGGAAGAGGACAGATAACTGATTTCCGTTCTTTTGACTGTGTTTTAAAATTCTC	-34.6	2883
TATGAAGATCCTGGCTTGCAGCTCGGGAGCTTTACACACCTTGTGTCACTTTATCTTGGTAACGAGCCAA	-26.2	290
TACAAATGGCAGAACTCACCAGACAACCCCCAGCGTTTTGACCGGGCCACCTGTGTTCTGGCCCACACTG	-28.7	2392
ATGCCAGTGCTCGAGACAACACCATCAACCTGATCCACACGTTCCGGGACTACCTGCACTACCACATCAA	-23.6	570
AGAGGGCCTCCTGGTGTTTGGATTTTGATCTCAATGTGTAAAATGACAGAGATGTAACAAGCTCATAGGG	-25.6	584
TGACATCTTGAATCCTTCCATTCCACACAGAATGCAACCAAGTCACACGCTTTTGAATTATGCTTTGTAG	-24.2	514
CCTGGGATTCAATGTTCATTAAAAATATCCAAGATTTAAATGCCATAGAAATGTAGGTCCTCAGAAAGTG	-21.8	1489
GAAGAAATAGGTCTCTTTTATGCTTTACCATATATCAGGAATTATATCCAGGATGCAATACTCAGACACT	-21.6	146
CTTATGCCCGGATCCTACGCTCACGGCGTTCCCCTTTACTCAAATCTGGGCCTTTTGGCAAAAAGTACTA	-37.6	506
GCACTAAGCCAGCTGGCCTAAAGATGCAATAAGTTCCTAGGTAGTCTACCCTTACCTTGAGGAATGGGAA	-22.8	70
CCACCACATTCTTACATTGCAGCATCACCTGCATATACTGGATTTCCACTGAGTCCAACAAAACTCAGCC	-24.5	781
TTGAGTTTGACATGTAGAGTCATTTTTAGTTTCATGGCAATTGACAGTCCTAATAACTCAGCTAATTTGA	-22.6	660
TCAATTCATTTTTTAATGACTTTCAACACTCCCATGAAAACACCGTAGTCTGCTTTTCCTGAAAGGTGAC	-22.4	242
AACCATAAATGAATCATCAAAGCTCACACCAAATTTTTCTATCAAATAAAACTAGTGACAGCTTGTGGCT	-21.7	335
CTCCCTCTCTCAGATATGTACAATAATTTAACACGGTTGCCTGAAAAAAACTTTTGTAAATCATTATAGT	-20.4	20
CCAGGTGTGGGTCCACAGCAGCAGGTATGTGTGAAAGCAACGTAGCGCCCCGCGGACTGCAGTGCGCTTA	-34.1	126
CAGGTGTGGGCCACAGCAGCAGGTATGTGTGAAAGCAACGTAGCGCCCCGCGGACTGCAGTGCGCTTAAC	-37.1	439
AGGCCAGTTCTGTTTCAGAGCAATTATCTTCCCAAATTCTCTGTTCTGGTGTTGGAACTGTGTGCCCTGG	-24.3	136
CCTGGAATCAGACATCTTCCAGATGGTTTGGACCCTGTCCATGTGTAGGTCATTATCACACAAAGAGACC	-26.1	2129
TGTGTAAAAACAATTGACCAGCTAGGCTATTTAGTCCCATAGTAGTTCAGATCTGCTTAGATGTGACAGG	-22.2	321
ACAGGTATCAGCGCGCCTCCCCAGCGGCTGGGAGAGACGCTGAATGAAGAAGAGGGAAGGACGGTTAGTC	-80.2	1032
CCCAGTTAGTTTTTATATAAATAATCTATAGGGATTCAAAAGGTGTCACAGTCCACTTAATTAGTCAAAT	-20.6	550
AAGGGTTTTAGTAGAAGGGTGAATCGTATTTTACACAGCGGTCTTATTTATATAAATGTCTTGGTTTTTA	-21.7	242
CCTAGGGGGAAATTGGGGATTGTGTCTTTCCCTGTTGAAAATGTTTGGATGGGAATAAATATCTTCAGGA	-24.5	430
GTTTTGTATATATTTGTGATTCTGTGTCTACATGTTATTTTGAAGTATATCTGAGGGAAAAATAAATGAA	-22.6	766
TATGAGTTGTTACTTTGTTTCTTCGATGTCATATTTTATGTGTAATATATATGTAAAGGGCCATTCTTAA	-20.1	210
CCCACCTTTGCCTCCTACCAGTGAACCTCATCTTTGTATGAAAGACAGCAACCTCCTGGGTAAATCTGAA	-25.6	48
ATTATTAAGGAATCTAGCTGGTTATACAGTTCAAGGCTTTCTATGTTGTTAATGAACCTCAAAATAGCCG	-21.5	172
CCTGCCATGGTCACCGTGCTGGAGATGGGGGCTGCCCGCCACTTCCTGCGCATGCAGCAGCTGGCCAAGA	-27.9	318
TGTGGTAACGAAGTACAGCAACTTCGTCAGCTTCCCCTTGTACTTGAATGGAAGGCGGATGAACACCTTG	-24.8	1375
GCCTGACATAGACACGTTACAGATTCACGTGATGGATTGCATCATTTAAGTGTTGATGTATCACCTCCCC	-21.6	1400
GGTGGAGTTGTTAGTGTCCTATGGCAACACCTTCTTTGTGGTTCTCATTGTCATCCTTGTGCTGTTGGTC	-24.2	993
GAGTCTGCAGTGGACTGCAGTTGCCACCTTCCTCTATGCGGAGGTCTTTGTTGTGTTGCTTCTCTGCATT	-26	1213
AATCATTCTACATTAAAGAAAATAATGGTTCTTACTGGAATGTCTAGGCACTGTACAGTTATTATATATC	-80.5	183
GGCAGAAGCCGAGTTCAACATCCTCCTGGCCACCGACTCCTACAAGGTTACTCACTATAAACAATATCCA	-30.5	2268
TCCTCCGGCCCGAGATGAATCCTGCGGCAGAAGCCGAGTTCAACATCCTCCTGGCCACCGACTCCTACAA	-25.6	3984
TTCACTCGAGTCTCCGCCTTCATCGACTGGATTGAGGAGACCATAGCAAGCCACTAGAACCAAGGCCCAG	-48.9	82
AGATGCCGTCCAGCTCGCCTCACTCCCTCCCGCTGGTGACATCCTTCCCAACAAGACACCCTGCTACATC	-88.9	401
TAAGAACACTCGGGAAATGAGTAAAGAAAATGTAAAATTGCTGCTAGTCAAATCTTTTGGAAAGAATTTC	-22.6	244
AAATAGAAGTTGGCTACTCTCAGAATTTGGTTTAAAGCTGGACAGATTTGCTTTGTTATAGGGTAAAGCT	-22.7	3117
TATTTTCTCCAATTTCTTAGTCACTTCTGTCCTACCATGCAAATACACAGATTATGCCAAGAGGTACCAC	-22.6	163
AAGATGCTAGTTGTGAAATACAATTAATTGCATACAGTAAAAGTCTGTGATTAAAACATTTATATACCTC	-21.3	195
GTCCTCCCTGCACGGACCCCACTGGGCCTGCCGAGTGCTGTGTTCTTCCTCAGTCTGGCTGTGGGCAGGA	-28.8	914
CGTCAGGCGCCGCGCGGGGTTAGCGCGGGGTCAGCGGAGGTCAGCGGGGGTCAGCAGCAGCGGCTCCGAG	-31.2	1610
CTTTATGGACTGCCCATGGGAGTGCTCCAAATGTCAGGGTGTTTGCCCAATAATAAAGCCCCAGAGAACT	-26.3	60
GAGTCAGTGTCTTACATGTTAAGAGGGACTGAAATAGTTTATATTAAGTTTGTATTAAAATTCTTTAAAA	-20.6	7
CCAGTGGTTCCTCTTGAGTTTGATTTGACAAGATGCCTTCCCACCCAGGTAACCCCGTGGGAACGTGCCA	-26.6	189
TGATGAAGACAGATAATATCACTTGTAGAGACCTATTTTTGTATAATGGTAGAAGTTTTGAATTTTATGG	-20.7	59
CTTTTGGCTGGGCATCAATGACATGGTCACGGAAGGCAAGTTTGTTGACGTCAACGGAATCGCTATCTCC	-24.3	144
CTTGTTTAACTAGATTGTACAAAATAACTTCATTGCTTAATATCAAATTACAAAGTTTAGACTTGGAGGG	-21.2	208
AAAAATCTGCACTAAAATCCCCAAACTGACAGGTAAATGTAGCCCTCAGAGCTCAGCCCAAGGCAGAATC	-30.3	1509
TAAGAACTCCCTGCCCATCCTTTTAACAAGAGGCTTAGAAAGAGACATGCCAAAACCACCTCCAAAAACC	-27.3	774
ATTCCTAATCATAGCCCGTAAGAAGGAATGTTACTTTAATATTGGACTTTGCTCATGTGCTCGTGTCCGC	-37.4	157
GCACGCGTGTGTGCGGACGCAGTTGCGTGAGGGGTTTGTACTATCCTCGGTGCTGTGGTGCAGAGCTAGT	-29.9	2756
TTTTTTAAGATCTAAGAAGTTGTGAATGTTGTTAATCATTTAGCCGTTGCAATAAATGTAGAGGAAATGC	-22.5	23
AGGAGCACAAAGAAGACACATTCGATGTGTTCCGACAGAGGATGATGCAGATGTACAGACACAAGCGGGC	-23.8	2483
AGGGCTTCCCGCTGCCTCCAGACAGCACCTGGGTCCTCGCCACCCTAAGCCCCGGGACACCTGTTGGAGG	-28.4	594
GTCTTTGCAATATTTCTTTTCTGATTTATTTAATTTTCTTGTATTTATATGTTAAAATCAAAAATGTTAA	-21.4	331
TATTTAACATGTGGAAGAAAACAAGACATGAAAAGAGTGGTGACAAATCAAGAATAAACACTGGTTGTAG	-22.1	49
CTGTAACACTTAAAGAATTCCCTCATTCATTACCTTACAGTGTAAACAGGAGTCTAATTTGTATCAATAC	-21.8	228
GTTATTTGCATTAGTTTACATTTTTTGATACAACTTTTCAGACCAAGAGAATAAAAATCATGCGTTATTA	-23.3	730
TCAGGAAGGAGCCATTATTTATGTCATCAAGAAGAATGACGATGGTTGGTATGAGGGAGTTATGAATGGA	-22.7	313
CTCAAACAGCTTAGATGGGAGGCTGAACGTGATGACTGGCTACACAACAGAGATGCAAAAAGTATCATCA	-25.1	528
AAATGGCTGCTTGAGCTACTCTGTGTCGTTAATTTGTTGTTTGCACATAGGTTCCACTTTGGGCACTGTC	-23.4	43
AGCGCTTCTTCGAGACGCGCATGAACGAGGCCTTCGGTGACACCAAGTTCTCTGCTGTGCTGGTGGAGCC	-28.2	265
GGCTCATTATCCTGCATAGTCTATCTTTGTATATCTTTGAACTTTTCAAGAATAAAAAAGCTTAAAAAGT	-90.2	2
TTCTGCCAACCCCCTGAACAGAAGCATGGGTCCCCCTGATCACCACCTCACCACCCTCATCCTGATCTCA	-103	1046
CTACCCTGTATTTTATAAATACGTATGTGAAAGTGATGATCATGCTATTTGTTAATTTATTGTGCCACTT	-21.4	596
AAGAGCCTTCTGGAGAGGACAGTCAGCTGAGCACCTCCCATCCTGCTCACACGTCCTTCCCCATAACTAT	-25.7	371
AAGTGGAAGTGGGTGAATTCTACTTTTTATGTTGGAGTGGACCAATGTCTATCAAGAGTGACAAATAAAG	-23.8	15
CTGTCTCGTCATAAGCATCTAGCCAAGGATCATTCTCCTGATTTATATTCACTGGAGCTGGCAGGTTTGG	-90	1304
CAGAGGCCTTTGACATCACAGCCTTGAGGAATCCTTCTGCTGCTGAGGAGCTCAAGTACCGGAGGGATAT	-25.9	729
GCTGCTTTCCTGGAAGACGTTTCCTTTCTTCTGTATTAATGAAGCCTGGTAAAATTAACACCTGTCTGAA	-23.3	159
AAACAGCAACGGGTGGCAGAAGCTGTGGGTGGTGTTCACAAACTTCTGCCTGTTCTTCTACAAATCACAC	-29.6	494
GAAAATTTGTATTCAATGTGTTAAGCATTAACATGTATTTTATTTGTGTATCCACTCCATCTGATTTTTC	-22.3	720
AGGGGTGCAAGGCCCTGCCTGCTCCACTTTTTCTACCTTGGAACTGTATTAGATAAAATCACTTCTGTTT	-30.1	13
TAATGGCGGACACAGGCAGGGCGAGCGCGGCTGGGGGCGTAGCGCGCTGAGGGGGTCCGGCCGTTTGGCA	-30.9	4189
GAGAGCAACAGCACAGCTCTGCCTGACGCTCTCATTAAAATCTATGCAGCCAAGCTCGGCACTTTGTAGC	-72	88
GACAGCATGCCGTCTTGCTGTGGCCACTCCCAAGTGTGCCCTCTTCCCTCTTTACACATCAGGTGTCTCT	-61.2	722
GGAAGTGGGAACAAGGTTGGATGCCTACTTATGAGCTTGACCATCACAGCTATCGGTAATCAGAAATATG	-21.8	275
GTACCAAGACTACTAGGGAAATGCCTTTGTACTTTAGGGAAGTACTTTTGGCATTTTACTGTACAGACAG	-24.7	303
CTACATTTGCAGGGATTGAAAACAAATTTGGACTTTACCTACCTCTCTTCAAGCCATCAGTATCTACCTC	-24	258
CTAGATATGTTCAATAGAAAGAGTCTGAGGCAAGTGGAAATGAGGAACGGAAACTTAGGTTGGGAGAATA	-24.4	126
AAAACCTGAACAGACAGTATGATCCAGAATGTCAGGTGTGGAGTTGGGCGGACAAGAGTCTGCTGATGAG	-23.4	246
CGGTTCAGCTATTTCTGAAAGTTTAATAGGTACTGAAGGAAAGAAGTTTTATAAATGTGATATGTGTTGT	-22.3	4984
GAGGAAAGGAACGACTGTGCTACGTTGCCAGAAGGGGCGGGACCTGCAACGTCCGACAGAACGAGGGGAC	-28.5	502
CCGCCAGAAGAATATGAAAAAGCAGAGCGACTCGGTTAAGGGAAAGCGCCGAGATGACGGGCTTTCTGCT	-51.4	354
GCGGGGGCTAAGTTGGTGCTTTTGAGAACCAAGTAAAACAAAACCACTGGGAGGAGTCTATTTTAAAGAA	-24.7	676
GCCTTGCAATCGTTGGAGGGGGCTATACTCCATCCAAATATGCAGTGGAAGGTTTCAATGACAGCTTAAG	-21.9	935
ACACCAATGGGACCAAGTCCAAATGGATTAATCCAGGACAGAATAGCCACTTGCTTAATTTTCTGTGAAG	-21.7	662
CTACCCTCTCGCAGAGAGTGGTTCCCATTTGCCAGAGCTCATTTATTGTCCTGAAGGTCTGTGAAAAGAT	-24.5	443
CTCCTAAAACATCAGAACGTTCACAAGGGATAAAGGTTAGGTAACACACATAGGGCTGTTACGGACTGAG	-21.9	350
AGCTCTCCGCTTTGCCCCCACGGGGTTCCTCTAACCAGAACCAGCTTCCTAGCCTCGTAGAGACCAAAGG	-27.6	722
CTCATCTGTCATGTCGATGATTATATATGGATACATTTACAAAAATAAAAAGCGGGAATTTTCCCTTCGC	-21.5	674
GCGGGTACAAGGTTACGATGGGTATTTTGTTTTGTCTGTTGAGCAGTATTTAGAACTTTCTGACAGTGCC	-21.8	102
TTGAAAGAGTTTAATCTTAACGTTTTCTAATTTTAAAATTTTAAAATCTTGTTTAACAAAAGCTTGTATT	-57.8	233
GCCTCCTACCCATTGCCAAGAGAGGATGCATCTGGGGAGAGCAAAGCACTAAGGAATTCAGCATCAGCCT	-26.2	500
CCAGCAAAAGACAGTCCAACGAGACTTACCGAGATGCTGTTCGAAGAGTCATGTTTGCTCGATATAAAGA	-21.9	225
TATACTCCAGTGTACATAGTGTAATGTAGCGTGTTTACATGTGTAGCCTATGTTGTGGTCCATCAGCCCC	-21.8	493
CTATTTCGGGCTCTTCCACTACTGCATCGGCAACGGCTTCTCCCGGGAGCTGACCTGCAGGGGCAGCTTC	-30.1	36
GTCTTTCATGTGAAATGTGAAGCTGCCATGTTGCCTTTTCTCTTAGTAGGATAACTAGTAGCTGGTACAT	-25.2	512
AATACATTGTCTAGCATTGATTTGGTTCCTGTGCATATGTATTTTCACTATGTGCTCCCCTCCCCAGATC	-48.1	47
AAATGGACCAATAAGCCAAACTATCAGTATTTTGTATATCCTGCATAAACTCTAATTTAGTTCCTCAACA	-21.8	325
ACTCAGCTTTGAATGAGACGCAGGGAGAGGGGGCGCGAGGGGGCTCGGGGCTAGGGGAGGAGCCGCGAAA	-22.4	899
CCCACGCGGTTCCATGTTTTCCCACCAGCCTGTTGGGCGAAGTTGCTGCTCCGGCATTCAGTCCTGCTTC	-25.5	43
CAGAGGAGCTGGATGCCCAGCTGGACGCCTATAATGCGAGAATGGACACCAGTTAAACAGACCAGCAAAT	-63.2	273
GCTGTGCGGCCAATGATGGATTTGTTTCTTTTATGTTTTAAAATAGGATTTAAAAACTCATGTAAAGGTT	-94.5	169
AGGCTATGGAGGGTCCTCCTCCATCTTTCTACAGAGATTACTTTGCTGCCTTAATGACATTCCCCTCCCA	-24.6	181
AGCTGCTCCGGACCGAGCTCGGGTGTATGGGGCCGTAGGAACCGGCTCCGGGGCCCCGATAACGGGCCGC	-31.5	1294
ACATCTTTATACCATTTACAATTGTGTTTTAGATCTACAGAGTTAGAAATTCGAAAACTATTCCAGGACT	-20.3	565
GCTGGGTTCTAAGCTTCACCATGCAAATCAGAAATTTTATCTCTAAGTACAGGCTGTGCCGTGTCTCACC	-24.2	698
GATAAAAAGACATCCTAAAATGGTGAAGTTGCCATGACAATAAAGGTCATAGAACCTGGTAGTGTCAAAT	-21.8	696
TGCGGCTCTTCAATGACCCAGTGGCCATGGTGCTGCTCTTCCTCAGTATCAACCTCCTGCTGGCCCAGCG	-28.4	1195
CTGAGGAGGAGTTTTTAATTGTATTTGCTAGAAAATCAGGATGTAATAAAGATTTGTATAAAAAAACTAA	-21.5	551
CTCACCCTATCACCCATGGATCGTAATGTAAAATTCTTTTACCATGTCAAGAAATTATTAAAAATACAGG	-22.4	536
AAAAGCATTATTTTTAAATAGTATCTGTCTCCAATTTATATCAAGAATAAGGAAATATAAACAGAGGAAG	-20.2	421
AGAGACAAAAGAGACTTAATTCGGCCTCACAGAGATCATCATCTTTACCACCTTCAAATCGTAAATCAAG	-24	1599
CAGGATATTTCTGTTCATAAATTAAAGCTGTAATATATTTTGAATATAATGTAAATATTAATGTGTAAGC	-19.7	172
TCACTTGCCAATGTACATACCTTGTTATATGCAGACATGTATTTCTTACGTACACTGTACTTCTGTGTGC	-21.7	176
CCGGGGTGGGGTGCCTGAGCCCGAATTTCTCACTCCCTTTGTGGACTTTATTTAATTTCATAAATTGGCT	-32.5	126
TTAAATTGCCCTTATGTTTATATTTATTATGTCAAGCCAATTCGTACATACAATTTGGAATCAAATGTCA	-19.6	159
GGACTTCTGAGAACTACTGATTTAATTTCGCTCCCAGGAAGTGAATGAGGTACATGTCTCCTCTCTCCTC	-23.9	342
GAAGACCAGTGGTAGTGCCCAGACTTCTCCTAGACATCTAGTCTAAAACATTCTCCTAGGACCAGGGAAG	-23.4	815
TGGTGTGCAGCGCAGGGGTCAACCCTCTGGTAGGGAGCACTCTGGGGACCAGTGAGCAGATCTGGGACAA	-30.1	949
ACAGGATGTATAATATGCAATCCTACTTCTATATCATTAGGAAAACATCTTAGTTGATGCTACAAAACAC	-19.4	349
CATTGATTTGTTCAGATGTTTCAATGCCTCATGATACAATAAAACCACAAAAATTTTCTTAACAAAAAAA	-67.4	2
ATTGACGCGTCATGCCTTACGTGGGAAGGACAACAGTTCCAGGGGAAAGCTGCCATTGTGGAGAAGTTGT	-102.2	1017
GACAGTTTTTCCGGCAAAATTTGTAGCTTATGTCTTGGCTAAATAGTCAAGGGGTAATATGGGCCTGTTG	-20.2	233
ATCTGGCGCTTGGGGGTAAGTGGAATGATTTGCTAATATTGAGAATCTGTTGTATCAAACATAATAAACT	-20.3	35
GAAAGATTCAAGAATTTTACTTTGGTGGTACTGAACAATGTGGCAGAATTTGTGTGCAAATATAAACTAT	-23	5308
AACCTTTGGATGGGCTGTCTCACGCGGATGTGGTTAATCTGCTGAAGAACGCCTACGGGCGCATTATCCT	-24	139
ATGAGGCACACTACCGGGATGAGGAGAACTTGGAGATTTTCCCTGTGGATCTGCAGAAGAAAGCTGGCCG	-24	4136
TAGACCTACCTCATTTCGATGAATATCTGTTTGAGAATTATTGAATTAATGCTTGTTAACTTTTTTCATA	-21.2	167
TAGATCCCCTGGTGTCTCCAACCTGACTAGGTGGACAGAGCTCAAAGAGGCCCTCTTACCGCTAGCGAGG	-27.1	316
TACTGTAATTGAGCATCCGGAATATGGAGAAGTAATTCAGCTACAGGGTGACCAACGCAAGAACATATGC	-69.8	1203
CTTTTTTACTTTAATGTAAAATGAGTATAACTGTAGTGAGTAAAATTCATTAAATTCCAAGTTTTAGCAG	-20.6	20
TCCCCCTCAGCAAGCCCTACAGAGCTGTGGAGGATTGCTATCTGGAGGCCTTCCAGCTGCTGTCTTCTGG	-26.9	623
TCTGCCAAAATAAAAATTTACTATTTCCTTTATATACTTGTTTATCTGGACTGCCAGTAAAACAAATGTG	-20.8	290
AGATGGCCAAGAAGGCAGAAGCCTTCCAGCTGTACCAAGAGGCTGCTCAGCTGGACATGCTGCTAGAGAA	-27.6	610
TTCACCTCCCCTTTCCAGGCGCCACTGTTGAGAAGCTAGAGATTGTATGAGAATAAACTTGTTATTATGG	-26.3	470
ACGAAAAACGCTATTAATGATGCCTTCAGTGTATATTCCTCTGTTGTTCCTAATGCTCAAAATCAAGGGA	-22.8	543
CTCATCCGATTCCCCTGTAGCAGTCACTGACAGTAAATAAACCTTTGCAAACGTTAAAAAAAAAAAAAAA	-72.2	2
GACTGCGTGAGAGAAAGCAGCTGGTGATTTATGAAGAGATCAGCGATCCTGAGGAAGATGATGAGTAACT	-89.9	699
CCCTTCCTCTGATCGCACCGCCCCTCGCAGAGAGTGTATCATCTGTTTTATTTTTGTAAAAACAAAGTGC	-20.9	338
CAAAGGAGGAGTCAACTAATGAAGAAATGAATAATAAATTTTGACACTGAAAAACATTTTATTAATAAAG	-21.7	732
GCTGGTGTCTGGGTAGTCATGGATTTCTGCTGACATTTGAATGTGATAAACAATCCAGCATTACTTAGGA	-23.2	100
AGCTGAAAGTGAGGATACTCCGTGCTCCAGGCCACAGGGTGAATGTGGCCATGCCTACCTGTTTTGTTTT	-30.7	3451
GGTGACGGTGCTTGACTATGGAAAGAAATGTGTGGTCATTGATTTAGATGAAACATTGGTGCACAGTTCG	-22.8	879
GGGAAATGGTATTTCTATTTTTAAATCCAGTGAAATTATCTTGAGTCTACACATTATTTTTAAAACACAA	-21.4	501
AGCCTGCTCCAAGTTTTCCTCAGTGAGGCCTTTTGCTGGATTGGTCTGAGGAACAATTCTGGCTGGAGGT	-24.8	906
CCAAAGTGAGAAAAGTTCAATACTCTTGAAATGTAGAATTGAAAATGCATTAGGGAAAACTTAATAAAAA	-21.4	30
CATCACACATCAAAGCCTACATGTTGATGACTCTTCAAGGATTAGAATATTTACATCAACATTGGATCCT	-78.3	940
CACAGAGCAACTGGGGCATCGAGATCAACGCCTTTGATCCCAGTGGCACAGACCTGGCTGTCACCTCCCT	-28	804
CTGTCGCACTAACGCTCTCGTGGTTGCTCGACTGTTGTATCTGTGATACATTATCCGACTAAGGACTCTG	-20.8	195
CCTTCTCTGGTCTCCTTGAGATGATCGTAGACACAGGGATGATTCCCACCCAAACCCACGTATTCATTCA	-23.9	486
AATTGTCAGCCTATCAACATAGTGTAGTCAGCCAGAACATTAAAGTTTCTTTGTTTCAACTCTCAAAAAA	-80.8	67
AGTTCCTTGCATAGACATAAAAAGACTCACTGGAAAAAAACTCACACTGGAGAGAACCCATATGAATGTA	-79.3	511
AGCTCAACAACTAGAAAAATAAACTGTTTACCTGCCTTAATTATTTATCTTTAGTTCCTTATTAGTTCTC	-21.2	120
GCCTGTTCTGAGCCTCACCCTATCAGTCAGTAGAGAGAGATGTCCAGAAAAAATATCTTTCAGGAAAGTT	-25.6	583
GGGCTTCTGTTTGTTTTTTAAACTATGCACCAGGTTTCTGATGATGAAATAAAGCACCTGTTTGTTTTAT	-23.8	671
GAGCACTGGAACAACAGATAAATATGGGCGTCTGGACCGAGAGCTCCAGAGAGCCAATTCTCATTTCATT	-29.4	927
CTCTCTTTTCCTCAACCGAGAGTGAATTTATGTAATTGAGTGAAAGTCTACGAATCATAATTGTAATAAA	-20.8	411
TAGTATTAAAATAAAATACCTGGATGAGGAAGATGAAGAGGTGCTGGAAGCCCAGGAAGCACACATCAAG	-34	1114
GCATCTCCTGGAAGCTTAACTTCTTATCCATCCCATCTCTTGGACAGATGATGCCAGTTAATTACTTTGA	-98.8	488
CTTAGTAAAAGTTGAAATGACCATTCTGTGTAGTCATAAAAGAAACACAATGAAGTGTATGGCCTCTGGA	-22	608
ATCCCAAGGCCCGCCTTGCTTTCCAGAACATGAACGGGTCCGAATACTTCGTGAAGATCCAGTCCTTCCT	-28.3	586
GTAGGAGTGGTTGGAGAGACTTGCGAAGGCGGCTGGGGTGTTCGGATTTCCAATAAAGAAACAGAGTGAT	-25.2	13
CTATGAAGAATGCCCCAAAGACAAGTTACCAGCATATCCTGAGTCATTTGACCAAGACACAGAAGATGAT	-22.6	484
TCCGTGAGGAGGAGGTACAGACGGTGGAGGATGGGGTGTTTGACATCCACTTGTAATAGATGCTGTGGTT	-25.3	213
CTGGTGTCCCTAAGGTTGTACAGACTCTTGTGAATATTTGTATTTTCCAGATGGAATAAAAAGGCCCGTG	-40	271
GGGATTACAATGCTTTTATCGTTTCAGGCTTCATTTTAGCTTCAAAACAAGCTGGGCACACTGTTAAATC	-34.7	376
TTATTACTACCACCCTCCTCCTCGCATGCCACCTCCAATTAGAGGTCGGGGTCGTGGTGGGGGGAGAGGT	-31.9	785
TTAAGTTATTATCTCAAACAGTGACATCTCTTGGGAAAATGGACTTAATAGGAATATGGGACTGAGTTCC	-22.5	544
CGGGTTCCCTGCACACCTGTCGCCAGGTTAAACAACCATCGAGCATGTGTCAATGGCATTGCTTGGGCCC	-24.9	755
CCTGTGGAAGAGGGAAGTGTAGGTGAATAGATATCAAAACCCCTGATGTCATTCTTTTGAGGGGTTGGAT	-23.6	112
AAGCGAATTACCTCAGAACAGGCTATGCAGGACCCCTATTTCTTAGAAGACCCACTTCCTACATCAGACG	-28.2	713
CCACCACTTTTCACAGATTGGGGTAGTGGCTTCCAAGTTGTACCTATTTTGGAGTTAGACTTGAAAAGAA	-55.9	603
CTAAAAGAAAGTAACATACAGTTCAATTAAGACCATGGAAATTTTTATTTCAAACAATTAGAGATGGATA	-21.9	422
CTTTTGCTGTCTTAAGAATAAGACCTGAGATTAACACTAACCCTAGAATAGAAATGTAATAGGGAGATGG	-21.1	39
TTTCTGAGTAGGTGAGTTTTGAATATGGGTAAATCAGAATAATGAGACAACTTGTTAATCTCTTTAATAC	-20.4	1054
CATCTATCTTTCTCATCTATATTTAAGTACCTTTTTGTAATGTAGTATCAAAGTTTTTTAGGTAATGCAA	-20.7	197
TAAAATCAAAGACTGATCTTGTACAGATATTAGTGTTACCAGCATTCATGTGGAAATCAAGAGCAAAGAC	-21.8	477
GCTGAGAAAGAGGATTCAGCTGACAAAGTAATGAGCCACAGTGGTGACTCACATGAGGAAAGCCAGACTG	-23.7	261
GTCCCGCCCACGTGAAGCCAGCCTAACTGAGCTCTGGACTTTGGGGACAGCTGTCAGTGGCCTAGGCCGC	-28.8	1399
TTCCTCCAGCTCCAAAAGAGTGCACCCACCCCAACGTTACCAATACACTCGTGCAGGCGGAAAGCTCCGA	-25.9	869
ATGGGAGCTACTTCTCGGTTCCCTCCCCGATGGTCTACCTCGAAGGGAGGGCTGGCTCCCAGTTAGCCCT	-48.3	492
GCTGGACAAACTTGAAAAGTCAATTCATGTGGCCTTTGAATTTTCCTCATTGGAAAGTACTAAATAAATA	-23.4	260
GAAGCTATTATGGAAATACCATGTAATAGGGAGAGTTGAACATGAATATTAGAGAAGGAATCCAGTTACT	-21.4	556
GCTGGCCCGCTGCCAGAAGCTGCTGGACGGAGGGGCCCGGGGTCAGAACGCGTGCTCTGAGATCTACATT	-30.5	768
CTTGGACCCTCCATAGCAACCAAGAGATGTTTAAACTCTCATCCATGGATGTTACCCATGCTCACTTGGT	-26.8	1357
CTTCAACAGGAGAATTTTACTGTGTTTCTTTTGGTTCCATTGTTTGGAGACATTCCTGGGCACAGTTTGG	-26.3	36
GAATCCCCTTCACCAGCACCGAAGCCTAGAAAAGTAGAGTTATCTGAATCGGAAGAAGATAAAGGTGGCA	-33	2352
GTAAAGGCAATGAGCTAGTCCCAGAAAGGATCCTTCAGTTACATACAATTTGTTTAATGAAATGTCATGG	-80.9	277
GTACGCAGTTCAATTTCAAAATTGCTAAAATGTGTTTGAGCTTTAGACTATAACATTTGTTGTAATAATT	-90.8	578
CCACTTCTACCCCCCTAGGAGTCATACATCTGGCTACTTATTTGTTAAAAATAAAATTCTGTACCATTTA	-94.2	1
CAAAATATCAATACTTAACGGAAAATAAGGTGACACGAAGAAAGTACATATGTTAACTATAATGCAGAAA	-19.5	144
TACTAATATGTTGTACATTCGGAAGAATGTGAATCAATCAGTATGTTTTTAGATTGTATTTTGCCTTACA	-20.5	508
TTTGCATATATATGGAATTTCTTACTTTTTTTCTCCCAAACTCTATTTAATAAACTTATTTTAATGTTTG	-24.7	600
AGCTGCAGAGAACATGAGCTTCTACCTCCAGATGTGCCAGGGTGCATCTCAATAAACTTGGATTTTGGCC	-27.6	183
CAGAGCTGGAAGGGCCCTCGAATGCCATTCACAGGAACAGCCCAGGAACCCAGGGACTTCAGAAGGGCTG	-65	302
CCCCAAACCAGGTCTGTACAGGTGTTCTTTATTTTACATGAGGGCTACTTTCCAACCAAATAAAGTCAAT	-25.1	9
AGCTAACTGCCAAAATACATTGACCGTAGTAGCTGTTCAACTCCTAGTACTTAGAAATACACGTATGGTT	-21.3	486
TCCCCAGTTCATTGCACTTTGATTAGCAGCGGAACAAGGAGTCAGACATTTTAAGATGGTGGCAGTAGAG	-24.4	580
GGAGAACCTTATCTTTAAGATGTATTTGTATGTGTAAACATTCAATGTATATTGTATAGTCAGTGTATAA	-20.8	1176
GAGTACACACAACTGTGATAGACCACCAAGTACAGGGGTGATGGAATGTCGAAAAACCTTTGGAGAACCT	-22.4	433
AGGAAACTATAACTAATAGTCATTACCAAAATACTAAAACCCAACAAAATGCAACTGAAAAATACCTTCC	-22.2	292
TGAGGTCAGAAGGCGGAACCGCTGCTGGGAGACGGCGGGATCTCTTTCGCCATGGCTGCCGGGCCGATCT	-31.5	1500
CATTTTCCCAATATCTTTTCTATTCCTTGGACCAATCAGAGATGCTGTAGCTCCTTGGGGCAAAGGTACT	-62.6	313
AGGAACCAAGGAGTGGCCCTCCAGGTGGCAGCACTAAGGACACCCCCCCACAACAAGAGTTAGCAGCGAG	-29.8	245
TTGGAAAAGCTGGGAGGCGGCGTCCCTGCCCCGCGCTGACCTCTTACTCGCGCCTGTTGCTGCAGGAAGC	-31.8	1104
CTACCCCTCCTATTCAGAAGTTTATAGTTTATGGAGATGGATGACATAAAAATGTAAACATCTCCACACA	-23.8	437
TACTCCACTTCCCCACCCCCACCAGGCCTCCCTCCTCCCCTCCTACTCCCTTTTCTCACTCTCATCCCCA	-21	89
GTCCCAGCCTAGACTGCTTACCCCATAGCCACATTTGTGGATGAGTGGTTTGTGATTAAAAGGGATGTTC	-24.2	9
GGCATCCCATGAGCTTGTGGCCTCTATCTGCTACCATCTGTGTTTTATCTGAGTAAAGTTACCTTACTTC	-23.2	180
GCGACATAAGGATGAAATACTGATGAATCTCTGTGACATTACAGGGAAAAAAATATAGTTTTCTATCTCT	-22	596
TGTTGGGTAGAATAGGTTTTCCCCTCTTTTGTTAAATAATATGGCTATGCTTAAAAGGTTGCATACTGAG	-21.5	113
CATTAGAAAGGAGGCTGTAGAATATTTGCCGAGCCTCTACTGTATACCAGGGGCTAACTCACCAAGCACA	-22.5	339
ACCCTCCCCTCCATCTGCGTTGATGCTCAGAATCGCCTACCTGTGCCTGCGTGTAAACCACAGCCTCAGA	-24.8	231
TTGGACTCTGGACTGTTTCCCCTCTCAGCATCGCTTTTGCTGGGCCGTGATCGTCCCCCTTTGTGGGCTG	-28.7	94
TTTTGTATTTTCGGTGTCTCCTTGATTGGTTTTGCTAGTAATTCTGTAAATTGTACATTTGCAATATGAG	-22.1	69
GTCTGGAGTATTTCAAACTTTACATTGAAACATAATTTCCTTGGAAAACAAACCATAAGCCTGAGGAGGT	-24.7	388
CCCTCCACAGACAATGTCCTCTGTTCAATTCCTAACGCAAACTACAATAAATGGTGACACACGTTCAGAA	-22.4	25
ATGGACCGCTCCATCATCCTGCGGCACCTGCTCAACTCCCCCACGGACCCCTTCAACCGGCAGACGCTGA	-30.6	1363
CACAGTTCTGCAAGTATATTGTGAATGTATTGTTCTAGTGGGATACACAAATAAGTCAGTTAAAATACAT	-21.7	439
TATTTAGTCTTCCTTCCACACCCTTCACTCACCATCTTTTCCCACAATCAAATATCACTCCCTGGTACTT	-26	202
ATCCTCAGAATCAACTCTTCTTATCCGCACTGGCTCCCACTGCTTGGACATGGCACCTGAGAGGCCCTCA	-30.5	1410
AAGAGATCAGCGCCTGAGAAGTCGTCGGGCGATGTCCCCGCGCCGTGTCCCTCTCCAAGCGCCGCCCCTG	-27	730
AATGCTTGAAGTCAGCGTCTTCCATTCCAGAAAGACCCCCATTCTTCCTTTGGGGGTATGATGTGGAAGC	-26.3	213
TGGGGTTATAGTGGAGACCCAGAGGATGAGAAAACTTCTCTGCCTCAGCAGAAGAGTGGCAGCTGAGAGA	-24.6	168
GGCATATTTCTGGTAGGGCCCATTGCACATGTGTATCAGTATAGTTATTATTTCATATTAACTTTATGAA	-24.1	310
GGAAATGGCTTTCTACCACTCTGAAAAGTCTCTTCTTGGCCAAACATCAAAGTCTGGAGCCAGAGATGTA	-24.6	374
GCATCACTTAGGGGTGTGAAAAGAAGTATTTTTGAACCTGTTGTCTGGTTTTGAAAAACAATTATCTTGT	-22.9	247
TGCACTAGTTTTATCTGGTACATACAAAAACAGCCATTTAAAATCTGATGATTCTGTGGAATTGGTGTCC	-22	263
GGAGTTAGATTTGGATGTGCTATTGTATGATTACGAATAGTCTGTATGTTTCAAGCCCTTCTGTAAAATA	-30.1	1295
AGGGTCTTCCTATTAATGGAAGAAGGTAATTTTTAGGATGTGTATTATTTCAGTTTTGTATGTTTAACTT	-20.7	277
ATTGTGTCATAGAATTAATTTTCAGCCATGTGGACCATATTTTGTATCCAAGGATCCTTATTTAAAGCTT	-28.7	242
AACATATTCAAGATTTAAACTGGCAGAGAAAGAACATGCAACTCACAGCTGGATCTAAATTGAGAGAAAT	-95.1	791
CTCCGCATCGTGTAGTTTTGTGACATAAGGAGACCTCCTACTTGAGCTGTCTGTACCCCAGAATCAAACA	-23.6	477
CCCAGCAGATCCTACACACATTTTCACAAACTAACCCCAGAACAGGCTGCAAACCTATACCAATATACTA	-27.5	350
TACTGTGATTGAACATCCTGAATACGGAGAGGTTATTCAGCTTCAAGGTGACCAAAGAAAAAACATCTGC	-22.6	534
CGATGTCGCACGGTACCTGCGCGCGGCTGCGGGGGGCACCAGAGGCAGTAACCATGCCCGCATAGATGCC	-35	779
TGACCATTCTAGAAATGGGTTTCGAATGGCACAACACTTTCTATTTCACAAAAGACCAAAAGCCAGAGGC	-23	246
TATCTTCATCAAAGATTCCAACTCACTGGCTTACTACAACATGGCCAATGGCGCAGTCATCCACCTGGCC	-25.8	411
CTGTTTATAGCCATGATCAGATGTGGTCAGACTCTTTCTGGGCCTGGAGACCACGGTCACTTGTTGACTG	-27.8	326
TGCATGGAAAAAAATGGGCTTTGCACACAATGGGTTTGGAGCTGACTGGGAACAATGGAAAAAATTACAT	-28.9	125
TTGAAGCTCTATGTGGATTTCAGTTCACATTTAAGCACCTTGATGGACGTCAGATTGTGGTGAAATACCC	-21.7	1047
CAGTTCCGTCATTCTCGTTCCTGGGGAACCCCCACTCTGACCTGTTATTAAAGTTCACATTTTGAATGCC	-27	32
ACGTGCATAGTTTCGATATCACATCGCGGGGCTGTGTTCGTAGCTGCGTCGTTTCGATATCACACCCTCT	-13.2	542
CATCTGTCCGGCGTAAGGACGACACCGTCAGCTGTCCGACTCGCACACATTTAATAAACTGAGCTCTTGC	-21.9	0
AGGCGGCCGCCACCGCCGTGTCCCCAGGCAGCTGCGTGCCCAGCCTGTACGTGCGCAAGCAGCGGGCGCT	-29.8	7760
CTGCACCTGGACAGCCTCCTCTTTTCTAGAAGTCTATTTATATTGTCATTTTATAACACTCTAGCCCCTG	-25.9	176
TATATTGTCATTTTATAACACTCTAGCCCCTGCCCTTATTGGGGGACAGATGGTCCCTGTCCTGCGGGGT	-29	3525
TTGAACGATAATTTAGAAGTTCTCATAGAAAGCGTATAACATAGGTCTTCAGAAACTATAAAAGAATTTT	-21.6	259
CTCCCTGGATCTTCTGACATTACTGCTGTCTGAGATTTGTATATGTGTAAATACAAGTTCCTTGATACCC	-22.2	1462
GCTGCAGTCCAGTTTTATGATTCTGCTTTTATGTGTCCCTTGATAACAGTGACTTAACAATATACATTCC	-23.8	639
TCGTATCTAAACCTAAGACATTACCAAGGTTTGTACAAATTCTACTACCTGACATTTATTCCAAGAAGAT	-20.7	52
CGTGGACTTGGCCGAGGAGCGGGGCCACCGCGACGTTGCAGGGTACCTGCGCACAGCCACGGGGGACTGA	-34.6	3083
AAAACTTGAAAATATATGATGGCTCGTGGGATGTCCTACTATCACTGAACAAACTAAAGGTGCACTGCTT	-20.5	405
TTCCACACCTGCACCCAAGGCTGAGCCTGCCATCATCCCTGCCACCCGGAACGAGCCCATCGGGCTGAAG	-30.3	888
CTTTGTATTTCATCTCTTTCTACTCTCCTATTTGTATTTTGTGTTCCTATCAAAGTGTCGTATCTGGGAG	-22.3	122
AATCAATGATCAGTTCTAGAAGAGGGGATGAGATGCTGTCTTCTCACACTGTACCTGAACAGTCACATGA	-29.2	477
CTGCAAAATCCACTTCCTCAGCATCAGATCTCTTGATAAAAGCATGAACCTGCATGTAAGGAAACGAGAG	-63.3	551
GGTCCATGCCTAACTCTGTACCGTTTTATTCCTCAAGGCCTATAGCCTGTCACTCCTTGAAGCCTTCTCT	-23.4	214
CAACCCTTACTCAAGATAATCCATACTAGAGAAACACTATAGATGTAAAAATGTGAAAAGTTTTATTCAA	-21.8	550
CGCCTTCTCCCGGCAGCAGCTCTGCAACCTCGAGTGCATCGTGCTGCACAAGCTGCACTTCACCCTGGGT	-31.3	788
GCCACCTCCGGGTGGTGGAGTTCCTGGTGAAGCACACGGCCAGCAATGTGGGGCATCGGAACCATAAGGG	-25	664
CAGGGGCTTCACCCATGAAATTAATAAAACTTATCTGAGTCACTTGAAACTTGGTTCCCAGAAAACACAT	-24.1	237
AATTCCAGAACAAGTTCTACTCAGGCACGGGCTACAAGCTGAGTCCCTTCACCTTCGCTGCCACAGATGA	-26.7	139
GTGGAAGTGCCACATCCAGTTCTTTTCTTTTGTTGCTGCTGTGTTTAGATAATTGAAGAGATCTTTGTGC	-75	204
GCAAGACTGAATTGGTAAAAAAGCATGTCCTAGCAAGACTTCTGACAGACTTCTCAGTGCACGATCTGAT	-24.5	2269
GACGGCGGTGTGGCCTGAGTTGTCAGTCTTTAATCCTGAGTCATGTGGCTCTCTTTTCATCTTTGATGTC	-26.4	677
TGCTCCCTGCCGAGAAAGTGGAGGACGTGGTACAGGGTTGCAGATGTTTAGTTTTAAAAATTCAATTATA	-24.1	701
CATTGAATGTCTCATTTGGCCGAGGAACAACTGAACTTTGTGGTTTGCTGTTTAGCCTTCAGTTTGCTCC	-22.8	231
GCCCAGATTAGGGTGGCTGTCCATCCCTGGATAGCTATTTGCACGAATCATGGACATAAATCCAAGTTGA	-25.4	8
AGCCGGCTGCTGTGAACTCGACCCCGTGTGGATAGTCACACTCCCTGCCGATTCTGTCTGTGGCTTCTTC	-25.1	104
ATGAGTGCACACTCTCACCCCTGCACATGCATAAACGGGCACACCCCAGTGTCAATAACATACACACGTG	-26.5	2405
GGCACTTCCAATCCATCTGGCAGTTCAAGAGGGTCACACTGCTGTGGTCAGCTTTCTGGCAGCTGAATCT	-26.6	818
CTGACTTGTGTTCATGTGGAGTCATTATAAATTCTATAAATCAATTATTCCCCTTCGGTCTTAAAAATAT	-20.9	312
ATTTTGAAAGTTGTATTCTCATATGACTAAGTTCACTAAAACCCTGGATTGAAAGTGAAAATTATGTTCC	-20.9	1030
TGAAAGTTGTATTCTCATATGACTAAGTTCACTAAAACCCTGGATTGAAAGTGAAAATTATGTTCCTAGA	-20.7	1002
GGCTCTCCTGGCCTCAATCTCCATCTTTAGGGTCTCCACAGACTAACATTGAAGTCTTCCAGAAACCTCG	-24.8	682
TAATTTATTCTGTTTTTTAAAAGCTTGTACAGACACTCATGTAGAAATTATTCAAGAAGTTATTGTCTAA	-21	585
GGCTCTGAAATGTTGTGATGCTTATTGCTTCTGTATTTCTTCTCTACTCCCTAGTCTTAATGTTTAACCT	-25.1	375
GGAGCCCTCGATGACTGCCCTTTACAACTCATATTCAGTTCTGCCTCCAAAATGCATGTGTCCACTTACA	-24.9	1888
TGCTGGAAACCTCAGAGTTAAATCCCTATTCTCCACACCTCTCACCTCCACCACCCCTCCCTGTCCCAGC	-30.2	1641
CTTCCAGCTCTGCAGCTAATGAGGTCCTGCCACAACGGAAAGAGGGAGTTAATAAAGCCATTGGAGCATC	-29.5	211
GATCGTTTCTTTTGTATTAGGAAAAACAAGACTTAGACTTCCCGAGTTGTGCAGAGTGACGTCTGTACTT	-22.9	278
AGCCGGTCCTACGAGACGCTCGTGGATTTCGATAACCACCTGGATGACATTCGGAATGACTGGACAAACC	-25.1	335
CAAGACAGAGCTTAAAATGAAATTTACTAATATTTTAGAAAGCTCATTTTTAATGAATAATAAAAGTTAA	-21.6	656
ACCGGTGAGTCGCCGGCGCTGCAGAGGGAGGCGGCACTGGTCTCGACGTGGGGCGGCCAGCGATGAAGCC	-32	907
CACTGGCTTGATGGATCACCCCCAGGAGGGGAAAATGGTGGCAATGCCTTTTATATATTATGTTTTTACT	-27.3	391
TTTCCATAGGAAGGGGCGACACCTTCCTCCCAGGAAGCTGAGACCTTTGTGGTCTGAGCATAAGGGAGTG	-29.1	1079
GCCCTGAGACGGTTCTCTGTTCGATTTTTCATCCCCTATGAACCTGGGTCTTATTCTGTCCTTCTGATGC	-22.5	680
GTGGGCTCTTTTGGGCTAACATTAGAGCCGCTTTTAATATGAAATTAACACTAGTCACTGAAAACAATGA	-19.7	309
CAGCCCAGAGGGACTCCTGGTGGAGCTCAGGACTCCAGCATGAGCAGCCTACAGAGCAGTAGGAAACCTC	-26.3	580
AACTTACTGATTCCCATAGGTGTGTCAACTGACAAATGAATGTTCCATCTCCCTACGACAATTTGCTGCC	-21.7	54
GAGCCCTTTGAGAATACAAGATATTATGTATAAAATGTAACACTGATGATAGGTTAATAAAGATGATTGA	-22.9	4
AAGTATGTCTGCTTTTGATCCTTTAAAAAACCAAGATGAAATCAATAAAAATGTTATGTCAGCGTTTGGC	-27.3	1101
AACAACAAAAAGGTACATATGGGTTCACATTGAAATATGTCTATATGCTGAATATAGCAACATATGCATC	-20.3	180
CCATCCAAGGAAAAAATGGGTGCAAAAATACATTTCTTTACTGAAAACTCCGAAACAATTGTGACTCAGC	-22.5	246
TGGATTGAGTGATGAGCAGACATGTTTAAGGGTCTAAGTCTCAAGAATCTGTTATGTGTGTTTGCTGCGG	-21.6	611
GTCAGCCATTTCAATGTCTTGGGAAACAATTTTTTGTTTTTGTTCTGTTTTCTTTTTGCTTCAATAAAAC	-23.6	737
CCCTGGCGCGCGTCTTTGGAGAGCTGGCGGTGCACGGCGCAGAGCACGGCGTGGAGGACTTTTCCGTGAG	-23.9	355
TATCGGTTATTATCAATAAAGCTAACACTGAGAACATTTTACAAATAAAAATATGAGGTTTTTAGCCTGA	-32.4	467
TCAGAGTTTAGATTGTGAGTCCATGTTTTGTCTGTTGTGCCTATAAAGGAAATTTGAAATCTGTATCATT	-23.2	552
TAGCAGCAATGTTCTATTTTTAGAAACTATATTATAAGTACAGAAATGGTTCTCCGTGTGGTGGGAGGAG	-23.4	828
TCTTAAGGAAGTAGAGTAGTCCTTGTGTCAGAACACATGTTAATCCACAAAACGCCCCATCCCAGATTCC	-22.3	220
GAGAGCATCCTGGCCTGCCTATTAGCGATGTTGCAAAGAAACTGGTAGAGATGTGGAATAACACTTTTGC	-48	153
GCAGCCTGGTGAAAAGAAGGCTGCGAAGCTGAAGGAAAAATACGAAAAGGATATTGCTGCATATCAAGCT	-83.8	144
GTCCCACTGAGGAAAAGAAAGTCTTGTGATTTTTAAAGGCAAGTTTTCAAGTGCTCTCATAGTTCTATCC	-25.8	708
TTGTAAATATTTCTTCCTTGAAGAGGAGAGCTTGGGTGGGGGTTGGGTGGGAGGGACTTGGGTCTTTGGT	-33.5	348
TCTCCATGGTAGGAGTGCAGCTTTCTCCCCCAGTTACTTTCCAGCTCCGGGCTGGCTCAGGACCCGTGTT	-29	539
AACCCGGAAAAAGCACTCGCTGCGCGATACACCCAGAAGAACCTCACAGCCGAGGGTGCCCCTCCTCGGA	-28.3	305
ATGCCAAGTTTTCTGTATAAGTGTTTTTGTAATTAAACTTTCAGATTTTCTTTGTTTTTTAAGAAGTTGA	-21.9	46
TGTACATAGAGAGACAGGTGGGCATTTTTGGGCTACCTGGTTCGTTTTTATAAGATTTTGCTGGGTTGGT	-25.6	32
AAACGCACCGCCACTCACACCTGCAGCTACGCGGGCTGCGGCAAGACCTACACCAAGAGTTCGCATCTGA	-36.7	803
CAATAGTGATTGAGCTCATGTTCCCTGCAAGTGCCATTTCCTCTCCAGGATGGGCCTCTAAAGCTGAGGC	-25.5	87
TACTTTCCTAAAGAACATTAATGATGTGGACACTGCATTGAGTTTTTACCATATGGCTGGAGCATCTCTT	-22.8	1250
TGTTAGAAAAACATGACCAGAAATCAAAGATGTCAGAGCCCCGAAGCAGCTAATGTAATAAGCACTCATG	-25.4	539
CAGGTTCACAACTGTATCCAGAAGGAGAACAAGGACTCTCTCCACTCCAACACAGCCAACCGCCGGACCA	-24.3	307
TGACACTGTGCTAATAGTTATATTCAGTACATGAAAAGATACTACTGTGTTGAAAGCTTTTTAGGAAATT	-21.1	345
ATATACATGAACTTTTTTCATGGCATTATGTGGATGTTTACAATGGTGGGAAATTCAGCTGAGTTCCACC	-24	333
GATTGTTTTCACTTGGTGATCATGTCTTTTCCATGTGTACCTGTAATATTTTTCCATCATATCTCAAAGT	-60.1	16
GACGTTAAAGCTTTCTGGTTAGATTGTTTTCACTTGGTGATCATGTCTTTTCCATGTGTACCTGTAATAT	-62.6	40
AGTAGACTCATTCTTCACACGATTGACCTGTCCTCTTTGTGATAATTCTCAGTAGTTGTCCGTGATAATC	-22.4	243
GACGTGGATTTTCCTGGAAGATCTGGATTTGGTGGAAGACCAGTAATTGCTGGAAGACTGGATTTGCTGG	-24	108
CACAGTAATTTTAAAAACGTTTCTACTCCAATTAAGAATATATATGATGTTATTATATATGCTTATGAAA	-20.6	289
GAAGGCAAAGCCTCTGCTTATGTATTTGCAAGTCCTGGTTGTAAGAAGTGGGATACTTGTGCTCCAGAAG	-25.1	1530
CGCCACGGCCGAGGAAGAGGGCGAGATGTACGAAGACGACGAGGAGGAGTCGGAGGCCCAGGGCCCCAAG	-33.9	296
ACTCCAACTTCTCTTTCACCCTCTATGAGTCCCATTTTACTTCTACACCTGCAAGTCCTGGTTTATATTG	-26.4	727
CTGTTTGTCTACTTCCTCCTGCTTCCCCGCCGCCGCCGCCGCCATCATGAGGGAAATCGTGCACTTGCAG	-33	1495
GGGGCCGCATGTCCATGAAGGAGGTGGAAGAGCAAATGCTTAATGTCCCAAACAAAACAGCAGCTATTTT	-50.1	467
CCAGGACAGCTGCAGGGTAGAGATCATTTTAAGTGCTTGTGGAGTTGACATCCCTATTGACTCTTTCCCA	-27.4	502
CTCCCAGTCAAAAAGAAAGTGAGAGAAGCTGTTGGGCAGCGAACCTACTGTTTAAAATCAGGATAACCAC	-25.5	1597
GTCCTGGTCGAGCAGGGCAGTACTGGACCAGGTCTACGTCAGCATTCAGGTTCAATGGGGACACCAGTGG	-38.9	1131
TTTTTTAATTTTGGAGATAAAAGCTTTAAGAAACTTTTTGAGTTAATTATACTCATAAAATGAGTTTCTT	-21.4	504
TGGTGCTATATGTTTATTGTTATTACTTTGTGTAACTTTGATGTAATGTTTATAAGCTATGAGAATCAGT	-22.1	297
ACTATTTAAGAACTGATGTTCCGATTATTGTATATATTTTTCTAAAAACCAAATAAAGCTACCTATGAAA	-20.5	32
TAAGTACCAGCTCGTCTTCTGCTACACCATCATCGAGAGGAACAATCGCCAGATGCTGCCAGTCATTAGG	-96.4	1289
AGATGATTGCTTTATAATTTTAACAAATCATTGTCTTTTAGTAACATCCTTGTTTAGTGTCTTCTCAAGC	-20.7	553
GGGTGTCCACTCTTTTCTTTCATTAGCTAGGATCTACTAGATGCATTATACTCCATACCTGCTTTTCCCA	-23.7	406
ACAGCCTAACGCTCTTCGCTGTCGTTTGTGGTCTCGCGCAGGGCGGCCCCGGTTCTGGTGTTTGGCGTCG	-32.8	849
CAGTGTGGGATTTGACTCCTCCAAGGTTTTGTGGAAAGTTAATGTCAAGGAAAGGATGCACCACGGGCTT	-24	594
ATCTTTGTTTTATCCTGTATTTAAATAATATATCATGTACCTTTATTGAACAAGGCATCCGTTATATCTA	-21.7	115
TTTGCTGGACTGATGGGAGCCACTGGAATTTTGCTTACTGGTCCCCAGGGCAACCTGGGAATGGGCAAGG	-28.4	185
TTTTTCTTCTTATTGTAAATACACTTTACGTGAATACAGTCTAAGTGAAGAAAATAAATAAAAGGAAGAG	-20.6	699
CTCAAGAACGTCTTTAAGAAGAACCACGTGAACTTGTACCGCTCTGAATCCTTGCAACAAAATCTGCTCC	-23.7	396
ATACTATCTGTTGTTTAACTACTTTAATCGTCATTTTTTACATTTTCAAGTTTATTAGGTTAAGAAAAAC	-21.6	416
AACTATTGTGCACAAGTCTTTCCAGAGGAGTTTCTTAATGAGATATTTGTATTTATTTCCAGACCAATAA	-22.8	19
TAGGGTCCCAGTTCCCAGTGGAAGAAACAGGCCAGGAGAAGTGCGTGCCGAGCTGAGGCAGATGTTCCCA	-28.9	667
TTGTCTCTGGATCTCGAGATAAAACCATCAAGCTATGGAATACCCTGGGTGTGTGCAAATACACTGTCCA	-23.3	576
GTCCGACTCGACCATGACTTAGTTGTAAGGGTGTGTCGGCTTTTTCAGTCTCATGTGAAAATCCTCCTGT	-22	696
ATATGTTTCTCTCTGAAATTACTGTGAATATTTAACAAACACTTACTTGATCTATGTTATGAAATAAGTA	-22.4	584
GACGTGCCGACATATGGCCATTGAGCTCCAACCCACACATTCCCATTCACCAATAAAGGCACCCTGACCC	-23.7	265
CTCGCCAAGGCCTAGGACCTATGTTGTAATTTTACTTTTTATTTCTAAAGTTGTAGTGAAGCTCTCACCC	-22.3	22
CATTCCCCCACCTCTCCAGCTCGCCCTCTGAGCCTCCCGAGCCCTCTCTCCATTTCCCACAATTGTGCTG	-32.4	665
GCCTCTCTAAAGAGGGTGTATAAAGGGTGAAATACATTAGATTTGGCTCAGAAACAGAATGCGGTACTTA	-23.4	632
AGGAACTCCTGAATGAAACTGAAGAAGAAATTAATAAAGCCCTAAATAAAAAAATGGGTTTGGAGGATAC	-27.4	535
CAAAGCACAACTCTATTTCATGCTTTCTGTTATTATCTTTCTTGATACTTTCCAAATTCTCTGATTCTAG	-22	147
TGCAATACCGAACGCAGGGGGCGGTGGAAGCTGCCAAGGTGGGGGCTTTGGCATCTCTCATTCGATCCGT	-36.1	1152
AGCCACCACCAGGCTGAGCAGTGAGGAGAGAAAGTTTCTGCCTGGCCCTGCATCTGGTTCCAGCCCACCT	-31.4	125
TTAGGATCTGTGTGGACTTTTTAGGGCCTAGATGGGCCAGGGGATGTTCCACCGGGAATTAGAAATACCA	-37.4	307
ACAACGCTGTGGATAAGGAGAGTAGAGACTTCCTCTTCCTGCCTCCTGTCTTCTGGAGTTGTGACCTCAG	-97.9	228
AGGGACAAGAGCACAGTTTCTCCTAGGATCTTCACACCTCCCTCAAAATGTGTACATTTTTACTGATTAA	-23.2	33
CAACTGCTAGGATAGAGTTATACACAGCATTTGGTTTATAATTAAGGTGATTTTTGAGAGAGGAGAATAT	-20.7	692
GTACAATGGATGCATTGAAATTATATGTAATTGTATAAATGGTGCAACAGTAATAAAGTTAAACAATTAA	-20.9	29
CGACCAAACCGTAACCGTGAAAGAGTGACAAGGACAGCCTATAGGAAAAACAATACCACTTAAAACAATC	-40	336
GATCACCACCCCTTACAATTCCCTCTACTGTGTTGAAATGGTCCATTGAGTAACACCCCCATCACCTTCT	-23.3	127
CTCTCTATCTTAAAGTAATTTGATCCTCAGGAATTTGTTCCGCCCTCATCTGGCCCGGCCAAATCCCGAT	-34.8	685
ATGTCGTCTGGTCCCTGTTCAACACCCTCTTCATGAACCCCTGCTGCCTGGGCTTCATAGCATTCGCCTA	-100.4	557
ATGACTGGCAGCTAAGGAGGACCTCGGAGTGGACCCGAGCCAGGAATAACGAATGACCCAAGGCCAAGGA	-24.8	279
TCAAGGAGCAGAAGAATCTCAATTCCTTCTTTGCCGTCATGTTTGGCCTCAGCAACTCGGCCATCAGCCG	-25.6	1004
TTAAATTGTAAACATTAAAGTGGTCCAGTTTTATAAATGGTCTTTATTTTGAAATACGCTTTGACCCCAT	-50.4	54
GAAGAAACTGCCATTACTGTGATGTTTCTGAATACTACCAAACAGCCATACATGTCTGCAATGAAGAGAT	-75.4	374
GAGTTTCAGTCACCTAAGTACACCCACAAAACAATATGAATATGGAGATCTTCCTTTACCCCTCAACTTT	-32.5	994
CACTTTTCTAGCGTTGGTACATCTGAGAAATGAGTGCTCAGGTGGATTTTATCCTCGCAAGCATGTTGTT	-40	322
GCAAGTTTTCAATCTTGGACTTTGAAAACAGGATTAAACGTTAGTATTCGTGTGAATCAGACTAAGTGGG	-20.9	79
CCACTTGAGAAGTGAATAAATGGGGCGGTTTCGGAAGCGTCAGTGTTTCCATGTTATGGATCTCTCTGCG	-21.5	1128
GGAGGGACCATTATTACATCTCTGAACTACCTTTGTATCCAACATGTTTTAAATCCTTAAATGAATTGCT	-22.4	722
TTGCACCTTGGAATTTCCTGTGGAGGTGAACACAGTACTACATGGCTTTGCCGGCTACTTTGAGACTGTG	-25.6	619
CGGTTCTTTCCCCACCCCAGGTCTGTCTCTTGCCTTTTCTTGGGGCATATAAGCTACTGAGTGGAACATG	-26.9	580
TTGATGCCGATGGCAACTACTTCCTGAACCGGGATGCTCAGATCCGAGACAGCTGGCTGGACAACATTGA	-24.6	808
TTTGATGCCGATGGCAACTACTTCCTGAACCGGGATGCTCAGATCCGAGACAGCTGGCTGGACAACATTG	-24.6	2872
TCATGCCAAAGAGGAAAGTGACCTTCCAAGGCGTGGGAGATGAGGAGGATGAGGATGAAATCATTGTCCC	-26.9	1125
ATGGAGATGGGGTTCGACGAGAAAGAGGTGATAGATGCCCTCAGAGTGAACAACAACCAGCAGAATGCCG	-23.1	938
GCCTACCCTGGTCCTGGCGGGACTTCACTATTTGACTTGGTTTCCTTTCAGATATTCTTGGCTCAGGGCC	-27.1	315
AGGCAGTGAGAGTCACAAGATGATCGACTTGTCCGGGAATCCGGTGCTTCGGATCTACTACACCTCGAGG	-22.8	1139
AACTGTAAGCCAGTGCATTATGATACAGTTGTAAGATTGTGCATTTGATTCAAGATAAGGAAAAATCTTG	-21.2	447
GAATTTTTCTGCCCTACAAAGGGTGGAAGAGAAAGGACACAGTATTTTCATGAATTTACCATATATCTTT	-24.3	289
CATTATCAGGTCACATAAATCTGCCTTTATGTTGCATAAGTGAAAATTTAGAAAATTAAAAGCAATTATC	-20.9	199
CACCAAGTATATTTTGAATTGGTTTCTACACATTTCCAGTAGTATGGCAGTACAGTGCTCTGTTCATTGC	-20.9	595
AAGTCCAAACTGGACTGGGAGAGCTTCAAGGAGGAAGAGGGGATTGGTGAAGAACTGGCCATCCATAATC	-27.7	345
AGAGAATCCCCTCCATCTTTGGGAGGGGTTGATGCCAGACATCACCAGGTTGTAGAAGTTGACAGGCAGT	-24.9	267
TTACATCGTCGCGTCTGCTCAGGTCTGGATGATAACACGCTATGATCTGTACCACACCTTCCGGCCAGCT	-24.3	250
CTCCCAGAATTCAGGTCGTGCTTGTTAGTACTATATCACCAAGTCCATTCATTTAATGATCCAAAACTGT	-21.8	57
TCCTGTTGGGACAGTCAGTTGGTATGTATCCAAGTCCCTGCTGACCACTAATGTTCTAGCTGATGGTGAG	-25.8	110
GGACTATACAGGATGTTAATAATGAAGCCATATGTTTATGTCTGGATTTAAAAATTTTAAACAATCATTT	-70	175
CCTATACCATAAAGTGTAGTTACCATACAGATTAATATGTAGCAAAAATGTATGCTTGATATTTCTCAAC	-60.9	589
TGTTCCGGGCCTTTGGCTTTGCATCCTGGACGGGGAGTGTCCTGTCAGGGACCAGATGTGTCCTGCCTCA	-25.3	638
TATGAAAGTTGGCACTTCTTTTTCCATCCCGGTTGTCAGTGATGTGCGTGAGCTGGTGCCCAGCAGTGAT	-26.3	318
TGCAGCTCATGCACGCCAACGCCCAGCGGACAGATGCTCTCCAGCCACCACACGAGTATGTGCCCTGGGT	-27.9	336
GTAGGCTGAAATTATAGGTACATCTGTTTTCACTATATGATATTAAGAAAGCGTGAAATGACTTAAATGT	-76.2	271
ATCTGTAGGCTGAAATTATAGGTACATCTGTTTTCACTATATGATATTAAGAAAGCGTGAAATGACTTAA	-76.5	500
GATAATAATCAAAGGAATTACTCTCTTCTTGTTAAATTAGCTAAATCATGTAACCGCAGATAGGAAGGGC	-20	301
GCCTGTGCGCCGGGGGACCTGGGGACTCGGGTGCTGGGAGTGTGGCTCCTGTGGGCCCAGGAGGTCTGGT	-30.5	762
CCCAATTCTATATGAAGAATTCATGGAGAGTGTACTGGCACTGGAAGAGTTTAGTGTTTCTTGTATGCTT	-27.9	339
AAAAGGCTACAGTGCCTCACAAAGGATGTTCCCAGCAAGTTGTTTAAATTCCCAGCAAGTTGTTAAAGTG	-24.7	751
GCCTTTGGGTGATGGCTTTTTCTTCCCTTTTCCTCCCGCGGGCCTGTTTTCAGGTGTTCCTAGCATTTCT	-26	566
GTCTCCAGCTGATTAGCCTCAGACTCTTCTTTTATTGTTTTTCTTTTGTAAATAAAAAGCACCAGGTTCC	-24.9	4
GCCTGGGCTCGGCATTCCGAAGCTGACTTTCTATAGGCAATTTTGTACCTTTGTGGAGAAATGTGTCACC	-23.9	142
AAAGAATAGTTATTTTACAGTTCCAGGGATTGTGAAATAAATGTTGCAGTTTTTTAAAATAATGAAAATA	-81.2	39
TAAAAAATAATTGTGTTTGACCCCAAATGACTTTATACCCAATTCTACATAAAAATATAGAAGATCTATC	-79.7	529
TATATTGATATATATACTAGTTGCTATGAAAATATCATGGAATAATAGGGATTTTAGGGTGGATACTTTA	-77.7	299
ACCCACTGGGAGGATCTGGATCAAGAATTACTGCACACCTGGTTCACGAATTAAGGCGTCGAGGTGGAAA	-32.3	412
CTGCCAAGGCTGCCTTGTCTGCTGGCAAAGTCTCACCTGAAACAGTTGACAGTGTGATTATGGGCAATGT	-27.2	1360
CAGACCAGGAAAGGCTTGGCTGGTGTATGCACAGGGTGTGGTATGAGGGGGTGGTTATTGGACTCCAGGC	-31	327
AGTTTCACTACAGTCGCTACATCACCATCCGGAGGAAAGCCGAGCTAGCCGCCACGCTGGGGCTCTCTGA	-29.8	1255
GCTGGGCCTCTCCTGGGACTACCAGTGTGGCTCTTACGTGTTTTCTTTGCTAAAATAAACCCTAGTTCTT	-28.4	234
GGTATTGTAGCATGTATTGTTTATTTTAGTCAATAGACCCTCTCCTTATAAATGGTGTTTAGTCTTCCTG	-21.1	285
GATTCTGGAACTGAATGGCGCTTCGGGATTCTGAGTAGCAGGGGCAGCATGCCCAGTGGGCCTGGGGTCC	-71.9	296
ACTGAATGGCGCTTCGGGATTCTGAGTAGCAGGGGCAGCATGCCCAGTGGGCCTGGGGTCCCGGGAGGGA	-68.4	277
CCCCACTTTGAAGCCATCTCTGTTCTGCAGGTGAGAGGATTTAAAGTCAGTCACAAAGGCTTGGGAACAA	-28.1	751
GTTTTCCCTGATAGCACTTTTCAGAAAGAAGTCTGGACCAGGCTGAAGGCATTTGCAAAGCTTCCCCCAA	-27.1	340
GTGGGAACCCAAGGTTCCATAGTCCTCAGCACCCCCCTGAGGAATTTGGCTTCGGCTTCAGCTTCAGCCC	-31.6	829
TTAATAAGCTTAGCTTCTCTTGCCACCTCAGGGGCTTGGATATGTGGAATAGTGAACTGGGGCCATGTCA	-47.9	319
ATTTCCAAATTTTTGTACAGTCGCTGCACATATTTGAAATCATATATTAAGACTTTCCAAAGATGAGGTC	-21	127
CAAACAGTGCCCTGATCTCCGTTGGCTGCTTGGCCATATTTGTCACTGTGATCTCCCTCTTGGTGTACAA	-24.6	1152
ACAAGAAAACATTGCACCAGCGTTCTAAGCCTCAAACAAAACACAAAACAAATCCCCCTGCGAAGCAACA	-24.9	30
TGAGCAGGATGTCCACATGCATGACCCCCGGCTGATACCACTAAAAACCATGACGTCGGACATTTTAAAG	-25.1	617
AGAAAAGTATCGTGTAGTTTACACTGATCATCAAAGATTGGAGCTGGAAAAGGAATTCCATTGCAATAGA	-23.3	267
ACTGAAGAAGTGCGTGGAGGATTACCTGGCAAGGATCACCCAGGAGGGCCAGAGGTACCAAGCCCTGAAG	-26	368
TGTAGGAGAATCCAATTGTACCTGATGTTTTTGGTATTTGTCTTCCTTACCAAGTGAACTCCATGGCCCC	-22.6	572
GCACTGGGAGATTGGAAGCACTGCTAACATTTTGAATTTTTTTCTCTTTAATTTTAAAAAGATGGTATAG	-23.6	404
GTATAGTTATATTGACTATAACATGTAAGTAAATAGCTTTCTACTGACCCTAAGTTATCAAGGTGGAAAA	-21	274
TTTTAAATAACAATGTTTATTTGAACTAATATTAAATTAACAAATTCAGTGTAATCAAAATGTGTAAAGA	-19.9	515
AGAGACCATGGAAGTGTCAGAGATTCAGAATCCAAGATTGTCTTTAAGTTTTCAACTGTAAATAAAGTTT	-32.3	12
AACTGACTCGCGAACTATTCCATCCCCAGCCGATAGTAGACGCTTAAAAAAGAACGAAAGAAGGTGGGTG	-24.6	170
AAAATTTTTATTGTATAGCAATTCTCTATAAATAGTAGATAATCTAAGTCCTTATTTTCTGATGGCTCTT	-20.9	346
TGTGCACTGCCCGGCCTTCAGAAAGACAGAATTTCATCACCCAATGCAGGGGGAGCTCTTCCTGGACCAA	-26.2	151
CGGGACCCCCATCGCGGCCCCAGCGCCCCTTCTGTGCTGTCTGTGGCTTCCCATCCCCCTACACCTGTGT	-45.8	528
CCAGGACTACAGCTTTCCTATATCTTCTATTCTAGAGTGGTAAACTCTCTATAAGTGTTCAGTGTTGACA	-25.3	40
AATTTATACATAAAATGTCTGGTTGACTGTATACCTTGTTTTTGAAGAAATTTATTCGTGAAAGGAAGAG	-21.1	335
GGCCCGCTAGCCACGTCAGCCAAGCCACTTTAGGTCCATTTTTTAATTTTAACAGTGCTCTTCCATCTTG	-25.8	51
CTATACAACAATATAACTGGTAGTTCTATAATAAAAATGAGCATATGTTCTGTTGTGAAGAGCTAAATGC	-21.1	574
TTTCATCCCCGCCATGGCGGAGCTGATCCAGAAGAAGCTACAGGGAGAAGTGGAGAAATATCAACAGCTA	-30.1	993
GGGGGAATAACTTATAATGCTGTTTAGTTTTGTACTATTGGTGTGTTGGTGAATTTTTAAACTGTGTGCT	-24.9	1330
CTATTTCCTGCTGAAAGTAAATGTTTTTAAAAAGTATCATATAAAGCTGAATACAAATTGGTTTGGGGGG	-23.6	883
TTCGCAAGATCATGGCTGCCCGGCAGAAGAAGCGGACTCCCACCAAGAAAGAAAAGGACCAGGCCTGGAA	-26.8	716
GGGGATTCAGTTCTGGAAAAGAATTTGGTATTTTCCAGTCTGCTAGGACCAATTACCTTGAAATATTTTA	-23.3	747
CAAATTAGACAAGAAAAAGTATCCCTATTGGCCTCACCAACCAATTGAGAATTTATAAAATTGAGTCCAG	-62.6	85
GAAACCAAATTAGACAAGAAAAAGTATCCCTATTGGCCTCACCAACCAATTGAGAATTTATAAAATTGAG	-61.8	280
GTAGCTCAGAGAGCACCTGATGTATCATCTCAAACACAATAAACATGCTCCTGAAGGAAAAAAAAAAAAA	-49.4	3
GCATTTTAGCCTAATTCATTATCTGTATGAAGTTATAAAAGTAGCTGTAGATGGCTAGGAATTATGTCAT	-59.6	166
GGGGAGCAGATATCTTGTTGAGGTCTGGATATTATCTCCCTTTATAAACTTGGTGTAGGCCGTATATTTT	-20.9	511
GTGTTTGGCAATGTGCTGTTAAAGTAATAGACTTTTAATCTTTATGTATTTTTTGTTTTCTCTGGAGTAC	-24	242
CGGGACCTATGCCTGTTTTGTCTCTAACTTGGCTACTGGCCGCAATAATTCCATAGTCAAGAGCATCACA	-23.3	921
GAGACTACTTACTTTTATGGGAATGGCAGTAGAAAATAAGGAAATTTCTTTTGACACAATGCAGCAAGAA	-23.9	316
AGTGAAAAACAGCCTTTTGAGTCTTTCTGATACCTGAGTTTTTATGCTTATAATTTTTGTTCTTTGAAAA	-65.1	327
TACCCAGTATGTGCAGGGAGACGGAACCCCATGTGACAGCCCACTCCACCAGGGTTCCCAAAGAACCTGG	-28.3	173
TCTCTCCAGAGCAGCAGGAAATGTTGCAAGCATTCTCTACCCAGTCTGGCATGAACCTCGAGTGGTCCCA	-25.2	574
GTCTTTGTCCTTTTTCTTGCACTATAAAATTATAAGGTCATAAATGTTTTGGTACTTGTAGATGTTTATG	-21.6	155
CATGTGATGCTCAGTTCTATTTTGATTTATTCATTAGTATTCACTTTTACCTTTAAAGTTTACTTGTAGC	-21.2	499
CCTGTCTTGGGAAGTCCTTCTCCATGTCTAACCAAGATCTATATGGCTATAGCACCAGCTCTTTGGCTCT	-23.4	364
TGGTGAAGAGAGGGGAGACTGAAAGCAGTGGGGGAGGGTGAGAGAGGGGAGCCAGCAGAGACTCAAGTGG	-31.6	1401
GCTTGCAGGCCCAGTACAAGCATATATATTGTGCCTCTTACAGCCTTTGGAATACATTGTTTCCATTTTT	-23.5	225
TGTAAAAAACTCGGCCTGGTGTTTGACAATGTGGTGGGCATTGTGGAAGTGATCAACTCCCAGGACATTC	-25	1581
AAACCTTTATGTACTTAAAGTTATACAGAAAATAGAATAAAGTTAATACCAAACTTGAAAAAGCGGCCGC	-55.4	0
GAGGACTGAAACCTCCACTGCAGGCTGGTTTTAGGTCTTGAATTATGTAAGAATCTTGCACAGCACTGCT	-62.9	602
ACTGGTAGCCCCTCTGTCATTTTGCAGGACAGATACTCAGGCTAGATATGAGGATATGTGGGGGGTCTCA	-24.9	256
ACCAAGACCTGCTGGCCTTCCTGCTAGAGGAAAGTGGAGATTTGGGGACGGCACCCGATGAGGCCGTGAG	-27.2	1321
AACAGGCATTCTCACAGCTGGGTTTATAGTCTTTGGGCCCCTTACTCAGTATCCTGGGAACCCTGGGCCA	-25.9	222
GTGAACTCTAATTTTAGGTCTGCAGTTTTAACATCTTCCATTTCTAACTTCATTATAGCCCCAGTGTCCA	-22.6	669
GGCCTCTTTCTCACCTTTACACCTGTCTTCTTATCCTCACATCTGTTTTCACACCTTCATCCCTGTCTTC	-24.8	488
GCTAGAATAAGGTAAATTGATACACAACTGCTATTTTTAATTTAGAACTTTGACCTAATTTGGGTTTTCA	-19.9	62
GCCTCCTCATTGTCTAAATGAGGCCTAAATGTGTGAAGTGCGATTTCTGCTTTTGTGTACCCCACCACCC	-25.2	53
TCGTTTGTTTTTGTTCTGAGCTCCATAAGAACTGTGCTGACTTGGAAGGTGCCCTGTGCTATGTCGTGCC	-28.7	775
GATGCATCTCTCATCAATGCTACGGAAGGCTTTGATTCATCAGTCTCGGGCTCTTGGAATACCTAATTTT	-21.4	281
CCATTACATGAAACAAGAAACCAAGCATCTTTGCTGTTGTTAATTATTATATGTGCCATTGTTACAGGAG	-22.9	124
ACAGACACCTCAAGGATCTGTCACGGAAGGCGTCCTTTTTCCTTGTAGCTAACGTTAGGCCTGAGTAGCT	-21.5	446
TAGCAGTGCTGACTAAGCCGAAGTTTTGTAAGGTACATAAAATCCAATTTATATGTAAACAAGCAATAAT	-20.4	455
GTCTGGGTTGTGTAAGGGTTAGCTACCACCCTATAACCTCCCTACCAGGTAATAAGGAGACCAAGTCTTT	-22.4	94
GGAAGGGTCTGAGACTCCCTTTCCTTTTGGTTTTGGGATTACTTTTGATCCTGGGGGACCAATGAGGTGA	-23.9	224
CGGGGGGCAGTCTGGAAAGGTTTCCTAAAGGAGACGAGCGAATTAACGGTGTCGAGGTGAGCCAGGGCCA	-25.8	442
CTGTAAATACGGCCCCAGGGTGGTGAGAGAGTCCCATGCCACCCGTCCCCTTGTGACCTCCCCCCTCTGA	-28.6	110
TTGAGCCCCTCAAGCTCCAGTCAATGATCCAGTCCTTCCCCTTTGAAGTTTTCTGCTCTACTTTCCTTGG	-24.7	322
CAGTCTTATCTTCCAGCATGATAGGATTTGACCATTTTGGTGTAAACATTTGTGTTTTATAAGATTTACC	-22.5	119
AGGGGCCCTGAATTTATGTGGTTTTTATACATTTTTTAATAAGATGCACTTTATGTCATTTTTTAATAAA	-21.5	21
ATAAAAAATAATCTATTTCTATGAGAAAAGAGGCGTCTGTATATTTTGGGAATCTTTTCCGTTTCAAGCA	-21.9	47
CTGATAGACAGTAACGGTGTTTAGTTTTATACTATATTTGTGCTATTTAATTCTTTCTATTTTCACAATT	-20.3	628
ACTTTTCAGTTCTACTTTTATGATGTGAATGAATGCTACGTTTTATTAAATATTACCAGGTCAGTACTAT	-19.9	528
CCAGGGGGTGATTTAAATAGGTTTATTTCTTCATTTACAAGAGGAATATATTTGGCTTCTCTCTTAAGAC	-21.6	70
TTTATTTCCACTATTTTCAAAGAAAATAGATTAGGTTTGCGGGGGTCTGAGTCTATGTTCAAAGACTGTG	-21.6	730
ACTGTGATCCAAGAGCTCCTACCAGGCAAACCTCCCAAGTCCCGAGTACTCCTGAAGCCGGCCAAGTTCT	-25.7	950
TGCCGAGGCTGTAGGGGCCTAGAAGTCCACCATCCTGCCCTGCAGTCACATGGGTGTGGCCTCCAAGCTC	-29	721
TGACATTGACAGGGATGGAACCATCAACCTCTCTGAGTTCCAGCACGTCATCTCCCGTTCTCCAGACTTT	-24.2	267
ACAGCAGACTGCCGGTAACGCGCGGCCGGGGCGGGAGAGACTCAGCAACGACCCATACCTCAGACCCGAC	-34.5	350
GCCCCAACATCTAAGGATATACAGTGGGCGGATTCCCCTTAAGTTCCAGGTATGTGTTACACTTTCTAAC	-21.7	487
ACATGAGCAGAAGAATCGTTTTATGCTAGTTATTGCATTCATGGTTGAAACTCAACTTAGGGAAAGGGTT	-22.6	295
GTAAATGAAACCACTCAAGTGGTAGTGACTCCAGCAGACTTAATTACATTTTAAGGAACACTGTCTTTCC	-23.3	2435
GGCCCCCTGCCCGCTCGCGGACAGATTTTTTATCCCTGGGATCATGAGCGTCCGGTCTTGCCCACAGGGC	-24.2	334
TTCAACCCAACGTGATGAATATTTGATTTTGTTCTAGATTTCCTGTAGCTGTGAATTGTTAAAATGTATG	-23	116
AAATGGGGCCCCCTCACCACCACCCTGGCCACCGCATGCCTCATCCTGGCATCAACGAGCACCCGCCTTG	-31.5	2204
CAGCTCCCACAAAGCACTCTAAGGGAGATGGGGCTGAGGACAGCTCAAAAAGGAGAGGACAGGCCTGGCA	-30.6	282
CCGACCCACCATACCTACGCCTAGGGAGCCCGTCCTCCAGTATTCCGTCTGTAGCAGGAGCTAGGGCTGC	-26.5	245
AGCTGCTGATGGCACCACTCAGCGAGGATCAGAGGACAGCACTGCAGGAGGTGTACACACTGGCAGAGCA	-27.2	175
TCAGTGACTGGAGGAATTTTTTTCAGGTGCTTCCTATATTACCATCCCTCATGCATATTAACTCTTTAGA	-23.9	659
TTACAAAATTGATATTTAACACTTACCCACTCCCCTTTCCCCATCTCTTCTACCGCTCTTGTTGATCGTG	-34.4	588
ACGCTTAAAGAAGGAAAAGAAACGGCTGGCTGCACTTGCCCTCGCGTCTTCAGAAAACAGCAGTAGTACT	-29.1	1190
TTGGGAGTTGGGGATCCCAAGATTGGTGCCGCAATACAGGAGGAGTTAGGGTACAACTGCCAGACTGGAG	-24.3	1595
GGATGCTAAAATAAAAGTCTCTGAAGTATTCCATGCCTTTTGGACCCTTTCCTCGCAACTAACTGTCAAC	-22.3	704
ATCCTGCTGGGGGCCTAGAACCCTGAGACATAGACCATGGATAAATGGCAACCGGGGTGGCAAAGAGGGC	-34	336
AAGCATGCTTATACAATCATGTGCAACTTTAAACTTTAAGAACTCTGGATGAATACATGGTGGCAACAGT	-22.2	156
GTACTGGCAGGCTCGTTTTACCTCATTCTAGAATATTTAAGAATCTAAAAATAAAGGGCAACTCTGACTT	-22.1	11
CGCCAAAGATGCACCATGTAGAATTTTCACTTTGTACTGGCAGGCTCGTTTTACCTCATTCTAGAATATT	-22.8	338
TGGCCAGTGTTCGGCGTTGCTCGGGATTCAAGATACCACCAGTTCAGAGCTAAATAATAACCTTGGCCTT	-22.9	40
AGGAGTGGCCAGTGTTCGGCGTTGCTCGGGATTCAAGATACCACCAGTTCAGAGCTAAATAATAACCTTG	-22.9	2606
GACAAACAGCGGAAAATCTACTGCGTGGCTTGTCAGGAACTCGACTCAGACGTGGATAAAGATAATCCCG	-23.9	377
ACAACCTGAACTCCCTGTCACATGATACAGCCACTGGGCTTATACAGTATGCATTGGACCAGGGCGTGAA	-24	758
AGGATGTGGCCACTTGACTTGTGGAAGGCCATCTTGATGCCAGGACACACAGGAAGCCCCTGTGTGACAT	-27.3	305
CTGCCCTTGTTTCTTGTGGAGTCAGGTGATGAGGCAAAGAGGCACCTCCTCCAGGTGCGAAGGTCCAGCT	-27.8	799
CCCGAGGTGGTGTACAGCGCCCACGCATTCCACCAACCTCATGTCAGCTCCCCGCGCTTCCAGCCCTGAG	-26.1	318
CCAAGTCTGGGGCTTCTGAAATGACCTGGTATTTTTATGTTCCTGTTAGAAATGGTGTGGCTTTCACAAA	-23.9	192
CTCAAATTGGCCAACATACCCTCAGCTGTATGTGAAAGGGGAGCTGGTGGGAGGATTGGATATTGTGAAG	-102.7	1185
TATCTTCTCAGATGAAGAGGTTCGACAGGGACTCAAAGCCTATTCCAGTTGGCCTACCTATCCTCAGCTC	-59.3	1331
GAAGTATAGACAGTTTAACATTTGGTATTAAAGGAGAGGAAATTGTAGCAGCTTTTCACGTTTCCCAGTC	-21.2	280
GTGGGAATCAAAATCCCCCAAATGTTAAGGTATATGGTAAAAAAAGAAATATCTGGGATCCCGATGTTCT	-22.9	2714
AGAGCAAAAAGAGTTCGCCCATGGATCGAAACAGTGACGAGTATCGGCAACGCCGAGAGAGGAACAACAT	-22.8	399
GTGTGGGGAAGGATTGGGTCTTGTCCCCCAACACAGCTTCTGTGGCTGACTGTAATACTGTACAACTGTT	-25	187
GACATTTTATGTGACAACTGCCAAAAAAGTATTTTTAAGAATTTAAGCGAAATAAACAGTTACTCTTTGG	-38.4	1
GACATGTTAGCTGAAAAACTTCCAAATCTCACACATCTAAACTTAAGTGGAAATAAACTGAAAGATATCA	-75.7	957
GGCACTTTTCTGTTTATTTAAGAGTCAATTGCTTTCTAATGCTCTATGGACCGACTATCAAGATATTAGT	-22.1	83
GCTGGGCGCGCACGCAGAGTGGCCTGCAGTCCTACCTGCTCCAGTTCCACGGCCTCGTGCGCCTGGTGCA	-28.4	999
AATCTCTATCACATAAGGATTATATATTTGAACTTTTTAAGTTGCCTTTAGTTTTGGTCCTGATTTTTCT	-21.6	38
CCAGCTGGAAAGCTGAAGTATTTCGATAAACTGAATTGAGAAATACTTCTTCAAGTTATGATGCTTGAAA	-22	287
AGAATTGTAATGTGTGGGATATAAATTAGTTTTTATTATTCTCTTAAAAATCAAAGATGATCTCTATCAC	-28.4	930
ACTTCGGAACCTCAAGAACAAACTGGAGAATAAAATGGAAGGAATAGGTTTGAAGAGGACACCGATGGGC	-27	637
AAGTTTTAGAAATTTGGTTTCAAGTGTACATGTGTGAAAACAATATTGTATACTACCATAGTGAGCCATG	-21.8	878
AAAGAAAGTGTTTGCTGAAAATAAAGAAATCCAGAAATTGGCAGAGCAGTTTGTCCTCCTCAATCTGGTT	-26.6	1316
TCAGCCGCTCCCTCTGGGCTTCCGTCCTCCGCCCGCGCCCGACGGAGCCTGTTCGCGTCGACTGCCCAGA	-32.7	1549
ATCCAGGGCCTCCGGATAATGTGAAGCTGAGTGAGCCTCCGCCATCCAGCATGACAAACTGTGGCCGACC	-67.5	313
CATGGAACGCTTCCGCAACATGGACAAGAGAGCCACAACTGAGGACCGCAACACGGCCTTGGAGACGCTG	-45.8	481
CCACATTGGAGAAATGGTTTTTATTGTCAACCTTAACACCCATCACCAAATCGGTAATTTCAGGGTCTAA	-23.1	740
GTTTTGCGTGGTTGGTTTTTATTAATTATCTGGATAACAGCAAAAAAACTGAAAATAAAGAGAGAGAGAG	-23.9	5
AACGAGAAACCACAATGGCTCCATGCTGCCCTTCAAACGTGGCGCCTTCCATCTTGCAGTGCAGGCCCAG	-31.1	1379
TCGAGGGCAGGGACTCGCGCCCACGGCACCTCTGGGAGCTGGGATGATAAAGATGAGGCTTGCGGCTGTG	-28.8	508
CAGTTTTAAAAAGAGAAAGCTTTATAACCTCACCAATGAATACAAATGTTTAAATAAAATATTGATTAAA	-22.1	14
GTGGAGGGAGATACAATTTGATGCAAGTCTTATACTTTTGATGTCAATTTATTCTTCAGAAATAACTGGT	-21.9	13
GCAGCATTGCTGTTGATATTAGTGAGAATCTGAAGGAGAAGAAAACAGATGCTAAGCAGCAAGTGTCAGG	-24.2	683
TTACCTGTTTTTTCTTTAGCAAACCAGGTTATGTGGTGTAAAGGTTTGTTATACGTGCCACAATATAGCA	-19.9	268
GTGGTGAATGGAAAAGAATGTATAAACTTCGCCTCATTTAATTTTCTTGGATTGTTGGATAACCCTAGGG	-24.1	2905
CCAATTCATGTACAGTATTTTGTCCTAGCAGCATAAAGACCTAGCTCTTTTCTTACAAGAGGCAGAAACA	-23.7	308
TCAGATGCCTGCAGTCATTAGGTTTTAGCGTCCCATGAGCCTTGGTATCAAGAGGCCACAAGAGTGGGAC	-27.9	285
ATCTTTTTTTAATGGAATGTGGTACAAATTGTTCATGTTACCAAAGCAATATTTCCCTGGAATTTAATTC	-22	915
CTTATTTCTGTGTTACTCATGTACATTGGTCTTTCTACATAGTTATTCTATCACTGGCAATATTTGTTCT	-21.7	50
GAGCTGGACCCTGTAAAGGATGTTCTAATTCTTTCTGCTCTGAGACGAATGCTATGGGCTGCAGATGACT	-24.4	338
TTATCTAATAAAGACCTTGGAGCATATGTGCAACTTATGAGTGTATCAGTTGTTGCATGTAATTTTTGCC	-22.9	266
GTCCTACTTTTAAAGAATTTCTTTATAAAATTTACTGTCTAAGATTAATAGCATTCGAAGATCCCCAGAC	-18.8	437
CCTGGAAACGGATGGCCTCTACGCTGTTCCATCACAGTCTCCAACTAAGGCTTATGGTATTTCATTAAAC	-23.2	314
CTGAGATACTGGTAATCATCCTGTGAAAAATGTACAGAGATGCAGGTCTGTAATATAAAAATCTTAAAAC	-21.4	693
CATCTCCCCCTCTATATCCTCACAGAGCCCTAACATTATCTTCACACCACTCTCATCAAAGACATGTCAT	-23.3	147
TGGTGGCTCTGGCTGTCTTTTTCGGCGCCTGTTACATTCTCTATCTGCGCACCTTGGAGTCCAAGCTTGT	-24.8	359
CACTTCTGCACCCTTTCACCACCTCGAGGAGATTTGCTCCCCATTAGCGAATGAAATTGATGCAGTCCTA	-23.6	10
CCACTTCTGCACCCTTTCACCACCTCGAGGAGATTTGCTCCCCATTAGCGAATGAAATTGATGCAGTCCT	-24.4	1862
ATAGATGCAGCTGATACATTCTTTTCAGCTTCTTATTGATGATTGTAGATAGAAAAATCCTTGTTTATTC	-22.4	597
CCACTCCCATCTCCCCCGACAGGCAACTCCGAGTCTGCCCCCGTCCCTGCAACGGGTGACTCTCAGGATG	-28	247
CACTCCCGTCTCCCCCGACAGGCAACTCCGAGTCTGCCCCCGTCCCTGCAACGGGTGACTCTCAGGATGC	-28	312
TATTTCCGTAGGCTTCTTAGTAGCAGCTTTGTACACTGAGGACACTGTAGCCAGGAACCTGTGCATGCCA	-23.5	133
ACCAACTCCACCTACGCAGCAGACAAGGGGGCTCTGTATGTGGATGTGATCCGTGTGAACAGCTACTACT	-59	689
ATTGCCTGTTCCTCATGCGTGCGAGCCGTGGATGGGAAGGCGGTCTGCGGTCAGTGTGAGCGAGCCCTGT	-25.6	298
AGGAGGAGGCAGAGTGGGTGGGCCTCACGCTGGAGGAGGCCATTGAGAAGCAGAGACTTTTGGAGGAGAA	-32.2	399
TGACAGCAGCCTCTGAGGCTGCGTGCCTGATCGTGTCTGTAGATGAAACCATCAAGAACCCCCGCTCGAC	-28.6	198
CAAAAGGCAGATTTATCTTCTCCCAACATTCTGTTATTTCTGATACTTTTGAAAAACTAATAAAAACTAA	-23.9	314
CAGAAAGTTTTCAAGTGAAGCGACAGGTTCTTCTGAGTGCAGCTGAAGCAGCAGAGGTGATTCTGCGTGT	-28.6	594
TAACTGCCCTATCCAAAAAGACAAGACCTATAGCTACCTGAATAAACTACCAGTGAAAAGCGAATATCCC	-26.1	718
TCAGCAACCTCTGCCGGCTCCTCGCTTCCTCGATCCAGAATCCACTCTCCAGTCTCCCTCCCCTGACTCC	-27.3	280
TCTAAATAAAATTGATTTGATTGTATGCAGTACTAAGGAGACTATCAGAATTTCTTGCTATTGGTTTGCA	-21.7	487
CCGGAGGATCCGGGGCCTTGAGGAGGGACTCGGCTGAGCTCCTGCACCCAGTGTTTCTGTCAGTCTTTCC	-26.3	886
AACTGACATTATATATAACCAATTAATTTAAAGTATTGCCATTTAAATTACACACTGAGAGCATGTCCTA	-20.7	486
CGTACTCTATCTTCCATTCCTCGCCCTGCCCCCAGAGGCCAGGAGCTCTGCCCTTGACCTGTATTCCACT	-44.5	107
GGTCCCTGTTCAACACCCTCTTCATGAACACCTGCTGCCTGGGCTTCATAGCATTCGCGTACTCCGTGAA	-84	602
CCCTCATCCTACGTATTTGCTATTTTCCTGTGACCGTCATTACAGTTATTGTTATCCATCCTTTTTTTCC	-22.8	718
AGGGCCTGGTCCTTGCTAACTGCTGCAGGGTGGAGTTTGATCTGGCAGACCCGATCCTCCTTCATGAACA	-24.9	301
AACAGAGGATCTGACACAGACGTCTGGAAGACCATCCTCTCAGAGGTCCGCTTTGTGCACGTGAACACTT	-24.6	1602
TCTTGCACAAAAGTGATCGTTTTCTTCCAAACAATGTGAATTTAAAAGGTCACACAAAAGAAGCAATCGG	-22.6	324
GGGGGCCTCAACCCTCTCCTGGAGCGCCTGTGAGATGGTCAGCGTGGAGCGCAAGTGCTGGACAGGTGGC	-28.2	200
TACCTTATATAAAACCATCTTTAAAAACCAATAGAAGTGTGAATAGTAGAATATTAATTAAAATGGAGGC	-21.5	23
GTGGACGCCTCTTTCCTCCGGCTCTTCCCTTGTTGCTGCGAGAGCGAGAGGGCCGCGGGCGGCGGAGGCA	-50.8	530
CCGGAAGAACGGTGGGATGGGAACGAAAAGCAAGGACAAGAAGCTGTCCGGGACAGACTCGGAGCAGGAG	-24.7	570
CAGCCGTCCAGCTGCTCCTTTCCCAGTTTGATTTCAATAAATCTGTCCACTCCCCTTTTGTGGGGGTGAA	-25.9	14
GCTTTTCTTGTGGGCTTTCTGCTTAGTCTGAAAGGTGTGTGGCATTCATGGCAATCCTGTAACTTCAACA	-23.8	74
AGGACAGGACGCTGTACGAGCGGATCGTGTCTCGGCTGCGGCGATTCGGGACAGTGCTCACCGAGCACGT	-26.2	702
GTATACCATAGTATACAAATTAGTCAGTACTTGCTGTTAATTTTAATATTTCTGATTTAACAGTTAGTTA	-20.4	571
GCAGTTTGGCCTCTTTCCCTCTGTCTGTGCTTGTGTTGTTGACCTCCTGATGGCTTGTCATCCTGAATAA	-26.4	245
AACTGGCACGAGCACATCTCCATGCCGCTGCAGATAGACCTGAGAAAGTTCCGGTCCTATAAGGGGACAT	-24.1	284
GTGGAGTCGATTATAAGCTAGGAATGGCCGTTGTTTACAACGTCCGTGACTGGGAACAATGTTCTTGGGA	-21.4	117
TGTACGCAGAGGCGGTAGTGACACAGGCACAACTGACAGTGGCAGAAGCTCAGCTGACAAGGACTGGGGA	-27.1	623
GCATCCATTAACAATCGCAAAGGGAAACTTATCTTCTTTTATGAATGGAGCGTCAAACTAAACTGGACAG	-21.6	1003
AAATATCAAGAGAAAGATATCAATGCATCAGAAAATGGAAGTGTCATGGATGAAGCAAACTTAGAATCCT	-23.2	666
GGTTTTTTATGTTAACTTTGGTGACCTTTTGTGTACTTTACATGAAACACCTTATATATTAAGTACTGGG	-54.3	237
GTAACTATTATAACATCAAAAATCTCCGGAATGAGGAAAGTGTTCTTCTTTTTACTCAGATAAAAAGATG	-81.5	431
ATAACGATAAAAAAAGACTAATTAAAATCATGTTCACTTAACATTAAATACATGCCAGAAGAAATCATGT	-21.6	312
AGCCAATTTTAGACTCTTTTCAATACCTCCCCCCCATTTTAATTAGTATTGATCATATTCAGTCTTTCAT	-20.2	59
GAGGTGCTGAATGTAATGGATAAAAATAAGTAACAAGATGCCAACTTTTTTCCTTTGGGGTAAAAGGTAC	-32.9	2186
TGTCACGTACAGCATCTGTGGTTCCAGTCTGTGCTTGACATGCTCCGCCACTTCCACACACACCCCATCC	-24.6	487
GGCTATAGCCGACCCGCGGCGCCTTCCCCCCGCGTCCTATCGCGAGCGCAGCGGCAGCGGCCCCTGGAGG	-32.4	2586
TCAGTCTGAATTAAAATTAGACTTTGAAAATAAAGCTTAAATAGTTGTTTCCTCTAAAAAAAAAAAAAAA	-71.3	2
CTTTTTTACTAGAGAATTTTACTAGATATTTGTCATTCAAGTTTTCATCTGCTTTATAATTGATACACCT	-87.3	285
TCTGAAGGCCCACGTTTTTATCATTAAGACCTATTTGTTAGCTAGTAGAGCTTTATGTTCGCTGTCCATG	-23.7	245
CATCCGGAGGGACCCTGAGGCCTGCGAGAAGCTGGAAGCCACCATGCTCCGACTGCGGCGCGACCAGAAA	-28.1	359
CCCATCTTAGTGGCACGGTGCTTGGGCCTGTGTCCCCGGGTGGTGGAACCCTGTACCGGTCTGTGGCCCT	-28.3	326
ACAAGGAGTTTCCAGCTGCTGGCTGGAGTCTCAGGCCAAATTGCAGAGGGTCCTCCAGGGTCCTGAAGAG	-28	319
TCTTAAGAGCCTTTCTAAGAACATGATAGGCTTACTTCTGCTCCATAATAAAGTGGGAGAAAAAAGCCAG	-23.6	268
GTATATCTTCATCCCCTCAGACATCCGCGACTATGTGATGCTGAGATCGGCCATTCTGGGCGTGCCTGTC	-25.1	1124
GCCTTTTACTAAAATGTGATTGTTTCTATTCATTGTGTATGCTTCATCACCTATATTAGGCAAATTCCAT	-22	1122
GGTGGTGGCTGATGCTGGCAACCACTGCTTTAAAGCCTATCGCTACCTCCAGTAGCTGTACAGAGGCCCT	-26.7	399
TGAATTATAAAAATAAAATCTTTACCTGTCGAATTGTTGCTGCAGATGATTGTTGTGGAAAATCTGGATC	-22.3	381
GTCCTGTTCTGGCACATATGGTCCACTGGAGACAATGTATGATTGAGTTTTTCTTTGGTCTAAAAATTAT	-23.4	17
CCTAGAGGAGAACCTTCGGCGCTCTGACAAGGAGTTAGAAAAACTAGATGACATTGTTCAGCATATTTAT	-21.6	204
TGCCTGCACTGCGGTTGTCCACGGTCACATCTGCCCCAGTGCCTTTGTCCTTCCCTTGGGGCTTGCCGGC	-28	521
AATGATTTTGTCAGGAATTATTGTTATTTAATAAATATTTCAGGATATTTTTCCTCTACAATAAAGTAAC	-20.8	24
ACTTATGAACTTGGGAATACTTACTTAGGTAACAACTAACATCAGAGGTTTTTGATCTGTAGCCTTTCTT	-23.4	121
TAAATGATTAATGGTTGAAATTGTTTCTCTTCTTTTGTGTTTTCCCAGTTAATAGATGGTCACTGTTTCC	-23.7	225
TTCTGCAGGAAACGTCTCCACCCACCCCAGCTTGAGCCAACGGCCTGGAGGCTCTACCAAGTCGCATCCG	-28.5	7071
GTTGTAGTGCAGCTTAATTTCAATTCAGTCTTTACTTTGCCACTAGAGTTGAAAGATAAGGGAACAGGAA	-23.8	543
ATACCTCAGATGTCCTCCTGCAGCAAGTGTCTATATGTTGTGGTTATTTTCTATCTTACATGTTCTCGAA	-33	53
ACCCGTATTTACCAAGTACTATGATAATGGCTAGAGTATAAAAATGTTCTTTTTAAAGTTATTTATTAAG	-20.5	87
GACAGACTTGATTTGTATTTTATTTCTGATAAGGAATAAGTACTTGTTTCTGTTGTTTTGGACAAATAGT	-24.9	49
CCCATCCAGGACCTTCTATTTATATACTGTGAACATCCTGTCAGCTGCCCGAATGTTGTTGCACAGGTGC	-24.1	372
TCCTAACTATCACTGGTTTGGTTCTGGACTAAAACTACATTGACAGATTGAATTTGCCTAATATGATGAC	-22.1	82
GGTCTGTTTTGTGTACTTTTAAGACTTTGGTTATTTTACTTTTTGGAAAAGAATAAACCAAGAATTGATT	-22.3	1386
TTGCCAGGAGCACAGTGGCCACACCATAGTCTCCCTGGATGCAGCCCGCAGGGACAAGGAGGCTGAACTC	-28.8	1815
AATGGATGACCAGGAACCTTAAAGAGTGGCTGAAAAGATTGCAGAGTTATCATAATAAATTGCTAACTTG	-88.1	3
TTCAGAATAAAAAATAGGATAATTTAACCTACCAGCCCTTCTCCCCCAATAACTGTGGTCTATACAGAGT	-25.8	70
CACCCTTTTCTGAGAGTTATTACAGCCAGAAAGTGTGGGCTGAAGATGGTTGGTTTCATGTTTTTGTATT	-24.9	108
CCTTCTCTTTCGGTGACCCTGGCCGACATCTACCGGGAGCTCTACGCCTTCTTCGGTGACAGCTTGGCCA	-24.3	620
GTAAATAGTATAAAGCTATGTATATAAAGCTTTTTGGTAATATGTTACAATTAAAATGACAAGCACTATA	-20.4	483
AAAGCAAGAAAGCAGTCATGAGTGGTATTCACCCTGCAGAAGACACGGAAGGTACTGAGTTTGAGCCAGA	-26.9	1207
AATGAGAAGAGCTGGATGAGTTTAAATAACTCATTGTTCAGATTCCTGAACAGGAGTTGGGATAATGGCC	-23	342
ACTGGTAAATTATGTTATTTTTTACAACTAATTTTGTACTCTCAGAATGTTTGTCATATGCTTCTTGCAA	-21.3	345
TCTTTGCTAAAATCACAGAAAGACCCTATTGACAACATCTATGTCTGTAAAAATGTTAGAGTACTTGTCA	-21.3	276
ATTGGCTATGATGTTTGAAGACCAATCTTTAACATCTGATTATATTTGATTTATTATTTGAGTGTTGTTG	-68.6	694
CGACGGACTCTCCATTCCAGAACCATGGCCCAATTTGTCCGTAACCTTGTGGAGAAGACCCCGGCGCTGG	-55.1	1044
TCCTGGAGCTTCACTGGACATATTCTTTATGCCACACCTACCACGGGATAATAAAAGGGAAAATAATTTG	-23.5	694
ATGCCCTGCACTCAGTCACCCCGAGGGCTGAGCCAGATTCCTGGATGTGATGGACCAGCTCAGCTGTCCC	-30.5	268
TTCAAATCATGTTAGCTGTTAAAAAATGTATAATAACTCAGTTTTTCTTGGTTTATGGAAATATCTATAT	-21.3	83
TGGCAGAGGAAAACATTCTTATTTCTTTCAGAAGACATTTCTGAAATCTTATAAGCTACTTAAGCTACGT	-42.9	713
ATGGGCAGGCCCGCAGGAAGAGCCGGTAGGGGTGGAAAGGGGACTCAGATGAGACACACCCCACAGCTGC	-28	423
GCAGAAAGCCCAATGTGTCATTGTTTACTTGTCCTGTCACTGGATCTGGGCTAAAGTCCTCCACCACCAC	-23.3	132
CTGCTTTTGTTGTTTATTTTAATCAGCAGAGCACAGAGACACATAAAAACTCTGGGAAATGACTAGGATA	-33.3	355
TCACTTGTGGAAGAAATGCAAATGAAAACAGCCCTAGGGATGTTGACGTTGGGGTGGCACCTGCTGCAGA	-27.6	1324
TAATTCATTTTAGCCAAGATACTAATATTTATATTACTGTGTTTAAGAGACAGTATCCAACTGAGCCACT	-21.7	583
AGCGGCTTGAAAATGACCCCAACATCATCATCTGCTGGAAGTGAGGCTGGTAGTGACTGGATGGACACAT	-27.5	400
TGCCCCTCGGGGTGTCAGAAATTCTAGCGCAAGGCACTTTTAAACGTGGATTGTTTAAAGAAGCTCTCCA	-23.5	109
CCTGAGCTCCCGATAAAGCTAAAGTCCATCATCTGGCAAATTCAGTAAATTGGAGAGTACTTGCTTCTGT	-22.5	713
CCAAATGCAGCTTCATTTTCCAGATACCTTGACGCAGAATAAATTTTTTCATCATTTAGGTGCAAAAAAA	-59.7	3
AATGTGCCCCAAATGCAGCTTCATTTTCCAGATACCTTGACGCAGAATAAATTTTTTCATCATTTAGGTG	-60.2	190
AATCTGATCCCAGGGTTGAACCTCAGCGCACTTGGCATCTTTTCAACAGGACTGTCCGTGCTATCTCCAC	-27.8	2419
GGTTTATGTGGACAAGCCATTATACCACCAGACTGCAATGCCAGTTTCCTCTACTGCAAACAGTGTTCTG	-73.1	43
TGGCCCAGGGCGTTAAATTCACAGATTTTTTTAACGAGAAAAACACACAGAAGAAGCTACCTCAGGTGTT	-62.9	638
AATACTGTGTATTTATCACTAAAAAGTACATGAACTTAAGAGACAACTAAGCCTTTCGTGTTTTTCCACA	-19.6	71
GGTGAAGACCATGATACGTAAACGCTCCTTTGGGAACCCATTCGAGGGCAGCCGGCGGGAGGAACGCTCA	-31.5	3787
CAGAATACACGTTCTTGAAAAATGTTGTTAATCTCTATTATGGAAAAACTTTTTAGATATAATTTTCTAA	-20.3	41
AAAATATTGAAGAAATGTAGTGTGTGACATGTAAAAACTTTCATCCTGGTTTCCACTGTCTTTCAATGAC	-31.3	95
GCAGAGAAATGTGATCGCTGAGATGTAAAAAGTTTTTAATGCTAGTTTCCACCATCTTTCAATGATACCC	-22.5	115
CCAGTCGGCTCTTTTTCGCAAAGCCTTCCAGAAGTTTTCTGTGCTTATGAAAGCGTATGTGTGGCCTTTC	-23	42
GCAGGCTGTCATAGAGTTATGTGTTAGTCTCAGGAGTCTTAACTTTTGAAATATGTTTTACTTGAATGTT	-21	423
ATGGGGGCGGGGAAAATGGAGGTATGAATTTGGGGTAAGAGGAAGTGAGATCTCCGCTTGCAGGTCAGCC	-26.7	197
CCCCGAGTTGTTTCCTCGCTGATCGATTTCTTTCCTCCAGGTAGAGTTTTCTTTGCTTATGTTGAATTCC	-22.9	203
GCCCCGCGGCTGGTACTGCTGTTCAGCGGCAAGAGGAAATCCGGGAAGGACTTCGTGACCGAGGCGCTGC	-26.7	1070
TCCTAATATGCATGTACTTTTTCTTATCACATATATTTAAACTTACAGATGGAAATTGCCCAATGTGCAA	-22.5	76
ACAAGAAGGGGCTTTCCGGGAAACAGAATAATTTCGAGCGCAAAGCTGTGTACCAGAGGCAAGTCAGAGC	-25.2	1861
TAAATCAGAATGCTTAAAATCTGAATGGATGGAACTTAAAACTACTTTGTTGAAACATCAACCTGGGCAG	-23.2	362
TTTTAATTTGGAGAACCTACTTTTTTAAAAAACGGAAAGAAAATCTATCTTATTTTGTTGACTCCCAATA	-21.6	331
GAATTAATTTTTTAAGTGTGTAGATGCTTTTTTCTTTGTTGTTTAAATATAAACAGAAGTGTACCTTTTA	-23.2	961
AAAAACAAACATGAGGGGAAAATATCAGTTATGAGCAAAGTTGTTACTGATTTCTTGTATCTCCCAGGAT	-24.2	774
TTTTCTAGAACTTCATAAGATAACCACTTGATTTTGTGATTCCAATTCTTTGTAATTGTCTTCAGAGCAG	-21.5	158
ATGCCCTTTGGGAATGTCGTGTCTGCCAAGGTTTTCATAGACAAGCAGACAAACCTGAGCAAGTGTTTTG	-23.9	4998
TGGGACCCCGGCGAAGGGAGAGCGCGTCGCAGGCCAGACACGTGTGAGCCCTGTAGCGTGGGAAACTGAG	-26.4	463
AGCATTAGAATTTTGTCTTAAAATAACAGCGGTAAGTTTCACTTTTTATTCTGTATTGTGCAGTTACACA	-20.7	226
GGAGAAAGGTTACTGTAAACTGTGTTATGTTGGTGCTTCTGTGAATTAAGTTGTGGTTTCATCATGAGTC	-22.2	3120
AATATACCCAGGCCACAAGAGCCGAGAACTGTCGCCCTTCCACGATGTGGCTCCGTGCCTTTATCCTGGC	-34.6	1870
CAACTTTGCTCGCAATGGAAACCCCAATGGGGAAGGGCTGCCCCACTGGCCAGAGTACAACCAGAAGGAA	-84.3	327
GGCAGGGGACAGAGGCCATGAAGGAGCAAGTTTTGTATTTGTGACCTCAGCTTTGGGAATAAAGGATCTT	-104.4	37
GGAAGCCCTCGCCGTGCAATTCTGTATGGCTTCTATATAAATATTTAAACCTATATAGCGGGTTCTTCCC	-23.9	0
CACAGAGATGTCCAAACTGTCGTGCAAACCCAGTGAGACAGACCGCCAAATAAACGGACTCAGTGGACAC	-24.1	195
TTCCAGTGGTCCATGGAATGCTTGAAAAATGTGCAAAACAGCGTTTAAGACTGTAATGAATCTAAGCAGC	-22.9	236
AAGGCAGAAGGGTGATTATGAGTGGTTCACAGCAGCCCTTATAAGCTGGGCCAGAAAATTTCACTAGGTC	-24.6	347
AGCCCCACCACCCGCCAAGAAGCGGAGAGGACGACCCCCTGGCAGAACCAACCAGCCCAAACAGAACCAG	-29.9	1493
TAAAGGCCCATAAGACAAGTGATTATTATGATTCCCATACTCCAGATACAAACCATATCCCAGCCATTGC	-22	188
GACATCACCAACAGTCAAAGCAATTAGAGACCATACCTAATATTGTTTAAATTCTAGATGTAGGCTAACA	-21.7	81
CTGGGGCATCAATCATCTTTTGATAAATGGATCAGTTTTAGGACTTTCAGAAAATAAAAGATCGCTCTTG	-21.1	139
GATAGGACTTATAAACTATCCTGCAGAATATTGTATCAATATTTACTCTTGGCTCAAGGTCAATTTCATG	-23.5	818
CCCAAACCCTCACCGGTTCCCCCTCACCTGGTGTTCAGACACCCCATGCTCTCCTGCAGCTCAGGGCAGG	-27.4	214
AAGGATGTTACCTTTGACGATGACAGTGTTAATCCTGCTGCTGCTCCCCACGGGTCAGGCTGCCCCAAAG	-30.5	1554
GATAGATATGCACATCAAAGCCTTTACCAGTATCTTCCTGTATTCCGTATCAGATTGCAAAGACGGAATG	-22.5	43
ACCCTTGACAAGAAAAGACATACTGTCATGTATTTATATTCTAGCATAGACTAAACTGAATAAAAATGCT	-23.2	29
GTGTATAACATGAAGATAACATTTTGTCTTTGACCACTGTCTTTTGAATGGGCCCACAGTGTTTATGTAC	-60.1	498
GATCGCCTTAATACCAGAAATGATTAGAAGTGCTGATTTAGATTCAACAAATACCATATGTCCTTATCAT	-20.5	422
GGTTTGTGGCTGAAAGCTGTTGAGTGACTCATCGCCAAGATTTGCTGTAATGCAGGCTTTGATCTGTTTC	-23.9	3318
GAAAGCTTGTATATAATATTTTTTGCCATAGTAAGTGAGAAATTGTCCTTAATCATGCCTGTTTGATGGT	-28.1	610
CTGGAAGAAGGAGATGAACTCCAACTTGCAATACCAAGAGAAAATGCACAAATATCACTGGATGGAGATG	-23.7	164
GGAGGCAAAAAAATACTTAAAATAAGCAAAGAAACTGAACAGAATTGCATACATTGGGTTGTTTTTTCTG	-22.7	334
CAGCTACTTAATTTAGATATAATAGAGTCTGCAAATCACGGCATGTTCTCCATTTTTTCTCATCCTTGCA	-23.2	512
GTTTATAGAATTGAAGGTTCTTATCAGATGGGATACTGGGGACTATAAACAATGGAAATAAAGCCACTGT	-22.2	920
GAGCTCAGGACAGATAATCTTATAAAGAATAGACTTGCTTGGGTGGTAGTACGTTGTGCAATTTTGACTA	-20.1	125
GGACTGGTGACTGGTCTGTGATAGAAGCAAATTCCAATTCCAAATGTAATTAGACAAAAATCATTTTTTT	-21.6	54
ATGACCTGCGGGCAGATAGGGAGGTTGCCATCTATTCCAAAGAAAGCATCATATTTGGAGCATCCAGCGT	-25.7	2013
GGGAGCCATTAGAACACAGATACAAGAGAAGCCAGGAGGTCTATGATGGTGACGATTTTTAAAATCAGGA	-24	19
TTGGCTCGCTCCGTAAGGCAAGAGAACCCACTAGGGGATGAGCCCGAACTAGGGATGTGACAGAGCGCGA	-25	1127
CCGTCAGTCCACGCACTCCCGGATGCACTCAACAACCTAAGGACGCAGGAGGGTTCCGGGGATGGTCCGA	-27.3	660
TTGTGATTTCTATATAGCTATTAGAGATTATGACATAGTAATATTAAAATGAAATGATACTTAAACAGAA	-17.8	289
TGTGTTTTTGTATTTATGAAAATAGTTTCATTGTCATTTATTGGCGGTATACAAAGTAAAATGTTATAAA	-20.7	212
ATCTGGCTTTTGAGAACACAAACTTTTCCCCCACGGACCTCCCTTTATCACTTTAATAGTGACCTTGAGC	-24.8	722
GAGCCTAAATAAAATTATCATCAAGGTATTAAATATAAGACGTTAAATATAATAAAGTGGGGATATATAG	-20.1	588
CCTAATCATCTTACACCAAGAAAGTAATTTCTTTTAGGGGAAGTGTCAAGATAACAAGTAACCCTGTCCA	-21.1	672
GCTGCTGTAGTGTATGCTTCTCTGTGTCCTGATATATCAACTTATTGCTCATCTCCTTTGATGAATTAGG	-24	275
CAAAATCAACCCTTCTAGAAGATGAAATTTAGTACACTTTACATCTGACTACTATTGTGTAGCCTGAGCC	-21.4	209
ATAAATATAATATCATGTTAGTGAGGCTAAACTCAAAATGGGATCTCCGAAGACTTTGTAAAACTGTTGG	-34.5	810
CAATGAAGTAATCTCTAAACTTTATGCAGTACATCAAGAAGGAAATAAAAACGTTGGATTAGATATTGAG	-66.9	347
GACTCAAGGTGACTTGTTTCAATAGCAATTAATAATTTGTTGAAGACACTCGACTTAGCAAAGTACAAAA	-22	118
AACAGGGTACTAGGACTGCAGCCCCCTGTAGCTCCTCTCTGCTTACCCCTCCTGTGGACACCTTGCACTC	-28.3	252
GCTCTAGGCCACTTTACGCAACTCAATTTCTGAAGCAATTAGTGGTAAAAAGTATTTTTCCCCACTAAAA	-20.8	686
TGCACACCCCCCGCTCAAACAACAATGTCCTTATTATGATGACCATCTCGTAGTGGTACATTCCATTCCT	-22.1	502
GAACAGAAACAAGAAATTAAAGATGCTTTTGAACTATTTGATACAGACAAAGATGAAGCAATAGATTATC	-23.6	1012
AGTACGGAGATGGAGATTGGCTCCCAACTCCTCCCTATCCTAAAGGCCCACTGGCATTAAAGTGCTGTAT	-24.3	101
GCCTGCTCCATTAAAGACTGTGAAGGTAGAATGTTTGTAAAGCTCTTAACAGTATGTAAGCCTTCAATAA	-23.6	29
TTGAGTATCTGGGAGTAGTTGAAGAACAGATAATTCCTTCCAAACATCAAGCCTTGGGATTCTTGGAGCA	-22.7	578
GAAAATTCTGGTGTTGGTTGGAGTTCCATCTTGCAAGGGATAATACAAATCCTATGATCTCTATGCCCAA	-22	120
TTCTGAGAGCCTGGGTATTCAAATGATAAGATGGGTGTGTGGTGCAGGGACAAGACTTCAGTCAGAGGAC	-25.4	144
TCCGTGCTCTTCTTTGACAACAGCGACAACGTGGTGCTGCGGCAGTATGAGGACATGGTGGTGGACGAGT	-26.4	66
GTTTGCAGCCAAGGTGTTGACAGGCCAGGTGCACGAGCTGAAGGACCTGCGGGAGTATGACACAGCCGAG	-25.5	2524
CAGCAGCGATTCCGACCCGCCAAGTCTCGGCCTCCACATTAACCATAGGATGTTGACTCTAGAACCTGGA	-21.3	399
GCCCTCATGCTAGTCCCCAATCGCCAGCTTACTGCTGATTATTTTGAGAAAACTTGGCTTAGCCTTAAAG	-21.4	312
ACTTACACAGATCAATGTGTTCAGATTTTAACAGAGTTGCTGGGTCTTCGACAAGAGCACATTACCACAG	-25.6	1516
TTTAAGGGAAAGAAATGTTTCAGGAGGGATAAAGCTTACCATTAAAGCTTTTGGGTAGAATTCTGAATCC	-22.4	1345
TGACGGTTCTGGCCTTCCCAAACTGCTTTTGATCTTTTGATTCCTCTTGGGCTGAAGCAGACCAAGTTCC	-65.1	254
AAAGAGATTAGTTATGTCTGACATTTGAAGCTGGAAAACCAGATAGATAGGACAACTTCAGTTTATTCCA	-65.3	64
GATTGGACTTCAACACAATGTCGAGTACAGACCTGCTGAATGCACTGAAGACAGTAATTAATGATCCTTT	-89.9	388
CGTGGGGGAAGTAGAATACCAAGTATAATAGTTACATTCACTTTCAAAGAGCATCTATGAATTTGCCTTT	-22.8	686
ACTCCGTGTAACCAGTAACTACAGCCATTTACAATTGACTCCGTTTCCTTTTGTAGGTTTCCCTGTCTGT	-21.7	36
CTTTAACCGGATTGTGAAAGCTTCATGTATTTTAATTTAGATTCTGTGTTTTTAAGGGTTCTGAGCATGA	-21.8	364
CTGCTTACCTTGTTTCCTTTTAATTGATAAGCTCCAAGTAGTTGCTAATTTTTTGACAACTTTAAATGAG	-21.4	506
CTGGCACAGAAGACCCGGCGGGAGAAGAGAGCCCGGCAGGAGGCCGAGCGGCGGGAGAAGGCGGAGCGGG	-34	1019
GGAGAAGAGAGCCCGGCAGGAGGCCGAGCGGCGGGAGAAGGCGGAGCGGGCGGCCAGACTGGCCAAGGAA	-34.9	930
TATCTTAGCTAAAACTAGAGAATGCCCTAACTTAGATGGTTTTTGAAGCCTATACAATTGGTATTGTTTG	-64.1	280
GTATCTTAGCTAAAACTAGAGAATGCCCTAACTTAGATGGTTTTTGAAGCCTATACAATTGGTATTGTTT	-63.9	507
TGTTCCAGTTAGCTTTAAAAGGTATACGGTGCTAATTAGTAAAATATTGAAGGCAATATTTTACTGCTAG	-19.5	302
TGTATTGGTATTACAACCAGATTATATTCTTGACGTTGACTTCATTAAAATTATCTACAATTTCCTAATA	-20.5	10
AGTCTACTTTTACAACGCTTTCCCCTCATTCTTGATGTGGTGTAATTGAAGGGTGTGAAATGCTTTGTCA	-23.8	1391
GGAGATGTGAGTTTGTACACAAAACATCAGACTAGACCTTTGTATGGGAGAGAATTTACTGTACATTAAA	-21.3	214
GTTTTCTAATCCGACTCCTAATTTTCATTGATTAAAACTCCTTTCAGACATATAAGTTTAATAAATAACT	-21.3	415
CAGACATGCAAGCAAGTAGCTACTCTTCCACCAGTGAGCGCGGGCTGGACCTCTTAGATTCTACAGAGCT	-23.8	384
AAGCAAGTAGCTACTCTTCCACCAGTGAGCGCGGGCTGGACCTCTTAGATTCTACAGAGCTGGATATTGA	-26.3	2976
CTGGACTGGAGGGGGCCATGGGGCACCGGACCCTGGTCCTGCCCTGGGTGCTGCTGACCTTGTGTGTCAC	-85	1115
ACCATAGGTTAGCTAAAAAGATCATGATACAATTATTTTATTAAGTCATGGTTAATAACAAATGAATCCA	-20	562
TTCGTCTAGTAACTTAAGTGAGAGAGAAAGGGCAGCGCCACAGAAGCCCCTAAACGCCGCCTCGTCATAC	-25.7	536
TTCCCCCAGAAGATCAATGGAAGGTGGATTCCAAAGAGTGGGCAAGTGAGGACCCCTTCTCTGTTACCAA	-26.1	1109
CTTCCATCCCTCAAACTCACAGTCCAGAATCCAAGCTCTGTGGTCAGCTGGATCTTCCCTTTGCAGTGAA	-82.8	728
CATAGGAGAAAGATATGGGACATTTCTATAATCTATATTCTAATTTGATTCGATTATTGAGTCGTAAGTA	-21.5	200
GATTATACTTAATCTAATTTGATTAGATTATAGAGTCCTAAGTATTAATTATTGCCACCATCAAACTCAT	-78	141
AAAGTCACGGGAGAAAAATATGGGACATTTCTTGATTGTACTTAATCTAATTTGATTAGATTATAGAGTC	-36.1	243
TAGGGGCATGCATTCCATTGAGGAAATTCTAGGGAATTTTTATTTATTTTCATTGGTTTATTTCTGGTTT	-37.7	176
TTCCTGTAGCCAGGACCCCTGTTGAAGTCCATGGCACACCGATGAGGAGACCAGCGTCTGCAACTCGCCC	-33.7	2951
GAGGTGCTGTAATTTTAAATTGTCTCTTGTCTCCTTCAGTTAATTTTCAGAATTAAAAACATACCATGGG	-26.9	1155
GGGGTAAAAAAAGCTATTTTCATTGCCACAAAGTGCTTTGATGATGTAATACCTAATAAAGGGTAGGATG	-22.4	165
ATGTTAAGACGACTAGTGTTCTTATTAGTATATTGCTTCACACTGAAGATTGTGTGTATCGAGCTGTTTC	-23.1	99
ACCCGTGTGGCTGCCAAGGATGTGCTGAAGCTGGAGTCTAGACCTTCAATCAAAGCATTAGATGGGATAT	-32.9	461
ATGAAGCAAATATCTTTTATTGGAAATATGCAAATTCAATACTTTTCCATTATAGTCTATAGAACTGGAG	-20.5	484
ATAATAAGCAAATACACTATAATAGATCCACGTTACTGGAATCTGTAAACCTTGAGGGATAGCTTTCTGC	-22.5	935
CATGATGCTGGCTTTGACAATGACATAGCACTGATTAAATTGAATAACAAAGTTGTAATCAATAGCAACA	-24.7	799
CTGGGAGAGGAGAATGTGCATTTTTGACCTCAACAAGAATGGCAACTATTGATTGCATTCAAACGTACAA	-22.6	299
CGTAGCCAGTGTTTGACTTTCTTTTCAAGTGGGGGAAAGTGGGAGAGGACTGAGAGTGAGGCAAGTTCTC	-48.7	191
CGGTCCAGACCATTGTCAAACGCTGTGGTCTGCCCAGCAGTGGCAAGCGCAGGGCCCCTCGCAGGGTTTA	-30.4	1699
CAGACCATTGTCAAACGCTGTGGTCTGCCCAGCAGTGGCAAGCGCAGGGCCCCTCGCAGGGTTTATCAGA	-30.4	3668
TGGCAGCCACACCAATTCCTAAATTGTAGGGTATGCCTTCCAGTATTTCATAATGATCTGCATCAGTTGT	-22.9	373
TCAGCCCAGGACCCCTCGCAGCTCAGCTTCCGCCGTGGCGACATCATTGAGGTCCTGGAGCGCCCAGACC	-75.8	264
AGCTTCCGCCGTGGCGACATCATTGAGGTCCTGGAGCGCCCAGACCCCCACTGGTGGCGGGGCCGGTCCT	-71.5	1328
GGCTTGGATTAATATTCATAGTAGAACTTTATAAAACGTGTTTGTATTGTAGGTGGTGTTTGTATTATGC	-20.8	85
GCTTCTGGACCTTGACCTTCAGAACTTCTCTTGGTGTGGAACCATTACGCCCAGGGTTCACTCCCCTCTC	-25.3	299
GGAGGGAGGGACGATGGCGGTGGGTTTTTGTATCTGAATTTGCTGTCTTGAACATAAAGAATCTATCTGC	-27.4	6
ACATAAGTACTCATTTGTAAGACTTTCTGACATGTAACATTAGTTCCGTAGTTTTGAGACCTGGTAGAAC	-20.7	383
ACGCCATCTAAGTTTGTGATCCCAGTGTCATGTGCTGCCCCCCAAAAGTCCCCATGGCTCACCAAGCCCT	-26.6	723
GAAGAGCAGTGGTTGTCCAGCAAGGTCCTAGGTGCCTCCGTGGCCTTTCGTACAGTGGGTGGGAACATTC	-24.8	1511
ATGAAGAAGAGAATGATGAGCCACCCAAAGTAGTAGTTACCGAAGTAAAAGAAGAAGATGCTTTTTACTC	-79	1326
TGCAAAGGGAATCTCTTGCCTGCTCCATCTCATAGGCTAAGTCAGCTGAATCCCGATAGTACTAGGTCCC	-26.7	310
TCCGTCCTAAAAGCTCTGCGAGCCGCTCCCTTCTCCCGGTGCCCCGCGTCTGTCCATCCTCAGTGGGTCA	-28.4	5432
AACAGCAGTTTGTGATATAGCAGAGGTTTAAATGTACCCTCCCCTTTTATGCACTTCAAATAATTAAATC	-22.7	901
TTGAGACTTTGGGGTCTCTTAGTTTGGAGGTGTTGAGTGCATTTGTGCCCCTGCCTGGTTGAGAGCTTCT	-26.2	1487
CAGGGTCATGAACTTTTTTCTTTAGTGAAGGAGGAATACAATCAAGGGTTTTGTATTCAGAATGTTGTGC	-79.8	437
GATATGCTATCTGCAAAATATTCCTATTTTGTAAATAAATAAAACCATAGATTTAAAGAAGAAAGGGCAC	-22.1	519
GCTGTTCCTTTGAAAGCCAAGATATTATTTAAGTTGTAAAGCCAGCTAATAAAATGCCTTAGTTTGAGCA	-22.1	4249
CACCAGACTTGCTCATTTTTCGAGTTTTTAACTAGACTACACTCTATTGAGTTTAATTTTGTCCTCTAGG	-21.2	17
GGCTGGAAAAGTGCATTCCTTGTTAATAAACTTTTTATTTATTACAGCCCAAAGAGCAGTATTTATTATC	-23.4	62
GCAAATTTTAAAACATTTTTAGGTTTTACAGAGATTTTAACCTTTAAACAACAGATCTTTAAAAAACAGG	-22.2	603
ATTTTCTTTCTTATAGAGGCTTCTAAAAAGGTATTTTTATATGTTCTTTTTAACAAATATTGTGTACAAC	-86	96
AGTTCAGGTATGACAAAGTATAGAATTTATTCATTTAACATATTCACATTTAGTTTATGTTTCTGATATG	-20.9	457
GCCCCTCTTATGTGGGTATTACAGGAATCCTTCTACAGGAAACAAAGCACATTTTCAAAATTATCACCAA	-24.9	703
ATATTTAATATTATGCCCTTGGATCTGTTACTGCATCACTAGCACTTGTGATGCAATAGAACACTTCGCC	-50.5	179
GCCTCGGCCACCCGCTAATTGCATCTTTTCCCGGCGTCTCGTCTGCAGAGGGAGCACTATGTCTGCGGAA	-29.8	5035
GGCTGAGGACTTAAGTATTCACTCAACACTCAAATGATTGCTGCTGGTATTCTGTAAAAAATAAACAAAG	-24.1	583
TCTAATGAATGCTGTTGATTATTGATGAGTATGAAAAAGGTTTTAATCAGTGTTCAACTCTTATGCTACA	-21.4	169
TGTGGTAAGAGGTTCAGCTGGCGATCAAATCTTGTAAGTCATCACAAAATTCATGCTGCTGGTACATTTT	-31.3	67
GGAAATGACTTTGCTGAATTCTCAAGCCTTACCAAACACATCAGAAATCTCACTGGAGAGAAACTGTATG	-23.2	582
GGAAAAAAGATTTCCCATTCACTTGATATTGTTTGTTCACTCATTTAGTCATTAAAAGTGAGATTAATAA	-21.4	388
CATGGACCACGGAAGTCGAGAATTAATGTACACCTGTATCATGTGTAGGAAACCAGAAATGTGTTCCTTA	-21.6	587
CATCTGTGATTTGTCCTCTGCTTATGGGATATGTTTTTCCGCTACTGAGTCTGTGTAGTAAATTTTTGAC	-26.1	51
CTCATGGGAGCATCAAGAGGATTTTCGAGCATAGCACCTGTCATTGTACCCACTGTCAGTGGATTTCTTC	-24.3	342
GCAACACACAGAAGAGGACCAGCAGAATCTGGACTTTTGAAAAAGAAAAAATCTAACTGAATAACAACAT	-23.4	183
GATTATTTTAGATAGTGATATTATAGTATTCATCTGTGTGTAAATTATTTCATATAGGGAAGAGTTCTGA	-20.5	696
GTGCCTACAGAAATTTCTTGGATTCTGTATCATCTGGATTAGGAAATGAATTTGTTTAATATTTTTGTTT	-21.2	806
GAACATCCGTTACCGGATCTGCGTGGGGCTGGTGGTGGTTGGTGTCCTGCTCATCATCCTGATTGTGCTG	-31.6	319
TATGAACTTAGATTTTTAAACATGTTTTAACATGTTAAGACTTGTGCATTCAGTGAAGCGTTATTATGCC	-31.7	412
ATAAAGAATGGAAAAGTCATTAATATCTGCTCATATCTTAACATCAGCGAGTTGGTATTTAATAAAAGCA	-26.4	1714
TCATTTTTCAGTCTTACAGAAGATTGTGTGAAGGCTGACTATACATAAAGTGACTGGAATTTTAACAGGT	-22.2	692
AGTGGGGGCAGTTGGACGTGACCCAGAGGGCCTTGTACGTGGAGGTGATGCTGGAGACCTGTGGGCTTCT	-50.2	1545
GGAGTGAACATCTTATGAATGTACCAAATAAACCACAGCTGGACTGTTAACCTCACCTTAGAAGCTTCTT	-22.8	42
TGGCACGCATGGAAAGAGTTTGAAATATATAGATTTCACTAGTGATTATGCTAGAAATAATCCTAATGGG	-20.9	107
TCCCCATTTTAGTTTTCTAGGACTGAAAGGATTCTTTTCTACATTATACATGTGTGTTGTCATATTTGGC	-25.8	312
AAGAGCGAGAAGTGCTGAAGTCTAAAGAGCTTGGGGTAGCCACTAATTAACTACTGTGTCTTCTGTGTCA	-45.3	774
CTACACCATTTTCATTCCAGTGCTGAATCCGTTGATTTATAGTTTGAGAAATAAAGATGTAAAGGATGCA	-22.5	39
TGGTTTTCGAAAAGGAGGAGAACATTTATATAACTTTGTGATTTTTAATAATCAGGACTATTGGCTTCAG	-26.2	161
ACCCCAGTGTTTTACATATCTGTTTAGGAGTGTCTAAGTTTTGTCATCAATCCAGGATGTTATTCTTCCT	-21.3	389
GTCCAAGCATTTAGATGTATAGGTTGATGGTGGTATGTTTTCAGGCTAGATGTATGTACTTCATGCTGTC	-21.1	543
ATCATGGTCGTGACCGCTGCCTTTTTAGTCAGTTTCATGCCATATCATATTCAACGTACCATTCACCTTC	-22.2	397
GCTACGTGCCTCCCGAGAAATTTGTCTTTTTGTATAAATGACAAAGTGTTGAAAATGTATTTCCTGAAAT	-22.6	25
TCCTTATATAGAAATTTTAATTTTGTAAAGTAGTGTATAATATTGTAATATTAAATTCTTGTTCTTAAAT	-19.3	128
CCTGGAAATGTGTAATACCTTCTTTTTCTATTATGTTTGTGGACTAATGTGATGATTGAGATGTTCTCAC	-22.5	2591
AATGAATGAATGAAGAAATTTGACTTATTTTTAAGGAATGTCACGATAGTGCAGAATACCTGGAAATGTG	-22.4	178
GGCAACATTTTAAAAGCTTTTAACTTAGAGATTAGGCTGAAAAAAATAAGTAATGGAATTCACCTTTGCA	-22.9	172
CCTTACCTGGAAAAACATGCGATGTTAGTTTTAGAATTACACCACAAGTATCTAAATTTGGAACTTACAA	-20.8	350
CAGAAATGGCTTGAAGTTATGTGTTTAAATCTGCTCATTCGTATGCTAGGTTATACATATGATTTTCAAT	-20.4	67
CTGTCAGGTCCCAGTTGCCTTTCTGACGGCCCCCCTCAGAGGGACGGCGATGAGCACTAAATGCTTTTTT	-39.4	106
TGTGCTATGTGCCCAGCCCGGTGCTGGCTTCCGTGGGAGACACAGATGACAGATTTGAAGATCTGGAAGA	-28.5	1874
TCTGTCAGGTCCCAGTTGCCTTTCTGACGGCCCCCCTCAGAGGGACGGCGATGAGCACTAAATGCTTTTT	-40.9	92
GTGGAATGGAAGAAATGTCGATCCTGTTGTAACTGATTGTGAACACTTTTATGAGCTTTAAAATAAAGTT	-21	543
AGGCCATGAAGAAGATGTACAAGGCGTGCCTCAAGTACCCCGAGTGGAAACAGAAGCACCTGCCTCACTT	-26.3	236
GACGACGACACCTCGCTCACCTGAGCGCCGCACCGCTTCAGGGACGGAGACAGGACCGGGCGAGCCCTGG	-28	121
GTGTTGAGATGAGCACCAGAGCCAAGAAGCTGAGGAGGATCTGGAGAATTCTGGAGGAAGAGGAGAGTGT	-25.7	1320
TCCTCCTTATCCTACAGTACAATCAGCAGTCTAGTTCTTTTCATTTGGAATGAATACAGCATTAAGCTTG	-21.6	31
TTACTAAGGATACTATTCAAAAATTAACATTTTCATCTCAGTAAGTTTTTAGAACATCAAAATGTTTTCT	-20.4	301
GAGCCGGGGGTCGGCCGGTCCTCTACCAGGTGGTGGCCCAGCACAGCTACTCCGCCCAGGGGCCAGAGGA	-31.1	247
GAGGCCCCCTCTGAGGAATCTCTTTGCAGTTACCTAGCCCCAGGTGAGGACGGGCACTGGGTCCCCATCC	-30.3	680
ACCACACGTCACAAAAAACAGCTGAAGAAATGCTCTGTAGATTGAGTTGCTGGAGGAGTGACAGCCAGGA	-26.7	232
TTTTATTAGGTTAAGTCTCAATTCTGAAGGGGAAAACCTCAGTTGGCCTCTGCCCCTCTTCCCTGGCCAG	-30.4	52
CTGTGCCCTCTCACTGACTTCTCCCGGGTCGTGTCTTTTAAAAACTCCTGTTTTCACACCTTACAAAGCC	-24.9	198
AAGGGTTCCTGTGATTGCGTTTAGCGCCCTCCCGTTCTGTCCATTTGTCTTGTCTGCCGACTGTCCGTGT	-25	464
CTTTGATATCAGACGCCCAAGTTTAGAACACAGGCAGCTTAATTACATACAGGTTGACTTGGAAGGTGGC	-22.2	262
TCAACACCACCATCTGTGCCGGCTACTGCCCCACCATGACCCGCGTGCTGCAGGGGGTCCTGCCGGCCCT	-60.5	299
TGGAGAGGTATAGATGCAAAACTATAGGAGTCTTTAGAAGAAGCAACCAGCCGGACTGTCTTGAAACGCG	-23.3	473
TCTATGTTTCTCTGACTCAACCTTTGACACTTAGAAGGTAGCACACTTCCAACATATCCTTCCGTCTTCC	-22	417
CCATTTTTAATAACAAAAATATCCACACCCTTTTAATAATGCTCAGTTCTGTAGGCTCTCTATCCTAGAG	-22.3	687
GTCCATCTTCAATATGCTTAAAGAGAAGGGTAGGAGATAAGGAGAAAGAACAGATACGGTTTTTTTCCCC	-22.1	233
ATGTATTCTTTAGCATGTTTTTGATATAACTTTTATCCTCCAGATCTTAAGCTTTCTTTTGCTCTCTTCA	-22.8	224
CTTGTCTGTGCATTCATGCATCTACCTCATTCCGGTTTTCTTTCTAATCTCATGTATTCCTGTTGTGAGG	-21.9	125
AGCTTCCTGTCACATATCCTTGTCTGTGCATTCATGCATCTACCTCATTCCGGTTTTCTTTCTAATCTCA	-23.3	1489
CCTAGGCCCCCCTACCCAACCCCAGGACAGCAGCTTCCATCTATGAGAAGTGGCTTCTTAGCTTCCTCCA	-33.9	305
TGGGGATGGGGAAGGACATGAAGCCTGAGCCAGAGAACCAGCTATAAGTCCTGAGAAGACACTGGTGTCT	-64.1	190
AATGTCACCCAGAATGACATAGGATTCTACACCCTACAAGTCATAAAGTCAGATCTTGTGAATGAAGAAG	-83.2	1181
CACGTACAACAAGACCGACGTGGCCGCTCCCTTCGGAGGATTCAAACAGTCTGGATTTGGCAAAGATCTA	-25.6	283
GTGAGTGAGTCACCGGCTTGGCGAGGGTCTCCTCTGACCCACTTAGCCTTGCCAGCGCTCAGAACTGCCA	-28.1	528
ACGCTGGAAGGATAGCCTCGCTTCCCAGGTGCAGCTCCCGGCAGGTCTGGACAGTTCCACAGAGCACGGT	-27.9	170
GTCACAACTAAGAGTGATAATTTGGTAGCTCTGTATGTATGCTGGTTCCAACTGTTTAATCCCTTCTGTC	-23.7	140
CGCTGAGCGGCCTGGAGGCCTTCTCTTTCGACTACATCGTCAAGTGGCCCCTTTCGCTCATCATCAACAG	-29.4	976
CCTTCTATAATGGTGGTACAAGTTCTATATTCATTCAGTTTAATCTCATTTGAAATTGTTTAAATCAGAG	-21.5	578
GGCAGGAAACTGGAATATCGCTTTTAATAAAATGGAAAAATATGCTTCTACATATTTACCACCATAGGCG	-21.5	575
CTGGATGGCCTCTGCTGAGAGCCAGCCGAGACCTCCTGGATCCTGCAATGCGGCATTGCTAAGGTCCTGT	-27.8	343
AAGGGCTGGAAATCACTGGGGACAGGAAACCACTTCCTTTTGCCAAATCAGATCCCGTCCAAAGTGCCTC	-25.5	273
AACCAGTCATTAAAGGAGCTGTTTCCTGGGTAAATCTAGAGTGGGGTTTTGGTTCTTTATTTTCCCCTAT	-24.5	1182
ACTGCCTGCTGTACTCAGCTCTACCGAAAGCCACTCTCAGACAAGCTACTGAGGAAGGTCATCCAGGTGG	-25.5	258
GCTGAAAATTAAATTTTAGATCTTTCAATACTCTTAAATTTTATATGTAAGTGGTTTTTATATTTTCACA	-21.6	51
ATCGGGCTGGAGACGTCACTGCGCTACGCCATCCAGCTCATCACAGCTGCCAGCTTGGTGTGCCGGAAAC	-34	288
AGGTAACAGTTATTCTGTTGTTATAAAACTATACCCACTGCAAAAGTAGTAGTCAAGTGTCTAGGTCTTT	-22	435
CTTGTTCAGCACCTATGTCATGGGGCGGATGGACACATACTTTGAGGACCCGCTGACTTTCAACCCCGAT	-27.5	896
CCCGCCCACCTCTGCTGCCCACGGCCACCCACCCTTCTCCCCTGCCCCGTCCCCTGGGCCACCCTTCACG	-68.1	524
CAAGCCACGAATGAATGAATTAGGAAAGAAAAAAAGTAGGAAATGAATGATCTTGGCTTTCCTATAAGAA	-22.3	330
CATGTGGATGATGTAACCAGTCATCAGTACATTTCTGTAAAGCAAAGCACACTTTTAAAAACCAGCCATG	-22.9	76
AAAACATCACACTAATCTTGGAGGAATAAGAAAAATTGTACATCCATTAAATGTACAATTGATTGCAACA	-22	543
ACCGCCCTCCTGCTGCCAGAGACGAGGCAGGCACAGCTGCCAGAGACCATCCAGGACGTGGAGAGAAAGA	-27.9	869
CCCAGAGCGGAGCTCGAAGCACCCAGGTTGCCCACGGAAAATCCAATAAAAAGACACCAGTGTGAATCCA	-26.2	485
GCTAATTTCAGTGCTTCTGCTTGGTTGTTCAGGGCCATTTCAGGTTTGGGTGTTTTCTGGGGATGTTAAC	-31	800
CAATTACAATCAAGGCAGAAATGATCTCATTTTTACATTACAACTCTGGAAAAGGCAATAGACTGAGATG	-24.7	2363
AAGGCCTGCTGCTGTACCACACCGAGAACAACGTGGGGCTGAAGAACGCCTGGAACATCATCCAGGCTGA	-25.7	1398
GGAAGCAGCCTCTGGATGCTGAGTGGAGGGAGCCACTGAGCACAGCAAGGCACCAAAGCCCCTGGAGAAA	-28.4	1375
ACTCTCCTGTGGAGAGGCCCCCCAGGGCAGGTCACTCTGAGCACCACCCAGACCTAGGCCCTGCAGCTGA	-30.7	1009
TGAATGTCCGCTATGAGTCAGTACAAGCAAGTTCACCTGACCTCTCAGCTGGGACCGCTGTCAGCATCAT	-27.8	1526
TACTCAGCGCCACAAAGAATGACATAGGACCCTATGAATGTGAAATACAGAACCCAGTGGGTGCCAGCCG	-54.1	1610
ATGAGTCAGTACAAGCAAGTTCACCTGACCTCTCAGCTGGGACCGCTGTCAGCATCATGATTGGAGTACT	-45.3	1516
CCGCTCCTGGCAGGCCTCGTGGCTGCTGATGCGGTGGCATCGCTGCTCATCGTGGGGGCGGTGTTCCTGT	-29.9	253
TAAGCCTCGGGCCGTCAGCAATACCTCTGAGTGCCCGGATGCCCTCCCTGCACCCTTCCATTTCTCCAGG	-28.8	217
CCCTGCACCCTTCCATTTCTCCAGGAGCCTGGCACTGCTTCCTCCACCGTTTTCACAGGGAGAAGCAGGT	-48.1	324
CTCAGAGGCTAGTATGGGGCTAGATGAAGCCCAGAGTAACACCCACAATATAAATGGGTTCCAAAATGGC	-23.3	183
CCCTGTGTTGTCAATGTTCTCAGTTGTAACAATGTTGTAAATGTTCAATTTGTTGAAAATTAAAAAATCT	-21.6	307
CAGAACATGGCAAGACTACAAAGCAGGCTTTGGAAACCTCAGAAGGGAATTTTGGCTGGGGAACGATAAA	-25.4	817
CCCCGCTTACATTTATGTGTCAGTGTTTTCCAACTACTTAGAGTTTATGTACCTCGTGATTTCTTGATAC	-23.4	388
GATATGCCTGTTTTTGAGAATTCCAGAGCCAAGAGTAATGGCATGCGGTTTAAGCTCCATGACACATTGG	-28.6	713
GTGTAAATTGGGATATAATGCGAATACATCAGTTCTATCATTTCAAGCAGTGTGTAGGGAAGGCATAGTG	-63.5	259
ATTGGGATATAATGCAAATACATCAATTCTATCATTTCAAGCAGTGTGTCGGGAAGGGATAGTGGAATAC	-62.2	265
TATTCTCAAAAATATATTAAAACAAACTAAATTATTGCTTATGCTTGTACTAAAATAATAAAAACTACTC	-60.6	335
AATTCCAAAAGTGCTGAGCTTTGGGGAGAAATAATCTTAGAAAGAAATTGTAGAAAAAACCCATGCAGAC	-24	43
GTAACAGCATCTTTAACACAACTCTTTGTTCAAATGTACTATGGTCTCTTTTAGAGTCAGACTCCTAGAC	-22.6	110
GGCCTCCAGCACAGATGGCCACAGGCCTCTCTATACACATTTACAGAATTTCACATAAAGGTTTACTCTG	-27.6	6
TTTGAGTACGAGGAACACGGGCCTTTCTTCCTCTACAGAAGGTGCTTCTGAACAGCGACGAGGATGGACA	-24.4	106
ACCCCAGCCTGGGGAGAGGTCGCGGCGGCGGGTTTGCTTCCTGCGCTCTGAGATGAGCTGCCCTCCGCTC	-29.7	126
CCCACCCCTGACGATGCCCTGCCAAAGCAGGAGGGCACAGCCAGTGGGTGCACTGAGGCGCACGACTTCC	-27.5	417
GCTGATCAGATAGAAGTTGTTTTTAGAGCTAATGCTATTGCAAGCCTTTTTGCTTGGACTGGAGCACAAG	-23.5	569
TAACTGTTTATACTTTTCTGAATAAAATAGTTGTTTCTAATTAAAAAGTAGCCAAGCTAAGATGCCTGGC	-23.4	334
CATTCTTAAACTCTTTAACGAATTCATTCAGCTGGGCTCTGATGTTGAACTTATATGCCGGTGCCTCTTC	-25.7	1234
CTACCCTTTTGCACACTGGCTGGCATTCGGCAACAGCAGTGTCAATCCCATCATTTATGGTTTCTTCAAC	-25.2	567
CCGTCAAGTACTTCAAAAAGATCATGTTGCTCCACTGGAAGGCTTCTTACAATGGCGGTAAGTCCAGTGC	-23.8	69
GACTTTGAGCAAAAAGTGACTTCTTTTTGTGAATGTAAAATTTGTGAAACTTGAGTTTTTCCAATGTGCT	-22.7	58
CCCAGCCCCAGAACAGCCACTCCCATCTATGTGGAATTTCTATACTCTGATGCAAACATTTACTGCCAGA	-29.3	387
AGACCCTGACAGGTTGCCCTGGGCTCTGGGTGGGCCGGGACAAAGGCCTCTCATCACCACAGGAAGCGGG	-52	224
CAGCATTGCCAAATAATCCCTAATTTTCCACTAAAAATATAATGAAATGATGTTAAGCTTTTTGAAAAGT	-31.3	481
GCTCAACTGCATTTCAGTTGTATTATAGTCCAGTTCTTATCAACATTAAAACCTATAGCAATCATTTCAA	-21.9	2118
GACCTAGAATAGCCATGTACTATAATGTGATGATTCTAAATTTGTACCTATGTGACAGACATTTTCAATA	-21.1	275
TATTTGTGTATATGTGTGTATACATATGTTTATCTCACACACATTATGAGCTTGAATTCTTAATTCATCC	-30.4	864
CAGGGAACAACTGCGGAGATATTAGTGATTCATAGGTTTGTACAGTGTTTTATACTTTGCAAAGCACTTT	-22.8	441
TCATTTTCTCTAATATGGCAACCATTATAACCTTAATTTATTATTAACATACCTAAGAAGTACATTGTTA	-20.5	130
TGTGAAGGCCTTCCCTTTTACAAACAAGAATCAGCAGAAGGAAATGATCGAAACCAAAGTAGTAAAGGAG	-23.4	618
TCAGCAGGACCCCATTGCAGCAAAGACGAAGTAATGTAAGCCACTGCTTCTGTCGTATCGCCTCATCAGG	-24.5	203
GCAGTTGTACTGTTTGTATGTTAAACTTGATACATTTAGAAGTTAATGTTAAAGCCTAATCCTAAATTTT	-21.1	161
TCTGGGAGCTGCAGCCTTCCAGCCCCTCATCATATACTGGCTGACTTTCCACCTGGTCCGGTGACCCCCT	-27.8	566
GTGTCCGTTGAACTGGAGTTGCAGACTTTTAAATAGATGACCCCTTCAGATCATCTGTGCCTACCTCCTG	-22.6	708
AGAGACCCTATCTCAGACAGTGAAAGTGAAATGGACTGATTTGCACTCTTGGTTCTTTGGAGCCTTGTGG	-22.6	309
TAAACAGATCTTCTACATTTATATTTTTAATCTTCTGTTAAATACACTTTCCGATATTGCCTTGCCTTTT	-20.8	349
AGCTGAAGCCAGTCTGAGCTCGGACTCCCAGCGCCTGGGAGAGGGCACGCGGGACGAGGAGCCCTGGGGT	-29.4	1050
ATTAACAACTTGCAAATGAGGTGCAAATAAAATGCAGATGATTGCGCGGCTTTGAATCCAAAAAAAAAAA	-88	2
TGACCAAGACCCTGGCCATAGAGCTGGCCCCAAGGAACATTAGGGTGAACTGCCTAGCACCTGGACTTAT	-85.4	1171
CTAGAGTTTGAATCTCTCCCGGAACTCTGACCTAGAGAGGATCCTGGTACTTCTTTGCCATGTCCTCATT	-25.1	276
ACACCCTATCTCCTCTGTATTTTTGTAGTGGAATTTCTATTTAAGGGGCTCATTAAAGCATAGTATTTAT	-22.6	752
CGTTCCTGCGCATATAGACTGTACATTATGAAGAATACCCAGGAAGACTTTGTGACTGTCACTTGCTGCT	-23.1	283
TGAACTTGGCAGGAGCTGGCTGAGATGATTTTTCTGCTGATGGTGAAATGTGCTGGCAGAGTCTATACAG	-27	586
TACAACTATAATTGTAGTTAATAACTAAAACCTCTTGAAAATGTCAAAGAAATACTTGATTTCTGATGCA	-22.4	290
GGCACGTTTCAGTGATTCGCCCTCCTCAAAATCTCTACCCAGAAAACATTGTGCCCTCTTTCTCCCCTGG	-25.5	980
CTCAGGAAACTTAATGAATAGATTACTGATTTTCCTAGTCAAAGTTAATTCTTACCCTTGGAGTAAAACG	-21.7	556
AAGCGAGAAGGGCAGCGCGAGGTGGGCGACTACCAGAGCGAAGCGAGCGGCGTGTAAGCGGGGTGAAGAC	-29.4	468
TCTGGCTTCACTGACTTGGCAGAGATTGTGTCCCGGATTGAGCCCCCCACGAGCTATGTCTCTGATGGCT	-26.4	393
CTGTCAGTAATTTATTAGACCTGGCAGCTTTGGGTGAGCTTAGATTTTTCACCTTCAGTGTTACATTGTG	-24	74
TTTAAACAGATTATTTCAGCAGATCTATTCAGATGGTTCTGATGAAGTGAAACGTGCCATGAACAAATCC	-77.5	521
TCTTTTGGCCAGAATCTGGAAACCATACAAGAAACGTGAGACTCCTGATTGCTTCTGGAAATACTGTGTC	-24.7	1096
GGATTTCTCTGGACAAGATCCTAACATTTTACTGAGTCATCTTTTGGCCAGAATCTGGAAACCATACAAG	-24.7	1101
TAGAGCGCGGCTGGCTCTGTGGAGGGGCCCTCCGAGGGTGCCCGAGTGCGGCGTGGAGACTGGCAGGCGG	-29.2	794
GGGAGCTATTCCTTATATAGTTACAAATTCCCTTGTCATTTACTTATTTGGAAACATGGGATTTACTCTG	-21.2	254
AAAAATCATTTCTAGCAAGCACTTGACATCTAGTCAGCTCTCTACTCCTTTATTTTGTTTTATCAAAAGA	-26.8	808
CTTTTCCCCCTTAGGCTATGCATTAATCGAAGCTTTCTTTTCACCATGACTTTATAATGTCTAGTAAACA	-53.2	671
GCCTAAGAGAAGATTTATGTAGTAATTTCTTCTCAGGTATGGAACCACGGTCATAACTAACATGTTGGCC	-20.4	449
TCTCACATTTGGGCTCTTCGCTGGCCTTGGTGGAGCTGGTGCCAGCACCAGTGGCAGCTCTGGTGCCTGT	-29.4	350
CGTAGAGCTGCCAAGCTCCAGTCATCCCAAGAGCCTGAAGCACCACCACCTCGGGATGTGGCCCTTTTGC	-29.3	1308
TTGCTTATTCCACATTAATTTACTTTTCTCTATACCAAATCACCCATGGAATAGTTATTGAACACCTGCT	-21.7	321
CGTGTTCCCCATCCTCAGTTGAAGTTTGATGAATTGAAGTCGGGCCTCTATGCCAACTGGTTCCTTTTGT	-23.2	26
GATACATGATACACTTTGTACAACTATCCTGCAGCCCATTGGTTGCTTATATTTATCGCTTGGCTCAAGT	-24.2	303
CGATGCACACACCGCACCCCACCACTGTACTCTGAAATTGGCGAGTGAGTGGAGAGCCAGCTCTGCGGAG	-72.6	256
GCTGCCCCAGGCTTTAGTGCAGCTGCCAACCCTGTTAGGCCTGGCCTCTCGAGGCCTCTTCTGACCTCAA	-96.8	373
TTCCCTGTGTTTTGATTTCTCATTAAAGTTCCTTTCCTTCCCCGTTGTGAATCTCAGTTTTGGGACGGGG	-25	805
GTTCAGTTTTTACTTCACTCTTTATTCTTTTCTTTGATTATGGTATGCTTATTTGGAAAGTCAGTGAAAC	-26	316
ACTTATATGAGAACTACAATCACCGAATCTACTGTATTCAATATTAGCAGATCTAATTTGATAAACAACA	-27.7	2319
GATAGATATTTTTCAAAAATACAGTGATGTCATTGCAGGACAATTTTATGGACACACTCACAGAGACAGC	-25.3	799
TCAATTGGTTCTATTGCATAGTACATGAATCTATTGTCACTAAAAATTAGGTTACTAATCTTAATTTTTT	-21.4	172
TTTCTACAGAATTGAATACCTGTTAAAGAAAAATTACAGAATAAACTTGTGACTGGTCTTGTTTTACATT	-62.6	1166
TGTTCATGTTTCTGATTTCTGTACAGATAATAGTGCATCTCAACCAAAACAAAAGTCAGATCCTGTGCTT	-52.8	663
GTGTTTTTCCATCATTAGTGCAGTTGGAATGAATGTGTATAGGTCAGAGGTCTTCGTGTTCACATTTTAA	-22.3	349
TCAGCACAGCCAACCATAATCAGCATGTCTGGGATAGACTGGTCTAGAATAAAAATGAAGTTTCCATTGC	-22.8	261
CCTCCAGGTCTAAAAGGTAGTGTGACCCAAATTTGTATAAAGATTTTTCATGTGAAAGGACTGGGGTTTT	-26.3	891
GAGAGAAATGCAACCATACATGGGCTCCAGTCAACTATGGGACTGAAGGTCCTAATTGCTCACCCAAGGG	-22.5	277
TTTGAAGACACATGAGGATATTGTAGCCCTTTTTCCTGTTCCTGAAGGAGCTCCCTCAGTACACCACCCC	-26	1523
ATAGACGCAATGCATTGTGTAGCTAGTTTTCTGGAAAAGTCAATCTTTTAGGAATTGTTTTTCAGATCTT	-78.3	24
GCAGTTAATGAAGTTGTGGCAGGGATAAAAGAATACTTCAACCTAATGTTGGGCACCCAGCTACTCAACA	-66.5	266
TCTTTGCTGAAGTATTCATTGTAAAACATACAAAATAAACATATTTTAAAACATTTGCATTTTACCACCA	-23.7	0
GGATCTTATGTAAACAGTTTTTGTTTCTGATAGTAATGGACTTTATTCTAACTTGAGATCAGTGGCGGAT	-20.3	135
TTGCCGGGAAGTCACTGTTGAAGTTGCAGTGGCTTGTTCACACCTGTGGGAAGAGAAGTGAAGACTTTCT	-25.9	51
AAGGGATGCTTTCTCTTTGTCGCCCACTCTTCATTCCTGTTTCTCCTCAGTTCCCCTGTGCAGATGGGCT	-25.6	35
AAGACTGTGGCATACCACGAAGCAGGCCATGCGGTTGCCGGCTGGTATCTGGAGCACGCAGACCCGCTTT	-53.6	1157
ACACTCATGCAGTCACGTTGTCCACCTGAGATTCTCAACAGGGTATAAAAGGAAGGTCTCATCTTGCCTC	-23.2	456
GGAAGTGAACCTAAACACAATGACAAGTGTGGATTTGCTTAGCGCTTTGAGAACAGTCATTAATGAACCT	-23.4	399
CTGAGTAGTGTAGTCCTATTAATTCCAGACAAAAGGAGTTTAACAAAAACACGTCTCCCATCCTGTTTCC	-22.2	157
TCTCCCACTCCTGGGGCCGGTCTGAGCCTACCTGAGCCCATGCAGCCTGGGGCCACTGCCAAGTCAGGCC	-29.1	298
GTGGTTAATAAGGATTGGTTGATTGAAGATTGAAAAGGGTCAGCTGGGAAAATTTTTAAAAAGACTGTTT	-23.3	81
AAAAGGTTTAGTTTGTACTCGGAAACCACAAAGTAGTCTCAAAGTATTTTAGAGGGAATCGATATTGATG	-64.4	378
TGATACCTTTATCCTCATTATCTACAAATGAGGAACAGGCTTACTGATAAGAAGCTGAAACAAGAAATTC	-21.7	87
ATTTGGCCAATTTTTACAGAAGAAATTCTCTGATCATTTAGTTCTGTCTATTTAGAAATATGTAAAACTG	-64.4	207
CCTTGGCGGATTGTAAGCTGCTGGTTTTGCGGCTGGGAAGAGCGGCGAGAGGGTTCGGCATTTTTCGTCG	-42.4	1519
GGCCCGAGGATCCCATGGCTCTCACACCATGTTTTTGTACAGAACTGATGGTTGAATCTTTGTTCTCTTG	-25.7	27
ATGACACGTTCAGAGTGGAGTTCCTGGTCGTTCCCACAGCCATTCTGGCGTTCCTGGTCAATCATGACTT	-25.4	1176
GTCTGTCTACCTGTTTCTTCTACAAGATCCCTATTTGACTGTAAAAGTAGCTAATACTCACATGTTCTCC	-95	238
TGAGATGTGTTTTATCTGTTTTATATTTTAAAAGATTCTGCCAGAAAATAAAACCAGACCTTGTTCTAAA	-90.2	981
GGATTCTAAGGTTTCCTAGGTCACTGAACAACTAATCTTGGTCCCTGAATATTTCTAGGTTTGTAAGTGC	-21.7	580
AGGGGCTCTTCATCTGCCTGCGCTCTCGTCGGTTTTTTTAGGATTATTGAAAGAGTCTGGGACCCTTGTT	-26.1	123
GCAGGGACCGATACTTGTCATCAGGGATCGCCACCTCACACAGTGCCAAGCCCCCGACGCACAAATATGT	-26.8	1237
GGGGGGTAGTTTACTTTGTTGTAAGGACTTGATAACCTGGCTACAGCGTTTTCTATGAAATCTACTTGGA	-21	223
AATTCCAGTGACATGGGTACCTCCTCCTGGAATGCATTGTGACCGGAATCACTGGATTAATCCTCACATG	-33.6	739
TTTTTAAGAAATCCTAATAAGTAACATACCCAAAATGCTCTGTCTTGAGTCATGAGAACCATCAGTTCTT	-70	156
TGAGGCTTGGATAGGCGTGAGGAGGCGCATACGACCGCACAACCCGAGGTTTGTAACTGTATTCGGAAGA	-20.2	2085
AGAAATCCTAATAAGTAACATACCCAAAATGCTCTGTCTTGAGTCATGAGAACCATCAGTTCTTGATATT	-70.2	139
GAGGAGATAAGACAGTAGGGAAAGACAAGGGCCCATGCTTTTAGTGGGGAAAACTCTTGGAGCCATTTTT	-68.8	554
CAATAATTGATTTTGAGGAATCAGTTTTTTTCTATGGCTAATAAACTTTTTAATTCACTTATACTGAAAA	-59.7	18
ATTTTCTGTAAGCTTGCTGTTTTACAGGGGATTTATCAATAATTGATTTTGAGGAATCAGTTTTTTTCTA	-76.2	415
TTTGTTGAACTGTGTGTTTAAGCTGTTGCATTAAAAAGCTTTCTTCTACATCAATATCTGCTGTGCTTTC	-23.4	364
GTGCCCACACTGTAAGAAGGTCATTCCGCACTTTACTGCTACTGCTGATGCCTTCAAAGATGACCGAAAG	-27.4	785
CCTCTGAGTGCCAAGGACACCACTGGAACTCACAAAGGTCTCCTTCACCGAAAACCCATATACCTTTTAA	-23.7	1097
AGTATAGCTACTCCTTATTCCACCTCATGCTCTGCTTGGCTTCCTTGTACATCATGATGACCCTGACCAG	-27.9	1185
AATGATAGGATATTCCCTGCTGCCTACCTGGAGATTCAGTAGGATCTTTTGAGTGGAGGTGGGTAGAGAG	-25.2	298
ACTGAACAACTCCTATTCCCATTTTTGCTAAACTCAATTTCTGGTTTTGGTATATATCCATTCCAGCTTA	-21.3	576
TCAGGATAAACCATACTTCCACCTTGGGTGAGAACACTTGCAACAGTTTATTAATGAGGTGACTTTCACC	-24.5	389
AGATGACCTTATTTCTTAACTGTTTCAAATAAATGATTAAAGTATTTTCATACATTTTGCTTCTTGCCCA	-22.1	184
GGGAACAGTGGTACTAACCCACGATTCTGAGCCCTGAGTATGCCTGGACATTGATGCTAACATGACATGC	-35	1
CCGCTCCGCATGGCGGCAGCGGCCTGCACACCAAGGGCGCCCTTCCCCTGGATACGGTCACTTTCTACAA	-107.5	987
CCTACTATTATGATAGTTTTTAAGGTTTCAATTCAATCTTCTGAACGGCATAAGTCCTATTTTAGCCTTA	-20.7	179
TCATCTCTCTATATTTATACATAACCCCGGGGAAGACACAGAGACTCGTACCTGCGCTGTTTGTGCCGCC	-25.7	246
GGAAAAATGAGATATTCTCTAATTTATTCTTCTATAACACTCTATATAGAGCTATGTGAGTACTAATCAC	-20.3	482
TGTTTTTAATAACTAAAGTTTTTTCCCCTCATTATTAAAATGAATTTACCAGTAAAAAAAAAAAAAAAAA	-34.8	1
TATGCAGACATTGTGGATGTCCTGAACAGCCCTTTGGAAGGACCTGACCAGAAGAGCTTCATTCCTGTGG	-105.9	731
GGCAGCGGGATAATTTAGAGTCACTGATATTACGAGAGGGGTCTTTTTGTAAACCTCCTTTTCAATGTCA	-21.6	600
AAAGTGGAACACTCGGGAGAGCTATGATGATGTATCTAGCTTCCGGGCCAAGACAGCTCATGGCAGAGGC	-25	339
GCATCTTGTGATATCAGAGGTAACTATGCAAAGCATCCAGGCGGTTCTGAATGTGAAGCACTACACCCAG	-25.7	714
TACTTTCTAAAGTTTATTGATACTTCCCTTTTATGTAAAATGTAGTAGTGATACCTATATTTCCACATTG	-69.2	163
AAGTGCATGTCATTTCTTAATACACTAGAAAGGGGAAATAAATTAAAGTACACAAGTCCAAGTCTAAAAC	-63.1	475
CATATACTAAGTTACAGAGGATGCATCCAAGTAGAGAAAATAATATGTGGGTTAAGATACATCCTTAAAC	-25.5	961
TAAGGTGGTACACAGCGTGTCTTGTTAGCAAAATTTATACTTTGATATGATCACATGTAGAAGTAGCTTC	-20.5	152
TCTGGGATTGGGAAAAAATTCGGCCTCCTGAAATGACAGCAGGGAGACTTGGGTCGGCCTCCTGAAATGA	-27.1	293
GCTCCAGAATGTTGCAAGTCTAGGAGAGTGTTCCAATGGCTGACAGAAACTGCCTATTTGAAATGGCTCA	-25.4	721
GGCGGCTGATCCTGGACTGGGTACCTTACATCAATGGCAAGTTTAAGAAGGATAATTAATTACACAAACC	-28.8	1102
TTGGGGCCACCTGACCAGTAAACTGTGGACTAGTAGAAAGTTCATATTCTACCTCTAAAAACAGGTAGTG	-21.3	334
AATGCCTTTAAGAGATATAATTAACGTGCAGTTTTAATATCTACTAAATTAAGAATGACTTCATTATGAT	-20.1	221
CATCGGCAGGAGAATGCGCGGGCTCTTTTTCTGATGAGGGTACTTGAAGGGCTGATGGACAGGGGTCAGG	-24.7	581
CACCAAAGCTTTCCTAATGAAGAAAACGATGTGGACAAAATTAAGCTAGATCAAGAGACCTTGAGAGCAG	-23.1	525
CATTAATGAATTAAAAGCATTCCTTATTTTTTAACTAATATTTGTACATTTTCTTAGTCTCTTTCCAAGT	-22.5	211
GCAGCACCTACTTCTAATCTGAGGACCCGCGATTTACACTTTTGCTGAATAGGACACTGTGGAATGAAAC	-22.6	512
TGCAGTCTTCCCTGCCTCTGAATTCCGTTTATGTCTACCGTCCCCTCAAGCACACCCTGGTGACCTGTGA	-25.4	747
GCTTTTCCTTGATAGAGATTCCATCNGGTTGATAGTTACCATCTTAGAAGTTAAACTAAGAATGGTTTAA	-19.6	9
TTGAGAGCTGGCGCTACCAACCTTTTTCCTATATCCCGAGTGGGGCACAGACGGTGGATCTCTGCCCAGT	-22.8	224
TGGATCGCAAATTGCTTGAGCTGTTGTGGAATAAATACTGGGTGAATACGTTGAGTTCTTCTAGCTTGCT	-27.1	634
AAGCTCAAATTAGTTAGGAATGACTTATACGTTTTGTTTTGAATACCTAAGAGATACTTTTTGGATATTT	-28.2	710
GTCATATTTCATGTCAAAGGAAATCAGCAGTGATAGATGAAGGGTTCGCAGCGAGAGTCCCGGACTTGTC	-32.2	564
GGACATCCTGGGAACTCTGGGACTCACTAGATTCTGCAGTCAAAGATGACTAATATCCTTGCATTTTTGA	-28.2	167
TTGTTTTCCCCCCTTTTATTCCCTAGGCCCTTTTCAGACTCCTGGGCCCTTGGATACTCTTCTCCCATCT	-26	440
CCTCTCCCGCAGTTCCCAAGGACTTGTCATTTCATGTTCTTATTTTAGACCTGTTTTGTAAATAAAGCTG	-23.1	293
TGTGCCCATCCTTAGCCAACTTGCTGGCGTGACAAGTGCCCACAAGTAACACACCAGGTACCCAGAGCAG	-24.7	211
GTTGTGGTCAACATCCTCATTGGGAGGACGGACTTCCGCGATGGCTCCATTGCTGTATAGGGCCTTGTGG	-22.9	266
AATCGGGCGACGTTTACTACAACACCGGGGACGTACTGGCCATGGACCGCGAAGGCTTCCTCTACTTCCG	-27.5	770
GCTGCCCCTCCATCCAAAACTGCCAAGTGACTCATTGCCTTCCCAACCCTTCCAGAGGCTTTCTGTGAAA	-25	693
GTACTGGGCTGTCAGGGATCTTTTCTATACCAGAACTGCGGTCACTATTTTGTAATAAATGTGGCTGGAG	-24.2	1251
TGAGGAAATTTTGTAGGAAATTTGCATACCCGTAAAGGGAGACTTTTTTAAATAACAGTTGAGTCTTTGC	-21.5	236
TTAACGAAGCCATGACTCAGATCAGGGAGCTGGAGGAGAAGGCTATGGAAGAGCTCAAGGAGATCATACA	-28.8	776
GACACTTCCAGTGCTGACCGGCAGACCCGCATGGAGGGCGCAGAAATCAACAAGAGTCTCTTAGCCCTGA	-28	1202
TTCTTCGGAGCTTGTCTTATTTGCTATAGAAAACAATACAGAGCTTTTGGGAATGGACTCACTGATTTTC	-23.2	316
CAGGAAAGGGGACGTTCAGCTGAGCCGAGTGTGTATACTGCTCTGGCCATCCACTAGCCCAGGGAGGACC	-32	730
TTCAGCTGAGCCGAGTGTGTATACTGCTCTGGCCATCCACTAGCCCAGGGAGGACCCAGACCTCCACACT	-41.4	730
CGACCTAGGCGATGGAAGCTCCAGCACTGGCAGCGTGGGCAGTCCGGATCAGTTGCCCCTGGCCTGTTCC	-27.7	255
CCTGGATGTACTATCCAATCTGTGATGACATTCCCTGCTAATAAAAGACAACATAACTCAAGTCTGGCAG	-21.1	283
GTGTCCTGGGGAGAAGGAAGGCTGAGCCTCTCCCCAGCCTTCATGCCTTCCCCACCCTCCAGCTCCTCTT	-30.8	382
TCTCTTTCTCATTGTTAATTCAGTAATTCTAATACTGTCTGTTATAATTACCATTTTGGTACAGCACAAG	-20.9	766
GCTTGCTAAATGGTGTACATTTCTTGTTAACCACGTTATTAAAACTTGATCAGCACATAAAAAAAAAAAA	-74.7	2
ATACAGACTGGGCTAGTCCAGTGTCTATATTTAAACTTGTTCTTTTCTTTTAATAAAGTTTAGGTAACAT	-83.1	710
TCATTGAGCACCAGAAGTGTGAGAACGCCTACCCCGGCAACATCACAGACACCATGGTGTGTGCCAGCGT	-27.8	529
CCTTTGTGTATGTAGTTCTTGCATCCTATACTGGATAAGCCTGTTTTAACCTGCTATGATGGGTGCTTCC	-22.5	310
AGTCTTTGTGTCTGCAATGAAATTGTACTCCTTGACAGTTGATAGATTATATATTCTTCCATCCCTCAAA	-23.7	951
ATCGCCCTTAAAGACCCATTGTAAGGTCATAAAAAACCTCGGCCACCTGCACAAAGATGGTGCCTCACTG	-23.7	728
CTTCAGACTCAGCCCTCCTGGAGGCTGTCATGTAGGGGACTCTCGAGTTCCTTTGTTCTACCCCATCTCT	-28.6	21
TTTTCACACATAGATTTAAGTATCTTGATTGTTAGTAGTCTAAAAATGGGAAGAATGAAAAAGCATAACT	-44.4	452
GATCTCAGTTCTCCTTTCTTGTAAAGTAAGAAAATCTTATTTATGATATATGCAGTTAACTTACCTTGCC	-58.2	619
GGGCCTTCGAGGCACGTGACCGCAACCTGCAAGAGGGCAACTTGGAGCGGGTCAACTTCTGGTCAGCTGT	-26.5	436
CACTTCGTGAGGCAGATGTAGACTGCTTGACTTTAGGACAATATATGCAGCCAACAAGGCGTCACCTTAA	-23.4	719
CACAATGTCATGTAATGTAAAGGAAACCCTTTTGGAATTAGAATTCTTGTTCTGATGCTGAACTATTTGG	-22.3	59
GAGCATTTTCGTTCGTCATTGGAAGATAACGAGGATGATATTGTAGAAATGAGTGAATTTTCATATCCTG	-29.9	1517
GCAGATCGTGCTGCACAACCGGAGAAGACAGAATTACCTCTGCTCTTTTAATATATAATGATGGCTTTAA	-22.9	228
GTCAAACAAACACCACTTTTCAATGGTTTGCTAGGAGTATTTCTGTATTGAAAGTTTCTAATTATGCTTT	-21.7	72
GGTAGGTTCGTGCAGAGATGGGGCTGGCAGGGGGGCTATGGGAGGATTATTTTAACAGATCAAGAAAATG	-29.4	1305
AGCTGCTTCCATGTCTGGTGATGATAACCTTGAAGATGACTACTTACTCTGAAGTCTGGGCTTCAGTTTG	-24.2	652
CCTGGCATGCAATGGACATGGAAGCTGAAAATTACTTGGGTATTCTCTGATTTCTAGCTAATATGAAAAT	-21.8	129
GCCAATCATTTTTAGAGGGAGGAATCAGTGTTGGATTGCAGAGACATTTTCTGGAGTGATCCATGAAGGA	-27.9	1207
AGACGCTGGGAACTTGTGGGACTCACCTGACTCAAAGATGACTAATATCGTCCCATTTTGGAAATAAAGC	-26.2	30
TGACGTATGCCCCGGTGAAACACTCCAGTCCTAGGAGAGAAATGGCCTCTCCTCCCTCCTCACTGTCTGG	-83.1	430
CATTCCAACTTGAAGAATTATTCAACACCTTTAACAATGTATATGTGAAGTACTTTATTCTTTCATATTT	-20.9	86
CTAGGACCTACATTATCTGGACTGTATGCTGGTCATTTCTAGAGACAGCAATCAATATTTGAGTGTAAGG	-22.2	156
CCAGAGACCATCCTTTTCTGCATCTCTAGCTTTCACAGCTGCAAAGAGACTTCTTCTAGCAAGTTTGCAA	-24.1	182
GGAAGATGAACAACGGCGGCAAAGCCGAGAAGGAGAACACCCCGAGCGAGGCCAACCTTCAGGAGGAGGA	-27.1	964
AAGAGCTCTGAACTGTATTCAGACCGACTGGGTATCTAGCTTACTGTTTTAACATCATTGTTGAAACCAG	-21.5	266
AGTGAGCACACTGGCTTTGCATCCTGGAAGACCTGCAGGGGGCGGGGCAGGAAATGTACCTGAAAAGGAT	-33.9	3053
TTGGGATTGGGTGGCCTAGTTTGAAAGAGTGATTTAAGTAATCACTATGTAAGTGGTGAGAGATGCAGGA	-22.9	272
AGCTGTGTTCCAGGGGAGCCCTGGACAAGCCCTCATAGGCAGGGAGGGGGTTTCCGAGGCCAGGCATCCG	-28.9	179
TGTCTTCATAATATAACAACACTAATACACTAATAGTAAGATTAAGTTAGGCAGTCTTCTACCAAATGTG	-20.7	485
CTTGAGGCCCCTGACTTCCTTCTAGGGCAGTCTGGCCTGCCCACAAACTGACTTTGTGACCTGTCCCCCA	-26.6	312
CATTCCCAAGAAGGACATCGTTTAACACCTAAACTCATTTAACAAAGGATCCGAGAAGAACAGGGACAGT	-21.6	192
GTTTTGTATTCTGTCAATGCAAATATAAGACAGGTTGAGCCTTAATCATGTAACAAAATATTTTGTAGAT	-20.1	501
TCTTTTGTTTTTGTTCTTTAAAGAACGTTTTACTTATCTTAGTATTTCATTTTTCATCTATATTATGAGG	-86.5	413
GATGGTGATTGCTCACACCAAAGCCTTGGACCCCTCCCAGCCTGTGACCTTTGTGACCAACTCCACCTAC	-109.8	318
TACATCGTACCCATCCATTCGGCTTCACCTGCAGCCAACGGCCTGGAATCGCAAAGAGACACCACTCTGG	-25.3	285
GGAGAACCGTGTGGTCTTATCTGTGTCCAGCGGGGGCCAGCATACAGTCTTATTAGTCAAGGACAAAGAA	-28.1	992
AGAAGAACCTTACTTCCATAATTTGGGAAGGAATGGAAGATGGACACCACCGGACACCACCAGACACTAG	-23.7	394
AAGTATGAATGGGATGGAGCTAAGAAGTCTGAATACTTAATGAAATGGACTTTTTGGAAAGAAATCAGAT	-21.7	472
AGACATCACAATCCCATTATTCAGAGCGCGTATGGAGTGGAAACGCTTGTAGGGTTTCACCAGTCTTTCC	-94.9	514
GCAATTGGCATTGCCTACAAATCAGCTCCAAAGAATGAATGGATTGGCAAGAATGCCTCCTCATGGGTCT	-25.6	477
TAATCTCTACGCATTAGCAATATTGACTGTAAACCCACATTAAGGAAACCACTACGGGTCTGGCAGTGCG	-20.8	352
TCCCAACGTCCCTAGCCCTTACGTCCTTCCACTTCCAAGATCTTTTTCCAGGTTCCTGAGCCCTACTGTG	-24.5	282
CGAGTGGCTCAGAGAGGCTGCCCAGGGAGGACGCAGCCTGTGCAGTAAAGAATTTAATCTTGCCCAAAAA	-32.2	356
TGCTTCCCTACTTGCCATCTGGGGAGTCGCTGCCGCAGACCGCGGATGAGATCCAGAATACCCTGACCTC	-27.2	325
ATGTTAAAGCTTGCTCACCTTCAGAGCAGAGGAATACCTATCTACAGATATCCGCCCATTTTCATCTCTC	-74.7	36
GACCACCTTGCCGCTTTTCATCACAAGCTTGAATATTTAAATTCTGTACTTATATCTGTAAAATAGCCAG	-20.5	84
GGGGCCACTTAATTCCATTAGTCCTCTTTTTATACTGAATATTTTATTAGATACATGTTATTCCCTTTTT	-21.1	497
GGAGAAGTAAAAGAAGCCGCTTGTCTCTGTGAGCACAGCTATATACAGTGTAGAATAAATGTGGTAGAAA	-25.1	319
GATTCATGCTATAGTTACTTAATCAAAGATTTTTTTCAAACCTGCCTTACATATAGGCCCACTTTAAAAG	-20.6	673
GGCGGCGGGCAGGGCTGCTTTTCTTAGTCTGATACCAAGCAAGGCCTTTTCTGAATAAATTCATTTGACT	-30.6	875
GAAGGTACTCTCCAAATGGTTTGGATTAATCGCTGCTTTCCAGGATATGGAATGAATGTCCAGCAACATC	-22.4	357
GGAATACAGGCTTGATAACACAGTCCTTACCCTTACAATGTAATGTTAGAGATAAAGGAGCAAATAGAGT	-21.6	277
AAAAACAAATGTTTATGCTAAAAATAACACCAAAATGTGGTGAACTCTTAAGGACTTTTCCCTTCAAGTG	-22.2	2127
GTGTGTCTTCTCAAGTGAAAACGCAACTCTAGGTTTCAAGTACTCCTTTTCTCCGATCCTGTGGTACTTG	-21.4	111
CTGTCCAGTTTCAGCATCTGGTTGCTTTTAAGCCAAGTACATCTAGTTTCCCTATTAAAAATGTGTCTGA	-23.7	1220
CTTAGGAACATACAAAAGGTAATGTAAACTCTGCCACTTTTTTGTGTTCAAAATTTTGGTTTTTATGAAG	-42.5	151
TTCTTCTCTCCCTTATGTAACATCTCCTGAGGGTGTTTAGTTGCATGGCTGTTCAGAAAGGTATTAAGGG	-58.9	587
AGTAATGGGCCTCAAAAGTTTTGCATTGAAAAAGTTGGCAAAGACACTTGGTTACCAAGAAGCCATACAT	-91	1174
CACCTCGTTGGGAGACTGCCCCTCGCTCCCACCCTTCTCTATTGTCTGGACCCAGTGGGCATCTTGCCCT	-115.1	1130
CTCTGATATCTCAGTCCCATACCTCACACAACCTTCACCCTCAGAAGCCTCATTTGCCTGCCTCCCATGG	-27.4	2219
GAGGGGAGAATCTGGAACTTCGAGATTATCAGCTAGAAGGTCTAAACTGGCTAGCTCATTCCTGGTGCAA	-22.6	5710
TGCCATTTTGAAGACTGAGACGTTGGAGTTTTATCCTAGAGGATAAAGGAAATCTTTGGGAAAGTCAGTA	-23.2	488
CATGTGTGTTCGTGCGTGTGTGTGCGTACGTGTATATAACTGAAGTGTCTGTACGGAATGCCCTTTGCTA	-18.8	114
CCTGGGTATCCACGGGACAAAAACAGCAAACTCCCTCAGACTTTGTCCATGTATAAACTTGAAGTGGTTG	-24.2	1104
CAGGCTTCAGCTGCCTTCAACTGGAACGACCAGCGCTGCAAAACCCGAAACCGTTACATCTGCCAGTTTG	-113.3	881
AGACTGAATAATGAAACCAGACCCAGTGTTCAAGAGGACTCACAAGCCTTCAATCCTGATAATCCTTATC	-23.2	638
GATTGAAAGCTTAATAATCTCCTACCTAAAAAGATAAAATTAATTGCAATCTACCATATCTTAAGTATAG	-20.3	406
GGAGGAAGAAGAAAAAGTGCTCAGGGATTTATAATTTTAAAACAAATATGCACAGAAAATAAACATTTCT	-23.4	733
GAGATTCTGAAACTCCACTGTAGTTTACTTTGCCTGTACCATTAATGCCAATGTTTTTATAAATCACTTG	-22.6	337
CTGACCTTGGTGATGTGGGGAGCCTCCATGACGGCTCCCCCTGAGATTCAGGTGGGAGAAGATGCACCGT	-26.1	723
AATTTTTCCTTAGATGGTCTGTCCTTTTTGTGATTTCTGTATAGGACTCTTTATCTTGAGCTGTGGTATT	-54.7	350
ACTGGGAGAGAGAGAGGGACTTCAGAGATGACAGGATCAAGGGGAGGGAGAAGAAGGAAAGAGGCAAGTA	-19.8	114
GTGTTACTGAAGTTAACGCAGAAGTCTGGCCTCCGTTTGTGGGATTATTAAATATATATCCTACGGGATC	-21.4	191
TTGTGGCTATTTTTAATTGCTTTGGATTTGTTAAATGTTTTCTGTCTTCTGTTAAGTGTGTTTTCTCTGG	-26.8	178
TTGGTCATTATGAACCAGGTGAGCAATGCCTACCTATACCGCAAGAGGATCCAACCATGAGCTCTTCCCA	-23.9	314
GGCGCTGCCGCCCACCTTGTGGCCCTGGGCTTTACCATCTTTGTGGCTGTGCTTGCCAGGCCTGGCTCCA	-31	1124
TAGACTACATTTAATGTGTAGGAATTGTATGTATGTATATCTTCTGTAAATAACATCTAGTATCTTCACT	-21.6	224
TAGGAACTTTTGTGGGGAAGAGAGCTTTGAAGAGAGGAGGGGGACTTTAGAGAGGGATGAAAATGAGCCC	-26.4	141
AAGTGAAAGACCCGCACTATGCTGAGATGGAGGAGAAGTACTATCGTTTTGGCATCAAGCCAGAGTGGAT	-25.3	4729
TACAAAAAGAGTAATGGTTGGGTGATACTCCCTCAAGCCAAAGAGGAGCTCCCCAACCTGTTCTAGGGAC	-24.3	543
TCCTCTCAGCTACTCCAGGGCACCTGACTGCTCTGAGGAGAGGGAAGAAGGCCTGCTGGGGCTTTCCATG	-29.5	695
GTGACTCTGTAAGTAAGTTAAATACACCCTTATTATTTAGCTGTTAAGTAACTATAATGAAATCTGCTGC	-19.6	582
GGCCACACATCTTTTTTCTGACTTGAATAAACTGAAACCAGATGACTCAGGAGTTAATATAGCAGAAGCT	-24.5	930
CAGCAAGGGAAATTAATTAATGAGATTTGATAAATCAGTAGATAGAATGAGGTCCCCATTCTGAAATATT	-23.4	458
GGCAGGGCATTTGTGCCAACTAAGAATCACCAGATACCCACCATAAGTACCTATCGCAGTTTTGAAGTCG	-24.8	423
CCATCTCTGTCACCTAGCCAGGAGGGGTAGCAAAAATAAAGTCACGAGGACATAGTGGTCACCACTGTCA	-28.3	965
TTTGCTCGCAGACCTCCCATTGCCACAGCCCAAGCACCTTCTTCAACTCTCCCAAAATGGCTCAGCCTAA	-27.2	723
CCTTTTGGTGAACCTGCTATTTCGGATGACATTGGGCATTTTAGTTCTATATTTTTTGTGCCTCTTTTAT	-21.9	49
ATCGAGCAGCTGAAGGAGCACCTGCGTCTTGCCATGGCCGCCCTCCAGGAGAAGGAGTCGATGCGCAACA	-28.6	743
GTGCCCAGCGGGACAATCCCAGAGCCTCCAGAACCTCCTCTCCCAATAGAGCCACACGAGATAACCCCAG	-49.5	499
GCCTGATTCCTGCGTGTCCGAAAGAACTTAACGTTTTAAAGGTGATTGTCAAGTAACTGTGTGGGGTTCT	-21.8	131
CCCGTGCCCCGCCGTCCTCCTTCCCGCGGCCGTGAGGGAGACCGCGGCTCGGCCGTAGCGGAGCTGCGAG	-31.7	1349
CCCCACTGTAACGCCTGTTACACACAAACTGTTGTGGGTTCCTGCCAGGCTTGAAGAAAATGATCTGAAT	-27.2	265
ACCATTTTGATTTTTAAAGTATGCTGTAGCATTTCTTAATAACATCGTTGTGATGTTCTTAAGGCAGATC	-20.5	669
GTGGAATCTTAGTGTTTTAACATTTGAAATCCACTTAAACTGCAAATTGTTCTTTATATTTGATTGTGTT	-21.5	298
TTTTATTTGAAGTGAAGAACTTATTTAAGAATTATTTCAGTATTTACCTGTATTTTATTCTTGAAGTTGG	-20.5	117
CCCTCGTCTCTTGAATGTTTAGACTCTTAAGATCATATCCTGCCCCAAATTTCAAATTAATGAAATGAAG	-23.5	99
CAAACAGATCTTTGAAACCTCAGATTCTGTGGTGCAATTTTAATGTTTTCTTGTTTCTCAGTTTTCTGCT	-24.3	5718
AAACGTCCCGCAAACAGTGGAGAGTTAGACAAGATGGACGAAAAGCGGACCCGACTTCAACCGGAAGAAG	-26.2	547
GGAAGAATCTAAAGCAAAAACTGGACAGGAAGAATCTAAAGCAAACATTGAAAGTAAACGACCCAAAGCA	-23	457
CTGCAAAAGAAGAGGAAAAAATTCAGCGTCGACCTCATGAGTTACCTCCCCAGAGTCAACCTTGGGTGAT	-23.8	370
CATGTGACACCTTACCGGAGTAAAAGTGGTAAACAAAAGCAATCAGTACCAATTCCAAAAACTGTATCCA	-21.4	234
ACCATCCTGATTATCCATTTTCAGATGAATATTAGCATAGAGGGTGTTGCACGACATCTAGCAGAAGGCC	-22.3	183
CCCGCCAGTAGCTGTTCCTAGTGTATTTTCGTCTTTCTGGAAAACAGCATTGAGTGGTTGTTTTCTGTGT	-23.7	168
GGCTTCTGAGCTTGCCCAAAGTAATGTCTGACTGTTGGTTTTTCCCTTCACAGGGGACGACTTAGCTTCT	-25	482
CTCTGGAAAAGCAGCCCCCATTTCCTCGGGTACCAATAAATAAAACATGCAGGCTGAAAAAAAAAAAAAA	-85.2	3
AGGATCCTGTATTGTGCCCGGGCCCATGGGGAGGACGATGGTGAGGAGATCCTGTTGGACACCCAGTGCC	-114.7	1503
CTTCGGCCTGGAGCACGACGGCGCGCCCGGCAGCGGCTGCGGCCCCAGCGGACACGTGATGGCTTCGGAC	-133.4	281
CGCCCTTTCCTTCTTGTTTGTTCCTCTGTGTTCTGTGTGCGTCTTAAGCAATAAAGCGTGGCCGTGGCTC	-26.5	21
TGTGTGTGGCGCCCTTTCCTCCTTGTTTGTTCCTCTGTGTTCTGTGTGCGTCTTAAGCAATAAAGCGTGG	-109.4	655
AAGGCTCTGAAACCCGAGGATGCCAAGCCCTGCGAAAGCCAGCTGTGCCCCCTGTGATTCAGGGGGGCAG	-30	327
CTCAATCTAAGTCAGTCCACTTTGACTTCGTACTGTCTTTCACCTTTCCATTGTTGCATCTTGAATTTTT	-21.5	38
GTTATTCACACCCAGAGATAAACTAACAGTAGAAGAACTGGAACAATTTCAATCCAAGAAATTTACTCTG	-21.3	511
TTTTAGTGATAATAAAAGAAAGCATGGTATTAAACTATCATAGAAGTAGACAGAAAAAGAAAAAAGGACT	-21.8	323
ACTGATTTGGGGCAATGAGGAATATTTGACAATTAAGTTAATCTTCACGTTTTTGCAAACTTTGATTTTT	-23.4	2112
CCAACCTATCGGGAGTCTGTCTGTTTACTCTGACCTCAAACAAGGGCGCCTGATAATCCATCACTTACAT	-23	188
TGAAGGAAACGTGCGAAGCACAGGCTGAAGAGGGGTTTCTAACCTGGGAAAGGTGCTCAAGGAGGACTTG	-26.4	394
ACAGCACCGGTGTACCCGACCGCATCCAGGTCACCACAGACATGTACCAGGTGCTGGCTGCCAACACGTA	-26.4	144
AGATGATGACCTACTTCCTCAATGGAGGGCCCCCGCTCAGTTAGCAGCTGTTGGCCAATGGTGCCAGGCA	-27.9	2284
GTTCACTCTCCCAACCCTGCTCCAGCCCCTCAGCTTCCCAGACCCTCATGCAGTTGGTTGTAAATTCTCC	-31.2	707
GCTAGGAAACCTTAAGTATGGGGAAGGTAGAAAGTTCATTTCATCACTTAGAAAATATGTCTTCTCAAGA	-22.6	468
TGCATTATCTGGTAATAGTAGGGAACTAGTATTGGATTGAATGAATAGTCTTCCATTTTGGAAACGTTCA	-23.6	730
ATTTATTGAACTACCAGCAGTATCTAGGAGACCACGAAGGAATACCACGAAGGAATTTATGCTCCAGTGC	-22.3	298
GTCTGCTGCAGACATTGAAAGATACGAGAAATGGATATTTGAGTTTGGATCATGCTAAATTCTCACATGT	-23	225
TAGGGTTTTACAGAGTCGCAGCAGGAAAGAGAGCTCCCTGGTCTCCTGGGAAGTGTGACCTCTTCTAATG	-30.5	768
CTGTCTCCTCTCCTGATTTCCTCCAATCTCTGTAGCCCCAGAAGTGAACGCCAGACAGGAACACGCATGT	-51	701
ACATGGACAATATCCATGGTGTAGCTGACAGCTAATAGGGGCTGTAAAGGAATTAAACTATTCAGAAGGG	-23.1	418
TGGAATGAATGTATTTCATTCAAATCTGTATTCCTCTAGGAAGGATTAAAATTAAACTTTTTTAAAATAC	-21.2	42
GTAGGATTAACAGTGCTGTGTATTCAGCGGATGAGTCTCTTTCTGCACATAAATAAAAGGAAAAGAAACA	-24	1329
ACACTTCCTGAAGATTAAAGGGAAGCTGATTGATATTGTGAGCAGCCAGAAGATTTGGCTTCCTGCCACA	-25.1	751
TACTTCAATCAGGATATTATCTGCTTTACTTTACAAATAAAACCAAATCTTTTGTCAACAGGATGAAACC	-22.1	704
GCTGTCAAAAGCTTATTAGCATCAATCAAGATTCTAGGTCTCCAAAAGTACAGGCTTTTTCTTCATTACC	-21.2	109
CATCAAAGGAAACCAACCGGGATGCTAACTACAACATGGTTAGAATCCTAATTAGCTACTTTAAGATCCT	-22.4	2065
GCCATCGCTCAGAGAAAAGTGAGATAAGTATTGGTGAAGAGATAGAAGAAGACCTTTCTGTGGAAATAGA	-22.8	782
TGCGGAGGAGCCGATCCTCGCACCCTCCGCTCCCTCCACTGGCCCTCCAGGTCGATTCCCTGGGCTCCAG	-29.7	76
CCAGTACTTGACTCGTGGAGAGGAGTCTTCGTCCGATACCAATAAGTCAGCCTGATGCTCTAATGGAAAA	-23.3	459
AAAGGGGAACTCATTTAGCTCACGAGTGGTCGAGTGAAGATTGAAAATTAACCTCTGAGGGCCAGCACAG	-58.7	512
ACCGGGTGACCGGCTTACAGGGATATTTTTAATCCCGTTATGGACTCTGTCTCCAGGAGAGGGGTCTATC	-24.8	185
GCAGGAGGAAAAAAAGACTCAGTTCAGAAAGAAAAAGAGAGAGCAAGAGTTGAGAGAAATGGCATGGAGC	-26.1	2222
GGAGAAGAAATGGGGTAAATTTTTAGTGATGTTGCTAATCATTGAATTCTGTTCTCTATTAAATTAAGAA	-21.1	292
AATTTGAGGTCCTGGCTGAGCCAAGGAGTAATGGACCAGATCTACCTCAGTATTCAAGTTCAGTGGGGAC	-26.4	308
GAATATCAGATATATTTTTTGACTGTACATTACAGTGAAGTGTAATCTTTTTACACCTGCAAGTCCATCT	-22.2	121
GCACTTTTCCTAAAACAGAATTGTTTCCCACTTAGGTGTCAGAATGTACCTTTGAACTTCCCTAAGAAGC	-23	692
CCACACGCTCGTCTCACTCAATTCAATGTCACACTTCTGCCTCTTGCAAAATTGCTGGAAAAAGTAATAA	-26.8	575
CCCTCTTCATCAACATAGTAAAATAAGTCAAACAAAATGAGAACACCAAATTTTGGGGGAATAAATTTTT	-23.8	266
CAGTTTAGATGTATGTGTAAATCGATTAGCTATTTATCCAACTACTGTATATTTAGGTAACTAGAATTTC	-20	682
CCCTTCCTACTGATGTGATTGTGGATTAGGAATTCGTGACCGAGTGATTTTTGGCCAGTGGTTGGGTTTA	-24.6	328
GTGTGCTGATGCTGGCCTCCTTTGAGAAGACGGCTGACCATCTCTTTGACGCTGCCTACTTCGGGCAGAA	-25.7	2298
AGCGGGAACGCCGAGAGAAGGAGAGAGAAGAGTGGGAACGCCAGTACAGCCGGCAGAGCCGCTCACCCTC	-29.2	190
GCAATAACTTCTGACCTTTTGGTGAAAGCTGAGAACTCCTGACTGTAACATATTCTGTATGAACTTTATC	-23.8	37
ATTATATTCTTTTCAAAGATTCAGAGATTGGCTTTTGTCATCCACTATTGTATGTTTTGTTTCATTGACC	-22.5	328
CCAGGAGGGTGGGGTGCTTCTTGTAGCCCTCAGCTCTCCGGTCTCTGCTGATGAAATGGGCTCCAGGTGG	-28.9	403
GACTCCATATGGAGGCCTCACACCCAGAGGGTAGGGCAGCAGATCTTCTTTATAACTATTTATTGTTCGA	-28.6	911
CGGGCTGTCCCCACTCCACACCGTGGCAGTGAAGAGCTGCTGAAGTACATGCTTCATAGTCCTTGCGTCT	-30.1	279
TGGGGGGTGTCCTGAAGGACAGGATGCTCTCCCCAGACCTCCCCAGGGTGGTGAAGCTGTGCCCTGGGGC	-28.7	305
CCCCCAGCTCATCCCAGAGCGTCCCTGCTGCAACCCTGACAGCCGTCTCCCAGGCCGCTTCCCCAACATC	-27.6	480
CAAGCTCCGTCTCTTGTAGCCAAGTCAGCTGAATTTATTTTCTTAAGCAATATTTGTGGTTATTTCTTCC	-23.2	111
TTGTGCTTGCTCTTCAGATGGATGGTTTGTAAGGCTCTTGTTGCATTTCTTAAAAAAGAGTAATAAAAAG	-23.5	561
CTGCTGTGATGCTAGTGTTGATTTTGCTCTCAGATGAACACAATGTCTCATACTAACCAAGAAGCAAGAA	-22	260
CAAAACCTGATACATCACCCTAACAGAGCATTAAGTTGTAACTGAGATTGCAATACCTGTCACCATGCAG	-22.2	166
GCCGAGGGCTGGGTCCCAGGCAGCATCCTGGCGCCCCTCACCAAAGCCACAGCAGCAGAAAGTAGTGACG	-31.7	3934
TTCTATGATTCTGAGGAGCCGGTGAGCACCCACCAGGAGGCAGAAAATGAAAAGGACAGGGCTGACCAGA	-28	406
CAGATAGATGCCATCTCGCCCGCTCCTGACTTCCTCTACTTGCGCTGCTCGGCCCAGCCTGGGGGGCCCG	-35	311
AACTCCAGAAGTGCTTCGATGTGAAGGACGTGCAGATGCTGCAGGACGCCATCAGCAAGATGGACCCCAC	-71.4	575
AGAAGCTGGAGGAGATGCGCAAGAAGGAGAAGAGCATGCCCTGGAACGTGGACACGCTCAGCAAAGACGG	-86.8	1211
GTCTTGTACATATGTTTTTTGGAATTTCTTTGTAGCATCAGTGTCCTCCTGTTTTACCATGTCTTTTACC	-23.8	703
CAGCAGATATGGAGAGAGCTGACAATCAATTCACATTTTTTAAGCCATTTTAGCTAAACTGTCATTGTGC	-23.3	142
GGGCGCTAGGCTGCCCCGGGGAGGCGCTGCGGACCGGCGGCCCAGGCACGGAGAGGCGGCGAGACCGCAG	-37.2	1274
TCCAGTTTCAGTGTCACTGTTAAAATTTATCAAAAAGCAACTTCACTAGGGGTTTTCTTAAGGGATAAAG	-79.1	132
GCACCAGGCACCAACGGAGAGGCAGCTTCGATATAAGGAAAAAGTGGCTGAACTCAGGAAGAAAAGAAAT	-25.4	2658
CCAGTTTCAGTGTCACTGTTAAAATTTATCAAAAAGCAACTTCACTAGGGGTTTTCTTAAGGGATAAAGG	-79.7	85
TTCTGAATACTAATCTTAGAAATGTGTAAAAGATATTATTTTGATTGTTAAACAAATAAAATCCTGTTTT	-23.1	10
CAATAACTGAAAAAGACTGTCCTGTCAGCGATGACTTTATACATCAAGGGGGTCTTGTTTTGCTAGAGAG	-23	527
GTGGAAGAACTCATTGAAATAAAAACAAAGTCTACCTCTGAAGAAAATATTGGGATAAAGTGAAAGTTCC	-21.4	356
TTATAAACAACCACTTAAACCCTCCGGATCTGAGCCTCCCGCAGAGGAATGCAGAATGACGCCACGGCAC	-28.4	723
ACCAAGATGATTGATTTGACAAGGTATTTTAGTCTAGTTTTATATGAACGGTTGTATCAGGGTAACCAAC	-19.9	492
ATAGCTGAATTCAATGTTTATTCTTATGGACTACTTAGCATTTGACTAGACGGTATGAATTTCTAAGTAA	-23.7	497
TGAGGATTTTATGAAAGCTTTATACAGACATTTATAGGAAACTCATTCTTTGATTTTAGGTGCCATTTAA	-21.9	142
TACGTACCCCCAAAGAGCCGGGAGCTGAGGGTCAACCGGGGCCTGGACACCGGGCGCAGGAGGGCAGCAC	-31.6	526
TTTCGACGTGTACCTTGACATCTGTGATGATGATGACTTTTAAGGACCCTGGGGGCTGTGCTAGGGACCT	-71.4	169
TCTGCGCTTCCAGTGATAAGGGTACTGTCCATATCTTTGCTCTCAAGGATACCCGCCTCAACCGCCGCTC	-60.9	702
GTTCAAGGAGACGCTTCCTGTGAAGCCCTAACCCTAGAAATCCTCAGTGACAAAGGCTGTCCTGAGGTAG	-24.1	89
CCTGAACACCTATAGGAAGAAGGAAGACAGAGAAAAACCATGATTCGAGGCATGACCCAGCTCACCTGAC	-26.8	184
GTGAGGCACAAATATAGGCTAGAATCCAGGCCCCACAAATATAGGCTAGAATCCGGAATGTTTTCTTGAT	-24.8	389
GTCAGGAGCTGCAGACAAGTACCTTGGAGCATTCTGTTATTTTTGGAAAGTTCAAATATGCAGGGACAAG	-23.5	85
AGCACCAAGTGCCATGGCTGCGATTTCCCCGTGGAGGCTGGCGACAAGTTTATCGAAGCCCTGGGCCACA	-28.7	2335
TGCCATGTGAATCTGGAGGGGCAGCCGTTCTACTCCAAGAAGGACAGACCCCTGTGCAAGAAGCACGCAC	-26.6	191
CCCTCTTTTGCGACCCCTTGTCCTGACCTGTTCTCGGCACCTTAAATTATTAGACCCCGGGGCAGTCAGG	-23.9	38
GCGCCTGTGCGCGAGGGCGCGCGCGTCCCGAGCCCTCCACCCGTCGTGCCGGCGCCGCCCGGACCGCCAG	-37.6	953
TGAAGAATAAGTATGGGGATGCATTTATCCGAGGAAACAATGTGTTGTACATCAGTACACAGAAGAGACG	-30.2	279
AGCAGACAGAAGAATATGTAAATGGACAACTGAAGAATAAGTATGGGGATGCATTTATCCGAGGAAACAA	-49.1	471
TAATAGGGTTTTGTTTTTGTTGTTTCCTTTTTTACAGTAAAGGCTGAATTACATAAACATTGAGTAAATG	-74.7	1
TGTTTGCATTGTGTTTATTAATAGGGTTTTGTTTTTATTGTTTCCTTTTTTACAGTAAAGGCTGAATTAC	-83	2
TATAGTTAGGAATACACAAGCCGTAAAATCGAGTCCTTACAGCCATACCACAAGGTACGTCCATTTGGAC	-90.8	270
TGTTTGCATTGTGTTTATTAATAGGGTTTTGTTTTTATTGTTTCCTTTTTTACAGTAAAGGCTGAATGAC	-75.9	2
TCTGTTTTTAAACAATCGTTTTTGAGCAGATAGCTATTCATTCCAGATTTCCGTGTACCCACTCTGTTTC	-79.4	387
GCAAAGCCCAGCTTGAAACCTTCACTTAGGAACGTAATCGTGTCCCCTATCCTACTTCCCCTTCCTAATT	-24.2	166
GGTTATGTGTGCACCTCGAGATGAAGTGTCTTTCTATTATTGTAGAGATTCTGTAGTGAAGAGGTCTGAC	-23.5	258
ACAAGGCCCTCATCTTCAACAAGATCCACCACGAACTGAACCAGTTCTGCAGTGTGCACACGCTTCAAGA	-25.2	7454
CAACTGGAAGGTAGAATAGTCTTATTCAAGGAATAAGAACTATGTAATCACAGCATGGTGAAGAGTTAGG	-25.1	325
CACCATAAATTTTTGCCAGGAAGAATGCTTAAGATGTGAGTGGATGGATCTCAATGACCTGGCGAAGACT	-23.6	753
TCTTTTTTGGCCAGCTTTTCTAGATAAGGTTGTATTGCTACTGCAACTAACAAAAAAGATGTGGCAGGGC	-23.2	287
GAGACTTGATGCTCTGGTAGCTGAAGAACATCTCACAGTGGACGCCAGGGTCTATTCCTACGCTCTAGCA	-31.7	199
TTTGAAGTGCCCTTCTTGAAATTTTAAGCCCAAATATGACACTGGCCATTTTTGTAAACGAGACCACCAG	-37.8	698
CGATGTCAGGCATCAGATGACTGAAGACTTCCTGTAAGAGAAATGGAAATTGGAAACTAGACTGAAGTGC	-23.3	482
TAACCTTTATGTGTAAATGATTTTCTAGTGTGACCTTCTAATTTAATATTAGACGTCTAAGGTATATCTG	-19.8	104
CCCACGTGGACCAGTCTGAATGTCTTTCCTTTACACCTATGTTTTTAAGTAGTCAAACTTCAAGAAACAA	-22.2	138
TTTAACTTACTTAGATTTATTCTAGTTAAGCCATAAGTTCAACGTGTAAACTTGTTTTCATTAAAGAATT	-30.4	518
ATTGTAATTACTGAGTTGAAGCTCCAACCAATTTGAATTTGTTTCTTAACCTTGAAAAATCATTAAAGCC	-23.7	292
GGTTGAAAGGGAAAAAGTATGTTGAAAATTTAGACATAAATGAACCAAGAATATTCCTTATCTGGTGATG	-20.5	593
CTTCCTCTTAGATCATAGATTGGACCTGGTTTTGTTTTCCTGCAGCTGTTGACTTGTTGCCCTGAAGTAC	-26.3	119
CCAAGAGAATCACAGAGTCATTGACCCTATCATTATTTCACCAAGCCAATACCAGCCGCCATCCTTCTCC	-23.7	58
TGTTTTAATCAGAGATGTACATGATTGCCAATCTGCATTTCTTACCAGTGTGACCACACTGTTACGATGC	-26.1	1351
TATTGGCTGATTTTTTTCTGATCTTAAAGCAGAATGCCTTTTCTTTTTTTGCTTCAGTTGTAAAGAAGAG	-23.8	120
TTTTAATATGTCTGTTAGTAGTATGGAATATATTCCTGAGGGAGAGATTTTGGTTATAACTTATGGACGA	-63.3	961
GATTTTAAAAGGCTAAAGGAAAAAAGATCATCACTTGTAACTAAGATATACTAACCATCTTAGAATTTTT	-21.3	36
GTGCCAACCCCCTCTCACTACCCAGCAGCAGGCTGGGGACCTCCTCCCCCTCAAAAAAGGTATTTTTTTA	-72.3	76
AGCATCAACGAGGACACGGGCCTGCCGCTGGCCTTCACTGTAGCCCACGAGCTCGGGCACAGTTTTGGCA	-32.5	4105
ACCCCCTCTCACTACCCAGCAGCAGGCTGGGGACCTCCTCCCCCTCAAAAAAGGTATTTTTTTATTCTAA	-78.7	116
AGAAAATGAGCAAGAATCAGACATCACAGATGCAACTTCTTGTAATGGGAGATGAGAATGTACGGCTGTG	-22.4	2
CCACATTTGATAGAGATTCAAAAGACTCTGTGTATTCATCTTCCCTTCTACACACCTGAGGGGGAGACGG	-24.2	283
CCTCCTCTTGCTCCTCAAGTAAGAGGTGCAGAGATGAGGTCCTTCTGGACTAAAAGCCAAAAAAAGAAAG	-24.7	2773
GGCTGCAGGTATTAAGTCCAAGTTTATTAACTAGATATTTATTTAGTATTGAGAGTAATTTGTGAATTTG	-19.9	210
GCCATGTAAACTATTTGTGGCAATTTTATGTTTTTATTTATGAATAAAGAATGCCATTTCTCACGCCCTC	-25.3	36
CGGGGAGCCCTTGGAGGTTGACCTGGAAGGGGCTGACATCCCCTACGAGGACATCATAGCCACTGAGATC	-29.2	3559
ACCGGCCCGGCCCGCTCAGCAGCTCTGGAAAAAGAGAGACGGGAACACACCGGGAAACACTGGGAAAAAA	-31.3	545
ATTTGAACATCAACAAAAGATTGGTCCTTGGTGAAATAAACTTTTCAAAAATGAATGTTCTTTTCAAAAA	-23	397
GGGGCGGCTGTTCCAGCAAAGCTGCCCGACAGGCCTGGTGTTCAGCAACTCCTGCAAATGCTGCACCTGG	-27.5	228
CTCCCAAGCCCTTCTATTGAATACCACTGACTCTTTTAATATTAGTGTCCAGCCATTAGTCCTTCCTTCA	-22.2	86
GGTTGTAGTAGGAGCTGAAATCCATGCTGAGCTGTACCAGGAACTTGCATATCTAGAGACAGAGACTGAG	-24.8	63
AGGCACCTTTACGTCGGGCCCAGGAAGTGGCTTTCCAGCTGGCTCAGAATTGGATCCGAACCAATTTTGA	-28.2	327
CTCTGGGAACAGGCAGCTCCTATCTGCAAACTGTGTTCACCCTTTTGTAAAAATAAAGGAACTGGACCCG	-99.7	1
TTGAATTCCTGATGGGATAGTATCAATAAGTATTTAAAAGCCAGTATTCTAAAAATAATAAAGGGTAGGG	-21.6	530
CCCCCTCCCCCATAGACACACTAGTGGTCATGGCATGTCCTCATCTCCCAATAAACATGACTTTAGCCTC	-26.1	315
AAGGAAACCTCTGAGTCTACCTAATATGTTAAGGACAAGGAAACCTCTGGACAGTGGTATATTGGGGAAT	-23.4	1371
TTTGGATCTTGAATGTGGTCTCAGGATATCCTTATCAGAGCTAAGGGTGGGTGCTCAGAATAAGGCAGGC	-24.4	611
CCCCATCGCTGCCCGAGACCTGCTGTATTTTGACGGACTCCGAAAGCTCATCTTCATCAAGAAGAAGCGG	-25.9	645
TTGTTAACACGTGACACTGTGGGTCTGACTTTCTCTTCTACACGTCCTTTCCTGAAGTGTCGAGTCCAGT	-23.9	241
ATTTATTTATTGCATTTTACTTTTAAAGAGTTGGTCTTTTCTGTCTAAATAAAGAAAAAAGTTTAAAAGC	-22.7	3
TTCCTCCTGATGGAGTGTGCAGACAGCCATGCGTGGCCACGGGGGCAGTGTGAGGACCTCCCTGTCTCCC	-29.8	370
CCTGCATTCCAAAATGACTTTGAAAACCTCAGTACTGAAGAAAAATCCATTATAAAAGAAGAAATGTTGC	-22.5	1167
CCTGGCTGAGGGACATGTACTGCCTCTCATCTAGAATTTATTTTCCTAGCACTTCACCACCTCCTTCATC	-23.7	37
GTGAATGCTTCATGTGCTGCCTGCAAGCTTCTTTTTTCTCATTAAATATAAAATATTTTGTAATGCTAAA	-72.3	885
TATAGTATTTAACTTATAATAGTTAATATTTGTCTTTTTAAGATGACTGTACATGTAAGAAAAAAGCTTA	-21.7	18
CATTAGGTTCAAATGAAGAAAAATCGAAAACTCTTAAGAAATCAAACCCATATGGAGAATGGCAAGAAAT	-23.2	1343
AGCACAAGTCCTGAGAAGGGCCCCCTGAGGTGTGGTCGCTGCCAAGCATCAGTGTTAGGGCTGGGGCTCA	-27.5	329
ATCTGAAGATACTGCTCTGTTACTACTTAAAGAAATTTATCGAACAATGAACATTAGTCCAGAACAGCCC	-20.5	1589
GTAGCATGTAAACGGTTATTTCTGTTTCTTAAAAAGTATTGTTAGTGGGCTATTAAACTTGGATTTTTCT	-21.1	675
ATAGGGAATATAATGTATGAACTTTTTGCATTGGCTTGAAGCAATATAATATATTGTAAACAAAACACAG	-21.2	66
TATTTTCAATTTTGGAAGAACTAAAAGATGAATAAACTGGGTTTTTTTTGTTGTTTGTTTTTGTAAAAAA	-34	13
TCTCCTTAGCAGTAAGACTTGATGTTTTCAATTTTGGAAGAACTAAAAGATGAATAAACTGTGGGATTTT	-53.4	387
CATGGCACTATTAACAAAACTATACAATCATATTTTCTCTTCTATCTTTGAAATTATTCTAAGCCAAAGA	-20.8	194
ATGCCTCCCTTGGGCATCTTCATGCATCAACCAAATGGGCCATCAGGTACTTCATTAGTCATGGCAGAAG	-25.5	668
TGACTCTGCTGAGTGACGTAGGCTCTGAGATAGCTGTCCACGCCCACGTGTTTGCTTGGAATAAATACTT	-22.2	15
AGTAGGTCCCCATGGCTGGCAGGCCAGAGCCCCGTGCTGTGTATGTAACACAATAAACAAGCTTCTTCTT	-29.8	2734
AACGGTATTATACACCGTGACTTAAAGCCAGAGAATGTTTTACTGTCATCTCAAGAAGAGGACTGTCTTA	-23.3	696
CGCCCAGCTGTGTGTGCTGCTGTGTTGTGAACTCCGTGGTTTGAACACGAAAGAAATGTACCTTCTTTCA	-89.6	279
AGCCAAAAGGATTATTCATATTATTTAGATAATAGATTAAAAGATGAACGAATAAGTCAAGGACCTAAAG	-20.6	702
TCCAAAGTGAAGCCCATCAGCCTGGCAGATCATTGCACCCAGCCTGGCCAGAAGTGCACCGTCTCAGGCT	-31	365
GAAAGCACAAACCTTGGAAACCTAGAGGAGTCCTCTGAATAATGGATATACACCAAACTGGATACCCAAC	-22.9	472
CAAAAGTTACCCAAAGGGCTTATTGACTCTTTCTATTGTTAAACAAATGATTTCCACAAACAGATCAGGA	-24.2	150
GTGTGATATTTCAGAGTCTATTAAATAAAAATGTGAGTTTGAATTACACCATCTGTGCCAATTACAAAGC	-23	23
AGCCAAACAAAACAATCAAAACCTACCAAAAAGGGACTGGATTGTAATGTCCTCTCCATCATCCTCAGTG	-23.3	140
CCCAGATGCTGTATATTCATTTGTAATTATGTATAAAGTGAAGCAGTTTTAAACTGTAAAGATTTTTTTC	-22	133
CCTGGAAAATTTTGTGCTTCCAACGTGGCCTTCAATTCTTGCTTTTTTGCCCCTCGGAAGCATGGGGCTT	-24.9	122
ATTTGGCTGTGCTCAGTTACTATATTAAGATCTTGTACTGTGTAACAGTAACTCTTTTTTGCTTTTCAGT	-21.3	219
GCGGAACAGGGTGAGAGTTAATTATGCAGTCTTCTTGACAGCGGCATTAATTTGGAAGGAAACTGACAAG	-22.4	618
GTAGCCTAAGTGTTAGAGATGGTGAATATATTCCATTTTAGTTAAAGAACAAATTTCCTGAATTTTAAGC	-21.3	274
TTGACATTTAGGAGAGTCTCCTATTTATTCTCATACTTTACATTCATGCTTAGTATACTATAGAGGATGC	-20	2406
GAGGTGCATTCTTGTAGAAATTTGTAGCATGGTAGATCAGAAAATCCTCTTAGGTTTTAGGCAGGAAGGA	-22.2	417
CCCATCTGCCTTGTGGCCCACAATGGCTTTGATTATGATTTCCCCCTGCTGTGTGCCGAGCTGCGGCGCC	-29	311
GGGCGGGCAGGAAGCCCTCTCCCAAGATCGAGTTGGCCGAGGATGGATGATTGTGGCAGCAGAAGCCGTT	-27.9	979
CTCATTTAAAGGACAGTTTCCCATATGAGTAATTAGAAGTGGTTATATATGATGAATGCTATGCAGATGT	-21.5	44
AGAGAAGATCAGGGCAGCTTAAGTGGTCTAAGAATCCTTCAGGCATTCTTTAAGGAGAAAAAGGATACCT	-23.5	585
GGACTCGATTCTTTTTTACTACATATTTCCCAAGTTATCTTAAGATGTCTGTAAATTTAACTTTTATTAA	-27.1	212
ATATTCTGTGAGCTTCGATGAGCCAGAGTGATATCATAACCACCAGAAATCATACTCTCCTTTCTTAGTC	-53.1	721
GTGAACGGGCCTACCCCCTAATGATTTTTTTCTCAGACCTAATTATAATAATTAGCATTATAAAGTGCTA	-77	327
CAAGCTCTCTAAGATCCGAGTCGTCCGGAAATCCATTGCCCGTGTTCTCACAGTTATTAACCAGACTCAG	-80.3	211
GGAAATCCATTGCCCGTGTTCTCACAGTTATTAACCAGACTCAGAAAGAAAACCTCAGGAAATTCTACAA	-83.1	185
TTCTACAGCCATGTCCTATTCCTTGATCATCCAAAGCACCTGCAGAGTCCAGTGAAATGATATATTCTGG	-24.7	421
CAAAAGTGGAAATTTGAAAAATATTATGAAGCCTGAAGTGTAACTGATGTTTTTATATAGTAAACCCATT	-24	402
TCCAGCAGACAGGGACAAAAGTTACCGTTTTGCCAGCGGAGCCCATTGAAATAGAGGCCTCACATGCAGA	-24.1	870
GCCTACATTTTACAAATGATTTCTGGTTTCTCTTAGTTCTTCTCTAACATAGTACTTTCTTTCCAGCAAA	-23.3	199
TCCCTCCAGCTCTGCTTAGGCATTTTGCCCCTCACCCCAATGTTCCACACCATCGACAACCAAGGGGTGA	-25.9	360
GCAAACACCACAAATATGTTTTAAGTAACATCGCTCAAGTTTAAGTAACATCGCTCAAGTTGATAATCTC	-19.1	655
TGCATATATCCAAATTAAAAGACTTTTTGATTAAGTATATATCATCAGCTAAGAATGTATAGATTTTTAT	-20.5	144
CGGCATCTGTGACTCTTTATCCATGACCTCAGTGTTTCTTAACCAAAGTTGTACTCAGCATTTCTTAACC	-21.9	707
TGTAAATTTTAAAGTTTGACTGTATAAATTATCAGTCCCTCCTGAAGGGATCTAATCCAGGATGTTGAAT	-24	597
CTGGTCTCTTTGGTGACCTGTTTAAATTTGTGTACATTATTGTACATAGAATAAAATGTTTTCACATTTT	-34.9	726
CTCTGTATGCACTTCTCAGAATTGGAACTCTTGATTAATGCTGCTGATGACACAGTTTTGAAGGTCACAG	-22.8	700
CACCTGCTATCAAATCATCTAAGCTGAAAACATGAGATGCGCTTGGAAAGGCCTAGTCAGAAGCCATTTC	-23	576
GGCAGGTGATTAACTTAAATATCTCAGTTTATACAGTGGTTTAAAAGACTTTTGTTATGGTAATAGGGAG	-19.8	175
AGAGAAACTTGTCAGATAGGCTAAAATCTAGATAATTCTACATATTCTGAGGAATTCATGCTCCTGTGGC	-21.8	2104
ATTGTCACTTCCCACCAGGATGCAGGACTTGGGGTTGAGGTGAGTCATGGCCTCTTGCTGGCAATGGGGT	-27.7	189
CCTTTAATTTCTTGCTTGAAAATCCCATGAACATTAAAGAGCCAGAAATATTTTCCTTTGTTATGTACGG	-22.2	555
TTCAGTCTTATTGGTAATAAAAGGGAACTTAATTCATACAGGTACTTGATACAGTTATACATTTTCCACT	-20.8	203
AGCGAATCTGCAGAATAACTGTCAACGTTTTTCATTCTTGTTTTACAAACCTATTTTTTAAAGTGAGAAT	-21.6	567
GGGCAGGGGATGTCGTGAAGATGGCAAGAAGAACACAGTTTCAAATTTCTGGAAAAGAGCCTGTGGTGGA	-23.8	93
CATGTGCAGCGCGGTTATTGATTTCAAGCAAAGAGTTTTTATGTCTTAATGTAACTCTACAGTGGGTGTG	-22.4	40
TTCCCCAGCCCTTTTCCCTGGCCCTGGCTTGGAGAATCTGTTTTCAATCTCCACTGATTGCCCCCTTGCT	-30.4	466
TTTTCTTTTACACGTTTAAAAACTTCTTAAAGCACTCTGTAATATAATGATTAAATTGCTCCCTTTTATA	-22	284
AGTTGATTCCTCCAATATGGGCCAGATGCTTTTGAATGATAGGGAAATCTACATAAAATCCAGTGTCCTC	-22.9	227
CACTTCCCTGGGCTCTGCAGAGAACACACAGAGAGAAGACTTTCAGAGCTCACAGGAGCAGGGAGCAGGA	-26.7	1708
GCACGCCAACGCCGCCCAAGAGCGCGCGGTGCGCCGCGCAGCCCAGGTGCAGCGGCTGGAGGCCAACCAC	-30.9	924
CTGCTTCCTCTCGGTGATATTTTTTCTACGCCAAAACAGACGGGAAAGGGAACAAAATAAAGTGAAATCC	-24.6	121
TCAACCCCAGTCCGCGAGTTTCTTTCTTGAAGGTGTGGGGGCTAGATTCATTCACGTGCTTCGTAATGAA	-23.3	327
GGATTGAAGCATTTTTAAAACTTGAGATTTTTATCATACCTCCAGCAGAGTAAGGAGTCTGTGTGATCTT	-22.4	219
CGGAATACTGCCCTTCTTGCTTGGAAAATGATCAGAGATGGTTGTGTAATGAAAATTACAAGGTCGTTGA	-23.7	3627
CCGCTGATTGCTGACTTTTGTGTGAAGAATCGTGTTCTTGGAGCAGGAAATAAAGCTTGCCCCGGGGAAA	-24.2	13
AAACCGCTGATTGCTGACTTTTGTGTGAAGAATCGTGTTCTTGGAGCAGGAAATAAAGCTTGCCCCGGGG	-24.2	3471
AGTTGGCAGGAAAGTGACGCCATCCCTAGGAGGATCTCTGTCTTGAGTTTCTCCTTCCCCATCAGCTGAA	-25	156
TTCAAATGTTTTACATTACTTTAAGAATCTTTACTTGATATAAGAACAAAGTATAAGGGTTTAAAAGTTG	-21.9	982
AAAAGGTGTGCCCTGACTACAATTACCATAGTGAGACCCCATACTTATCTTCTGGCTGATCTTCCTGCTG	-23.8	30
GGTGGAATGGCTGCAAATAAAGGATAATGATTTCTCCTATCGACCCAACATGATTTGTAACTTTCTACAT	-71.4	311
TTCTGGTGGAATTATCAGGAATTATTGATTCAGACTTCCTCTCAAAATGTGAAAATAAATGCAAGGTTTT	-70.3	586
ATCCGAAGGAGAATCCAGCCAAGCACAGTCTACGTGTGCAATGAAAACCAGTCTGCGGTTTAGGGGGTCA	-24.7	483
CAGGGACCGAAAAGTTGGTGTCAATGAATTTTGCTTGGTGGATGAAATGTCAGTGGAAGAAGCAGATGAG	-23.7	699
TTTCTGTGCTACGGATTTACCAAAAATTGTCAAGTCTTTTTCAGTTTAACAGTTCCTTTACATGTGTAGT	-20.6	41
AGTCCGTCTAGCTCACGGGCCCCTCCAGTGGAATGGGTCTTTTCGGTGGAGATAAAAGTTGATTTGCTCT	-27.6	6
GTAAGTTTCAGGAGATTGTTAATTCCTCAGTTATACCAGATTTTATAAAATATTTGAGAATAGATGGCTA	-20.9	513
TCTGCCTGTGCCCGCTGCGCTGCCCTGCAAACCGTGAGGTCACAATAAAGTGTATTTTTTTATTGGTGCT	-31.7	1313
CCCCGTGTCTTGGCAAAAGAACAGTGATCACACAGATTCCTACTTGGGCTCTTTCCTTTAATCTTCGGAG	-22.8	402
GGCAGCTTCCTCCTCGAGTATCTTGCATTAGGGAATGAGTACTCTTTCTCGAAGGTTCAAAGAGTACCTT	-22	23
GTGGGCTTTGCCCAGTTCCTTTCTGTGCTACACTTTGGCCCTACAGGACCAGTGTGTGGAAATCACTGAG	-25.9	885
TAAGGCATTCCAAATCCCAGTCTTCATGTTGAACTGGGTTAAGCATTTATTAAAAAATCGTTTTCTTCTA	-23.8	27
AGAATAACTGGGAGATGAAACAGGAAGCTCTATGACACACTTGATCGAATATGACAGACACCGAAAATCA	-88.6	251
TAAAGACCATAGCAGTGGAAAACAGTGTACTTTTTAAAAAATTGCTGAATATAAAATCTTTGAAAATTTT	-52.2	199
TATAAAGACCATAGCAGTGGAAAACAGTGTACTTTTTAAAAAATTGCTGAATATAAAATCTTTGAAAATT	-51.6	406
TTGGCTACAGAACAAGAAAAATACTATTTGCCATGCTATTACCTTGGCAGATGTGTAGGTGATAGTCATC	-23.6	258
ATGAATGAGGAATTCTTTATGAAGTATCAGTCAGATTTTATGATTAAGTGATGTAATATAGGAATTATGT	-34.4	195
CCATGCCTCACAGCTACCCCTATGTAGCATTGCAGCTGTTTGGACGGTCATCTGAACTTGACAGACATCA	-23	318
ACAAAGCCCTGTCCTAATTTATCTAGCTTGTCAGTCCGGTCTTAGAGATACCCTCTTTCCTGAAGTGAGG	-23.5	129
TTCTTGCCTTCACTTTCCCACTTCCGTGGCCACCTCCATGCAGAAGCCCTAAGCCCACATTCTTTCGATA	-27.4	127
ACTTTTTAAAAAACACTAAGTTCCTTATCTCAGATGCTGTTCTACTGGAGAAGTTCTAGATTCCCACTGT	-22.9	818
GGCAAGCTCAATGTACATCTTATTTCATTGAACCTGTACAGTGGATGGAATCTGCTTTGTTGGGAGTGAT	-24.4	480
AGATTACAGCTGAGGAGGCCAGAGAAGCCCTCCCCTGACTGCATGTGGAAGGGCACACAGCAGCAGGCAG	-33.8	659
GCAAATGATGGGGGATGGTAGAAAAAAATTATTTACACAACCTTGGAAGATTAGGCATGAATACACAGAG	-22.5	13
AACAGCCTCCTGAGAAGGAAAGGATCTGCCCTGACCACTCCCCTGGCACTGTTACTTGCCTCTGCGCCTC	-26	263
ACTCTGAGTCTTCCAGCATCCTTCAAGGTCACCGAATGACCAGAGATCAAAGTACCTTGCCTCAGGGCCG	-24.7	46
TCCAGCCCTGGAGCTCCCGGACCTATTGCTTCTGGCCGGCCCTGCCAAGGAGAACGGACACCTGCAACTC	-29.7	379
ACCCCTAGGATGGCTGCTTTCAAGTTGTTTGCAATTAAAGATTCTGTATAAAACCAAAAAAAAAAAAAAA	-53.6	1
ATCAGATGGTCAAGTGTGACCCTCGCCATGGCAAGTACATGGCCTGCTGCATGTTGTACAGGGGGGACGT	-97.5	469
TGGGTTCTCCCCTGCCACCCCCGGGATGGCTGCTTCCAAGTTGTTTGCAATTAAAGGTTCTGTATAAAAC	-77	27
CAACGACCACCCCGACGAGGACACCGTCAACTCTCTCTACCCCGATTTCCTTCTGTCAGCCTGCAGGAAG	-25.4	180
GCCTGGGACTCCCACCTTCCTATCAATTCTCATGGTAGTCCAAACTGCAGACTCTCAAACTTGCTCATTT	-25.9	19
AAGGGACAGCTGCTTGGGTTCTAATGCTCCTGCTCTCTTCTCTTTCCCCTCCAACCAGTTCAATCTCATC	-28.8	516
TCCCCCGCTGGAGACGGAAGATCTTTTATTTTCTATTATTTATAACTTCAGACTTGGGCCCCCTGTTCTT	-44.9	136
CTGGCTGAGTCCTCGCAGTCCCCGGCAGATCTTGAAGAAAAGAAGGAAGAAGACAGCAACATGAAGAGAG	-25.4	1601
CTGAATATCAGTGCTGTTTGTAATTTTTCACTTTGAGAACCAACATTAATTCCATATGAATCAAGTGTTT	-91.8	118
GCAGTCCCCGGCAGATCTTGAAGAAAAGAAGGAAGAAGACAGCAACATGAAGAGAGAGCAGCCCAGAGAG	-25.3	1566
GTCATCCACCATGTGCAGTAAGAGGTGCATATCCACTCAGCTGAAGAAGCTGTAGAAATGCCACTCCTTA	-25.4	280
GAACATTACTGCAGGTTTTTGATGAATATAATGAATGTATGGAATTCAATTGAATTTGCATGGTCTTCGG	-20.4	321
ATCCAGATAAAGCGGGTGATGACCTACCGTGACCTGGACAATGACCTCATGAAGTACTCAGCCATTCAGA	-23.8	357
CACACCATTTGTGTACGTGGAATTTTGTGTTTCAGTGTTTGAACCTAATGCAACAGCAACAAAGCCACTG	-22.9	235
AGATCCGGGGCTGCATTGAGAAACTGTCGGAGGATGTGGAGCAGGTGAAAAAACAGCATAGCGCCATCCT	-28.5	1471
GCCGCATGCAAAGACTGTGACCATGGAGTTTTCTCAGACAAGATTTGGAAAGGCAGTGGAATGAAATCTC	-23.6	311
GGGCACCAGTATCACGCCAGCTGTGCCAACTTCTGGATCAACTGTGTCGAACCAAAGCCTCCTGGCCTCG	-26.5	1130
ACTGGGTCTGCTGGCCATCCTGACCTTGGCAGTAGCCACACTGTATGGACTATCCCTGGCCACACCTGGG	-26.9	1108
TATTGATAAGGTCCCCTTGGTGTTGCCTTCTTGCATCTCCACACATTTCCCTTGGATGGGACTTGCAGGC	-24.1	72
AAGACCATATCCTCCATACTCCTTGGCCGATTTCTCTTGGAACAACATCACTGATTCATTGGATCCTGCC	-22.1	1115
CAGAGGATGATTATTCCAGTCTATTCTCAGAGATTTAAATGAACAAGTGTTATTGTTTTTAATGGTGTCT	-21.6	241
TACACAGCTGTAAGGTCACCTGGAAATGTGAACAACACTATTGTCGTGCCGCTTTTGGAGGATGGGAGAG	-24.2	10612
TTCCTAAATGGAAAGAGCATAACAATGTAGTTGATTGGTAAGATTTACAGGGATTTGGTTTCTGAGTTTG	-23.2	713
TGACTGTCCTACAATATCATTTTCCTGGGAGTGGGAGTCAAGTGTGCCTGCTATCCAGCCGCAAATCCAT	-25.7	591
ATACATCATTTTTGTTTGATATTTTCCTGATGCAAGTATGTGGTTTATCACATGTAGCTCTTTTGCATGC	-21.9	220
GGCACTGTTCACTTTTCCTTTATTCTTAATGGCCTTCCTCTGTTGCAACCTCAATAAACAGCACAATCTC	-24.9	0
ACCTAGACCTGGACAGCATCATTGACGAAGTCCGCACCCAGTATGAGGAGATTGCCTTGAAGAGTAAGGC	-45.3	1265
GGGCAGGAAATGACCGAAATTGCTGAGAAGCTGAACTATGACCGAGAAGTAGTTAGAGTTTGGTTCTGCA	-22.5	214
CTGGCTGGTGCCCAGGAAAAATGTCCAGCCCAAGAGGCTATGTGGCAGATGTGGAGTGTCCCTGGACCCC	-30.2	370
TCAGATTGGTAAATAATGACACCTGGTGGATAAATGTTACATTCTAGAAGACTATTCTGGTCAGCCTAGG	-21.8	149
AGGCCGTTTTAGAAGAGCTTTTACTTGGGCGCCCGCCGTCTCTGGCGCGAACACTGGAATGCATATACTA	-24.5	114
GAGGACCAAACAGAACCTCGATTACTGCTTCCTCATGATGTACGCGCAGTCCAAAGGCATCTACTACGTG	-21.9	1346
CCCACCCACCTACCTTTGCATCACCTACCTTTGCACCAACTACCTTTTCAGATTTCCGGTAATAAATCTG	-25	195
TGTACTGCCAGTTCTCCGAGGGCTGAGCCCCGCCCAGCTCCCCTCCACAATAAACGCTGTTTCTCCTTGA	-30.8	771
ATACAGGGGTCAAAACCAGACTAACAGTTTTAGAAAGTGAAAAAAGTTAAAAAAGAAATGGGGGCAGTGG	-33.7	367
TACAGGGGTCAAAACCAGACTAACAGTTTTAGAAAGTGAAAAAAGTTAAAAAAGAAATGGGGGCAGTGGG	-35.1	911
GCCCGAATTGCCTTACAGTATCACAAAGGGCTTCTGGAACTGAACCAGATGAGAGCCTTCAAAAGCAGTG	-23.8	445
TGTGGGTAGTGGGGAGGGCTGAACAGGACAACCTCTCATCACCCCCACTTTTGTTCCTTCCTGCTGGGCT	-26.3	280
GTGTACTATAAGGCTAGTACCTGCTTTGTTGGGGTATGGTTGGCTCGTGTGCATTAAGTCAACAAATCCC	-25.1	328
GATGAAGTCTGGTTTAAGGCACAGGTAAACTGAGTGTGGATGCAAAAGTACCAGGAGCTAGCTTTTAACC	-24.7	1493
GCCCTTCCTCCATGTGTTTGTAAATACTCTGGCATCCTTTGGCCCTGAGAAGGTTTTTAAATGTGTTATT	-24.2	68
CGTTCGCGGAGCGAACACAACTTAGTGAACATCCAGAAGACCCATGAGCGGATGCAGACAGAGAACAAGA	-25.6	832
GAAAAAGTGTTTGTCTTAAATACGCCAATGTAGTTTTCCTTCTTTACAATGTATTAAACTCGATCGATGA	-21.1	63
CGCCAGCTCCCAAGTATTAGGGCAGAGTAATCAATATGAGAAGCCACAACGGGTAAGCTTTCTGATTTGA	-21.3	486
CGGGGGCGGACCTTGTGAGGCTCAGTTGACCCGTTACTTGCAACCTGAAAACAAATCATGTTTTTGACTT	-25	24
ACGTTTGTTTTAATGGTCTTTCTGATTAAAGAAAGCCCCTGTGGCTTTGGAGGCATTGTGCCCACGGTCC	-52.5	234
GCAACTTCTTCCTCCTTATAGTTCTTATCTGTGATTCTTCCATAATTTTGTCCTTCTAAGCTTCTGATGC	-22.4	116
CCCCCCTGTACATAATTTTTAAAACCTTTTTTTAGCGAATGAAATATTGAAGTATAAGATTCCTTTTATT	-22.9	1818
TGGCAAATGTGAACCATGAGAATATCAGTGATACTGATGAGAATAAACTAAACGCCTTTGTAACAAAAAA	-58.4	60
CGTTGGCAAATGTGAACCATGAGAATATCAGTGATACTGATGAGAATAAACTAAACGCCTTTGTAACAGC	-35.3	526
TTCGGCAACGAGAACACTATCTCAAGCAGAAGAGAGATAAGTTGATGTCCATGAGAAAGGATATGAGGAC	-21.5	224
CTTTGGGGCGGGATGGCTGCGGAAGAAGAAGACGAGGTGGAGTGGGTAGTGGAGAGCATCGCGGGGTTCC	-24.5	1117
AGATGGCAGGAGCTCCAAGCCAGCAGCAGCCAATGCTCAGTGGGGTACAAATGGCTCAGGCAGGTCAACC	-32.1	1191
AGAGCTAAGGTGGACAGGGATTACCTAGATTGGATCCTACTTGGGCTATCACAGAGCATTGACCATTGGC	-23	284
GCAAGTAACTAGGGTTTATTCTATATAATGAATATTTATAGATCTGTAACATTTGTTTCAAAATGCTGTT	-20.8	901
GTTGTAGCAAACATTTCTGTAAATTATCACAAGCTCTGTTACCTTTATATACGCTGCCTCTTCAATTTGG	-21.7	38
CCTTGGCCTCACTGTACCAGTGGTTCCCTCTCTGCCCGGATTCTGAGCTCAGTGTGGTGTTTGGTGCACA	-26.6	291
CCAGGAATACCAGGACAGAAGGTTTTGTTCAGCTGCTTTCTTTATTAGAAACAAGTGAGATGTATTGAGC	-25.4	309
GGTACAGAAGTTCCAATTCCCTTTTTATTTTGCTGGTTGGTATCTGTAAATGTTTAATAAATATCTGAGC	-22	155
TTGCTGGCCGCCCTCGAGCGCCGCCACTGGCTGAACTCGTACATGCACAAGCTGCTGGTGTTGGATGCGC	-29.1	61
TGAACCCCGTGTGCTATGCTCTGTGCAACAAAACATTCAGAACCACTTTCAAGATGCTGCTGCTGTGCCA	-25.2	279
GCCATCTTGTTCTGGCAATACTTTGTTGGAAAGAGAACTGTGCCTCCGGGAGAGTGCTTCATTCAGTTCC	-23	499
TAACAGTTTATAACCTGAACCGCACCACTCCTGGAGTGAGGATTGTCCTGGGAGGCACCACAGTGCACAA	-29.9	708
TCCTTTGTTCCTTTTTACGTTTATACTCTGTTCTTCTGTACATAGAGCTTAAAATAAACATTCTTTTTGA	-21.2	241
AGTTGTGTCTCGTCTTCTGTCTCCATGTGGTTTTTGGGTGTTTTTCTTGTTGTGTCCTGGATTCCGATAA	-77.2	47
CCTCTACACGGCCCTCACCTGCCCCCACCCTCTGGCTGGCATCGTGGCGTTGAGCTGCTGGCTGCCTCTG	-88.7	1083
GATGCAGAGTTGAGATCATCATTGCAAAGTTCTCTGTTCCTGAGGAACTAAATTTAAGGAAAAAATGGGA	-22	51
ATTACAGTGTGATAAGGAAGACATAGGCTTTTGTCCTGCCTCGCCATCGGAGCTCTCATGGGCCCCAGGA	-25.2	746
TCAGGCAGAGTGCGGTATATTCCAGGAAACACTGTTTCCTACTCACTTAGCTTACTTCTTTGTTGAATGC	-22.7	288
ACAGTGGTAGGTTAATGTGTTCAGAAGTCGCTGTCCTTACTACTTTTGCGGAAGTATGGAAGTCACAACT	-26.2	82
CCTGGAATAGTCCAGAGCTCAAAAATTCTTATGATTATTAAAGGTATAAAAGGACAGGTAAATTGAGGCC	-22.1	116
AGGCGGCCTGCCACATGGCCCAGGGCCGCTGGGAGGCCGCTGAGGGCCTGCTGCAGGAGGCGCTAGACAA	-31.7	358
CCTAGAGCACAAAGACCTGCTCCTCCCGAGACTCTCTCTGACTGCAGCCAGGCATAGTACCTTTGCCTGT	-26.7	303
CGACGCGCTCCTGGAGAGCATCCATCAGGAGTTCACGCGCACCAACTTCCACCTCTTCATCCAGACTTAG	-25.5	863
TTCCAGGCAGTCCCCCAGGAGGGGGTGGCACCTACTTATGCCTTGCCACAGAGAAGGTGGTGCAATTTCA	-27.5	1541
CCCAAGTTTGAAGGTTCAGACTTAAAACCTGAATTGGAATTACTTCTGTACAAGAAATAAACTTTATTTT	-21	165
AGCCCCCACACTTGGCCAACCTGACCTTGGAAGATGCTGCTGAGTGTCTCAAGCAGCACTGACAGCAGCT	-29	643
GCCGTGTGTGGCCCCTCGCCGCATCGTTGGGGTTTTGTTATGTGAAAATATCCTGGAAATAAATACATGT	-27.1	12
TGGACTTCCGGGCCTCGATTTCTTCCGCACAAGCCTGACCGTGGATTTCAGGGACACATACCGCCTCCAG	-23	169
GAGAGCAGGCCCTCAGTGTTGTACTATTTGTCTCGGTCCTTGTGTCTAAGGAGCAATGCAGAAAAAAAGG	-24.9	159
CATTTTTCTGATGCATTTATTTAAAATTTGTACTTTTTGATAGAACCCTTGTAAGGGCTTTGTTTTCCTA	-23.4	34
AACTGAAGTCTCAGAGAGCATGAAAGCTTTCATATCCAAAGTCTCAACCCACAAGGGAGCAGAGCTGCCT	-25.8	851
TGCGGCCAACGTGGCCCGCAAGTTCGCCAGCATCGCTCGCAACCAGGTGCGCAAGAAGCGGCAGATGGCG	-24.3	264
GGTGGATCCAAGTCTCAATCCCATTTCAGCCTTTCGACTTTCAGTTATTCAGAATTCTGCTGTTTGGGCC	-26.1	413
AACATGAAATGTGTTTTCCCCTGTGTACTAACACATTCTAGGCAAAATTCAAACTTATAGTGGTAAAGAA	-31.7	671
AACAATAAATAGGAGACTTTAGCACACTTCACTTGTTTCTAGAAGTCCAGAATTTTGGACCTCCACGTGA	-21.7	805
ACAGTTTCGCCTCTCGAAAGCCGCAGCTGCGCCTAGGCTGGAGCTGGAAGGGTGGGTGAATCCGGCTTGG	-34.8	94
TAGGGGAACAAGGGGATTCAGGAGAAACCAGGCAGCAGGGGATGAAATACATGAATAAAGAGAGGCATCA	-29.7	147
CGGGGGGCGTCTAGCATTAGGCCTGGAGAAGGGTCGGCTCTCTGCATTGGGGAAGATGAAATCGACTTGC	-24.3	241
AGGAGCTATTTGGGACAGGAGTCAGTTCTCCCTTTCTGCTATCCATCACTTATAACCCCACAGGCCAGAG	-24.8	314
GATCCTTGGCTATGGCCTACCCACTCCCCTGGCTGAAGAGTGCCAATCATTACAAATCAGCTTCAGCAAA	-28.4	4388
AGCCATCAATGATGGGCACAATGTTCTTGCCGCAGCTTAAAGCAGTCACAATCTCCTGGAGAAAGAAAGG	-24	1495
TGAGATCGCCAGCCTGTCAGGCAAGCTGAAGGCGCTGTTTCTGCCGCCCATGACCCTGCCACCCCATGGG	-27.5	317
AAGTCTTTTGCTGAAATGATTTTGATGATTTTTGTTTATCGTTTATAAAAAGGAAAAGAAATATACAAAC	-23.1	83
CCTTGATCTGTTGGAGGCTAAAAGTAGGTATAAATGATATTGAATGTTGGGTATAGTGATACTCTGCCAT	-22.1	1382
TCCCATATGTTAGTAAATTACATATGTACAAATTGAAACTGTAAATTGTGAACACTGGAAAGCACCATTG	-32.9	2541
ACGGGAACTTCGCTCCAATGTGGTGTCTCCCACCAAAAATGAAGACAATGGAGCTCCTGAGAACTCCGTT	-31.9	665
CCAGGATCATTTCTCTTTCTTCAGGGCCAGACAGCTTTTAATTGAAATTGTTATTTCACAGGCCAGGGTT	-25.8	1003
TTCTCATGAGATACTAAATATTAATTGTGTTGTACATTTGTTCTTAGCATATATTAAAGTTTTGAACCAA	-21.1	263
AGCAAAATCTGTGGTGTTTGACATCACTTTGTCATGTGGTTACAAGTAAAACAACTGTTGCATTCACTGT	-22.5	1742
CCTAGTAGAAATAGTTTCTGTACTTTAGCAGAACAGGAAGGATATTTGTTCATTAAAGGTGGCTTGGTCT	-95.6	122
CAAAGACAGAATCATTGTATAAGATATTTATTAAAGGAGAGCCTCTAAGTCCACATCCTGAGCCCATGTG	-95.6	499
CCCTGGAAGTATTCTCTCAAATGGAGGCAACAGAGGTGATTGTTATTTTGTTTTAGTTTCTGTTTTTCAT	-26.1	1209
GGCACTTATCCTGAAGTCGTCAATGATTTCCCTTTGAAACTACTTTATTTTACTAATTTAAACTATTTTG	-83.4	104
GCGCTACCACTACGTGGGGACGTTCCCCGACGGCCAGAAGTTCGACTCCAGCTATGACAGAGACTCCACT	-29.5	3051
CCAGCCACTTAGTTTTTTCTTATTCCCACCTTTCTATCCCATAGAACACTCTTTTTTATCTTCCCTGAAC	-74.2	453
TGCGCAGCGGCGACTTCGTGCGCTACCACTACGTGGGGACGTTCCCCGACGGCCAGAAGTTCGACTCCAG	-29.5	840
GAAACTACTTTGGATTTTAACCTCTTAGAGGAAGAAAAAAGGTTAGGGAAGTGTCAACTCTGGATGAAGG	-22.1	275
GGATGAGCAAGCTGATTCTGGTTTGTATATTTTCAAAAAGAAGACATCTCATTTTGAGTCCTTGAAGATT	-21.6	664
TGCAGCTGTGATTTGTTGCTGGGAGCGGCGGCAGCGAGTCCCTGCAACAGCAATAAACTTCCTTCTCCTC	-34.3	63
TTAACTGGGGCTGTTGGGGACAGTGCGTGATTTCTCAGTGATTTCCTACAGTGTTGTTCCCTCCCTCAAG	-34.6	331
AACCTACACACCAAAGCTTTATTTATATCATTCCAGTATCAATGCTACACAGTGTTGTCCCGAGCGCCGG	-21.5	98
CGGCGGCGGCTGGCCCAGGAGGAAGAAGTCGAGCCCAAGCTATTTCCGGTTCCGGTGTCAGTTCGAGGCG	-31.7	1291
CTGACTGACCTCAGGGCCTCACCTCTCTGCCCTTCCCTGCCCGGTTCCTACTCACCTGGCTAGGGCCAGT	-50.3	441
GCACTAGAACCCCTGGGTAGGGAAAGAAAGGAGGGAAAAACCATAAAAGGAATACTTATAATGTGAAGGT	-25.3	186
CAGCAGGAGCTGAGCAAGCTTTGGTGCGGCCTCGGGGCCGAGCTGTGCCCCCCTTCGTATTCACGCGCCG	-28.3	1424
GGCTCCCTCCCCCTTCGGATGTGGCTTGAGCTGTAGGCGCGGAGGGCCGGAGACGCTGCAGACCCGCGAC	-33.6	1752
GTTAAATGAACATTTAAAAGTTTCCCTAGCGGGCCATTCCTTAGCAAAATGTTGGAATCCCTGTTGCTAC	-56.5	325
TTGAGAAGTAACTGAGAAGTAGAAGCAGCTCTTAACAAGCATCAGGGGCTCAGAAGAGGTAGCTCTTCCC	-27.8	926
AGTTCGTGTACAAAGAAGAGCATCCGTTCGAGAAGCGCCGCTCTGAGGGCGAGAAGATCCGAAAGAAATA	-34.6	746
TGAGCTTGGCAGCCCCGAGTCTCACCTCGATACACCAGGTGTCACAGAGCATTTTCTCATGCTGGGCCGT	-24.2	277
AGACGATGGGCAGAGGAGTGACAGCCGCAGACACACGACAGCCGGCAGCAACTGGAATGGCAGCAATTAA	-27.8	500
CCCGTGGTCGGGAGCCAGATGACCAGACAAGCCCGGCGCCTCTACGTGGGCAACATCCCCTTTGGCATCA	-26.4	1603
AGTGTGTAAGACGCTCACGGGCGCGCGGACTATCGGGCGGCTAGGCTCTCTGAGGAGGCTGCCACAGTGA	-27.8	1367
ATCCTGTACCAAAGCTTGAGTGTCAGGTTCAGGCTTTATTGCTGTCTTCAACAACAGGTGCTGCTTAGTC	-27.4	568
CTTCTCCCTTTAGTTCTGCTGTCTCCCTGAAGAGTGAACCCTCTTTAGTAAATGAAACTAATCACTAAAA	-22.9	369
CTTGTCTGGGTTCTATACTGTGATCTCATTTGCCTCGACTACGATGGAAACATTTTGGATGCCTGCACAT	-28.4	704
GACCGTTTTGTACTAAGTCTCATTTTGTATACTGGTAAAAACTACATGCTTGATTAAACCATTAAATGCT	-20.7	312
CGCCTCTCTTGCTACAGAAAGATACTAAAAGATCACAACTGTCACAACCTTCCGGAAGGAGTAGCTGACC	-21.8	526
CAGAGATGCAGTGGCTCTCCATTGCCACTCTGATTCCTCCTTTCTTTTGGTCACAGAGAAAGGGTACTTT	-26.4	245
GCGATTCAGACTCTGACACAGACAGTAGTCAAGAAGAAAATGAAGTGACAGAACATACCCCTTTACTGAG	-34.9	1263
TCTTAATAAATAGCATCTTATGCTAATTAGCCCTGCTAAACTATGTACAGAGGAAACTGTTCAAGTATTG	-77.8	300
ATGAAATAAACATGTGGGTCTCTCAAAGGACAGCCACGGCAGGAACTGCGTCCCCACCCTGAATGCATTG	-25.8	95
CATTTTGTGACCCTTCCCTGTTGCTGTCCCTGCATCTCGTCTGTGTGCCCAGGGTGTCCGGGGACCCTGC	-26.3	196
CCTGGAGGCACAGATTCCCAGGAACCTTTTTACCATTATTACAATTGGCTGCAGCACCTTCAAGTCTAAA	-26.1	1308
GGGCCCTATGGTCCTACTGTGGGTGGTGACTTGTCCTGCTACCATGTTGACAGAGCCCCAGAACCCACAT	-25.2	796
AAGATGGATTCTTATATGTGGCCTACAGCGGAGAGAACACTTTTGGCTTCTGAGGGCCATTGCTGGGCTA	-30.1	454
CTGCCCTGTAAATAGGACCAGTCTTACACTCGCTGTAGTTCAAGTATGCAACATAAATCCTGTTCCTTCC	-21.9	703
AGGCCCGATGGCCACTAGGACCCTGCAAGCAACTCTGCTCTGTGACCAGGCCAGGATTCCTGGAGCTGGC	-27.7	255
CACCCCCGGGATGGCTGCTTCCAAGTTGTTTGCAATTAAAGGTTCTGTATAAAACCAAAAAAAAAAAAAA	-55	2
TGGGTTCTCCCCTGCCACCCCCGGGATGGCTGCTTCCAAGTTGTTTGCAATTAAAGGTTCTGTATAAAAC	-77	1
AGGATACCAGGATGTTGCTAAAGGTGAGGGACAGTTTGGGTTTGGGACTTACCGGGGTGATGTTAGATCT	-23	488
TGGGCTATTCCATCCATCTGGAAGCACATTTGAGCCTCCAGGCTTCTCCTTGACGTCATTCCTCTCCTTC	-27.2	603
CATGAAAAAGCAGAAGCCCTGCAAGAAGAGGTAGAAGAGTTACTAAGATTGCCTTCTGATTTCCCTGGTG	-26.3	234
GTGTTCCTTTCAGTAGTTGCCATCTTGGCCATGCAAGAAAAGAAAAGAAGGCATTTACTCTATGTCGGGG	-28.5	325
AGAAAAGTCCACAGAAACATCCGATCAAGAACCTGGGCTATGAATTTCCAATCTTCAACAACCTGTTAGG	-23	62
CATGTTTTTGTTGCTTAAAGGTGATAAATCAGTGTATATTATTTGTTAATGTCCATTAAAGCCAGTTTTT	-22.3	1188
GATGCCCAGTTGTCTTGTGAATGACTTTTAAGAAGTGTACTTAAGAGAAAAATCCTACCTTATTTGAATA	-22.3	187
ACTTGGACCTCCATGCGTGGCACTCACCCGCAGTCTCCTGGACAGGCGCTGTATTTTATTCTGTCGCAGA	-26.1	743
ACCTTCTGCGGGACGTGCTAGCCGTGCCGGGGACCGTGTGGACGGCAGGCTTTGTGCTCACCTACAAGCT	-26.7	834
TGAAGGAAGCCCTCCTGGACTGCTTCTTTTGGCTCTCCGACAACTCCGGCCAATAAACACTTTCTGAATT	-31.3	275
AACCCCTTTTCACGTCAGCTAGGTTGCAAGGATAATAATTTTAGTAATTTATTTCCTACCGCCTTATACT	-20.9	406
CTTGCCGAACTCCTGCTGGCCCACACAGACCTGAAGTCCCTGGACCTGAGCTACAACCAGCTGAATGACC	-112.5	1263
AGGAGGTGCCTGAGAGCAGAATGAATAATTGAGGTTAGGAACCCGGCATGCCGAGTGCCCCAGAAATGCC	-25.2	439
GGCTGGGATCGGAACTTCCTGCTCTTGTTTCTGGACAACTTTCCCCTTCTGCTTTAAAGGTTGTCGATTA	-25.7	5
CGCCCCAGTTGTCACCTTCGGCATCAAACACTCTGATTACATGACTCCCCTGCTGGTTGATGTGGAATAA	-25.6	223
GAGATCATACCCTAGGTACTGTTTAGTATGCAATATTTTCATTTTCGCAGTATAATAATTGCACCTGTTA	-22	23
TCTATATACATGTTTTATATACCTCATTCTGACACCTGCATATAGTGTGGGAAATTGCTCTGCATTTGAC	-23.9	1169
TTAAAAAGCTGACTACTTGATATAATTACTTAATGTGATGCTTGATATAATAATTACTTAATGTGGCCGG	-20.1	806
GCTGACCTGCGTAATTATTTTGATGAACAGTTTGAGTTTTGAACCATGTTTATTTCCTGAAATTTCAGGG	-22.6	488
CTGGATCCCAAATGAGAGGGTCCGAAGCATCTCAGTCACACGCCTCCACCGGACTGTCGGTGGCTGGGCA	-26.8	322
GAGACCAGGTACAGGAAACCTGTAGCTCAATCAGTGTCTCTTTAACTGCATAAGCAATAAGATCTTAATA	-25	39
TAAGATGTTTCATACTGGAGCGAAACTACAATCCTGAATGATGTCACAGTGCTTTTAACAATACCTCAAA	-24.1	25
CCTGGACGGGCGTGGGTTCTGGGTCAGCTTCTTTTACCTCAATTTTGTTTGCAATAAATGCTCTATAGCC	-26.7	16
GTCCCTAGCTGTGGGCCACCTCACCAAGTGCAGCCATGCCTTCCACCTGCTGTGCCTCCTGGCCATGTAC	-83.1	964
TCGTTTCCCAGATGGCCAGATTTGGAAACCAGACATTCTTCTCTATAACAGTGCTGATGAGCGCTTTGAC	-29.9	1714
TTGCTTGTGTACAAACCCAGATTGAAGCTAAAATAAACCAGACTCACTAAATCCTTTCCAATAATTGACT	-95.3	125
TGTCCAAAGACTTTGCGTAACCACGCCTGGTTCTGTACATGTGGAAAACTCACAGATGGGCAAGGCCTTT	-107.9	524
TCTATGTGAAGGGTATCAGTGAACAGGAAGGAAAAATCAAAACGTACTTTCTTCTGGGAAGAGTCCAACC	-25.4	385
AGTGAGAGTTTGGTGATACTGTCAAGCCCTATCCTTCTCTGCCTCTTAACTCCTTCACGAGGAATCTGGG	-23.2	1013
GAAGGTAGCGAGGACTTATTATCACAGTATCCTTTGAAAACCCATTCGGCATACTCACTCAGCAAATGTT	-21.7	652
CCGATGAAACTAGGAACCTGCCTCACTCCAAGCAAGGCAACAAAAATGACTTAGAGATGGGGATTAAGGC	-24.7	307
GGGGATTAAGGCAGCAAGGCCTGAAATAGCTGATAGAGCTACCTCAGAAGTGCCAGGGAGCCAAGCCAGT	-53.4	740
ATGGAAAAGGAGAAGGACCTCCTGCAAAACATCCTTCCTTGAAGCCTAGCACTGAAATGGAAGATCCTGC	-39.4	219
TAATTTTAGAACATGCACTCTGACAGAAAAGACATCTGAGAAACAAAACAAGCAAATTTGTTTTCCTTTT	-86.3	86
ACAAACATTCAGAAATCCCTAAATCTTGTGAGTTGTCGTATCATTTGTAGATATAATTATAAAATGGCAC	-21	28
GTCTAAAATAGTGATGTACATTAAATGCAAAGGGCAAATGGAACCATTGAAAAGTACTTTTTGCATCCAA	-24.2	1088
AGAAGGGAGTGCACCGTGGGGGCAGGAGGTGCTGCGGCCAATGGGCAGTGCTGGGAGATGAAACCAACAG	-31.3	96
GGTGCACCACTGCACCCCAGCAGAGACCTCCGCCTGGCACACAGGGAATGCTGGAGCAATACTTAAATAG	-31.3	862
CCTGACGATTGCGCACAGCCGGACATCATTTGTACTGAGAGACAAAAGGAAATCACTGAGGCTTTCTGAG	-22.7	17
TGGCCAGCGTCCTTGTCCTGCGGGGGCTCTGTGGACATCACTCGCCTTCAGAACACTGAGCCCTCCTACC	-28.7	266
CCCTGCGGGCTTCTCAAGGTGGTCACACTCCCGGTTTCCTAAGCTGCTCTTACTCCTGCTGGGTGGAGGG	-25	314
AGAAGTAAACACAAAGTAATTATAGTTCACCTTTATACACACGTTAACAGAAATCATCTGATCCCCTTTG	-21.2	124
CCAGTTACGGTGCATGTGAAGCAATGGTATGGGAAAATTGTTTGCAGAAGGATGAAAAGGCTTTATTGCC	-23.8	5240
CCTCTGCACTTTTCTATATTGTTCAGCTGACAAAGTAGTATTTTAGAAAAGTTCTAAAGTTATAAAAATG	-21.3	255
TTAAGGATGTCGAGGCGGGGAATGGTGAGGAAGAGTCGGGCATGGGTGCTGGAGAAGAAGGAGCGGCACA	-28.2	2176
TAGTTTACACTGAATTGCAATTACAGATGCATACAACTACTATACTAGAAAAAATTGTCATTTCTGATGT	-20.2	51
GGCCCTTCCTCATCTCCATGCTCTTTCACCCTGCCACCCTCTGCTGCACAGTAGTGTTGGGTGGAGGATG	-29.4	607
TCCAAAAGTTTTTAATACTGTATTATGTGAAATCTAACTAATTTATCTGTGAAATAATTCCATCACAGTC	-21.2	38
CCTTTGAGTGGCACCATTCACCTAAGTTAGCTTTTCTGGTCGCTATTGTTTTTATCCCCTTTGCTTTGTT	-22.7	692
GGGTCATTGTGGCATTCAGACACATAATTCAAAACTGCAAATGGTGGGACCGCACTAAAGAATTTTTAGT	-22.9	146
AAGTTCACCCTGTCCCTCGACGTCCCCACCAACATCATGAACCTCCTCTTCAACATCGCCAAGGCCAAGA	-25.3	62
GTGTGACGGCCAGAACTGGACTCAGATTTCAGCCCCATCCCCAATGAAGAGCTTGAGTTTGAAGATTATA	-26.5	924
TGGGACTTTTTTCTTAACTTTTTATTAGCTCTTCCTAAGGGAAATGTCACATATTATTATTTAATTGTAC	-23.2	119
TGCTTCAGAATCTGAACTTTGGAAGGGTCCACTACCAGAGACAGATGAAAAATCACAGGAAGAAGAATTT	-21.8	208
GTGCTCTGCGCTGTTTTCTACCCCAAGTATTACTGGGCAGGATCCGGCCTAGCTCATGGTTACTGCCAAC	-24.6	233
AATCCTGGACAGACGGCAGCCCCCCGAAGCATCCTCCCCCCAGCCATGGCTGCCTCCTCCTTAGGAGAAG	-32.8	281
GTTACCATTAGGAATTTAAAAGACATAAGACTAAATTACACCTTAGACCTGACATCTGGCTATCACACAG	-22.6	467
CTCTGTCCGGTTCCTTGGACTTGTGTGTCTCCTATCTTATCAAGAATAATTGTAGATTGTGGAAGAGTTG	-22.1	246
TGGTAGCAGAAGGATGTTCTAAACGACATCCTGACTCTTGCATGAGGAGATCAACAGTCTGGTTGAGCCC	-21.3	159
CCTGGATACCTCAAACCAGAAACAATGGTTATGATGTGGACCCCAGTCCCTAACACAGAGATGTCTTGGG	-24.8	607
GGTCCTCATTGATGAAGATGATGAGAAGTCATTGAGGGAGAAGACAGTGACGGACGTGTCCACTATTGAC	-23.4	193
CCGGTCTCAGACACCACAGAGCCCTCATCCCCAGAAGGGAAGGAAGAGAGCCTAGCTACAGAGCCAGCCC	-27.9	10137
ACCATCTCTCTCCACTTCCCCTTGTCCAGTTCCTCACACACTTCTAGATTCTTCCCAGCTCAGAGGCTTG	-26.6	649
GAGAAAATGCAAGACAATTTTTGATACTGGAACTATGCTTTGAAATACACCTTACACTCTTCATAGAGGC	-22	307
TCAACACCACCATCTGTGCCGGCTACTGCCCCACCATGACCCGCGTGCTGCAGGGGGTCCTGCCGGCCCT	-60.5	300
TCAACACCACCATCTGTGCCGGCTACTGCCCCACCATGACCCGCGTGCTGCAGGGGGTCCTGCCGGCCCT	-60.5	300
TTCCAAGCCCATCCCGACTCCCGGGGCCCTCAGACACCCCGATCCTCCCACAATAAAGGCTTCTCAATCC	-105.9	104
GCTGAAGCCAGCTGTGGATGGGGCAAACTTCATTGTTAACCACATGAGGGACCAGAACAATTACAATGAG	-28.4	368
GAGGAGAAGGGTTACTTGCTGCTCACACTATATACAGATGCAAGCAAGGGGCGTGGAGAGTGAGGGCTCC	-25.9	146
TCGGGTGTTGTTGTCATCACAGCGCCTCAGTTAGAGGATGTTCCTCTTGGTGACCTCATGTAATTAGCTC	-24.3	342
AAATGTGCCATATGGATATACAGTACATTCTAGTTGGAATCGTTTACTCTGCTAGAATTTAGGTGTGAGA	-20.3	501
GCCAGATGAAGGGAACAATCAGGACTATTCCTAGACACTAGCAAAATCTAGAAAATAAATAACAAGGCTG	-23.9	296
GAAATACATGAACCGTCGAGCAAGCCAGATGCTTCTCATGTTCCTACTGGCAATCTGCCTTCTGGCCATC	-71.3	789
GGTCCACATGCTGGACAATAATACTGGATCTGGTAATGAAACTGGAATCCTCAGTGAAGATGCCCTCTTG	-25.2	183
CCATGTTCTGTGGTGCTGTGCACGAGTTCCTTTGGCAGAAGTGTCCTATTTATTGATCGATTTAGAGGCA	-26.5	14
TCTTCCTCATGGCCCACTACAACCGGGTGCCGGCCCTGCCATTCCCTGGAGATCCACGCCCCTACCTGCC	-29.1	1177
GAATGGGCATCAGGAGAAAGCAACAAGAATCCAGTCCTTCACACTCACACTACTCTGTTCCTCTTCCCAG	-25.5	702
ATTCATGTACTACGTCGATGGCAGGGGCCCTGATGGTGGCTTTCGTCAAGTCAAAGAAGCTGTCATGCGT	-27.5	1807
TCTATTACTGATATAAAGAATTGTAATTTATTTCACATATTGATCTAGTATTAAGCAGCATGCTGAATTA	-23	441
TCACTTACAAATATGTAACCAAACGTAATTGTTAGTATATTTAATGTAAACTTGTTTTAACAACTCTTCT	-20	61
TATTCCATAAGATAATCAAGTGCTACATTAATGTTATAGTTAGATTAATCCAAGAACTAGTCACCCTACT	-20.5	389
GGTGTGTATTGCAGAAGCCTCGTCGCTTTCAAGTCACATCATATATGCGATCTGGCCTAACCATGGAGAT	-20.8	681
TCTTTGAACTGCCGGCATTAAAATATCTAGACATGGGAACAACACACATCACACTTACAACACTTAAGAA	-32	930
ATTGAATGTAGAATGGGATACGGACCAACAAAAAACAAATTATATTAATGAGAACATGGAACAGAATGAA	-92.2	362
GTTGTGTGTATATGTATTTAAGATGTACATTTAATAATATCAAAGAGAAGATGCCTGTTAATTTATAATG	-22.1	523
GACTTCAGCACAAATGATAGAAGAAAATTTGAACTGCCTTGGCCATTTAAGCACTATTATTCATGAGGCA	-22.8	1287
TGCATGCTGAAATCATGGAGCTACAGAAGAGCCCCTATGGAAGACGTCAGGGAGACTTGATGGAATCTCT	-26.4	561
CTCATCTGTGCAACCGCCCGTCCTCCTTTTCTAGTTTCTGATGTTTGTAACCAGACCCAGCTGTGTCATT	-25.6	20
TCTTCGGGGCCGTAGGACCCCTAACTCCACCCCCCTCCCTGGCAGCACCTCGAGCAGAAGGCCGAGTTCT	-30.6	1166
CTTAAATACTTCCTGCGAAGTTTTGACTGAGACGCTGCAACAATTCCCGAGCTGTTTCATCGTGGCACCT	-22.1	600
AATGAGACAACATAAATCACAAGCAACCAAGTCCAAAGGTTCTTTACACAGCCAATAGCTGGTGCTACAA	-54.2	73
GGTATTCTAAATCTAATCCCCAGAATTTTATTTCTTCAAGACTGTGATATAAATCTTTGCCAGTTAAAAA	-85	20
CTCTCAGCAGGTCCGATACCTGGAAATTAGCTTAGTACACAAGACTCCCAATTACTATTTTCTTCCTTCC	-22.9	96
ACCAGGAAGAGATGGAGAAAGTAAAACGTGAAAATGCTACAGTTATGGATAAGACCCGAGCTTTGATTGA	-90.6	316
CGCCATCACTAAAACAATTTTAGAATCACACCTGGACAATCTCGTGCTACCTACATACTGCCACTCCATT	-22.9	403
AGACTGCCAGACTGTCGTCCGAAACATACAGTCCTTTCACATGGACACACGGAACTTTTGTGACATTGGA	-23.8	397
TACAGCCTTTTACAGTTTTTTATATCCATTGACTTATTTGTGTCTTTGTCTTTAAAATCTGCCATTGCAA	-22.2	38
AACAGAGATATATGTAAAATTGCCAATACTATGAGAGCTTCTTTGTTCAAATGTATTTCCTCTTATTATA	-21.6	48
TGTGATGATCGAAGCTATAGCTACTACGTTGAGGTTTCTACCAACCAGCAACAGTGGACCATGGTTGCTG	-24.6	327
CCAGGCTCCAACTCACGCTCCCCCAACCGGCAGCACCAATAAAGGAGGCAGCGGGCCTGGTGTGACTTGG	-29.8	6489
GCAGCACAGCTTAGATGCCCTGGTTTGTCCCTCTTGTCTCCTGGGAAGAGCTTGCTCCCGCCCAGCTCTC	-27.5	186
GGGGCCTCTGGTTCAAACCTTCGCGTGGCATTTTCACATTATTTAAAAAAGACAAAAACAACCTTTTGGA	-24.5	2
AGGCTTGGAAGGGAACAGGGCAGATGAGGCCCTTCACCCACCATCTACGCCATATACCCATCACCATCCC	-27.4	379
AGACGTTGTGATGATGCGACTGAGGATTATGCAACGTGGTCCAACCGGAGCGGCCAGCATGACCAGCTGT	-26.1	145
CATAGGCATCATCACATTTTTTATAGACCTGGAATCGTTTAAAATACTTTAAGCATCATAATTACTTGGG	-21.4	323
GTGTTCTTGGGTATTGGGGACAGGACAGAGAGCTCATTCTATAACCACAGTTGTCTTTTAAAGGCCACCC	-27.4	134
CAATGATTCATTCATTAATGTTAAGGCTAATACATTTAAGATCTTGTTTAAACAATGTTTCTTCTGCAAC	-21.1	161
CAATAGGATGCAAAGATCAATGCAAAAATTGTTATATATGAACATATAACTGGAGTCGTCAAAAAGCAAA	-21.7	132
TGGAGACTCTTTCAGACGCTCGACGTCAACCGGGACGGCGGCCTGTGTGTCAACGACCTGGCGGTGGGGC	-27.4	724
TGGGAGGAGCTGTTTTCCATCGGACTCCGGACAGTGATCCAAGAGGCGCTGGCCCTTGACCGATGAGGGT	-23.6	254
CCATGTGCAGCTGAAAAGTGAAAATATTTTTATTTTGGTTTATTTGTAAAACTTGTCCACAGTCAGCCTG	-24.8	549
TATGGTACCATAAAGTGCTTTGACATAAATTTGAACCTAGAATTGGCAGTTCTAATAAAAGTTTTTCCAC	-22.5	402
CATGCCACGATTTTGTCTTTCTGTGGACTCAACATTCACTTCGATTAAAAATAGCAATTTGACCAAGTTG	-22.1	306
CCTCAACTCGGAGATTCCTGTATGGAGAGAATCAATTTCTATATTTGCAATAAATTTCTTATTTAAAGCT	-22.5	0
GTATGTAATATAGGCAATATAATGAAACACCGAGTTTTTTAAAGTGAAAGCATGCAAAATCGTAGCTTTT	-21.5	307
GAGCATCAGTCACACCCTGGGTCAGTACCTCAGCTGTCTCTCACATGACATCCTCATTATCCACACTGCA	-24.5	525
TAACTCTGGCCTCAATCATATTCCTCTGGGATTTCTAAACAGCAGTTAAGCTACAAAAAGCAAACAAAAC	-23.2	253
CAGAAATACTGCACTGAGTATATGCCCTCATTACTGGACTTCATTTTGATACTTGTCTATCCTTCATAGT	-22.1	123
AAAATAATAAAATACTTGATAGCTTTTTCTAAGTGACCAATGTACTAACTGAGAATAATGGTGTGTTGTC	-20.9	621
CAAGGGACACTGGTCTTTTGACAAAATAAACTTGTGTAAATTTTGATACTGTATTAAAACTATTTTTTTA	-23	72
GATAACTCCAAAGACTTTCTTACGGTATAATACATGTTGTTTAGGATTGTGTTTCTTAGTCACTGAAGAT	-23.9	367
AATGTTCTGTGATAAAATATAATTTCAACTATTTTGTACATTTAAATATGCCATGTTGTATATGTCTGTA	-20.7	187
AGTTAAGACATTTTAATCTTGACACAGTAGATCTTACTTTCAAAGTTATAAACTTGAAGTGATTGTAGTT	-23.6	5177
GTATAGCAGTAGTATCATAAGATATGCCATTTTCTCAGCTATCTGAAAATTTTTAACCAATTTTACACAC	-21.2	454
CCCCATCTCTACCCCCTTTTGTTAATGGTTGAGAGAAATGTGGACCAGTGATTCTCAGTTTGGTGCCCAG	-24.9	253
TCCTCAGAGAATATTCCACCAGGCTATGAAGTAGTATCTCTTCTGGAGGCCCTCAACGGGCCCCTCACCC	-24.1	2365
TTAATTTTCTTCCTAATATTCTTCACATTAAACTATGGACTCTAATTTTCTGGATAAAATATCCTGCCTT	-21.1	169
TCATTGGATTGGACCGCCAGGCAGCAGTACTCAACCCGCTTGGATCCCGTTCAGGTGTAAGGAAACTTCT	-27.6	1298
ATCTATCTGATCCTAACAGAGTATGTAGGAACAGAATAGTAAGTCTTTAGTGCCATAAGATCTTAACATC	-91.2	50
TGCTCTTGTTTATTGCTTTTACAATCATATTTATTAAACAGATAATGTCTCTAAAGTCTTTGCCTCAGGT	-20.9	227
TGGTGGACCTCACTCCAACCCACAGTGGATCTGCCATGCTGATGCTGCTCTCAGTGGTGTTTGTGGGGCT	-25.9	4225
ACCACTGGGGTCTGGGCTTAAGCTTGGGCGACTGCCTCGGGGCACGGCAGGGAGGGAGCTTCCGTGCATG	-34.5	906
GTTCTAGTTGTCAGCGAGACTCAACACAGATGACATTGAAATTCGTTTCTCTCCTCATCTATCACACTGG	-23.1	126
TTGACAGAAAGCTTTCAAAGAGGTCACTGTGGCCTGTCTTCTTGAGACACACGACACTTGTTCACCACGG	-31.5	321
CACAATGAAGAGGAAACATGATGAGATTCAAAGAAGTTTGCCTGTTAAACCTTCCAAAATGCTAAAGCCA	-21.5	2255
AGGAAACATGATGAGATTCAAAGAAGTTTGCCTGTTAAACCTTCCAAAATGCTAAAGCCATCAGGGACAC	-23.1	2226
ACTACATTGTGTCAGTGAATGGGCAGCCATGCAGGTGGTGGAGACACGCGGAGGTGGTGACGGAGCTGAA	-26.7	286
CTGCCCCCAGCCCTGTGCCCCAGTGAAGCCAGCTCCGCCCTCATCCTTGAAGCACCCAGGGTGGCCGTGA	-32	1568
CTGCCATGTAACTGGAGGATGTGCTATGAGTTTGCAAACAGCTGGACTGTCAGGCTGCTTTTTTTCCAGA	-23.9	146
CTCTGTGTTAGATTCCCTTTTCTTCAGCAGTTTCAGTTCATGTTTCTCTTCAGTAAATTTTGTTCAGTGT	-33.8	3
TGCTTTCTCCAAGGTTTAGGTTAATCAGTTCAGATATGAGCAAAGGTATTTCTAAAATGGCTCTTCTATG	-21.7	179
TGTGCTGTCTTAAACCGAAGAAAAGGTATTAGGGAATATTTTATAAAAAATAAACTTGCAATAAATTATG	-21.5	487
CCTCCAGAGACACACCGTTCCACTTACAGTATCTAGCTTCCTCGACTCCTTTGTTAAAATCGTGGAGTAT	-20.1	204
TAGGGTTCCAGGAGGATTTTGACCCACAGAAAAGGAGCCCATGGAACACAAGTTAAAGAGGTTTTGCTGG	-25.5	1668
TGCTCTGGACGTGGCCTTTCCAGCACTCACCACTCTGAATTAAACATCACAGGCCCCCATCTGCACATGT	-27.2	254
CTTTGATAACTAAGCAAATGGAATTATGGTTGACAGAGAGTTTATGATCCAGAAGACAACCACTTCTCTC	-23.5	1375
AATTATGGTTGACAGAGAGTTTATGATCCAGAAGACAACCACTTCTCTCCTTTTAGAAAGCAGCAGGATT	-23.9	1311
CTAGGTAGCTGCCAGTCCGTGATTTTAATTGCTGTCTTGAAGTTAACAAGTGTTATAATGAAATAATCTA	-20.4	625
AGGCCGGGGAGGCTCAAGTTCGCCACTTTACTCAGACCGATGCACAGTCTTCCCATTTTACACTTTTTTA	-23.1	290
AGTTTGAGCAAGACGGGATCCTGCGGACCTTGCAGCAGGAGGCCGTGGCCCGCCAGACCACCTTCCTGGG	-29.4	1555
GGTTTCTGGGTCAACTGAAAACCTACCATTTGCTTTTCTATTCATCTTTATAATGGACTTTCAGAAGTGC	-22.8	434
ATCGCTGCTCTTTCTCACAGTCTGCCTCTGATGAGGGCGAATTGCTATGACATTCCAAGCTCCAATAAAG	-25.5	472
CTGTTGAAATTGTATAGGACCAGTGTCTTATTAATATGATTAATATATTTAGAAGAGCCACGTGAAACCC	-27.5	499
ATTACAGATTGAGAAATGATGGAATAATAGACATAATTAATTCAATACACTACTGTTAAAATCATTTGCA	-21.5	3575
TTGTATCTAATCCTGGATTACAGTTTAATTAATTATTCTTAGTGCTTAAGGCTTCATAAAGTAATTTTTC	-20.1	27
CAGGCTTGAAGAAAGACAAAGAGCAGAAGCCCGAGAAAGGAAGGAGAAGGAAATTCAGTGGGAGACAAGG	-38.5	766
TACATAACGCCTGCATAAATATTCCATGGTTTCAGTTAAATTTCAGTTTTTAGCCTTTACACATGAGGTC	-21.6	233
CTTCTCTGTAGTAATACTAATTTTGTGCCTTTTGTCTGCTTTCTTAAGACCAGTTGTTCACACTTTGTAG	-24.9	2946
GTTTTTTCTGATATGGTCTTCCAATCAGTGTGTGTAACATACCTGTTGTTTATCAGCCATTGTAGGTGGC	-22.8	429
ATCTGGGGTCCCTAAGTCCCTCTCTTTAAAGAACTTCTGCGGGTCAGACTCTGAAGCCGAGTTGCTGTGG	-23.5	89
CCATGGCAGAGCTCGTTCCATTCACGAAGGCTTATCAGAATACAAAGTGACACTGATAGGCGGATCATCT	-22.8	628
TCAACCTAGTAGAGGACAATAGGCTAAAGGGAATAAGTACATGGATAACAAAACATAAAGTAGAATGTTT	-20.9	723
GGCACCGTGGTGGACACAGAAGAGTTCTTTCAGACCTTGGGAGACAACACGCATTTCATGATCTTGGAAA	-24	726
CGTCAACATTGGCGGCGACTTCGACGCGGCGGCCGGCGTGTTCCGCTGCCGTCTGCCCGGCGCCTACTTC	-5.5	585
TCTTTGCTTAGTGCCCACTGCAAAGTGAGCTCATGCTCTCACTCCTAGAAGGAGGGTGTGAGGCTGACAA	-26.1	330
ATGGCCAGATGACGGAAACAGGGTCTGACCAAGTGCCAGGAAGACCTGTGCTATAAACCACCCTGCCTGA	-27.9	69
TTCTTCTGATCGTAATCCACGAATGCATTCATTTTTTGGACATTGCTTACTTATCTTTTAAATGTTTCTT	-21.7	717
GTTGCTGACTGGGAATTTAAGAATGTGAACTTCTCACTAGAATTGGTATGGAAAAGCAAAATACTGTAAA	-24.1	482
CCTTGAATAATCCATGAAAGGAATAATTCAAATACAGATAAACAGAGTTGGCAGTATATTATAGTGATAA	-21.1	659
AGATAAGCCTGGTTTTATTTTCGTCAGTGAAAAGGCCTTACCGTATAACTGACTTTATGCTTGCCCTGCC	-22.9	316
TTTTGATCAGTATTCACTGCTGTCACCATAATTAATAGCCTTAAAATAGCTTGTGTTTGGCCCAAAGAGA	-22.6	558
TGCACATATCCAGGATATGTGTAACCAGCGATGGTGACTTGACCTTGCCAAGACCTGTGATTCCTTCAGG	-22.8	192
AAGTTTTCAATGAACTGTGTCACCTAAGTAAGCTACCCTGCTATTCGTTGTTTAAATATATGGTTCTCTA	-20.8	638
ATATATTTTGGAACTTTAGTTCCTCTGTGAGACGAAAGAGGAGAGCTATGTTTTGTGGCACATTGTCTGA	-22.3	598
TCAGTCCTCCCGCCTCGCTCTCTTGAGACTGAGGGGTCCGCAGAAGTCGCCACCCAAATAAAACCACATT	-28.7	285
ACTGGATGAGTCGGGAAGGTTTGGTAAAGAAGTCCAGATCATTCTCCTCCCCCCCTAGTAAGTAGATGAT	-23.6	129
GCCCAGACTTGACGTAACAGAAATGTGCCAATAGGTAATAGGTAATTTTTCTTTCTCTGACTTGTTTTGT	-22.2	1679
TGCGACATTGCTTTTACCAACACCTCCACATTTCCTATACATAAAAATAAATTATACTAGTGTAATACCC	-33.5	53
ATATGATTGTCATACATGATTGTAGGTGATAGAAGTCATACTGCCAAAACTCCTGTAAGTGTGAAGAATG	-28.6	1121
AACCTTGACAACAGGCGCATCCTCCCAGGCCACCAACCCAGCCATAGGCTCTTCTCTGTCCGCAGGGCTT	-28.4	449
ATTTTAATATTTTCATTTGGATTTATATAAATGAAACATATATATGTTTTGGAATGGCCAGAGTGAGGCA	-22.9	940
TGGGAAGATGTTTTTCAAACTCAGAGACAAGGACTTTGGTTTTTGTAAGACAAACGATGATATGAAGGCC	-25.4	365
CTGATCTCTTCCAGTACTGGTCGTGCGTTACCCAAAAGCACACAAAACTCGCCAAGCTCGCCTTCTGGCT	-22.8	168
GAGGCGTTGGTCCTGGAAGCTGACTCATCGGAGAGGGAAATACCAAATAAACATCCGAGGTTGCAAAAAA	-24.4	32
GGAGTGGAGGTGTTGGTCCTGGAAGCTGACTCATCGGAGAGGGAAATACCAAATAAACATCCGAGGTTGC	-24.7	2230
TGGCGGCTATCCTTCTCTCACATCGAAAAGGAAATTTTGAACAATCATGGAAAATCTAAAACGTGCTGTG	-21.3	696
GAACCTTATCTCTTGAGATATTTGCATAATTTATTTAATTTAAGCCTCATTCTCCTTTTGTTCATTTTGG	-22.1	26
TGGTGATATCCTGGAAGAAATTATCCGACAGATGAAAGTGTTCCACCCCAACATCCACATCGTGTCTAAC	-26.8	927
AAAGCCAAGAGCCATCTGGAGGTGCCGCTGGAGGAGAACGTGAACCGCCGCGTGCTGGAGGAGGGCAGCG	-31.2	681
TCCCGCTAGGAGTTCCTAGTAAAGTGGCGGGAGCCGCAGCTATGGAGCCGCAGGAGGAGAGAGAAACGCA	-34.6	1036
ACTGGCAAGATTAAAGCAACAGACTATACCTTTGAAGAAAAAATTGGAGTCCTATTTAGACTTAATGCCG	-66.4	306
TGATTCAGGGTGGTCCCTCTGCGCCCAAGACCCGGCTGCCTCCTCCTCTTCCTGGCTGCAGGGAGTGCTT	-31.9	414
ACACAGGTCCTCTGCCACGCTGCTCACCATGCCTGTGTGTTATCTCCCCATGAAAAGTCACCTAGGCCGA	-87.8	157
GGGAGTTAAGTGGTACTTTCACAATCCAAAGATTTTTAGTTAAAAATCATGTAGTCTAATATGCTGCAGT	-20.6	145
GCCCTTCCTTAAGCCTGTGGGTCTAAGAACATCCAGAGCATATTAGCACATCACTCCAAGCAACAACCTC	-27.5	777
ACACAGAGCCACGGAATCTCACAGGAGCCTGAGAACTCCTCCTCCTGGGACTCTCAGAGGATCCAGAACT	-85.8	568
GCTTTGTAAGCCACTTTTTAGTACTCTGACACATACATGTGGTTATCTTTTGCCCTGTTGTGATGGATAA	-22.2	838
AGGCCATCGACGACCTCATGCCTGCCCAGAAATGAAGCCCGGCCCACACCCGACACCAGCCCTGCTGCTT	-29.4	170
GTTTGTCAAAGAAACGATGTCAAATATACACTTCTTGATCTCCCTTCTGTTTGCGGGGATCTTACTATTT	-24.1	458
TTTTCAGACATGCCCAAACTTTGAGAATTCCTTCAACCATCTAATGCTATAAAGATTTTTGTTCTTCCTG	-21.9	129
CATTTGATGATCATAAATACAAGTGAATGACATTGGACTTTTAGTAACAAACTTAATTTTTAAAAAGGTG	-20.6	1677
ATTCTTCTAGAATTTATTTTTCATGAAATATTGATGTATTTTAATCTATGTTAAAATATCTTCAATGAGG	-21.5	1251
TATGTTTAATAGACCATACAGCAGAAAATTGGAGGCCGAAGCTGACAAAATTGGACTACTGCTTGCTGCA	-25.4	1371
AAATGCTTGGAAAGATACTACAAAGCCAATCTTTATAGAATTGGGCCAAGATAAATCTATGTTGTTTTGC	-21.6	514
GCCAGGAGTTTCCACTCGGTCCGACGCCCTCGGTGCCCCGCCGGGTGCATCACCAGGTCCTTTTACCGGA	-30.2	873
GGAAGCAGCACTCAGGCCCATGCCAGTGTTGACTCTAGGAGAGAAAGGGTTAAAGCAGTCCCAGCCTTAG	-101.8	600
TAATTACCCTCAGATTTCACCCATAAAAACGCACAATTGTATTATTTTACAGAGATGTGTCCAGCGCCCC	-21.8	728
AGGTCCGCTGAGGCAGTCTGTCCTTGAGACTAACAAAGTCATCTGCTGTTTGGGGAAATCTCTGGTGTTG	-27.6	637
GTGTTTATTTTTTAATGAATTTATGTTTACTTGATATGGAAAATTACGCTTTATAGGTGGAAAAGTAGCA	-19.9	719
CTCCATCGATGTTGTATTTGCAGTGGCTGAGGAATTCTTGTACGCAGTTTTCTTTGGCTTTACGAGCCGA	-24.5	20
AGTGGCTGAGGAATTCTTGTACGCAGTTTTCTTTGGCTTTACGAAGCCGATTAAAAGACCGTGTGAAATG	-22.6	1640
TCACAGAAGTGCCTGAGACGCGGAGACATGGCTGGTGTTAAATGGAGCTATTCAATAGCAGTGACGCGCT	-22.5	145
CAGGCACTCACTCTTATGAATTAATAAACATTTGGAGGTATATAAAGTAAAAAGTTAAAGTCTTTCCTGT	-22.4	695
GCCCTGTAAAATGAATTATTCTCATGCAGTGCTCTACTTGACTTTTATCTTTGAATTCACAACTAAAAAC	-22.1	70
GCATTCAAACAATCACCATTTCTGGAGATACACTACAGGGTCACCATAAACTCTGCTACCCTTAGGTTCC	-22.7	599
GAGACTGAGGATGATTTACTTTTTGTTTGAATTTACCTATGGCATTAGCATAGTAAGCAGATATTTCTAC	-20.6	278
GTTATTAACGCCACATTTTTTAAATAGACAAAAATATGAGATTAAAAATGTTTGAATTTTTACTTAACAA	-21.8	26
AAATGAACAGTTAAGGCTCTTAAAGATCCTTGACATGGCTAGCAACATAATGATTGTCACTCTACCTGGG	-22.7	3528
AGGGAGAGACTCCATCAGGAACAAGTGAGACAAATGGAGATAGCCAAACAAAATTGGCTGGCAGAGCAAC	-24.4	263
AACCTGAACACAATTTATATTGGACTTAATTATTATGTGTAATATGTTTATAATCCTTTAGATCTTATAA	-20.3	462
TCCAGCTCTCAGGTGTACAGAAATGCGGTTTACTTTGTAGGCCACGTTGGTTCAATAAATGATGCAGCGG	-25.2	33
ACATGAGAGGAGAGAAATACACGTCTGATAAGACTTCATGAAATAATAATTATAGCAAAGAACAGTTTGG	-21.3	96
AAACACCTGAAATGTAAACGTGACCCTCATGTTAAGATAGAAGGGAAGGACACTGATGACTGGCTGTGCG	-23.6	215
TGGTAGTGCTGCTCTCCAGATACTAGGCACTGCTCCGTATTTTTGAACATTTGATTTAACTAATAACTGT	-55.9	391
GTCTCACCAGTGGTTTTACATCTGCAGAGTTTTGAGGGCTGTGCTGACCTTTGAGAGGATTTGAAATTGC	-33.6	75
GGGATTTTAAAAATCATTGAATAACTAGTTAAATGAAATTTTAGCTACACACTGCCTCCCAAATATTAGT	-60.1	733
ATGGAACTGGAGCTGTATGGAGTTGACGACAAGTTCTACAGCAAGCTGGATCAAGAGGATGCGCTCCTGG	-24.8	927
TGCCACTACACCTTCTGGGGCTGGACTTGTTTCAGCAGCTTTGGTTGCACTGAATTTGGGGGAGCTGCAT	-25.3	51
GCTGCCTCTTTAACCAAGAATTTGTAAACACAACTCTAATAAATGTGAGTTTTAAAGGATTGTTATTTAC	-21.3	155
ATGGGGGTGGTGCTGACTCAGCCGCCTATTCCCCAAGGAGCTTCAGGGCAGTCCTTCTGGCACTGCTCCA	-28.1	266
GTAATTTCCCACCATTGAACCTTCCTGTTGGTGTGAGATGCCAAATCTGTGAAAACCAGACACAGGTGGC	-25.6	509
TGAATTTGCCACAGTCAAGTCAACGTTCCCACCCCACTGGCTTGGTTACAGGGCTCTCACATGGGGTAGG	-25.5	258
GGGTGAACCCAGGGGTCCAAACTCTGTTTCTCTTCAGTGCTCCATTTTTTTAATGAAAGAAAAAATAATA	-25.2	145
GTGGTGTTTTCAGTGTAGGTATCTTAATATCAGCTTATCGTGGTTTTTGGTTATGTATTATAATTTTAGT	-23.1	74
GCTGGGGCACTATGAGTAAAAGACCGCTTTTAAAATGGGGAAGGCACCATTAAGCCAAAATGAATCTGAA	-24.7	12
CAATTCCAAACATATAAGAGGCTCCCTCTTAACACGGCACTTAGATACGTGCTATTCCACCTTTCCTCAG	-85.3	0
CATTATTGTATTCGTTATGCTTAGTCTTCCATATAACCTTCTATGCATTTTAATAAAATGTTTGTTATAC	-21.4	277
GTTAGCAGAACTTGAGCAAAGACCTCAACCCAGCCATCCTTGTAGTAATTCCATCTTCAGGTGGAGGGAA	-25.3	538
GGGGAGATTGAATCAACGATTGGTCTCAAAGACAGTCCATTCTTTATATACATGTTTAGCATTTTTACCA	-21.8	323
GATGGGGGGACAACTCCTACCCTTCTTTCCCCACATGCCCCACTAAACCATCTGACAACATTAATGAATA	-28.8	1194
TCTCCACACGCCCCCTACACTGCCCGCCACCATTTTGCACACTGCCTGTTCACATGTCGCCCAGGCGGGA	-27.5	31
CCTCACCCCACTCCCTCAGCTTGGATCCTCACGTGGCCTGGAGCCAGCATTAAACTCCTGTATGTCCTTC	-30.1	750
TGAATGTCTCCTTACCCATGCCCACGGCACAGGATAGATGTGCTATAGGGCAAAGAACTTTGAGGGTCGA	-26.1	447
GTCAACTTGATATTCACGAGAAACATTTTTTTATTTGTTTAATATCTGGCTATCTCTGAGTCCTATAAAC	-21.2	139
GAGAGGCTCTTACTTCACTAAGAGCTGTCATATGTGAATGTTTTACAGTCTTTTCAAACTTAACATTTAA	-23.4	517
TTGGAAGCATGAAGGGAGGTGTAAGAAAGATAAGTAAGTCAGTGTACTTGCAACAGAGGCTTGGGATGAA	-24.2	519
TTTCACTCCTGGTCCATCAACTACACCGTGATTCTCAGCAGCTAAACACTAAAAATAAAAATGATTTTAG	-23	98
TGGGCTCAGTATTTGACGTGTCCAACGCTGATCGGCTGGGCTCGTCCGAAGTAGAACAGGTGCAGCTGGT	-23.9	686
AGAGCAGGAGATGGTGCGCATGGTACGGGCGGCCACGCTCATCCAGGCCCTATGGAAGGGCTATCTGGTG	-26	253
GAAGTGCGAAGCCTGTTTGAGCAAGTGGATCGGGAACAGCAAGGGCGTCTAGATGTGCTGGTCAACAATG	-25.7	973
GGACAGTGATTCCTGCCAAAAGTGTGATCAGCCTTTCTTCTGGAACTTCAAGCAAATGTGGGACAGTAAG	-26.8	541
TGTAAATGGTCTATTAGCCTTCATTTATACTGCCTAACAATTATTTGAAGGAATAAATTGATGTCAATGG	-22	234
ACCTGGAGGACCAGGAGCCACGGAGCCTCACCGAGTGCCTGCGCCGCCACAAGTACCGCGTGGAAAAGGC	-29.9	503
AGTGCACATCAAACTGCCCCTGCTAAGCAAAGATAGCCGCTTCCCAAAGATCCTGGAGAACCTAAGACTC	-56.6	315
ATCGCCAGCTGATGACTCAAGATTCCCAGGAGTTCTGCTCATTCTAATGATGGCCCATTCTACTTGCTCT	-95	97
CCTCTTTTTTTATTATGCCTTGGAATGGTTCACTTAAATGACATTTTAAATAAGTTTATGTATACATCTG	-22.4	542
CCCGGCTGAGGTTTGGAAAGGAATCAAGAAACGGCAGAGAGACTGAGGGTTGCAGACACATATATTTTTG	-25.8	281
ACTCAAGATCCGTTCCCAGAAATTAATCGAAAGTCACAAGAAGCACCGTCGCTCTCGGAGGTCCTAGACT	-23.3	282
ACTGGCACATGAAGAAGCACACTGCGGAGGTGCAGTACAACTTCACGTGCGATCGCTGCGGGAAGCGCTT	-23.5	316
CCCGCTTGGCGGGCCGGGCAACACGTCAACATTCTTTTCTGTTCTTGGCATTAATTATTGCTGTCTTTTT	-22.6	36
GTTTATTGAGTTTGTAGGTAAAATGTATTTTTCTACATTATTGCTTATTGCTTAGTAAAATTTATTTCAT	-21.9	904
CGACAGACATAAATCTCTACTCTGAGAGTTTTTATACACTTGGAAAAATATAAAATTGTAGATCCTGCCT	-21.3	132
TCCATTACTGCTGCGTCCCTGTTTTACAATGCAAAATTTAAGTACGGTCGTTGCCCATGGTGATTAAAGT	-24.7	788
CCTTCAAATGTCAGGAGTGTGGGAAAGGATTTTGTCAGTCTAGAACTCTAGCAGTTCACAAAACTTTACA	-25.6	712
GTGCACTCATCCCTTATAAGCACATTACTTTTACACTTAATGGTAGGCCACAATCTTCATCAATCTGTTC	-22	206
GAAGTAATGCCAGAGCAACCTATAACCTGACATACCATGCAGAACATTGTAAAATATTCTTTAACAGAAC	-21	488
CTATAAATCTTTTGTATAATGTATTTTATACAAATGTAACTGTAGAACATTGTTAGCATGTGTATCTGTA	-20.6	162
ATGTAAAAGTAACAGCAGAATCATTGCATTTGGTTTACTTAAAATTTTGGAGTTAGCAAGTAAACAAAAA	-22.4	693
GAAACACTATGTTAGTATCTAACACACTCCTGGATACAGAACACAAGTCTTGGCACATATGTGATGGAAA	-22.9	206
TCCCACCCTCATCCCTGACCGACTCCACTTAACCCCCAAACCCAGCCCCCCTTCCAGGGGTCCAGGGCCA	-28.4	249
ATGCAGCTGACCCCCAGGATAAGCACTGGCTGGCTGAGCAGCATCACATGCGGGCAACAGGGGGCAAGAT	-26.8	613
CCTCAAAATGTAAATTCAAGAAACAAGGTAGTTACGTTAGCCTGCATTAAAATAAAAATATCTGTGTGAC	-20.4	420
GATGAAGAAGGATGAATATCATCTTTAGTACCTTTTTGTCTCTGCTGAAACTTTTTAAATGAGACTGTGT	-22.7	731
TAGGACCAAGTCACCCGTCGTGCTGGGAGTGTGGATTCTAGCAAAAGAGCTGGAAAAAAGTCAGACTCTC	-24.4	247
TGTGTCTCATTGATTCATTCAGCCTGTGTGTCCTAAAGCCTCCCTTCTCCCATACTGGGTGATGCTGGGG	-26.4	1077
CAGGCTCTGCCCACAGGAGGCATGCACAATCTGGTAGGAGAAACGCACAAGTACAGATAGCTTGCTCTCT	-30.3	1150
TGAGTGTGTCTCATTGATTCATTCAGCCTGTGTGTCCTAAAGCCTCCCTTCTCCCATACTGGGTGATGCT	-28.1	1288
TGATAATTCGCTTCTAAATTTAAATCCTTATTTATATATGAAGCATAGCTATGTCAATGTCCAGGGAAGC	-20.8	256
AATGCTGCCAACGACGCTGACCTTTGTAACCTCCCTAAAAAAACTACCGATTATGCCATGCTGGTCACCA	-22.9	501
TATCCCCTCCCCTCTGCTTGAGCCTTGAGCCTTGACTGGGAGCTGAAAGGAGTTGCAGCTGTTGGCATGA	-30.4	125
ACTGAATTAACCTTCATAAATACATTTTGAGAGATTTCAGTGTGAGTAATTTTCTGGACATAATATTATT	-21.9	303
GTTCATTTGACCAAACGGTGAGAGTACTGATCGTTACAAAGCTCAATAAAATTTGACTTCAAGACTTTGG	-20.6	1329
GATAGACTGCTTTCAGAAAACCCTTATCAACAAGTGTACAATACTTATCTAAAACTATACATTTAGAATG	-80	200
ATGTTTCAACTTTGGATTATGAAACCCCATTTATGATTTTTTAAATACACTTGAAATAAAAATGATTAAA	-85.4	1235
GGAGAGGCTTGTATTACATGACAGGTGTAATTAGTCTGCTGAGCCAGCTTTACCCAATGAAGGGCATATG	-33.1	1378
CAGAACGCCTGTGTTTACATTGTTTTTATGGAACTAGCAGAATAAAACATCTATTTTAAAAATGAAAGCC	-47.9	482
CTGATACGATTCAGTGATTACGTGGAAGTAGCAAAAGCGCAGGACTATGACAGGAGGGCAGACAAACCCT	-23.2	725
CCCATAAGCCTACAATAGATGAGTATTTTTACTATTTGTATTAAGTGTCATAATAGCATCAATGTGCACA	-21.3	460
AGTTGTGTACCTCCGAGAACCTAGCCCCATGGCTGGCACGTGGCCGGAGAACTATCCTATCCCTGAACCA	-33.9	1251
CAGCCAGCCAGAGAGGACAGTGGAGCCCAGACACGTCTCCTTGGGATTCACTAGCCCCCAGCCCGCCAAA	-26.8	294
CCAGGTTCTCATCAGCAGCAACGAGGTCAAGGAGATCAAAGGCTACAAGGACATCTTCGTCACTGTGGCT	-25.6	209
GCAGAACCTTCACTTGCAAGCATGGGTGTTTTCATCATCGGCTGTCTTGAATCCTTTCTACAAGGAGTGG	-27.4	337
CCCTTTCCACAGATAACTTCTGTTAACAACTTGATATCTATTGTACAAGATGTGTTACTGGCATTTCCAT	-22.2	28
TAATCCTTAAATGGCAAACGGTCAGGCCACGTGACTAAAAACTGTCCTGTTGTCGAAGCTTCTCCCCTGG	-22.8	77
TGGTGGTTGAACCTGGAGGTGCCAAAAAAGCCAGCTGCGGGCCCAGGACAGCTGCCGTGAGACTCCCGAT	-40.5	507
CAGGGTTTAAATTTTTAAGTATAATTAGTTCTGAATTAAAATATGCACATGGAACTTGTCTGGCAGACTG	-22	295
GAGGACTAGAGATATAGTATATCAGAGATAATATATAGTATACAGGTTGATCTAAATATTCTGGTTTGGA	-19.8	669
ATCATCTCCTCTACCGGGTTAACAAGTATGTGAACCTGGTCATGTACTTTCTCTTCCGCCTGGCCCCTCA	-27.3	522
CATGTATTTAAAACGCCATCTCATATCATGGACTCCGAAGTAGCCTGTTGCCTCCAAATTTGCCACTTGA	-25.5	791
CCTGAAGGATCATGGATTAGAACTGTTCAGAATAAACTGCAGAAGATCATGGGGTTTGCTTTGCCCCTGT	-24.4	264
TTAGTCTCCCCACTATGGTGAGGACGAGGGTGGGGCATTGAGAGTGTTGATTTGGGAAAGTATCAGGAGT	-27.4	144
CTGTTACAGGGATCATGTAAACTTGCTGTTTTTGTTTTTTCTGCCGGGTGTTGTATGTGTGGTGACTTGC	-88.3	92
TCTGATGTCTGAATCTGAATGGAGGAATCTTGGCGTTCAGCAGAGTCAGGGATGGGTCCATTATATGATC	-101.8	801
GCTCTTTCTCATGATTATTTTCTCTATTCCTATTAAAATGAATAATTGATATGTTAATTAAGTAAAGCAA	-19.8	198
GCCGAAGAGTCAAAGAGCTAAAAAATTAAGTCTAGAACATTCTATGAGGATAGTATAAATAAAAAGAAAT	-22.2	163
AGTGAATTTGGATGGAGGACTGTCTAGTAACTTCTTAACAAAACATTGATTAGAAGTCTTTCTTGGCGGG	-24.6	317
GACTGTAAAGAAATTTTGAAACTAATGAAGAAAAAATTGCCAAAATTGCCAAAGCTTTTAGGACTCTTAA	-23.6	407
ATGCCAAATTATATTGCAGACTGAACAGACGTTTATCTATCCCATTTGGCGACGAGGACTCGTGGCTGGA	-23.4	130
CTTCCTTGCTCTGCGCTGGGATCATACTCCCAAATCACATTACTAAATGCCAACAATTATCTCTGAATTC	-22.2	203
GCCACAAGCAAGAGAGAATTTAACACTGTTTCAAACCCGGGGGAGTTGGCTGTGTTAAAGAAAGACCATT	-24.2	106
GGCGGGGGCACCAACGCACTCCGGCGGGCAAGCGGTCTCCCGCACCACCTGCTGCAAGGCTCGGGAAGGA	-27.1	711
ACAATTCCCCATGAAAATTGCTCCAAAGTTGATAACAATATAGTCGGTGCTTCTAGTTATATGCAAGTAC	-21.1	570
ACGTGGTTTTGTCTGCTGCGCCCGCTCTTCGCGCTCTCGTTTCATTTTCTGCAGCGCGCCACGAGGATGG	-24.9	528
ATAAAAGTTCTTCCAGTCAGTTTTTCTCTTAAGTGCCTGTTTGAGTTTACTGAAACAGTTTACTTTTGTT	-59.8	261
CGCGTGCCCACTGTGCGAAAAGGCCTTCAAGGGCCGCTCGGGCCTGGTGCAACACCAGCGCGCGCACACC	-32.2	204
CGAGAGTCGACGCGTCGCCCAAGCGAACCCTGCGTCGAGGAGGGGCCTTTGTCCCGGAAAACCCACCAAC	-19.2	289
GCACCTGAGATCTCTGAGCAGTTTTCTGAATTTTCCTATTTCCTGTTGAAGACATAGGAACACGTGGCAC	-23.5	928
GTTATATACTTTCAGACTGTCTATCTCTTGTTTAGATTCAGCATGGCACCGTACGTTGAATGGACTGTTA	-20.7	355
[truncated: 41,713 more rows]

## Sheet: 11.HEEBO_Final_050510.unix.upda
Sequence_ID	LocusLink_ID	Probe_Sequence	Description	Oligo_Position HG17 v12	Symbol v12	Synonyms v12	description/name v12
hSQ025392	60	GATTGCACATTGTTGTTTTTTTAATAGTCATTCCAAATATGAGATGCATTGTTACAGGAAGTCCCTTGCC	PC Details: [Gridding Aid/Corner Marker]	chr7_-_5340026_5343473	ACTB	-	actin, beta
hSQ025392	60	GATTGCACATTGTTGTTTTTTTAATAGTCATTCCAAATATGAGATGCATTGTTACAGGAAGTCCCTTGCC	PC Details: [Gridding Aid/Corner Marker]	chr7_-_5340026_5343473	ACTB	-	actin, beta
hSQ025392	60	GATTGCACATTGTTGTTTTTTTAATAGTCATTCCAAATATGAGATGCATTGTTACAGGAAGTCCCTTGCC	PC Details: [Gridding Aid/Corner Marker]	chr7_-_5340026_5343473	ACTB	-	actin, beta
hSQ025392	60	GATTGCACATTGTTGTTTTTTTAATAGTCATTCCAAATATGAGATGCATTGTTACAGGAAGTCCCTTGCC	PC Details: [Gridding Aid/Corner Marker]	chr7_-_5340026_5343473	ACTB	-	actin, beta
hSQ025392	60	GATTGCACATTGTTGTTTTTTTAATAGTCATTCCAAATATGAGATGCATTGTTACAGGAAGTCCCTTGCC	PC Details: [Gridding Aid/Corner Marker]	chr7_-_5340026_5343473	ACTB	-	actin, beta
hSQ025392	60	GATTGCACATTGTTGTTTTTTTAATAGTCATTCCAAATATGAGATGCATTGTTACAGGAAGTCCCTTGCC	PC Details: [Gridding Aid/Corner Marker]	chr7_-_5340026_5343473	ACTB	-	actin, beta
hSQ025392	60	GATTGCACATTGTTGTTTTTTTAATAGTCATTCCAAATATGAGATGCATTGTTACAGGAAGTCCCTTGCC	PC Details: [Gridding Aid/Corner Marker]	chr7_-_5340026_5343473	ACTB	-	actin, beta
hSQ025392	60	GATTGCACATTGTTGTTTTTTTAATAGTCATTCCAAATATGAGATGCATTGTTACAGGAAGTCCCTTGCC	PC Details: [Gridding Aid/Corner Marker]	chr7_-_5340026_5343473	ACTB	-	actin, beta
hSQ025392	60	GATTGCACATTGTTGTTTTTTTAATAGTCATTCCAAATATGAGATGCATTGTTACAGGAAGTCCCTTGCC	PC Details: [Gridding Aid/Corner Marker]	chr7_-_5340026_5343473	ACTB	-	actin, beta
hSQ025392	60	GATTGCACATTGTTGTTTTTTTAATAGTCATTCCAAATATGAGATGCATTGTTACAGGAAGTCCCTTGCC	PC Details: [Gridding Aid/Corner Marker]	chr7_-_5340026_5343473	ACTB	-	actin, beta
hSQ025392	60	GATTGCACATTGTTGTTTTTTTAATAGTCATTCCAAATATGAGATGCATTGTTACAGGAAGTCCCTTGCC	PC Details: [Gridding Aid/Corner Marker]	chr7_-_5340026_5343473	ACTB	-	actin, beta
hSQ025392	60	GATTGCACATTGTTGTTTTTTTAATAGTCATTCCAAATATGAGATGCATTGTTACAGGAAGTCCCTTGCC	PC Details: [Gridding Aid/Corner Marker]	chr7_-_5340026_5343473	ACTB	-	actin, beta
hSQ025392	60	GATTGCACATTGTTGTTTTTTTAATAGTCATTCCAAATATGAGATGCATTGTTACAGGAAGTCCCTTGCC	PC Details: [Gridding Aid/Corner Marker]	chr7_-_5340026_5343473	ACTB	-	actin, beta
hSQ025392	60	GATTGCACATTGTTGTTTTTTTAATAGTCATTCCAAATATGAGATGCATTGTTACAGGAAGTCCCTTGCC	PC Details: [Gridding Aid/Corner Marker]	chr7_-_5340026_5343473	ACTB	-	actin, beta
hSQ025392	60	GATTGCACATTGTTGTTTTTTTAATAGTCATTCCAAATATGAGATGCATTGTTACAGGAAGTCCCTTGCC	PC Details: [Gridding Aid/Corner Marker]	chr7_-_5340026_5343473	ACTB	-	actin, beta
hSQ025392	60	GATTGCACATTGTTGTTTTTTTAATAGTCATTCCAAATATGAGATGCATTGTTACAGGAAGTCCCTTGCC	PC Details: [Gridding Aid/Corner Marker]	chr7_-_5340026_5343473	ACTB	-	actin, beta
hSQ025392	60	GATTGCACATTGTTGTTTTTTTAATAGTCATTCCAAATATGAGATGCATTGTTACAGGAAGTCCCTTGCC	PC Details: [Gridding Aid/Corner Marker]	chr7_-_5340026_5343473	ACTB	-	actin, beta
hSQ025392	60	GATTGCACATTGTTGTTTTTTTAATAGTCATTCCAAATATGAGATGCATTGTTACAGGAAGTCCCTTGCC	PC Details: [Gridding Aid/Corner Marker]	chr7_-_5340026_5343473	ACTB	-	actin, beta
hSQ025392	60	GATTGCACATTGTTGTTTTTTTAATAGTCATTCCAAATATGAGATGCATTGTTACAGGAAGTCCCTTGCC	PC Details: [Gridding Aid/Corner Marker]	chr7_-_5340026_5343473	ACTB	-	actin, beta
hSQ025392	60	GATTGCACATTGTTGTTTTTTTAATAGTCATTCCAAATATGAGATGCATTGTTACAGGAAGTCCCTTGCC	PC Details: [Gridding Aid/Corner Marker]	chr7_-_5340026_5343473	ACTB	-	actin, beta
hSQ025392	60	GATTGCACATTGTTGTTTTTTTAATAGTCATTCCAAATATGAGATGCATTGTTACAGGAAGTCCCTTGCC	PC Details: [Gridding Aid/Corner Marker]	chr7_-_5340026_5343473	ACTB	-	actin, beta
hSQ025392	60	GATTGCACATTGTTGTTTTTTTAATAGTCATTCCAAATATGAGATGCATTGTTACAGGAAGTCCCTTGCC	PC Details: [Gridding Aid/Corner Marker]	chr7_-_5340026_5343473	ACTB	-	actin, beta
hSQ025392	60	GATTGCACATTGTTGTTTTTTTAATAGTCATTCCAAATATGAGATGCATTGTTACAGGAAGTCCCTTGCC	PC Details: [Gridding Aid/Corner Marker]	chr7_-_5340026_5343473	ACTB	-	actin, beta
hSQ025392	60	GATTGCACATTGTTGTTTTTTTAATAGTCATTCCAAATATGAGATGCATTGTTACAGGAAGTCCCTTGCC	PC Details: [Gridding Aid/Corner Marker]	chr7_-_5340026_5343473	ACTB	-	actin, beta
hSQ025392	60	GATTGCACATTGTTGTTTTTTTAATAGTCATTCCAAATATGAGATGCATTGTTACAGGAAGTCCCTTGCC	PC Details: [Gridding Aid/Corner Marker]	chr7_-_5340026_5343473	ACTB	-	actin, beta
hSQ025392	60	GATTGCACATTGTTGTTTTTTTAATAGTCATTCCAAATATGAGATGCATTGTTACAGGAAGTCCCTTGCC	PC Details: [Gridding Aid/Corner Marker]	chr7_-_5340026_5343473	ACTB	-	actin, beta
hSQ025392	60	GATTGCACATTGTTGTTTTTTTAATAGTCATTCCAAATATGAGATGCATTGTTACAGGAAGTCCCTTGCC	PC Details: [Gridding Aid/Corner Marker]	chr7_-_5340026_5343473	ACTB	-	actin, beta
hSQ025392	60	GATTGCACATTGTTGTTTTTTTAATAGTCATTCCAAATATGAGATGCATTGTTACAGGAAGTCCCTTGCC	PC Details: [Gridding Aid/Corner Marker]	chr7_-_5340026_5343473	ACTB	-	actin, beta
hSQ025392	60	GATTGCACATTGTTGTTTTTTTAATAGTCATTCCAAATATGAGATGCATTGTTACAGGAAGTCCCTTGCC	PC Details: [Gridding Aid/Corner Marker]	chr7_-_5340026_5343473	ACTB	-	actin, beta
hSQ025392	60	GATTGCACATTGTTGTTTTTTTAATAGTCATTCCAAATATGAGATGCATTGTTACAGGAAGTCCCTTGCC	PC Details: [Gridding Aid/Corner Marker]	chr7_-_5340026_5343473	ACTB	-	actin, beta
hSQ025392	60	GATTGCACATTGTTGTTTTTTTAATAGTCATTCCAAATATGAGATGCATTGTTACAGGAAGTCCCTTGCC	PC Details: [Gridding Aid/Corner Marker]	chr7_-_5340026_5343473	ACTB	-	actin, beta
hSQ025392	60	GATTGCACATTGTTGTTTTTTTAATAGTCATTCCAAATATGAGATGCATTGTTACAGGAAGTCCCTTGCC	PC Details: [Gridding Aid/Corner Marker]	chr7_-_5340026_5343473	ACTB	-	actin, beta
hSQ025392	60	GATTGCACATTGTTGTTTTTTTAATAGTCATTCCAAATATGAGATGCATTGTTACAGGAAGTCCCTTGCC	PC Details: [Gridding Aid/Corner Marker]	chr7_-_5340026_5343473	ACTB	-	actin, beta
hSQ025392	60	GATTGCACATTGTTGTTTTTTTAATAGTCATTCCAAATATGAGATGCATTGTTACAGGAAGTCCCTTGCC	PC Details: [Gridding Aid/Corner Marker]	chr7_-_5340026_5343473	ACTB	-	actin, beta
hSQ025392	60	GATTGCACATTGTTGTTTTTTTAATAGTCATTCCAAATATGAGATGCATTGTTACAGGAAGTCCCTTGCC	PC Details: [Gridding Aid/Corner Marker]	chr7_-_5340026_5343473	ACTB	-	actin, beta
hSQ025392	60	GATTGCACATTGTTGTTTTTTTAATAGTCATTCCAAATATGAGATGCATTGTTACAGGAAGTCCCTTGCC	PC Details: [Gridding Aid/Corner Marker]	chr7_-_5340026_5343473	ACTB	-	actin, beta
hSQ025392	60	GATTGCACATTGTTGTTTTTTTAATAGTCATTCCAAATATGAGATGCATTGTTACAGGAAGTCCCTTGCC	PC Details: [Gridding Aid/Corner Marker]	chr7_-_5340026_5343473	ACTB	-	actin, beta
hSQ025392	60	GATTGCACATTGTTGTTTTTTTAATAGTCATTCCAAATATGAGATGCATTGTTACAGGAAGTCCCTTGCC	PC Details: [Gridding Aid/Corner Marker]	chr7_-_5340026_5343473	ACTB	-	actin, beta
hSQ025392	60	GATTGCACATTGTTGTTTTTTTAATAGTCATTCCAAATATGAGATGCATTGTTACAGGAAGTCCCTTGCC	PC Details: [Gridding Aid/Corner Marker]	chr7_-_5340026_5343473	ACTB	-	actin, beta
hSQ025392	60	GATTGCACATTGTTGTTTTTTTAATAGTCATTCCAAATATGAGATGCATTGTTACAGGAAGTCCCTTGCC	PC Details: [Gridding Aid/Corner Marker]	chr7_-_5340026_5343473	ACTB	-	actin, beta
hSQ025392	60	GATTGCACATTGTTGTTTTTTTAATAGTCATTCCAAATATGAGATGCATTGTTACAGGAAGTCCCTTGCC	PC Details: [Gridding Aid/Corner Marker]	chr7_-_5340026_5343473	ACTB	-	actin, beta
hSQ025392	60	GATTGCACATTGTTGTTTTTTTAATAGTCATTCCAAATATGAGATGCATTGTTACAGGAAGTCCCTTGCC	PC Details: [Gridding Aid/Corner Marker]	chr7_-_5340026_5343473	ACTB	-	actin, beta
hSQ025392	60	GATTGCACATTGTTGTTTTTTTAATAGTCATTCCAAATATGAGATGCATTGTTACAGGAAGTCCCTTGCC	PC Details: [Gridding Aid/Corner Marker]	chr7_-_5340026_5343473	ACTB	-	actin, beta
hSQ025392	60	GATTGCACATTGTTGTTTTTTTAATAGTCATTCCAAATATGAGATGCATTGTTACAGGAAGTCCCTTGCC	PC Details: [Gridding Aid/Corner Marker]	chr7_-_5340026_5343473	ACTB	-	actin, beta
hSQ025392	60	GATTGCACATTGTTGTTTTTTTAATAGTCATTCCAAATATGAGATGCATTGTTACAGGAAGTCCCTTGCC	PC Details: [Gridding Aid/Corner Marker]	chr7_-_5340026_5343473	ACTB	-	actin, beta
hSQ025392	60	GATTGCACATTGTTGTTTTTTTAATAGTCATTCCAAATATGAGATGCATTGTTACAGGAAGTCCCTTGCC	PC Details: [Gridding Aid/Corner Marker]	chr7_-_5340026_5343473	ACTB	-	actin, beta
hSQ025392	60	GATTGCACATTGTTGTTTTTTTAATAGTCATTCCAAATATGAGATGCATTGTTACAGGAAGTCCCTTGCC	PC Details: [Gridding Aid/Corner Marker]	chr7_-_5340026_5343473	ACTB	-	actin, beta
hSQ025392	60	GATTGCACATTGTTGTTTTTTTAATAGTCATTCCAAATATGAGATGCATTGTTACAGGAAGTCCCTTGCC	PC Details: [Gridding Aid/Corner Marker]	chr7_-_5340026_5343473	ACTB	-	actin, beta
hSQ025392	60	GATTGCACATTGTTGTTTTTTTAATAGTCATTCCAAATATGAGATGCATTGTTACAGGAAGTCCCTTGCC	PC Details: [Gridding Aid/Corner Marker]	chr7_-_5340026_5343473	ACTB	-	actin, beta
hSQ025392	60	GATTGCACATTGTTGTTTTTTTAATAGTCATTCCAAATATGAGATGCATTGTTACAGGAAGTCCCTTGCC	PC Details: [Gridding Aid/Corner Marker]	chr7_-_5340026_5343473	ACTB	-	actin, beta
hSQ025392	60	GATTGCACATTGTTGTTTTTTTAATAGTCATTCCAAATATGAGATGCATTGTTACAGGAAGTCCCTTGCC	PC Details: [Gridding Aid/Corner Marker]	chr7_-_5340026_5343473	ACTB	-	actin, beta
hSQ025392	60	GATTGCACATTGTTGTTTTTTTAATAGTCATTCCAAATATGAGATGCATTGTTACAGGAAGTCCCTTGCC	PC Details: [Gridding Aid/Corner Marker]	chr7_-_5340026_5343473	ACTB	-	actin, beta
hSQ025392	60	GATTGCACATTGTTGTTTTTTTAATAGTCATTCCAAATATGAGATGCATTGTTACAGGAAGTCCCTTGCC	PC Details: [Gridding Aid/Corner Marker]	chr7_-_5340026_5343473	ACTB	-	actin, beta
hSQ025392	60	GATTGCACATTGTTGTTTTTTTAATAGTCATTCCAAATATGAGATGCATTGTTACAGGAAGTCCCTTGCC	PC Details: [Gridding Aid/Corner Marker]	chr7_-_5340026_5343473	ACTB	-	actin, beta
hSQ025392	60	GATTGCACATTGTTGTTTTTTTAATAGTCATTCCAAATATGAGATGCATTGTTACAGGAAGTCCCTTGCC	PC Details: [Gridding Aid/Corner Marker]	chr7_-_5340026_5343473	ACTB	-	actin, beta
hSQ025392	60	GATTGCACATTGTTGTTTTTTTAATAGTCATTCCAAATATGAGATGCATTGTTACAGGAAGTCCCTTGCC	PC Details: [Gridding Aid/Corner Marker]	chr7_-_5340026_5343473	ACTB	-	actin, beta
hSQ025392	60	GATTGCACATTGTTGTTTTTTTAATAGTCATTCCAAATATGAGATGCATTGTTACAGGAAGTCCCTTGCC	PC Details: [Gridding Aid/Corner Marker]	chr7_-_5340026_5343473	ACTB	-	actin, beta
hSQ025392	60	GATTGCACATTGTTGTTTTTTTAATAGTCATTCCAAATATGAGATGCATTGTTACAGGAAGTCCCTTGCC	PC Details: [Gridding Aid/Corner Marker]	chr7_-_5340026_5343473	ACTB	-	actin, beta
hSQ025392	60	GATTGCACATTGTTGTTTTTTTAATAGTCATTCCAAATATGAGATGCATTGTTACAGGAAGTCCCTTGCC	PC Details: [Gridding Aid/Corner Marker]	chr7_-_5340026_5343473	ACTB	-	actin, beta
hSQ025392	60	GATTGCACATTGTTGTTTTTTTAATAGTCATTCCAAATATGAGATGCATTGTTACAGGAAGTCCCTTGCC	PC Details: [Gridding Aid/Corner Marker]	chr7_-_5340026_5343473	ACTB	-	actin, beta
hSQ025392	60	GATTGCACATTGTTGTTTTTTTAATAGTCATTCCAAATATGAGATGCATTGTTACAGGAAGTCCCTTGCC	PC Details: [Gridding Aid/Corner Marker]	chr7_-_5340026_5343473	ACTB	-	actin, beta
hSQ025392	60	GATTGCACATTGTTGTTTTTTTAATAGTCATTCCAAATATGAGATGCATTGTTACAGGAAGTCCCTTGCC	PC Details: [Gridding Aid/Corner Marker]	chr7_-_5340026_5343473	ACTB	-	actin, beta
hSQ025392	60	GATTGCACATTGTTGTTTTTTTAATAGTCATTCCAAATATGAGATGCATTGTTACAGGAAGTCCCTTGCC	PC Details: [Gridding Aid/Corner Marker]	chr7_-_5340026_5343473	ACTB	-	actin, beta
hSQ025392	60	GATTGCACATTGTTGTTTTTTTAATAGTCATTCCAAATATGAGATGCATTGTTACAGGAAGTCCCTTGCC	PC Details: [Gridding Aid/Corner Marker]	chr7_-_5340026_5343473	ACTB	-	actin, beta
hSQ025392	60	GATTGCACATTGTTGTTTTTTTAATAGTCATTCCAAATATGAGATGCATTGTTACAGGAAGTCCCTTGCC	PC Details: [Gridding Aid/Corner Marker]	chr7_-_5340026_5343473	ACTB	-	actin, beta
hSQ025392	60	GATTGCACATTGTTGTTTTTTTAATAGTCATTCCAAATATGAGATGCATTGTTACAGGAAGTCCCTTGCC	PC Details: [Gridding Aid/Corner Marker]	chr7_-_5340026_5343473	ACTB	-	actin, beta
hSQ025392	60	GATTGCACATTGTTGTTTTTTTAATAGTCATTCCAAATATGAGATGCATTGTTACAGGAAGTCCCTTGCC	PC Details: [Gridding Aid/Corner Marker]	chr7_-_5340026_5343473	ACTB	-	actin, beta
hSQ025392	60	GATTGCACATTGTTGTTTTTTTAATAGTCATTCCAAATATGAGATGCATTGTTACAGGAAGTCCCTTGCC	PC Details: [Gridding Aid/Corner Marker]	chr7_-_5340026_5343473	ACTB	-	actin, beta
hSQ025392	60	GATTGCACATTGTTGTTTTTTTAATAGTCATTCCAAATATGAGATGCATTGTTACAGGAAGTCCCTTGCC	PC Details: [Gridding Aid/Corner Marker]	chr7_-_5340026_5343473	ACTB	-	actin, beta
hSQ025392	60	GATTGCACATTGTTGTTTTTTTAATAGTCATTCCAAATATGAGATGCATTGTTACAGGAAGTCCCTTGCC	PC Details: [Gridding Aid/Corner Marker]	chr7_-_5340026_5343473	ACTB	-	actin, beta
hSQ025392	60	GATTGCACATTGTTGTTTTTTTAATAGTCATTCCAAATATGAGATGCATTGTTACAGGAAGTCCCTTGCC	PC Details: [Gridding Aid/Corner Marker]	chr7_-_5340026_5343473	ACTB	-	actin, beta
hSQ025392	60	GATTGCACATTGTTGTTTTTTTAATAGTCATTCCAAATATGAGATGCATTGTTACAGGAAGTCCCTTGCC	PC Details: [Gridding Aid/Corner Marker]	chr7_-_5340026_5343473	ACTB	-	actin, beta
hSQ025392	60	GATTGCACATTGTTGTTTTTTTAATAGTCATTCCAAATATGAGATGCATTGTTACAGGAAGTCCCTTGCC	PC Details: [Gridding Aid/Corner Marker]	chr7_-_5340026_5343473	ACTB	-	actin, beta
hSQ025392	60	GATTGCACATTGTTGTTTTTTTAATAGTCATTCCAAATATGAGATGCATTGTTACAGGAAGTCCCTTGCC	PC Details: [Gridding Aid/Corner Marker]	chr7_-_5340026_5343473	ACTB	-	actin, beta
hSQ025392	60	GATTGCACATTGTTGTTTTTTTAATAGTCATTCCAAATATGAGATGCATTGTTACAGGAAGTCCCTTGCC	PC Details: [Gridding Aid/Corner Marker]	chr7_-_5340026_5343473	ACTB	-	actin, beta
hSQ025392	60	GATTGCACATTGTTGTTTTTTTAATAGTCATTCCAAATATGAGATGCATTGTTACAGGAAGTCCCTTGCC	PC Details: [Gridding Aid/Corner Marker]	chr7_-_5340026_5343473	ACTB	-	actin, beta
hSQ025392	60	GATTGCACATTGTTGTTTTTTTAATAGTCATTCCAAATATGAGATGCATTGTTACAGGAAGTCCCTTGCC	PC Details: [Gridding Aid/Corner Marker]	chr7_-_5340026_5343473	ACTB	-	actin, beta
hSQ025392	60	GATTGCACATTGTTGTTTTTTTAATAGTCATTCCAAATATGAGATGCATTGTTACAGGAAGTCCCTTGCC	PC Details: [Gridding Aid/Corner Marker]	chr7_-_5340026_5343473	ACTB	-	actin, beta
hSQ025392	60	GATTGCACATTGTTGTTTTTTTAATAGTCATTCCAAATATGAGATGCATTGTTACAGGAAGTCCCTTGCC	PC Details: [Gridding Aid/Corner Marker]	chr7_-_5340026_5343473	ACTB	-	actin, beta
hSQ025392	60	GATTGCACATTGTTGTTTTTTTAATAGTCATTCCAAATATGAGATGCATTGTTACAGGAAGTCCCTTGCC	PC Details: [Gridding Aid/Corner Marker]	chr7_-_5340026_5343473	ACTB	-	actin, beta
hSQ025392	60	GATTGCACATTGTTGTTTTTTTAATAGTCATTCCAAATATGAGATGCATTGTTACAGGAAGTCCCTTGCC	PC Details: [Gridding Aid/Corner Marker]	chr7_-_5340026_5343473	ACTB	-	actin, beta
hSQ025392	60	GATTGCACATTGTTGTTTTTTTAATAGTCATTCCAAATATGAGATGCATTGTTACAGGAAGTCCCTTGCC	PC Details: [Gridding Aid/Corner Marker]	chr7_-_5340026_5343473	ACTB	-	actin, beta
hSQ025392	60	GATTGCACATTGTTGTTTTTTTAATAGTCATTCCAAATATGAGATGCATTGTTACAGGAAGTCCCTTGCC	PC Details: [Gridding Aid/Corner Marker]	chr7_-_5340026_5343473	ACTB	-	actin, beta
hSQ025392	60	GATTGCACATTGTTGTTTTTTTAATAGTCATTCCAAATATGAGATGCATTGTTACAGGAAGTCCCTTGCC	PC Details: [Gridding Aid/Corner Marker]	chr7_-_5340026_5343473	ACTB	-	actin, beta
hSQ025392	60	GATTGCACATTGTTGTTTTTTTAATAGTCATTCCAAATATGAGATGCATTGTTACAGGAAGTCCCTTGCC	PC Details: [Gridding Aid/Corner Marker]	chr7_-_5340026_5343473	ACTB	-	actin, beta
hSQ025392	60	GATTGCACATTGTTGTTTTTTTAATAGTCATTCCAAATATGAGATGCATTGTTACAGGAAGTCCCTTGCC	PC Details: [Gridding Aid/Corner Marker]	chr7_-_5340026_5343473	ACTB	-	actin, beta
hSQ025392	60	GATTGCACATTGTTGTTTTTTTAATAGTCATTCCAAATATGAGATGCATTGTTACAGGAAGTCCCTTGCC	PC Details: [Gridding Aid/Corner Marker]	chr7_-_5340026_5343473	ACTB	-	actin, beta
hSQ025392	60	GATTGCACATTGTTGTTTTTTTAATAGTCATTCCAAATATGAGATGCATTGTTACAGGAAGTCCCTTGCC	PC Details: [Gridding Aid/Corner Marker]	chr7_-_5340026_5343473	ACTB	-	actin, beta
hSQ025392	60	GATTGCACATTGTTGTTTTTTTAATAGTCATTCCAAATATGAGATGCATTGTTACAGGAAGTCCCTTGCC	PC Details: [Gridding Aid/Corner Marker]	chr7_-_5340026_5343473	ACTB	-	actin, beta
hSQ025392	60	GATTGCACATTGTTGTTTTTTTAATAGTCATTCCAAATATGAGATGCATTGTTACAGGAAGTCCCTTGCC	PC Details: [Gridding Aid/Corner Marker]	chr7_-_5340026_5343473	ACTB	-	actin, beta
hSQ025392	60	GATTGCACATTGTTGTTTTTTTAATAGTCATTCCAAATATGAGATGCATTGTTACAGGAAGTCCCTTGCC	PC Details: [Gridding Aid/Corner Marker]	chr7_-_5340026_5343473	ACTB	-	actin, beta
hSQ025392	60	GATTGCACATTGTTGTTTTTTTAATAGTCATTCCAAATATGAGATGCATTGTTACAGGAAGTCCCTTGCC	PC Details: [Gridding Aid/Corner Marker]	chr7_-_5340026_5343473	ACTB	-	actin, beta
hSQ025392	60	GATTGCACATTGTTGTTTTTTTAATAGTCATTCCAAATATGAGATGCATTGTTACAGGAAGTCCCTTGCC	PC Details: [Gridding Aid/Corner Marker]	chr7_-_5340026_5343473	ACTB	-	actin, beta
hSQ025392	60	GATTGCACATTGTTGTTTTTTTAATAGTCATTCCAAATATGAGATGCATTGTTACAGGAAGTCCCTTGCC	PC Details: [Gridding Aid/Corner Marker]	chr7_-_5340026_5343473	ACTB	-	actin, beta
hSQ025392	60	GATTGCACATTGTTGTTTTTTTAATAGTCATTCCAAATATGAGATGCATTGTTACAGGAAGTCCCTTGCC	PC Details: [Gridding Aid/Corner Marker]	chr7_-_5340026_5343473	ACTB	-	actin, beta
hSQ025392	60	GATTGCACATTGTTGTTTTTTTAATAGTCATTCCAAATATGAGATGCATTGTTACAGGAAGTCCCTTGCC	PC Details: [Gridding Aid/Corner Marker]	chr7_-_5340026_5343473	ACTB	-	actin, beta
hSQ021443	7534	CTTATAGCCTGCCTTCAATTTTGATCCTTTATTCTTTCTATTTGTCAGGTGCACAAGATTACCTTCCTGT	PC Details: [Normalization]	chr8_-_102000089_102034745	YWHAZ	KCIP-1|MGC111427|MGC126532|MGC138156	tyrosine 3-monooxygenase/tryptophan 5-monooxygenase activation protein, zeta polypeptide
hSQ038017	6389	TCCTTTGTGGACGTTGGCACTGGGAAGGTCACTCTGGAATATAGACCCGTAATCGACAAAACTTTGAACG	PC Details: [Normalization]	chr5_-_1625375_1627469	SDHA	FP|SDH2|SDHF	succinate dehydrogenase complex, subunit A, flavoprotein (Fp)
hSQ040268	3145	TGCCCAGCATGAAGATGGCCCTGAGGATGACCCACAGTTGGTAGGCATCACTGCTCGTAACATTCCACGA	PC Details: [Normalization]	chr11_+_118443700_118469468	HMBS	PBG-D|PBGD|UPS	hydroxymethylbilane synthase
hSQ002555	567	AAGTGGGATCGAGACATGTAAGCAGCATCATGGAGGTTTGAAGATGCCGCATTTGGATTGGATGAATTCC	PC Details: [Normalization]	chr15_+_42791008_42797634	B2M	-	beta-2-microglobulin
hSQ004178	2597	ACCAGGTGGTCTCCTCTGACTTCAACAGCGACACCCACTCCTCCACCTTTGACGCTGGGGCTGGCATTGC	PC Details: [Normalization]	chr12_+_6513917_6517798	GAPDH	G3PD|GAPD|MGC88685	glyceraldehyde-3-phosphate dehydrogenase
hSQ021443	7534	CTTATAGCCTGCCTTCAATTTTGATCCTTTATTCTTTCTATTTGTCAGGTGCACAAGATTACCTTCCTGT	PC Details: [Normalization]	chr8_-_102000089_102034745	YWHAZ	KCIP-1|MGC111427|MGC126532|MGC138156	tyrosine 3-monooxygenase/tryptophan 5-monooxygenase activation protein, zeta polypeptide
hSQ038017	6389	TCCTTTGTGGACGTTGGCACTGGGAAGGTCACTCTGGAATATAGACCCGTAATCGACAAAACTTTGAACG	PC Details: [Normalization]	chr5_-_1625375_1627469	SDHA	FP|SDH2|SDHF	succinate dehydrogenase complex, subunit A, flavoprotein (Fp)
hSQ040268	3145	TGCCCAGCATGAAGATGGCCCTGAGGATGACCCACAGTTGGTAGGCATCACTGCTCGTAACATTCCACGA	PC Details: [Normalization]	chr11_+_118443700_118469468	HMBS	PBG-D|PBGD|UPS	hydroxymethylbilane synthase
hSQ002555	567	AAGTGGGATCGAGACATGTAAGCAGCATCATGGAGGTTTGAAGATGCCGCATTTGGATTGGATGAATTCC	PC Details: [Normalization]	chr15_+_42791008_42797634	B2M	-	beta-2-microglobulin
hSQ004178	2597	ACCAGGTGGTCTCCTCTGACTTCAACAGCGACACCCACTCCTCCACCTTTGACGCTGGGGCTGGCATTGC	PC Details: [Normalization]	chr12_+_6513917_6517798	GAPDH	G3PD|GAPD|MGC88685	glyceraldehyde-3-phosphate dehydrogenase
hSQ021443	7534	CTTATAGCCTGCCTTCAATTTTGATCCTTTATTCTTTCTATTTGTCAGGTGCACAAGATTACCTTCCTGT	PC Details: [Normalization]	chr8_-_102000089_102034745	YWHAZ	KCIP-1|MGC111427|MGC126532|MGC138156	tyrosine 3-monooxygenase/tryptophan 5-monooxygenase activation protein, zeta polypeptide
hSQ038017	6389	TCCTTTGTGGACGTTGGCACTGGGAAGGTCACTCTGGAATATAGACCCGTAATCGACAAAACTTTGAACG	PC Details: [Normalization]	chr5_-_1625375_1627469	SDHA	FP|SDH2|SDHF	succinate dehydrogenase complex, subunit A, flavoprotein (Fp)
hSQ040268	3145	TGCCCAGCATGAAGATGGCCCTGAGGATGACCCACAGTTGGTAGGCATCACTGCTCGTAACATTCCACGA	PC Details: [Normalization]	chr11_+_118443700_118469468	HMBS	PBG-D|PBGD|UPS	hydroxymethylbilane synthase
hSQ002555	567	AAGTGGGATCGAGACATGTAAGCAGCATCATGGAGGTTTGAAGATGCCGCATTTGGATTGGATGAATTCC	PC Details: [Normalization]	chr15_+_42791008_42797634	B2M	-	beta-2-microglobulin
hSQ004178	2597	ACCAGGTGGTCTCCTCTGACTTCAACAGCGACACCCACTCCTCCACCTTTGACGCTGGGGCTGGCATTGC	PC Details: [Normalization]	chr12_+_6513917_6517798	GAPDH	G3PD|GAPD|MGC88685	glyceraldehyde-3-phosphate dehydrogenase
hSQ021443	7534	CTTATAGCCTGCCTTCAATTTTGATCCTTTATTCTTTCTATTTGTCAGGTGCACAAGATTACCTTCCTGT	PC Details: [Normalization]	chr8_-_102000089_102034745	YWHAZ	KCIP-1|MGC111427|MGC126532|MGC138156	tyrosine 3-monooxygenase/tryptophan 5-monooxygenase activation protein, zeta polypeptide
hSQ038017	6389	TCCTTTGTGGACGTTGGCACTGGGAAGGTCACTCTGGAATATAGACCCGTAATCGACAAAACTTTGAACG	PC Details: [Normalization]	chr5_-_1625375_1627469	SDHA	FP|SDH2|SDHF	succinate dehydrogenase complex, subunit A, flavoprotein (Fp)
hSQ040268	3145	TGCCCAGCATGAAGATGGCCCTGAGGATGACCCACAGTTGGTAGGCATCACTGCTCGTAACATTCCACGA	PC Details: [Normalization]	chr11_+_118443700_118469468	HMBS	PBG-D|PBGD|UPS	hydroxymethylbilane synthase
hSQ002555	567	AAGTGGGATCGAGACATGTAAGCAGCATCATGGAGGTTTGAAGATGCCGCATTTGGATTGGATGAATTCC	PC Details: [Normalization]	chr15_+_42791008_42797634	B2M	-	beta-2-microglobulin
hSQ004178	2597	ACCAGGTGGTCTCCTCTGACTTCAACAGCGACACCCACTCCTCCACCTTTGACGCTGGGGCTGGCATTGC	PC Details: [Normalization]	chr12_+_6513917_6517798	GAPDH	G3PD|GAPD|MGC88685	glyceraldehyde-3-phosphate dehydrogenase
hSQ021443	7534	CTTATAGCCTGCCTTCAATTTTGATCCTTTATTCTTTCTATTTGTCAGGTGCACAAGATTACCTTCCTGT	PC Details: [Normalization]	chr8_-_102000089_102034745	YWHAZ	KCIP-1|MGC111427|MGC126532|MGC138156	tyrosine 3-monooxygenase/tryptophan 5-monooxygenase activation protein, zeta polypeptide
hSQ038017	6389	TCCTTTGTGGACGTTGGCACTGGGAAGGTCACTCTGGAATATAGACCCGTAATCGACAAAACTTTGAACG	PC Details: [Normalization]	chr5_-_1625375_1627469	SDHA	FP|SDH2|SDHF	succinate dehydrogenase complex, subunit A, flavoprotein (Fp)
hSQ040268	3145	TGCCCAGCATGAAGATGGCCCTGAGGATGACCCACAGTTGGTAGGCATCACTGCTCGTAACATTCCACGA	PC Details: [Normalization]	chr11_+_118443700_118469468	HMBS	PBG-D|PBGD|UPS	hydroxymethylbilane synthase
hSQ002555	567	AAGTGGGATCGAGACATGTAAGCAGCATCATGGAGGTTTGAAGATGCCGCATTTGGATTGGATGAATTCC	PC Details: [Normalization]	chr15_+_42791008_42797634	B2M	-	beta-2-microglobulin
hSQ012541	6908	CACTGAGAACACCGCGCAGCGTGACTGTGAGTTGCTCATACCGTGCTGCTATCTGGGCAGCGCTGCCCAT	PC Details: [Normalization]	chr6_+_170781090_170799578	TBP	GTF2D|GTF2D1|MGC117320|MGC126054|MGC126055|SCA17|TFIID	TATA box binding protein
hSQ021313	3251	CTGTTTATTTGCACTATGAGCCTATAGACTATCAGTTCCCTTTGGGCGGATTGTTGTTTAACTTGTAAAT	PC Details: [Normalization]	chrX_+_133319776_133360216	HPRT1	HGPRT|HPRT	hypoxanthine phosphoribosyltransferase 1 (Lesch-Nyhan syndrome)
hSQ018331	23521	CGGACTCCTGGTCTGAGCCCAATAAAGACTGTTAATTCCTCATGCGTTGCCTGCCCTTCCTCCATTGTTG	PC Details: [Normalization]	chr19_+_54682675_54687374	RPL13A	-	ribosomal protein L13a
hSQ012653	7316	CACTTGGTCCTGCGCTTGAGGGGGGGTGTCTAAGTTTCCCCTTTTAAGGTTTCAACAAATTTCATTGCAC	PC Details: [Normalization]	chr12_-_123921071_123924080	UBC	HMG20	ubiquitin C
hSQ025392	60	GATTGCACATTGTTGTTTTTTTAATAGTCATTCCAAATATGAGATGCATTGTTACAGGAAGTCCCTTGCC	PC Details: [Normalization]	chr7_-_5340026_5343473	ACTB	-	actin, beta
hSQ012541	6908	CACTGAGAACACCGCGCAGCGTGACTGTGAGTTGCTCATACCGTGCTGCTATCTGGGCAGCGCTGCCCAT	PC Details: [Normalization]	chr6_+_170781090_170799578	TBP	GTF2D|GTF2D1|MGC117320|MGC126054|MGC126055|SCA17|TFIID	TATA box binding protein
hSQ021313	3251	CTGTTTATTTGCACTATGAGCCTATAGACTATCAGTTCCCTTTGGGCGGATTGTTGTTTAACTTGTAAAT	PC Details: [Normalization]	chrX_+_133319776_133360216	HPRT1	HGPRT|HPRT	hypoxanthine phosphoribosyltransferase 1 (Lesch-Nyhan syndrome)
hSQ018331	23521	CGGACTCCTGGTCTGAGCCCAATAAAGACTGTTAATTCCTCATGCGTTGCCTGCCCTTCCTCCATTGTTG	PC Details: [Normalization]	chr19_+_54682675_54687374	RPL13A	-	ribosomal protein L13a
hSQ012653	7316	CACTTGGTCCTGCGCTTGAGGGGGGGTGTCTAAGTTTCCCCTTTTAAGGTTTCAACAAATTTCATTGCAC	PC Details: [Normalization]	chr12_-_123921071_123924080	UBC	HMG20	ubiquitin C
hSQ025392	60	GATTGCACATTGTTGTTTTTTTAATAGTCATTCCAAATATGAGATGCATTGTTACAGGAAGTCCCTTGCC	PC Details: [Normalization]	chr7_-_5340026_5343473	ACTB	-	actin, beta
hSQ012541	6908	CACTGAGAACACCGCGCAGCGTGACTGTGAGTTGCTCATACCGTGCTGCTATCTGGGCAGCGCTGCCCAT	PC Details: [Normalization]	chr6_+_170781090_170799578	TBP	GTF2D|GTF2D1|MGC117320|MGC126054|MGC126055|SCA17|TFIID	TATA box binding protein
hSQ021313	3251	CTGTTTATTTGCACTATGAGCCTATAGACTATCAGTTCCCTTTGGGCGGATTGTTGTTTAACTTGTAAAT	PC Details: [Normalization]	chrX_+_133319776_133360216	HPRT1	HGPRT|HPRT	hypoxanthine phosphoribosyltransferase 1 (Lesch-Nyhan syndrome)
hSQ018331	23521	CGGACTCCTGGTCTGAGCCCAATAAAGACTGTTAATTCCTCATGCGTTGCCTGCCCTTCCTCCATTGTTG	PC Details: [Normalization]	chr19_+_54682675_54687374	RPL13A	-	ribosomal protein L13a
hSQ012653	7316	CACTTGGTCCTGCGCTTGAGGGGGGGTGTCTAAGTTTCCCCTTTTAAGGTTTCAACAAATTTCATTGCAC	PC Details: [Normalization]	chr12_-_123921071_123924080	UBC	HMG20	ubiquitin C
hSQ025392	60	GATTGCACATTGTTGTTTTTTTAATAGTCATTCCAAATATGAGATGCATTGTTACAGGAAGTCCCTTGCC	PC Details: [Normalization]	chr7_-_5340026_5343473	ACTB	-	actin, beta
hSQ012541	6908	CACTGAGAACACCGCGCAGCGTGACTGTGAGTTGCTCATACCGTGCTGCTATCTGGGCAGCGCTGCCCAT	PC Details: [Normalization]	chr6_+_170781090_170799578	TBP	GTF2D|GTF2D1|MGC117320|MGC126054|MGC126055|SCA17|TFIID	TATA box binding protein
hSQ021313	3251	CTGTTTATTTGCACTATGAGCCTATAGACTATCAGTTCCCTTTGGGCGGATTGTTGTTTAACTTGTAAAT	PC Details: [Normalization]	chrX_+_133319776_133360216	HPRT1	HGPRT|HPRT	hypoxanthine phosphoribosyltransferase 1 (Lesch-Nyhan syndrome)
hSQ018331	23521	CGGACTCCTGGTCTGAGCCCAATAAAGACTGTTAATTCCTCATGCGTTGCCTGCCCTTCCTCCATTGTTG	PC Details: [Normalization]	chr19_+_54682675_54687374	RPL13A	-	ribosomal protein L13a
hSQ012653	7316	CACTTGGTCCTGCGCTTGAGGGGGGGTGTCTAAGTTTCCCCTTTTAAGGTTTCAACAAATTTCATTGCAC	PC Details: [Normalization]	chr12_-_123921071_123924080	UBC	HMG20	ubiquitin C
hSQ025392	60	GATTGCACATTGTTGTTTTTTTAATAGTCATTCCAAATATGAGATGCATTGTTACAGGAAGTCCCTTGCC	PC Details: [Normalization]	chr7_-_5340026_5343473	ACTB	-	actin, beta
hSQ012541	6908	CACTGAGAACACCGCGCAGCGTGACTGTGAGTTGCTCATACCGTGCTGCTATCTGGGCAGCGCTGCCCAT	PC Details: [Normalization]	chr6_+_170781090_170799578	TBP	GTF2D|GTF2D1|MGC117320|MGC126054|MGC126055|SCA17|TFIID	TATA box binding protein
hSQ021313	3251	CTGTTTATTTGCACTATGAGCCTATAGACTATCAGTTCCCTTTGGGCGGATTGTTGTTTAACTTGTAAAT	PC Details: [Normalization]	chrX_+_133319776_133360216	HPRT1	HGPRT|HPRT	hypoxanthine phosphoribosyltransferase 1 (Lesch-Nyhan syndrome)
hSQ018331	23521	CGGACTCCTGGTCTGAGCCCAATAAAGACTGTTAATTCCTCATGCGTTGCCTGCCCTTCCTCCATTGTTG	PC Details: [Normalization]	chr19_+_54682675_54687374	RPL13A	-	ribosomal protein L13a
hSQ012653	7316	CACTTGGTCCTGCGCTTGAGGGGGGGTGTCTAAGTTTCCCCTTTTAAGGTTTCAACAAATTTCATTGCAC	PC Details: [Normalization]	chr12_-_123921071_123924080	UBC	HMG20	ubiquitin C
hSQ040268	3145	TGCCCAGCATGAAGATGGCCCTGAGGATGACCCACAGTTGGTAGGCATCACTGCTCGTAACATTCCACGA	PC Details: [Normalization]	chr11_+_118443700_118469468	HMBS	PBG-D|PBGD|UPS	hydroxymethylbilane synthase
hSQ002555	567	AAGTGGGATCGAGACATGTAAGCAGCATCATGGAGGTTTGAAGATGCCGCATTTGGATTGGATGAATTCC	PC Details: [Normalization]	chr15_+_42791008_42797634	B2M	-	beta-2-microglobulin
hSQ004178	2597	ACCAGGTGGTCTCCTCTGACTTCAACAGCGACACCCACTCCTCCACCTTTGACGCTGGGGCTGGCATTGC	PC Details: [Normalization]	chr12_+_6513917_6517798	GAPDH	G3PD|GAPD|MGC88685	glyceraldehyde-3-phosphate dehydrogenase
hSQ021443	7534	CTTATAGCCTGCCTTCAATTTTGATCCTTTATTCTTTCTATTTGTCAGGTGCACAAGATTACCTTCCTGT	PC Details: [Normalization]	chr8_-_102000089_102034745	YWHAZ	KCIP-1|MGC111427|MGC126532|MGC138156	tyrosine 3-monooxygenase/tryptophan 5-monooxygenase activation protein, zeta polypeptide
hSQ038017	6389	TCCTTTGTGGACGTTGGCACTGGGAAGGTCACTCTGGAATATAGACCCGTAATCGACAAAACTTTGAACG	PC Details: [Normalization]	chr5_-_1625375_1627469	SDHA	FP|SDH2|SDHF	succinate dehydrogenase complex, subunit A, flavoprotein (Fp)
hSQ040268	3145	TGCCCAGCATGAAGATGGCCCTGAGGATGACCCACAGTTGGTAGGCATCACTGCTCGTAACATTCCACGA	PC Details: [Normalization]	chr11_+_118443700_118469468	HMBS	PBG-D|PBGD|UPS	hydroxymethylbilane synthase
hSQ002555	567	AAGTGGGATCGAGACATGTAAGCAGCATCATGGAGGTTTGAAGATGCCGCATTTGGATTGGATGAATTCC	PC Details: [Normalization]	chr15_+_42791008_42797634	B2M	-	beta-2-microglobulin
hSQ004178	2597	ACCAGGTGGTCTCCTCTGACTTCAACAGCGACACCCACTCCTCCACCTTTGACGCTGGGGCTGGCATTGC	PC Details: [Normalization]	chr12_+_6513917_6517798	GAPDH	G3PD|GAPD|MGC88685	glyceraldehyde-3-phosphate dehydrogenase
hSQ021443	7534	CTTATAGCCTGCCTTCAATTTTGATCCTTTATTCTTTCTATTTGTCAGGTGCACAAGATTACCTTCCTGT	PC Details: [Normalization]	chr8_-_102000089_102034745	YWHAZ	KCIP-1|MGC111427|MGC126532|MGC138156	tyrosine 3-monooxygenase/tryptophan 5-monooxygenase activation protein, zeta polypeptide
hSQ038017	6389	TCCTTTGTGGACGTTGGCACTGGGAAGGTCACTCTGGAATATAGACCCGTAATCGACAAAACTTTGAACG	PC Details: [Normalization]	chr5_-_1625375_1627469	SDHA	FP|SDH2|SDHF	succinate dehydrogenase complex, subunit A, flavoprotein (Fp)
hSQ040268	3145	TGCCCAGCATGAAGATGGCCCTGAGGATGACCCACAGTTGGTAGGCATCACTGCTCGTAACATTCCACGA	PC Details: [Normalization]	chr11_+_118443700_118469468	HMBS	PBG-D|PBGD|UPS	hydroxymethylbilane synthase
hSQ002555	567	AAGTGGGATCGAGACATGTAAGCAGCATCATGGAGGTTTGAAGATGCCGCATTTGGATTGGATGAATTCC	PC Details: [Normalization]	chr15_+_42791008_42797634	B2M	-	beta-2-microglobulin
hSQ004178	2597	ACCAGGTGGTCTCCTCTGACTTCAACAGCGACACCCACTCCTCCACCTTTGACGCTGGGGCTGGCATTGC	PC Details: [Normalization]	chr12_+_6513917_6517798	GAPDH	G3PD|GAPD|MGC88685	glyceraldehyde-3-phosphate dehydrogenase
hSQ021443	7534	CTTATAGCCTGCCTTCAATTTTGATCCTTTATTCTTTCTATTTGTCAGGTGCACAAGATTACCTTCCTGT	PC Details: [Normalization]	chr8_-_102000089_102034745	YWHAZ	KCIP-1|MGC111427|MGC126532|MGC138156	tyrosine 3-monooxygenase/tryptophan 5-monooxygenase activation protein, zeta polypeptide
hSQ038017	6389	TCCTTTGTGGACGTTGGCACTGGGAAGGTCACTCTGGAATATAGACCCGTAATCGACAAAACTTTGAACG	PC Details: [Normalization]	chr5_-_1625375_1627469	SDHA	FP|SDH2|SDHF	succinate dehydrogenase complex, subunit A, flavoprotein (Fp)
hSQ040268	3145	TGCCCAGCATGAAGATGGCCCTGAGGATGACCCACAGTTGGTAGGCATCACTGCTCGTAACATTCCACGA	PC Details: [Normalization]	chr11_+_118443700_118469468	HMBS	PBG-D|PBGD|UPS	hydroxymethylbilane synthase
hSQ002555	567	AAGTGGGATCGAGACATGTAAGCAGCATCATGGAGGTTTGAAGATGCCGCATTTGGATTGGATGAATTCC	PC Details: [Normalization]	chr15_+_42791008_42797634	B2M	-	beta-2-microglobulin
hSQ004178	2597	ACCAGGTGGTCTCCTCTGACTTCAACAGCGACACCCACTCCTCCACCTTTGACGCTGGGGCTGGCATTGC	PC Details: [Normalization]	chr12_+_6513917_6517798	GAPDH	G3PD|GAPD|MGC88685	glyceraldehyde-3-phosphate dehydrogenase
hSQ021443	7534	CTTATAGCCTGCCTTCAATTTTGATCCTTTATTCTTTCTATTTGTCAGGTGCACAAGATTACCTTCCTGT	PC Details: [Normalization]	chr8_-_102000089_102034745	YWHAZ	KCIP-1|MGC111427|MGC126532|MGC138156	tyrosine 3-monooxygenase/tryptophan 5-monooxygenase activation protein, zeta polypeptide
hSQ038017	6389	TCCTTTGTGGACGTTGGCACTGGGAAGGTCACTCTGGAATATAGACCCGTAATCGACAAAACTTTGAACG	PC Details: [Normalization]	chr5_-_1625375_1627469	SDHA	FP|SDH2|SDHF	succinate dehydrogenase complex, subunit A, flavoprotein (Fp)
hSQ040268	3145	TGCCCAGCATGAAGATGGCCCTGAGGATGACCCACAGTTGGTAGGCATCACTGCTCGTAACATTCCACGA	PC Details: [Normalization]	chr11_+_118443700_118469468	HMBS	PBG-D|PBGD|UPS	hydroxymethylbilane synthase
hSQ002555	567	AAGTGGGATCGAGACATGTAAGCAGCATCATGGAGGTTTGAAGATGCCGCATTTGGATTGGATGAATTCC	PC Details: [Normalization]	chr15_+_42791008_42797634	B2M	-	beta-2-microglobulin
hSQ004178	2597	ACCAGGTGGTCTCCTCTGACTTCAACAGCGACACCCACTCCTCCACCTTTGACGCTGGGGCTGGCATTGC	PC Details: [Normalization]	chr12_+_6513917_6517798	GAPDH	G3PD|GAPD|MGC88685	glyceraldehyde-3-phosphate dehydrogenase
hSQ021443	7534	CTTATAGCCTGCCTTCAATTTTGATCCTTTATTCTTTCTATTTGTCAGGTGCACAAGATTACCTTCCTGT	PC Details: [Normalization]	chr8_-_102000089_102034745	YWHAZ	KCIP-1|MGC111427|MGC126532|MGC138156	tyrosine 3-monooxygenase/tryptophan 5-monooxygenase activation protein, zeta polypeptide
hSQ018331	23521	CGGACTCCTGGTCTGAGCCCAATAAAGACTGTTAATTCCTCATGCGTTGCCTGCCCTTCCTCCATTGTTG	PC Details: [Normalization]	chr19_+_54682675_54687374	RPL13A	-	ribosomal protein L13a
hSQ012653	7316	CACTTGGTCCTGCGCTTGAGGGGGGGTGTCTAAGTTTCCCCTTTTAAGGTTTCAACAAATTTCATTGCAC	PC Details: [Normalization]	chr12_-_123921071_123924080	UBC	HMG20	ubiquitin C
hSQ025392	60	GATTGCACATTGTTGTTTTTTTAATAGTCATTCCAAATATGAGATGCATTGTTACAGGAAGTCCCTTGCC	PC Details: [Normalization]	chr7_-_5340026_5343473	ACTB	-	actin, beta
hSQ012541	6908	CACTGAGAACACCGCGCAGCGTGACTGTGAGTTGCTCATACCGTGCTGCTATCTGGGCAGCGCTGCCCAT	PC Details: [Normalization]	chr6_+_170781090_170799578	TBP	GTF2D|GTF2D1|MGC117320|MGC126054|MGC126055|SCA17|TFIID	TATA box binding protein
hSQ021313	3251	CTGTTTATTTGCACTATGAGCCTATAGACTATCAGTTCCCTTTGGGCGGATTGTTGTTTAACTTGTAAAT	PC Details: [Normalization]	chrX_+_133319776_133360216	HPRT1	HGPRT|HPRT	hypoxanthine phosphoribosyltransferase 1 (Lesch-Nyhan syndrome)
hSQ018331	23521	CGGACTCCTGGTCTGAGCCCAATAAAGACTGTTAATTCCTCATGCGTTGCCTGCCCTTCCTCCATTGTTG	PC Details: [Normalization]	chr19_+_54682675_54687374	RPL13A	-	ribosomal protein L13a
hSQ012653	7316	CACTTGGTCCTGCGCTTGAGGGGGGGTGTCTAAGTTTCCCCTTTTAAGGTTTCAACAAATTTCATTGCAC	PC Details: [Normalization]	chr12_-_123921071_123924080	UBC	HMG20	ubiquitin C
hSQ025392	60	GATTGCACATTGTTGTTTTTTTAATAGTCATTCCAAATATGAGATGCATTGTTACAGGAAGTCCCTTGCC	PC Details: [Normalization]	chr7_-_5340026_5343473	ACTB	-	actin, beta
hSQ012541	6908	CACTGAGAACACCGCGCAGCGTGACTGTGAGTTGCTCATACCGTGCTGCTATCTGGGCAGCGCTGCCCAT	PC Details: [Normalization]	chr6_+_170781090_170799578	TBP	GTF2D|GTF2D1|MGC117320|MGC126054|MGC126055|SCA17|TFIID	TATA box binding protein
hSQ021313	3251	CTGTTTATTTGCACTATGAGCCTATAGACTATCAGTTCCCTTTGGGCGGATTGTTGTTTAACTTGTAAAT	PC Details: [Normalization]	chrX_+_133319776_133360216	HPRT1	HGPRT|HPRT	hypoxanthine phosphoribosyltransferase 1 (Lesch-Nyhan syndrome)
hSQ018331	23521	CGGACTCCTGGTCTGAGCCCAATAAAGACTGTTAATTCCTCATGCGTTGCCTGCCCTTCCTCCATTGTTG	PC Details: [Normalization]	chr19_+_54682675_54687374	RPL13A	-	ribosomal protein L13a
hSQ012653	7316	CACTTGGTCCTGCGCTTGAGGGGGGGTGTCTAAGTTTCCCCTTTTAAGGTTTCAACAAATTTCATTGCAC	PC Details: [Normalization]	chr12_-_123921071_123924080	UBC	HMG20	ubiquitin C
hSQ025392	60	GATTGCACATTGTTGTTTTTTTAATAGTCATTCCAAATATGAGATGCATTGTTACAGGAAGTCCCTTGCC	PC Details: [Normalization]	chr7_-_5340026_5343473	ACTB	-	actin, beta
hSQ012541	6908	CACTGAGAACACCGCGCAGCGTGACTGTGAGTTGCTCATACCGTGCTGCTATCTGGGCAGCGCTGCCCAT	PC Details: [Normalization]	chr6_+_170781090_170799578	TBP	GTF2D|GTF2D1|MGC117320|MGC126054|MGC126055|SCA17|TFIID	TATA box binding protein
hSQ021313	3251	CTGTTTATTTGCACTATGAGCCTATAGACTATCAGTTCCCTTTGGGCGGATTGTTGTTTAACTTGTAAAT	PC Details: [Normalization]	chrX_+_133319776_133360216	HPRT1	HGPRT|HPRT	hypoxanthine phosphoribosyltransferase 1 (Lesch-Nyhan syndrome)
hSQ018331	23521	CGGACTCCTGGTCTGAGCCCAATAAAGACTGTTAATTCCTCATGCGTTGCCTGCCCTTCCTCCATTGTTG	PC Details: [Normalization]	chr19_+_54682675_54687374	RPL13A	-	ribosomal protein L13a
hSQ012653	7316	CACTTGGTCCTGCGCTTGAGGGGGGGTGTCTAAGTTTCCCCTTTTAAGGTTTCAACAAATTTCATTGCAC	PC Details: [Normalization]	chr12_-_123921071_123924080	UBC	HMG20	ubiquitin C
hSQ025392	60	GATTGCACATTGTTGTTTTTTTAATAGTCATTCCAAATATGAGATGCATTGTTACAGGAAGTCCCTTGCC	PC Details: [Normalization]	chr7_-_5340026_5343473	ACTB	-	actin, beta
hSQ012541	6908	CACTGAGAACACCGCGCAGCGTGACTGTGAGTTGCTCATACCGTGCTGCTATCTGGGCAGCGCTGCCCAT	PC Details: [Normalization]	chr6_+_170781090_170799578	TBP	GTF2D|GTF2D1|MGC117320|MGC126054|MGC126055|SCA17|TFIID	TATA box binding protein
hSQ021313	3251	CTGTTTATTTGCACTATGAGCCTATAGACTATCAGTTCCCTTTGGGCGGATTGTTGTTTAACTTGTAAAT	PC Details: [Normalization]	chrX_+_133319776_133360216	HPRT1	HGPRT|HPRT	hypoxanthine phosphoribosyltransferase 1 (Lesch-Nyhan syndrome)
hSQ018331	23521	CGGACTCCTGGTCTGAGCCCAATAAAGACTGTTAATTCCTCATGCGTTGCCTGCCCTTCCTCCATTGTTG	PC Details: [Normalization]	chr19_+_54682675_54687374	RPL13A	-	ribosomal protein L13a
hSQ012653	7316	CACTTGGTCCTGCGCTTGAGGGGGGGTGTCTAAGTTTCCCCTTTTAAGGTTTCAACAAATTTCATTGCAC	PC Details: [Normalization]	chr12_-_123921071_123924080	UBC	HMG20	ubiquitin C
hSQ025392	60	GATTGCACATTGTTGTTTTTTTAATAGTCATTCCAAATATGAGATGCATTGTTACAGGAAGTCCCTTGCC	PC Details: [Normalization]	chr7_-_5340026_5343473	ACTB	-	actin, beta
hSQ012541	6908	CACTGAGAACACCGCGCAGCGTGACTGTGAGTTGCTCATACCGTGCTGCTATCTGGGCAGCGCTGCCCAT	PC Details: [Normalization]	chr6_+_170781090_170799578	TBP	GTF2D|GTF2D1|MGC117320|MGC126054|MGC126055|SCA17|TFIID	TATA box binding protein
hSQ004178	2597	ACCAGGTGGTCTCCTCTGACTTCAACAGCGACACCCACTCCTCCACCTTTGACGCTGGGGCTGGCATTGC	PC Details: [Normalization]	chr12_+_6513917_6517798	GAPDH	G3PD|GAPD|MGC88685	glyceraldehyde-3-phosphate dehydrogenase
hSQ021443	7534	CTTATAGCCTGCCTTCAATTTTGATCCTTTATTCTTTCTATTTGTCAGGTGCACAAGATTACCTTCCTGT	PC Details: [Normalization]	chr8_-_102000089_102034745	YWHAZ	KCIP-1|MGC111427|MGC126532|MGC138156	tyrosine 3-monooxygenase/tryptophan 5-monooxygenase activation protein, zeta polypeptide
hSQ038017	6389	TCCTTTGTGGACGTTGGCACTGGGAAGGTCACTCTGGAATATAGACCCGTAATCGACAAAACTTTGAACG	PC Details: [Normalization]	chr5_-_1625375_1627469	SDHA	FP|SDH2|SDHF	succinate dehydrogenase complex, subunit A, flavoprotein (Fp)
hSQ040268	3145	TGCCCAGCATGAAGATGGCCCTGAGGATGACCCACAGTTGGTAGGCATCACTGCTCGTAACATTCCACGA	PC Details: [Normalization]	chr11_+_118443700_118469468	HMBS	PBG-D|PBGD|UPS	hydroxymethylbilane synthase
hSQ002555	567	AAGTGGGATCGAGACATGTAAGCAGCATCATGGAGGTTTGAAGATGCCGCATTTGGATTGGATGAATTCC	PC Details: [Normalization]	chr15_+_42791008_42797634	B2M	-	beta-2-microglobulin
hSQ004178	2597	ACCAGGTGGTCTCCTCTGACTTCAACAGCGACACCCACTCCTCCACCTTTGACGCTGGGGCTGGCATTGC	PC Details: [Normalization]	chr12_+_6513917_6517798	GAPDH	G3PD|GAPD|MGC88685	glyceraldehyde-3-phosphate dehydrogenase
hSQ021443	7534	CTTATAGCCTGCCTTCAATTTTGATCCTTTATTCTTTCTATTTGTCAGGTGCACAAGATTACCTTCCTGT	PC Details: [Normalization]	chr8_-_102000089_102034745	YWHAZ	KCIP-1|MGC111427|MGC126532|MGC138156	tyrosine 3-monooxygenase/tryptophan 5-monooxygenase activation protein, zeta polypeptide
hSQ038017	6389	TCCTTTGTGGACGTTGGCACTGGGAAGGTCACTCTGGAATATAGACCCGTAATCGACAAAACTTTGAACG	PC Details: [Normalization]	chr5_-_1625375_1627469	SDHA	FP|SDH2|SDHF	succinate dehydrogenase complex, subunit A, flavoprotein (Fp)
hSQ040268	3145	TGCCCAGCATGAAGATGGCCCTGAGGATGACCCACAGTTGGTAGGCATCACTGCTCGTAACATTCCACGA	PC Details: [Normalization]	chr11_+_118443700_118469468	HMBS	PBG-D|PBGD|UPS	hydroxymethylbilane synthase
hSQ002555	567	AAGTGGGATCGAGACATGTAAGCAGCATCATGGAGGTTTGAAGATGCCGCATTTGGATTGGATGAATTCC	PC Details: [Normalization]	chr15_+_42791008_42797634	B2M	-	beta-2-microglobulin
hSQ004178	2597	ACCAGGTGGTCTCCTCTGACTTCAACAGCGACACCCACTCCTCCACCTTTGACGCTGGGGCTGGCATTGC	PC Details: [Normalization]	chr12_+_6513917_6517798	GAPDH	G3PD|GAPD|MGC88685	glyceraldehyde-3-phosphate dehydrogenase
hSQ021443	7534	CTTATAGCCTGCCTTCAATTTTGATCCTTTATTCTTTCTATTTGTCAGGTGCACAAGATTACCTTCCTGT	PC Details: [Normalization]	chr8_-_102000089_102034745	YWHAZ	KCIP-1|MGC111427|MGC126532|MGC138156	tyrosine 3-monooxygenase/tryptophan 5-monooxygenase activation protein, zeta polypeptide
hSQ038017	6389	TCCTTTGTGGACGTTGGCACTGGGAAGGTCACTCTGGAATATAGACCCGTAATCGACAAAACTTTGAACG	PC Details: [Normalization]	chr5_-_1625375_1627469	SDHA	FP|SDH2|SDHF	succinate dehydrogenase complex, subunit A, flavoprotein (Fp)
hSQ040268	3145	TGCCCAGCATGAAGATGGCCCTGAGGATGACCCACAGTTGGTAGGCATCACTGCTCGTAACATTCCACGA	PC Details: [Normalization]	chr11_+_118443700_118469468	HMBS	PBG-D|PBGD|UPS	hydroxymethylbilane synthase
hSQ002555	567	AAGTGGGATCGAGACATGTAAGCAGCATCATGGAGGTTTGAAGATGCCGCATTTGGATTGGATGAATTCC	PC Details: [Normalization]	chr15_+_42791008_42797634	B2M	-	beta-2-microglobulin
hSQ004178	2597	ACCAGGTGGTCTCCTCTGACTTCAACAGCGACACCCACTCCTCCACCTTTGACGCTGGGGCTGGCATTGC	PC Details: [Normalization]	chr12_+_6513917_6517798	GAPDH	G3PD|GAPD|MGC88685	glyceraldehyde-3-phosphate dehydrogenase
hSQ021443	7534	CTTATAGCCTGCCTTCAATTTTGATCCTTTATTCTTTCTATTTGTCAGGTGCACAAGATTACCTTCCTGT	PC Details: [Normalization]	chr8_-_102000089_102034745	YWHAZ	KCIP-1|MGC111427|MGC126532|MGC138156	tyrosine 3-monooxygenase/tryptophan 5-monooxygenase activation protein, zeta polypeptide
hSQ038017	6389	TCCTTTGTGGACGTTGGCACTGGGAAGGTCACTCTGGAATATAGACCCGTAATCGACAAAACTTTGAACG	PC Details: [Normalization]	chr5_-_1625375_1627469	SDHA	FP|SDH2|SDHF	succinate dehydrogenase complex, subunit A, flavoprotein (Fp)
hSQ040268	3145	TGCCCAGCATGAAGATGGCCCTGAGGATGACCCACAGTTGGTAGGCATCACTGCTCGTAACATTCCACGA	PC Details: [Normalization]	chr11_+_118443700_118469468	HMBS	PBG-D|PBGD|UPS	hydroxymethylbilane synthase
hSQ002555	567	AAGTGGGATCGAGACATGTAAGCAGCATCATGGAGGTTTGAAGATGCCGCATTTGGATTGGATGAATTCC	PC Details: [Normalization]	chr15_+_42791008_42797634	B2M	-	beta-2-microglobulin
hSQ004178	2597	ACCAGGTGGTCTCCTCTGACTTCAACAGCGACACCCACTCCTCCACCTTTGACGCTGGGGCTGGCATTGC	PC Details: [Normalization]	chr12_+_6513917_6517798	GAPDH	G3PD|GAPD|MGC88685	glyceraldehyde-3-phosphate dehydrogenase
hSQ021443	7534	CTTATAGCCTGCCTTCAATTTTGATCCTTTATTCTTTCTATTTGTCAGGTGCACAAGATTACCTTCCTGT	PC Details: [Normalization]	chr8_-_102000089_102034745	YWHAZ	KCIP-1|MGC111427|MGC126532|MGC138156	tyrosine 3-monooxygenase/tryptophan 5-monooxygenase activation protein, zeta polypeptide
hSQ038017	6389	TCCTTTGTGGACGTTGGCACTGGGAAGGTCACTCTGGAATATAGACCCGTAATCGACAAAACTTTGAACG	PC Details: [Normalization]	chr5_-_1625375_1627469	SDHA	FP|SDH2|SDHF	succinate dehydrogenase complex, subunit A, flavoprotein (Fp)
hSQ040268	3145	TGCCCAGCATGAAGATGGCCCTGAGGATGACCCACAGTTGGTAGGCATCACTGCTCGTAACATTCCACGA	PC Details: [Normalization]	chr11_+_118443700_118469468	HMBS	PBG-D|PBGD|UPS	hydroxymethylbilane synthase
hSQ025392	60	GATTGCACATTGTTGTTTTTTTAATAGTCATTCCAAATATGAGATGCATTGTTACAGGAAGTCCCTTGCC	PC Details: [Normalization]	chr7_-_5340026_5343473	ACTB	-	actin, beta
hSQ012541	6908	CACTGAGAACACCGCGCAGCGTGACTGTGAGTTGCTCATACCGTGCTGCTATCTGGGCAGCGCTGCCCAT	PC Details: [Normalization]	chr6_+_170781090_170799578	TBP	GTF2D|GTF2D1|MGC117320|MGC126054|MGC126055|SCA17|TFIID	TATA box binding protein
hSQ021313	3251	CTGTTTATTTGCACTATGAGCCTATAGACTATCAGTTCCCTTTGGGCGGATTGTTGTTTAACTTGTAAAT	PC Details: [Normalization]	chrX_+_133319776_133360216	HPRT1	HGPRT|HPRT	hypoxanthine phosphoribosyltransferase 1 (Lesch-Nyhan syndrome)
hSQ018331	23521	CGGACTCCTGGTCTGAGCCCAATAAAGACTGTTAATTCCTCATGCGTTGCCTGCCCTTCCTCCATTGTTG	PC Details: [Normalization]	chr19_+_54682675_54687374	RPL13A	-	ribosomal protein L13a
hSQ012653	7316	CACTTGGTCCTGCGCTTGAGGGGGGGTGTCTAAGTTTCCCCTTTTAAGGTTTCAACAAATTTCATTGCAC	PC Details: [Normalization]	chr12_-_123921071_123924080	UBC	HMG20	ubiquitin C
hSQ025392	60	GATTGCACATTGTTGTTTTTTTAATAGTCATTCCAAATATGAGATGCATTGTTACAGGAAGTCCCTTGCC	PC Details: [Normalization]	chr7_-_5340026_5343473	ACTB	-	actin, beta
hSQ012541	6908	CACTGAGAACACCGCGCAGCGTGACTGTGAGTTGCTCATACCGTGCTGCTATCTGGGCAGCGCTGCCCAT	PC Details: [Normalization]	chr6_+_170781090_170799578	TBP	GTF2D|GTF2D1|MGC117320|MGC126054|MGC126055|SCA17|TFIID	TATA box binding protein
hSQ021313	3251	CTGTTTATTTGCACTATGAGCCTATAGACTATCAGTTCCCTTTGGGCGGATTGTTGTTTAACTTGTAAAT	PC Details: [Normalization]	chrX_+_133319776_133360216	HPRT1	HGPRT|HPRT	hypoxanthine phosphoribosyltransferase 1 (Lesch-Nyhan syndrome)
hSQ018331	23521	CGGACTCCTGGTCTGAGCCCAATAAAGACTGTTAATTCCTCATGCGTTGCCTGCCCTTCCTCCATTGTTG	PC Details: [Normalization]	chr19_+_54682675_54687374	RPL13A	-	ribosomal protein L13a
hSQ012653	7316	CACTTGGTCCTGCGCTTGAGGGGGGGTGTCTAAGTTTCCCCTTTTAAGGTTTCAACAAATTTCATTGCAC	PC Details: [Normalization]	chr12_-_123921071_123924080	UBC	HMG20	ubiquitin C
hSQ025392	60	GATTGCACATTGTTGTTTTTTTAATAGTCATTCCAAATATGAGATGCATTGTTACAGGAAGTCCCTTGCC	PC Details: [Normalization]	chr7_-_5340026_5343473	ACTB	-	actin, beta
hSQ012541	6908	CACTGAGAACACCGCGCAGCGTGACTGTGAGTTGCTCATACCGTGCTGCTATCTGGGCAGCGCTGCCCAT	PC Details: [Normalization]	chr6_+_170781090_170799578	TBP	GTF2D|GTF2D1|MGC117320|MGC126054|MGC126055|SCA17|TFIID	TATA box binding protein
hSQ021313	3251	CTGTTTATTTGCACTATGAGCCTATAGACTATCAGTTCCCTTTGGGCGGATTGTTGTTTAACTTGTAAAT	PC Details: [Normalization]	chrX_+_133319776_133360216	HPRT1	HGPRT|HPRT	hypoxanthine phosphoribosyltransferase 1 (Lesch-Nyhan syndrome)
hSQ018331	23521	CGGACTCCTGGTCTGAGCCCAATAAAGACTGTTAATTCCTCATGCGTTGCCTGCCCTTCCTCCATTGTTG	PC Details: [Normalization]	chr19_+_54682675_54687374	RPL13A	-	ribosomal protein L13a
hSQ012653	7316	CACTTGGTCCTGCGCTTGAGGGGGGGTGTCTAAGTTTCCCCTTTTAAGGTTTCAACAAATTTCATTGCAC	PC Details: [Normalization]	chr12_-_123921071_123924080	UBC	HMG20	ubiquitin C
hSQ025392	60	GATTGCACATTGTTGTTTTTTTAATAGTCATTCCAAATATGAGATGCATTGTTACAGGAAGTCCCTTGCC	PC Details: [Normalization]	chr7_-_5340026_5343473	ACTB	-	actin, beta
hSQ012541	6908	CACTGAGAACACCGCGCAGCGTGACTGTGAGTTGCTCATACCGTGCTGCTATCTGGGCAGCGCTGCCCAT	PC Details: [Normalization]	chr6_+_170781090_170799578	TBP	GTF2D|GTF2D1|MGC117320|MGC126054|MGC126055|SCA17|TFIID	TATA box binding protein
hSQ021313	3251	CTGTTTATTTGCACTATGAGCCTATAGACTATCAGTTCCCTTTGGGCGGATTGTTGTTTAACTTGTAAAT	PC Details: [Normalization]	chrX_+_133319776_133360216	HPRT1	HGPRT|HPRT	hypoxanthine phosphoribosyltransferase 1 (Lesch-Nyhan syndrome)
hSQ018331	23521	CGGACTCCTGGTCTGAGCCCAATAAAGACTGTTAATTCCTCATGCGTTGCCTGCCCTTCCTCCATTGTTG	PC Details: [Normalization]	chr19_+_54682675_54687374	RPL13A	-	ribosomal protein L13a
hSQ012653	7316	CACTTGGTCCTGCGCTTGAGGGGGGGTGTCTAAGTTTCCCCTTTTAAGGTTTCAACAAATTTCATTGCAC	PC Details: [Normalization]	chr12_-_123921071_123924080	UBC	HMG20	ubiquitin C
hSQ025392	60	GATTGCACATTGTTGTTTTTTTAATAGTCATTCCAAATATGAGATGCATTGTTACAGGAAGTCCCTTGCC	PC Details: [Normalization]	chr7_-_5340026_5343473	ACTB	-	actin, beta
hSQ012541	6908	CACTGAGAACACCGCGCAGCGTGACTGTGAGTTGCTCATACCGTGCTGCTATCTGGGCAGCGCTGCCCAT	PC Details: [Normalization]	chr6_+_170781090_170799578	TBP	GTF2D|GTF2D1|MGC117320|MGC126054|MGC126055|SCA17|TFIID	TATA box binding protein
hSQ021313	3251	CTGTTTATTTGCACTATGAGCCTATAGACTATCAGTTCCCTTTGGGCGGATTGTTGTTTAACTTGTAAAT	PC Details: [Normalization]	chrX_+_133319776_133360216	HPRT1	HGPRT|HPRT	hypoxanthine phosphoribosyltransferase 1 (Lesch-Nyhan syndrome)
hSQ018331	23521	CGGACTCCTGGTCTGAGCCCAATAAAGACTGTTAATTCCTCATGCGTTGCCTGCCCTTCCTCCATTGTTG	PC Details: [Normalization]	chr19_+_54682675_54687374	RPL13A	-	ribosomal protein L13a
hSQ038017	6389	TCCTTTGTGGACGTTGGCACTGGGAAGGTCACTCTGGAATATAGACCCGTAATCGACAAAACTTTGAACG	PC Details: [Normalization]	chr5_-_1625375_1627469	SDHA	FP|SDH2|SDHF	succinate dehydrogenase complex, subunit A, flavoprotein (Fp)
hSQ040268	3145	TGCCCAGCATGAAGATGGCCCTGAGGATGACCCACAGTTGGTAGGCATCACTGCTCGTAACATTCCACGA	PC Details: [Normalization]	chr11_+_118443700_118469468	HMBS	PBG-D|PBGD|UPS	hydroxymethylbilane synthase
hSQ002555	567	AAGTGGGATCGAGACATGTAAGCAGCATCATGGAGGTTTGAAGATGCCGCATTTGGATTGGATGAATTCC	PC Details: [Normalization]	chr15_+_42791008_42797634	B2M	-	beta-2-microglobulin
hSQ004178	2597	ACCAGGTGGTCTCCTCTGACTTCAACAGCGACACCCACTCCTCCACCTTTGACGCTGGGGCTGGCATTGC	PC Details: [Normalization]	chr12_+_6513917_6517798	GAPDH	G3PD|GAPD|MGC88685	glyceraldehyde-3-phosphate dehydrogenase
hSQ021443	7534	CTTATAGCCTGCCTTCAATTTTGATCCTTTATTCTTTCTATTTGTCAGGTGCACAAGATTACCTTCCTGT	PC Details: [Normalization]	chr8_-_102000089_102034745	YWHAZ	KCIP-1|MGC111427|MGC126532|MGC138156	tyrosine 3-monooxygenase/tryptophan 5-monooxygenase activation protein, zeta polypeptide
hSQ038017	6389	TCCTTTGTGGACGTTGGCACTGGGAAGGTCACTCTGGAATATAGACCCGTAATCGACAAAACTTTGAACG	PC Details: [Normalization]	chr5_-_1625375_1627469	SDHA	FP|SDH2|SDHF	succinate dehydrogenase complex, subunit A, flavoprotein (Fp)
hSQ040268	3145	TGCCCAGCATGAAGATGGCCCTGAGGATGACCCACAGTTGGTAGGCATCACTGCTCGTAACATTCCACGA	PC Details: [Normalization]	chr11_+_118443700_118469468	HMBS	PBG-D|PBGD|UPS	hydroxymethylbilane synthase
hSQ002555	567	AAGTGGGATCGAGACATGTAAGCAGCATCATGGAGGTTTGAAGATGCCGCATTTGGATTGGATGAATTCC	PC Details: [Normalization]	chr15_+_42791008_42797634	B2M	-	beta-2-microglobulin
hSQ004178	2597	ACCAGGTGGTCTCCTCTGACTTCAACAGCGACACCCACTCCTCCACCTTTGACGCTGGGGCTGGCATTGC	PC Details: [Normalization]	chr12_+_6513917_6517798	GAPDH	G3PD|GAPD|MGC88685	glyceraldehyde-3-phosphate dehydrogenase
hSQ021443	7534	CTTATAGCCTGCCTTCAATTTTGATCCTTTATTCTTTCTATTTGTCAGGTGCACAAGATTACCTTCCTGT	PC Details: [Normalization]	chr8_-_102000089_102034745	YWHAZ	KCIP-1|MGC111427|MGC126532|MGC138156	tyrosine 3-monooxygenase/tryptophan 5-monooxygenase activation protein, zeta polypeptide
hSQ038017	6389	TCCTTTGTGGACGTTGGCACTGGGAAGGTCACTCTGGAATATAGACCCGTAATCGACAAAACTTTGAACG	PC Details: [Normalization]	chr5_-_1625375_1627469	SDHA	FP|SDH2|SDHF	succinate dehydrogenase complex, subunit A, flavoprotein (Fp)
hSQ040268	3145	TGCCCAGCATGAAGATGGCCCTGAGGATGACCCACAGTTGGTAGGCATCACTGCTCGTAACATTCCACGA	PC Details: [Normalization]	chr11_+_118443700_118469468	HMBS	PBG-D|PBGD|UPS	hydroxymethylbilane synthase
hSQ002555	567	AAGTGGGATCGAGACATGTAAGCAGCATCATGGAGGTTTGAAGATGCCGCATTTGGATTGGATGAATTCC	PC Details: [Normalization]	chr15_+_42791008_42797634	B2M	-	beta-2-microglobulin
hSQ004178	2597	ACCAGGTGGTCTCCTCTGACTTCAACAGCGACACCCACTCCTCCACCTTTGACGCTGGGGCTGGCATTGC	PC Details: [Normalization]	chr12_+_6513917_6517798	GAPDH	G3PD|GAPD|MGC88685	glyceraldehyde-3-phosphate dehydrogenase
hSQ021443	7534	CTTATAGCCTGCCTTCAATTTTGATCCTTTATTCTTTCTATTTGTCAGGTGCACAAGATTACCTTCCTGT	PC Details: [Normalization]	chr8_-_102000089_102034745	YWHAZ	KCIP-1|MGC111427|MGC126532|MGC138156	tyrosine 3-monooxygenase/tryptophan 5-monooxygenase activation protein, zeta polypeptide
hSQ038017	6389	TCCTTTGTGGACGTTGGCACTGGGAAGGTCACTCTGGAATATAGACCCGTAATCGACAAAACTTTGAACG	PC Details: [Normalization]	chr5_-_1625375_1627469	SDHA	FP|SDH2|SDHF	succinate dehydrogenase complex, subunit A, flavoprotein (Fp)
hSQ040268	3145	TGCCCAGCATGAAGATGGCCCTGAGGATGACCCACAGTTGGTAGGCATCACTGCTCGTAACATTCCACGA	PC Details: [Normalization]	chr11_+_118443700_118469468	HMBS	PBG-D|PBGD|UPS	hydroxymethylbilane synthase
hSQ002555	567	AAGTGGGATCGAGACATGTAAGCAGCATCATGGAGGTTTGAAGATGCCGCATTTGGATTGGATGAATTCC	PC Details: [Normalization]	chr15_+_42791008_42797634	B2M	-	beta-2-microglobulin
hSQ004178	2597	ACCAGGTGGTCTCCTCTGACTTCAACAGCGACACCCACTCCTCCACCTTTGACGCTGGGGCTGGCATTGC	PC Details: [Normalization]	chr12_+_6513917_6517798	GAPDH	G3PD|GAPD|MGC88685	glyceraldehyde-3-phosphate dehydrogenase
hSQ021443	7534	CTTATAGCCTGCCTTCAATTTTGATCCTTTATTCTTTCTATTTGTCAGGTGCACAAGATTACCTTCCTGT	PC Details: [Normalization]	chr8_-_102000089_102034745	YWHAZ	KCIP-1|MGC111427|MGC126532|MGC138156	tyrosine 3-monooxygenase/tryptophan 5-monooxygenase activation protein, zeta polypeptide
hSQ038017	6389	TCCTTTGTGGACGTTGGCACTGGGAAGGTCACTCTGGAATATAGACCCGTAATCGACAAAACTTTGAACG	PC Details: [Normalization]	chr5_-_1625375_1627469	SDHA	FP|SDH2|SDHF	succinate dehydrogenase complex, subunit A, flavoprotein (Fp)
hSQ040268	3145	TGCCCAGCATGAAGATGGCCCTGAGGATGACCCACAGTTGGTAGGCATCACTGCTCGTAACATTCCACGA	PC Details: [Normalization]	chr11_+_118443700_118469468	HMBS	PBG-D|PBGD|UPS	hydroxymethylbilane synthase
hSQ002555	567	AAGTGGGATCGAGACATGTAAGCAGCATCATGGAGGTTTGAAGATGCCGCATTTGGATTGGATGAATTCC	PC Details: [Normalization]	chr15_+_42791008_42797634	B2M	-	beta-2-microglobulin
hSQ004178	2597	ACCAGGTGGTCTCCTCTGACTTCAACAGCGACACCCACTCCTCCACCTTTGACGCTGGGGCTGGCATTGC	PC Details: [Normalization]	chr12_+_6513917_6517798	GAPDH	G3PD|GAPD|MGC88685	glyceraldehyde-3-phosphate dehydrogenase
hSQ021313	3251	CTGTTTATTTGCACTATGAGCCTATAGACTATCAGTTCCCTTTGGGCGGATTGTTGTTTAACTTGTAAAT	PC Details: [Normalization]	chrX_+_133319776_133360216	HPRT1	HGPRT|HPRT	hypoxanthine phosphoribosyltransferase 1 (Lesch-Nyhan syndrome)
hSQ018331	23521	CGGACTCCTGGTCTGAGCCCAATAAAGACTGTTAATTCCTCATGCGTTGCCTGCCCTTCCTCCATTGTTG	PC Details: [Normalization]	chr19_+_54682675_54687374	RPL13A	-	ribosomal protein L13a
hSQ012653	7316	CACTTGGTCCTGCGCTTGAGGGGGGGTGTCTAAGTTTCCCCTTTTAAGGTTTCAACAAATTTCATTGCAC	PC Details: [Normalization]	chr12_-_123921071_123924080	UBC	HMG20	ubiquitin C
hSQ025392	60	GATTGCACATTGTTGTTTTTTTAATAGTCATTCCAAATATGAGATGCATTGTTACAGGAAGTCCCTTGCC	PC Details: [Normalization]	chr7_-_5340026_5343473	ACTB	-	actin, beta
hSQ012541	6908	CACTGAGAACACCGCGCAGCGTGACTGTGAGTTGCTCATACCGTGCTGCTATCTGGGCAGCGCTGCCCAT	PC Details: [Normalization]	chr6_+_170781090_170799578	TBP	GTF2D|GTF2D1|MGC117320|MGC126054|MGC126055|SCA17|TFIID	TATA box binding protein
hSQ021313	3251	CTGTTTATTTGCACTATGAGCCTATAGACTATCAGTTCCCTTTGGGCGGATTGTTGTTTAACTTGTAAAT	PC Details: [Normalization]	chrX_+_133319776_133360216	HPRT1	HGPRT|HPRT	hypoxanthine phosphoribosyltransferase 1 (Lesch-Nyhan syndrome)
hSQ018331	23521	CGGACTCCTGGTCTGAGCCCAATAAAGACTGTTAATTCCTCATGCGTTGCCTGCCCTTCCTCCATTGTTG	PC Details: [Normalization]	chr19_+_54682675_54687374	RPL13A	-	ribosomal protein L13a
hSQ012653	7316	CACTTGGTCCTGCGCTTGAGGGGGGGTGTCTAAGTTTCCCCTTTTAAGGTTTCAACAAATTTCATTGCAC	PC Details: [Normalization]	chr12_-_123921071_123924080	UBC	HMG20	ubiquitin C
hSQ025392	60	GATTGCACATTGTTGTTTTTTTAATAGTCATTCCAAATATGAGATGCATTGTTACAGGAAGTCCCTTGCC	PC Details: [Normalization]	chr7_-_5340026_5343473	ACTB	-	actin, beta
hSQ012541	6908	CACTGAGAACACCGCGCAGCGTGACTGTGAGTTGCTCATACCGTGCTGCTATCTGGGCAGCGCTGCCCAT	PC Details: [Normalization]	chr6_+_170781090_170799578	TBP	GTF2D|GTF2D1|MGC117320|MGC126054|MGC126055|SCA17|TFIID	TATA box binding protein
hSQ021313	3251	CTGTTTATTTGCACTATGAGCCTATAGACTATCAGTTCCCTTTGGGCGGATTGTTGTTTAACTTGTAAAT	PC Details: [Normalization]	chrX_+_133319776_133360216	HPRT1	HGPRT|HPRT	hypoxanthine phosphoribosyltransferase 1 (Lesch-Nyhan syndrome)
hSQ018331	23521	CGGACTCCTGGTCTGAGCCCAATAAAGACTGTTAATTCCTCATGCGTTGCCTGCCCTTCCTCCATTGTTG	PC Details: [Normalization]	chr19_+_54682675_54687374	RPL13A	-	ribosomal protein L13a
hSQ012653	7316	CACTTGGTCCTGCGCTTGAGGGGGGGTGTCTAAGTTTCCCCTTTTAAGGTTTCAACAAATTTCATTGCAC	PC Details: [Normalization]	chr12_-_123921071_123924080	UBC	HMG20	ubiquitin C
hSQ025392	60	GATTGCACATTGTTGTTTTTTTAATAGTCATTCCAAATATGAGATGCATTGTTACAGGAAGTCCCTTGCC	PC Details: [Normalization]	chr7_-_5340026_5343473	ACTB	-	actin, beta
hSQ012541	6908	CACTGAGAACACCGCGCAGCGTGACTGTGAGTTGCTCATACCGTGCTGCTATCTGGGCAGCGCTGCCCAT	PC Details: [Normalization]	chr6_+_170781090_170799578	TBP	GTF2D|GTF2D1|MGC117320|MGC126054|MGC126055|SCA17|TFIID	TATA box binding protein
hSQ021313	3251	CTGTTTATTTGCACTATGAGCCTATAGACTATCAGTTCCCTTTGGGCGGATTGTTGTTTAACTTGTAAAT	PC Details: [Normalization]	chrX_+_133319776_133360216	HPRT1	HGPRT|HPRT	hypoxanthine phosphoribosyltransferase 1 (Lesch-Nyhan syndrome)
hSQ018331	23521	CGGACTCCTGGTCTGAGCCCAATAAAGACTGTTAATTCCTCATGCGTTGCCTGCCCTTCCTCCATTGTTG	PC Details: [Normalization]	chr19_+_54682675_54687374	RPL13A	-	ribosomal protein L13a
hSQ012653	7316	CACTTGGTCCTGCGCTTGAGGGGGGGTGTCTAAGTTTCCCCTTTTAAGGTTTCAACAAATTTCATTGCAC	PC Details: [Normalization]	chr12_-_123921071_123924080	UBC	HMG20	ubiquitin C
hSQ025392	60	GATTGCACATTGTTGTTTTTTTAATAGTCATTCCAAATATGAGATGCATTGTTACAGGAAGTCCCTTGCC	PC Details: [Normalization]	chr7_-_5340026_5343473	ACTB	-	actin, beta
hSQ012541	6908	CACTGAGAACACCGCGCAGCGTGACTGTGAGTTGCTCATACCGTGCTGCTATCTGGGCAGCGCTGCCCAT	PC Details: [Normalization]	chr6_+_170781090_170799578	TBP	GTF2D|GTF2D1|MGC117320|MGC126054|MGC126055|SCA17|TFIID	TATA box binding protein
hSQ021313	3251	CTGTTTATTTGCACTATGAGCCTATAGACTATCAGTTCCCTTTGGGCGGATTGTTGTTTAACTTGTAAAT	PC Details: [Normalization]	chrX_+_133319776_133360216	HPRT1	HGPRT|HPRT	hypoxanthine phosphoribosyltransferase 1 (Lesch-Nyhan syndrome)
hSQ018331	23521	CGGACTCCTGGTCTGAGCCCAATAAAGACTGTTAATTCCTCATGCGTTGCCTGCCCTTCCTCCATTGTTG	PC Details: [Normalization]	chr19_+_54682675_54687374	RPL13A	-	ribosomal protein L13a
hSQ012653	7316	CACTTGGTCCTGCGCTTGAGGGGGGGTGTCTAAGTTTCCCCTTTTAAGGTTTCAACAAATTTCATTGCAC	PC Details: [Normalization]	chr12_-_123921071_123924080	UBC	HMG20	ubiquitin C
hSQ025392	60	GATTGCACATTGTTGTTTTTTTAATAGTCATTCCAAATATGAGATGCATTGTTACAGGAAGTCCCTTGCC	PC Details: [Normalization]	chr7_-_5340026_5343473	ACTB	-	actin, beta
hSQ002555	567	AAGTGGGATCGAGACATGTAAGCAGCATCATGGAGGTTTGAAGATGCCGCATTTGGATTGGATGAATTCC	PC Details: [Normalization]	chr15_+_42791008_42797634	B2M	-	beta-2-microglobulin
hSQ004178	2597	ACCAGGTGGTCTCCTCTGACTTCAACAGCGACACCCACTCCTCCACCTTTGACGCTGGGGCTGGCATTGC	PC Details: [Normalization]	chr12_+_6513917_6517798	GAPDH	G3PD|GAPD|MGC88685	glyceraldehyde-3-phosphate dehydrogenase
hSQ021443	7534	CTTATAGCCTGCCTTCAATTTTGATCCTTTATTCTTTCTATTTGTCAGGTGCACAAGATTACCTTCCTGT	PC Details: [Normalization]	chr8_-_102000089_102034745	YWHAZ	KCIP-1|MGC111427|MGC126532|MGC138156	tyrosine 3-monooxygenase/tryptophan 5-monooxygenase activation protein, zeta polypeptide
hSQ038017	6389	TCCTTTGTGGACGTTGGCACTGGGAAGGTCACTCTGGAATATAGACCCGTAATCGACAAAACTTTGAACG	PC Details: [Normalization]	chr5_-_1625375_1627469	SDHA	FP|SDH2|SDHF	succinate dehydrogenase complex, subunit A, flavoprotein (Fp)
hSQ040268	3145	TGCCCAGCATGAAGATGGCCCTGAGGATGACCCACAGTTGGTAGGCATCACTGCTCGTAACATTCCACGA	PC Details: [Normalization]	chr11_+_118443700_118469468	HMBS	PBG-D|PBGD|UPS	hydroxymethylbilane synthase
hSQ002555	567	AAGTGGGATCGAGACATGTAAGCAGCATCATGGAGGTTTGAAGATGCCGCATTTGGATTGGATGAATTCC	PC Details: [Normalization]	chr15_+_42791008_42797634	B2M	-	beta-2-microglobulin
hSQ004178	2597	ACCAGGTGGTCTCCTCTGACTTCAACAGCGACACCCACTCCTCCACCTTTGACGCTGGGGCTGGCATTGC	PC Details: [Normalization]	chr12_+_6513917_6517798	GAPDH	G3PD|GAPD|MGC88685	glyceraldehyde-3-phosphate dehydrogenase
hSQ021443	7534	CTTATAGCCTGCCTTCAATTTTGATCCTTTATTCTTTCTATTTGTCAGGTGCACAAGATTACCTTCCTGT	PC Details: [Normalization]	chr8_-_102000089_102034745	YWHAZ	KCIP-1|MGC111427|MGC126532|MGC138156	tyrosine 3-monooxygenase/tryptophan 5-monooxygenase activation protein, zeta polypeptide
hSQ038017	6389	TCCTTTGTGGACGTTGGCACTGGGAAGGTCACTCTGGAATATAGACCCGTAATCGACAAAACTTTGAACG	PC Details: [Normalization]	chr5_-_1625375_1627469	SDHA	FP|SDH2|SDHF	succinate dehydrogenase complex, subunit A, flavoprotein (Fp)
hSQ040268	3145	TGCCCAGCATGAAGATGGCCCTGAGGATGACCCACAGTTGGTAGGCATCACTGCTCGTAACATTCCACGA	PC Details: [Normalization]	chr11_+_118443700_118469468	HMBS	PBG-D|PBGD|UPS	hydroxymethylbilane synthase
hSQ002555	567	AAGTGGGATCGAGACATGTAAGCAGCATCATGGAGGTTTGAAGATGCCGCATTTGGATTGGATGAATTCC	PC Details: [Normalization]	chr15_+_42791008_42797634	B2M	-	beta-2-microglobulin
hSQ004178	2597	ACCAGGTGGTCTCCTCTGACTTCAACAGCGACACCCACTCCTCCACCTTTGACGCTGGGGCTGGCATTGC	PC Details: [Normalization]	chr12_+_6513917_6517798	GAPDH	G3PD|GAPD|MGC88685	glyceraldehyde-3-phosphate dehydrogenase
hSQ021443	7534	CTTATAGCCTGCCTTCAATTTTGATCCTTTATTCTTTCTATTTGTCAGGTGCACAAGATTACCTTCCTGT	PC Details: [Normalization]	chr8_-_102000089_102034745	YWHAZ	KCIP-1|MGC111427|MGC126532|MGC138156	tyrosine 3-monooxygenase/tryptophan 5-monooxygenase activation protein, zeta polypeptide
hSQ038017	6389	TCCTTTGTGGACGTTGGCACTGGGAAGGTCACTCTGGAATATAGACCCGTAATCGACAAAACTTTGAACG	PC Details: [Normalization]	chr5_-_1625375_1627469	SDHA	FP|SDH2|SDHF	succinate dehydrogenase complex, subunit A, flavoprotein (Fp)
hSQ040268	3145	TGCCCAGCATGAAGATGGCCCTGAGGATGACCCACAGTTGGTAGGCATCACTGCTCGTAACATTCCACGA	PC Details: [Normalization]	chr11_+_118443700_118469468	HMBS	PBG-D|PBGD|UPS	hydroxymethylbilane synthase
hSQ002555	567	AAGTGGGATCGAGACATGTAAGCAGCATCATGGAGGTTTGAAGATGCCGCATTTGGATTGGATGAATTCC	PC Details: [Normalization]	chr15_+_42791008_42797634	B2M	-	beta-2-microglobulin
hSQ004178	2597	ACCAGGTGGTCTCCTCTGACTTCAACAGCGACACCCACTCCTCCACCTTTGACGCTGGGGCTGGCATTGC	PC Details: [Normalization]	chr12_+_6513917_6517798	GAPDH	G3PD|GAPD|MGC88685	glyceraldehyde-3-phosphate dehydrogenase
hSQ021443	7534	CTTATAGCCTGCCTTCAATTTTGATCCTTTATTCTTTCTATTTGTCAGGTGCACAAGATTACCTTCCTGT	PC Details: [Normalization]	chr8_-_102000089_102034745	YWHAZ	KCIP-1|MGC111427|MGC126532|MGC138156	tyrosine 3-monooxygenase/tryptophan 5-monooxygenase activation protein, zeta polypeptide
hSQ038017	6389	TCCTTTGTGGACGTTGGCACTGGGAAGGTCACTCTGGAATATAGACCCGTAATCGACAAAACTTTGAACG	PC Details: [Normalization]	chr5_-_1625375_1627469	SDHA	FP|SDH2|SDHF	succinate dehydrogenase complex, subunit A, flavoprotein (Fp)
hSQ040268	3145	TGCCCAGCATGAAGATGGCCCTGAGGATGACCCACAGTTGGTAGGCATCACTGCTCGTAACATTCCACGA	PC Details: [Normalization]	chr11_+_118443700_118469468	HMBS	PBG-D|PBGD|UPS	hydroxymethylbilane synthase
hSQ002555	567	AAGTGGGATCGAGACATGTAAGCAGCATCATGGAGGTTTGAAGATGCCGCATTTGGATTGGATGAATTCC	PC Details: [Normalization]	chr15_+_42791008_42797634	B2M	-	beta-2-microglobulin
hSQ004178	2597	ACCAGGTGGTCTCCTCTGACTTCAACAGCGACACCCACTCCTCCACCTTTGACGCTGGGGCTGGCATTGC	PC Details: [Normalization]	chr12_+_6513917_6517798	GAPDH	G3PD|GAPD|MGC88685	glyceraldehyde-3-phosphate dehydrogenase
hSQ021443	7534	CTTATAGCCTGCCTTCAATTTTGATCCTTTATTCTTTCTATTTGTCAGGTGCACAAGATTACCTTCCTGT	PC Details: [Normalization]	chr8_-_102000089_102034745	YWHAZ	KCIP-1|MGC111427|MGC126532|MGC138156	tyrosine 3-monooxygenase/tryptophan 5-monooxygenase activation protein, zeta polypeptide
hSQ038017	6389	TCCTTTGTGGACGTTGGCACTGGGAAGGTCACTCTGGAATATAGACCCGTAATCGACAAAACTTTGAACG	PC Details: [Normalization]	chr5_-_1625375_1627469	SDHA	FP|SDH2|SDHF	succinate dehydrogenase complex, subunit A, flavoprotein (Fp)
hSQ012653	7316	CACTTGGTCCTGCGCTTGAGGGGGGGTGTCTAAGTTTCCCCTTTTAAGGTTTCAACAAATTTCATTGCAC	PC Details: [Normalization]	chr12_-_123921071_123924080	UBC	HMG20	ubiquitin C
hSQ025392	60	GATTGCACATTGTTGTTTTTTTAATAGTCATTCCAAATATGAGATGCATTGTTACAGGAAGTCCCTTGCC	PC Details: [Normalization]	chr7_-_5340026_5343473	ACTB	-	actin, beta
hSQ012541	6908	CACTGAGAACACCGCGCAGCGTGACTGTGAGTTGCTCATACCGTGCTGCTATCTGGGCAGCGCTGCCCAT	PC Details: [Normalization]	chr6_+_170781090_170799578	TBP	GTF2D|GTF2D1|MGC117320|MGC126054|MGC126055|SCA17|TFIID	TATA box binding protein
hSQ021313	3251	CTGTTTATTTGCACTATGAGCCTATAGACTATCAGTTCCCTTTGGGCGGATTGTTGTTTAACTTGTAAAT	PC Details: [Normalization]	chrX_+_133319776_133360216	HPRT1	HGPRT|HPRT	hypoxanthine phosphoribosyltransferase 1 (Lesch-Nyhan syndrome)
hSQ018331	23521	CGGACTCCTGGTCTGAGCCCAATAAAGACTGTTAATTCCTCATGCGTTGCCTGCCCTTCCTCCATTGTTG	PC Details: [Normalization]	chr19_+_54682675_54687374	RPL13A	-	ribosomal protein L13a
hSQ012653	7316	CACTTGGTCCTGCGCTTGAGGGGGGGTGTCTAAGTTTCCCCTTTTAAGGTTTCAACAAATTTCATTGCAC	PC Details: [Normalization]	chr12_-_123921071_123924080	UBC	HMG20	ubiquitin C
hSQ025392	60	GATTGCACATTGTTGTTTTTTTAATAGTCATTCCAAATATGAGATGCATTGTTACAGGAAGTCCCTTGCC	PC Details: [Normalization]	chr7_-_5340026_5343473	ACTB	-	actin, beta
hSQ012541	6908	CACTGAGAACACCGCGCAGCGTGACTGTGAGTTGCTCATACCGTGCTGCTATCTGGGCAGCGCTGCCCAT	PC Details: [Normalization]	chr6_+_170781090_170799578	TBP	GTF2D|GTF2D1|MGC117320|MGC126054|MGC126055|SCA17|TFIID	TATA box binding protein
hSQ021313	3251	CTGTTTATTTGCACTATGAGCCTATAGACTATCAGTTCCCTTTGGGCGGATTGTTGTTTAACTTGTAAAT	PC Details: [Normalization]	chrX_+_133319776_133360216	HPRT1	HGPRT|HPRT	hypoxanthine phosphoribosyltransferase 1 (Lesch-Nyhan syndrome)
hSQ018331	23521	CGGACTCCTGGTCTGAGCCCAATAAAGACTGTTAATTCCTCATGCGTTGCCTGCCCTTCCTCCATTGTTG	PC Details: [Normalization]	chr19_+_54682675_54687374	RPL13A	-	ribosomal protein L13a
hSQ012653	7316	CACTTGGTCCTGCGCTTGAGGGGGGGTGTCTAAGTTTCCCCTTTTAAGGTTTCAACAAATTTCATTGCAC	PC Details: [Normalization]	chr12_-_123921071_123924080	UBC	HMG20	ubiquitin C
hSQ025392	60	GATTGCACATTGTTGTTTTTTTAATAGTCATTCCAAATATGAGATGCATTGTTACAGGAAGTCCCTTGCC	PC Details: [Normalization]	chr7_-_5340026_5343473	ACTB	-	actin, beta
hSQ012541	6908	CACTGAGAACACCGCGCAGCGTGACTGTGAGTTGCTCATACCGTGCTGCTATCTGGGCAGCGCTGCCCAT	PC Details: [Normalization]	chr6_+_170781090_170799578	TBP	GTF2D|GTF2D1|MGC117320|MGC126054|MGC126055|SCA17|TFIID	TATA box binding protein
hSQ021313	3251	CTGTTTATTTGCACTATGAGCCTATAGACTATCAGTTCCCTTTGGGCGGATTGTTGTTTAACTTGTAAAT	PC Details: [Normalization]	chrX_+_133319776_133360216	HPRT1	HGPRT|HPRT	hypoxanthine phosphoribosyltransferase 1 (Lesch-Nyhan syndrome)
hSQ018331	23521	CGGACTCCTGGTCTGAGCCCAATAAAGACTGTTAATTCCTCATGCGTTGCCTGCCCTTCCTCCATTGTTG	PC Details: [Normalization]	chr19_+_54682675_54687374	RPL13A	-	ribosomal protein L13a
hSQ012653	7316	CACTTGGTCCTGCGCTTGAGGGGGGGTGTCTAAGTTTCCCCTTTTAAGGTTTCAACAAATTTCATTGCAC	PC Details: [Normalization]	chr12_-_123921071_123924080	UBC	HMG20	ubiquitin C
hSQ025392	60	GATTGCACATTGTTGTTTTTTTAATAGTCATTCCAAATATGAGATGCATTGTTACAGGAAGTCCCTTGCC	PC Details: [Normalization]	chr7_-_5340026_5343473	ACTB	-	actin, beta
hSQ012541	6908	CACTGAGAACACCGCGCAGCGTGACTGTGAGTTGCTCATACCGTGCTGCTATCTGGGCAGCGCTGCCCAT	PC Details: [Normalization]	chr6_+_170781090_170799578	TBP	GTF2D|GTF2D1|MGC117320|MGC126054|MGC126055|SCA17|TFIID	TATA box binding protein
hSQ021313	3251	CTGTTTATTTGCACTATGAGCCTATAGACTATCAGTTCCCTTTGGGCGGATTGTTGTTTAACTTGTAAAT	PC Details: [Normalization]	chrX_+_133319776_133360216	HPRT1	HGPRT|HPRT	hypoxanthine phosphoribosyltransferase 1 (Lesch-Nyhan syndrome)
hSQ018331	23521	CGGACTCCTGGTCTGAGCCCAATAAAGACTGTTAATTCCTCATGCGTTGCCTGCCCTTCCTCCATTGTTG	PC Details: [Normalization]	chr19_+_54682675_54687374	RPL13A	-	ribosomal protein L13a
hSQ012653	7316	CACTTGGTCCTGCGCTTGAGGGGGGGTGTCTAAGTTTCCCCTTTTAAGGTTTCAACAAATTTCATTGCAC	PC Details: [Normalization]	chr12_-_123921071_123924080	UBC	HMG20	ubiquitin C
hSQ025392	60	GATTGCACATTGTTGTTTTTTTAATAGTCATTCCAAATATGAGATGCATTGTTACAGGAAGTCCCTTGCC	PC Details: [Normalization]	chr7_-_5340026_5343473	ACTB	-	actin, beta
hSQ012541	6908	CACTGAGAACACCGCGCAGCGTGACTGTGAGTTGCTCATACCGTGCTGCTATCTGGGCAGCGCTGCCCAT	PC Details: [Normalization]	chr6_+_170781090_170799578	TBP	GTF2D|GTF2D1|MGC117320|MGC126054|MGC126055|SCA17|TFIID	TATA box binding protein
hSQ021313	3251	CTGTTTATTTGCACTATGAGCCTATAGACTATCAGTTCCCTTTGGGCGGATTGTTGTTTAACTTGTAAAT	PC Details: [Normalization]	chrX_+_133319776_133360216	HPRT1	HGPRT|HPRT	hypoxanthine phosphoribosyltransferase 1 (Lesch-Nyhan syndrome)
hSQ021443	7534	CTTATAGCCTGCCTTCAATTTTGATCCTTTATTCTTTCTATTTGTCAGGTGCACAAGATTACCTTCCTGT	PC Details: [Normalization]	chr8_-_102000089_102034745	YWHAZ	KCIP-1|MGC111427|MGC126532|MGC138156	tyrosine 3-monooxygenase/tryptophan 5-monooxygenase activation protein, zeta polypeptide
hSQ038017	6389	TCCTTTGTGGACGTTGGCACTGGGAAGGTCACTCTGGAATATAGACCCGTAATCGACAAAACTTTGAACG	PC Details: [Normalization]	chr5_-_1625375_1627469	SDHA	FP|SDH2|SDHF	succinate dehydrogenase complex, subunit A, flavoprotein (Fp)
hSQ040268	3145	TGCCCAGCATGAAGATGGCCCTGAGGATGACCCACAGTTGGTAGGCATCACTGCTCGTAACATTCCACGA	PC Details: [Normalization]	chr11_+_118443700_118469468	HMBS	PBG-D|PBGD|UPS	hydroxymethylbilane synthase
hSQ002555	567	AAGTGGGATCGAGACATGTAAGCAGCATCATGGAGGTTTGAAGATGCCGCATTTGGATTGGATGAATTCC	PC Details: [Normalization]	chr15_+_42791008_42797634	B2M	-	beta-2-microglobulin
hSQ004178	2597	ACCAGGTGGTCTCCTCTGACTTCAACAGCGACACCCACTCCTCCACCTTTGACGCTGGGGCTGGCATTGC	PC Details: [Normalization]	chr12_+_6513917_6517798	GAPDH	G3PD|GAPD|MGC88685	glyceraldehyde-3-phosphate dehydrogenase
hSQ021443	7534	CTTATAGCCTGCCTTCAATTTTGATCCTTTATTCTTTCTATTTGTCAGGTGCACAAGATTACCTTCCTGT	PC Details: [Normalization]	chr8_-_102000089_102034745	YWHAZ	KCIP-1|MGC111427|MGC126532|MGC138156	tyrosine 3-monooxygenase/tryptophan 5-monooxygenase activation protein, zeta polypeptide
hSQ038017	6389	TCCTTTGTGGACGTTGGCACTGGGAAGGTCACTCTGGAATATAGACCCGTAATCGACAAAACTTTGAACG	PC Details: [Normalization]	chr5_-_1625375_1627469	SDHA	FP|SDH2|SDHF	succinate dehydrogenase complex, subunit A, flavoprotein (Fp)
hSQ040268	3145	TGCCCAGCATGAAGATGGCCCTGAGGATGACCCACAGTTGGTAGGCATCACTGCTCGTAACATTCCACGA	PC Details: [Normalization]	chr11_+_118443700_118469468	HMBS	PBG-D|PBGD|UPS	hydroxymethylbilane synthase
hSQ002555	567	AAGTGGGATCGAGACATGTAAGCAGCATCATGGAGGTTTGAAGATGCCGCATTTGGATTGGATGAATTCC	PC Details: [Normalization]	chr15_+_42791008_42797634	B2M	-	beta-2-microglobulin
hSQ004178	2597	ACCAGGTGGTCTCCTCTGACTTCAACAGCGACACCCACTCCTCCACCTTTGACGCTGGGGCTGGCATTGC	PC Details: [Normalization]	chr12_+_6513917_6517798	GAPDH	G3PD|GAPD|MGC88685	glyceraldehyde-3-phosphate dehydrogenase
hSQ021443	7534	CTTATAGCCTGCCTTCAATTTTGATCCTTTATTCTTTCTATTTGTCAGGTGCACAAGATTACCTTCCTGT	PC Details: [Normalization]	chr8_-_102000089_102034745	YWHAZ	KCIP-1|MGC111427|MGC126532|MGC138156	tyrosine 3-monooxygenase/tryptophan 5-monooxygenase activation protein, zeta polypeptide
hSQ038017	6389	TCCTTTGTGGACGTTGGCACTGGGAAGGTCACTCTGGAATATAGACCCGTAATCGACAAAACTTTGAACG	PC Details: [Normalization]	chr5_-_1625375_1627469	SDHA	FP|SDH2|SDHF	succinate dehydrogenase complex, subunit A, flavoprotein (Fp)
hSQ040268	3145	TGCCCAGCATGAAGATGGCCCTGAGGATGACCCACAGTTGGTAGGCATCACTGCTCGTAACATTCCACGA	PC Details: [Normalization]	chr11_+_118443700_118469468	HMBS	PBG-D|PBGD|UPS	hydroxymethylbilane synthase
hSQ002555	567	AAGTGGGATCGAGACATGTAAGCAGCATCATGGAGGTTTGAAGATGCCGCATTTGGATTGGATGAATTCC	PC Details: [Normalization]	chr15_+_42791008_42797634	B2M	-	beta-2-microglobulin
hSQ004178	2597	ACCAGGTGGTCTCCTCTGACTTCAACAGCGACACCCACTCCTCCACCTTTGACGCTGGGGCTGGCATTGC	PC Details: [Normalization]	chr12_+_6513917_6517798	GAPDH	G3PD|GAPD|MGC88685	glyceraldehyde-3-phosphate dehydrogenase
hSQ021443	7534	CTTATAGCCTGCCTTCAATTTTGATCCTTTATTCTTTCTATTTGTCAGGTGCACAAGATTACCTTCCTGT	PC Details: [Normalization]	chr8_-_102000089_102034745	YWHAZ	KCIP-1|MGC111427|MGC126532|MGC138156	tyrosine 3-monooxygenase/tryptophan 5-monooxygenase activation protein, zeta polypeptide
hSQ038017	6389	TCCTTTGTGGACGTTGGCACTGGGAAGGTCACTCTGGAATATAGACCCGTAATCGACAAAACTTTGAACG	PC Details: [Normalization]	chr5_-_1625375_1627469	SDHA	FP|SDH2|SDHF	succinate dehydrogenase complex, subunit A, flavoprotein (Fp)
hSQ040268	3145	TGCCCAGCATGAAGATGGCCCTGAGGATGACCCACAGTTGGTAGGCATCACTGCTCGTAACATTCCACGA	PC Details: [Normalization]	chr11_+_118443700_118469468	HMBS	PBG-D|PBGD|UPS	hydroxymethylbilane synthase
hSQ002555	567	AAGTGGGATCGAGACATGTAAGCAGCATCATGGAGGTTTGAAGATGCCGCATTTGGATTGGATGAATTCC	PC Details: [Normalization]	chr15_+_42791008_42797634	B2M	-	beta-2-microglobulin
hSQ004178	2597	ACCAGGTGGTCTCCTCTGACTTCAACAGCGACACCCACTCCTCCACCTTTGACGCTGGGGCTGGCATTGC	PC Details: [Normalization]	chr12_+_6513917_6517798	GAPDH	G3PD|GAPD|MGC88685	glyceraldehyde-3-phosphate dehydrogenase
hSQ021443	7534	CTTATAGCCTGCCTTCAATTTTGATCCTTTATTCTTTCTATTTGTCAGGTGCACAAGATTACCTTCCTGT	PC Details: [Normalization]	chr8_-_102000089_102034745	YWHAZ	KCIP-1|MGC111427|MGC126532|MGC138156	tyrosine 3-monooxygenase/tryptophan 5-monooxygenase activation protein, zeta polypeptide
hSQ038017	6389	TCCTTTGTGGACGTTGGCACTGGGAAGGTCACTCTGGAATATAGACCCGTAATCGACAAAACTTTGAACG	PC Details: [Normalization]	chr5_-_1625375_1627469	SDHA	FP|SDH2|SDHF	succinate dehydrogenase complex, subunit A, flavoprotein (Fp)
hSQ040268	3145	TGCCCAGCATGAAGATGGCCCTGAGGATGACCCACAGTTGGTAGGCATCACTGCTCGTAACATTCCACGA	PC Details: [Normalization]	chr11_+_118443700_118469468	HMBS	PBG-D|PBGD|UPS	hydroxymethylbilane synthase
hSQ002555	567	AAGTGGGATCGAGACATGTAAGCAGCATCATGGAGGTTTGAAGATGCCGCATTTGGATTGGATGAATTCC	PC Details: [Normalization]	chr15_+_42791008_42797634	B2M	-	beta-2-microglobulin
hSQ012541	6908	CACTGAGAACACCGCGCAGCGTGACTGTGAGTTGCTCATACCGTGCTGCTATCTGGGCAGCGCTGCCCAT	PC Details: [Normalization]	chr6_+_170781090_170799578	TBP	GTF2D|GTF2D1|MGC117320|MGC126054|MGC126055|SCA17|TFIID	TATA box binding protein
hSQ021313	3251	CTGTTTATTTGCACTATGAGCCTATAGACTATCAGTTCCCTTTGGGCGGATTGTTGTTTAACTTGTAAAT	PC Details: [Normalization]	chrX_+_133319776_133360216	HPRT1	HGPRT|HPRT	hypoxanthine phosphoribosyltransferase 1 (Lesch-Nyhan syndrome)
hSQ018331	23521	CGGACTCCTGGTCTGAGCCCAATAAAGACTGTTAATTCCTCATGCGTTGCCTGCCCTTCCTCCATTGTTG	PC Details: [Normalization]	chr19_+_54682675_54687374	RPL13A	-	ribosomal protein L13a
hSQ012653	7316	CACTTGGTCCTGCGCTTGAGGGGGGGTGTCTAAGTTTCCCCTTTTAAGGTTTCAACAAATTTCATTGCAC	PC Details: [Normalization]	chr12_-_123921071_123924080	UBC	HMG20	ubiquitin C
hSQ025392	60	GATTGCACATTGTTGTTTTTTTAATAGTCATTCCAAATATGAGATGCATTGTTACAGGAAGTCCCTTGCC	PC Details: [Normalization]	chr7_-_5340026_5343473	ACTB	-	actin, beta
hSQ012541	6908	CACTGAGAACACCGCGCAGCGTGACTGTGAGTTGCTCATACCGTGCTGCTATCTGGGCAGCGCTGCCCAT	PC Details: [Normalization]	chr6_+_170781090_170799578	TBP	GTF2D|GTF2D1|MGC117320|MGC126054|MGC126055|SCA17|TFIID	TATA box binding protein
hSQ021313	3251	CTGTTTATTTGCACTATGAGCCTATAGACTATCAGTTCCCTTTGGGCGGATTGTTGTTTAACTTGTAAAT	PC Details: [Normalization]	chrX_+_133319776_133360216	HPRT1	HGPRT|HPRT	hypoxanthine phosphoribosyltransferase 1 (Lesch-Nyhan syndrome)
hSQ018331	23521	CGGACTCCTGGTCTGAGCCCAATAAAGACTGTTAATTCCTCATGCGTTGCCTGCCCTTCCTCCATTGTTG	PC Details: [Normalization]	chr19_+_54682675_54687374	RPL13A	-	ribosomal protein L13a
hSQ012653	7316	CACTTGGTCCTGCGCTTGAGGGGGGGTGTCTAAGTTTCCCCTTTTAAGGTTTCAACAAATTTCATTGCAC	PC Details: [Normalization]	chr12_-_123921071_123924080	UBC	HMG20	ubiquitin C
hSQ025392	60	GATTGCACATTGTTGTTTTTTTAATAGTCATTCCAAATATGAGATGCATTGTTACAGGAAGTCCCTTGCC	PC Details: [Normalization]	chr7_-_5340026_5343473	ACTB	-	actin, beta
hSQ012541	6908	CACTGAGAACACCGCGCAGCGTGACTGTGAGTTGCTCATACCGTGCTGCTATCTGGGCAGCGCTGCCCAT	PC Details: [Normalization]	chr6_+_170781090_170799578	TBP	GTF2D|GTF2D1|MGC117320|MGC126054|MGC126055|SCA17|TFIID	TATA box binding protein
hSQ021313	3251	CTGTTTATTTGCACTATGAGCCTATAGACTATCAGTTCCCTTTGGGCGGATTGTTGTTTAACTTGTAAAT	PC Details: [Normalization]	chrX_+_133319776_133360216	HPRT1	HGPRT|HPRT	hypoxanthine phosphoribosyltransferase 1 (Lesch-Nyhan syndrome)
hSQ018331	23521	CGGACTCCTGGTCTGAGCCCAATAAAGACTGTTAATTCCTCATGCGTTGCCTGCCCTTCCTCCATTGTTG	PC Details: [Normalization]	chr19_+_54682675_54687374	RPL13A	-	ribosomal protein L13a
hSQ012653	7316	CACTTGGTCCTGCGCTTGAGGGGGGGTGTCTAAGTTTCCCCTTTTAAGGTTTCAACAAATTTCATTGCAC	PC Details: [Normalization]	chr12_-_123921071_123924080	UBC	HMG20	ubiquitin C
hSQ025392	60	GATTGCACATTGTTGTTTTTTTAATAGTCATTCCAAATATGAGATGCATTGTTACAGGAAGTCCCTTGCC	PC Details: [Normalization]	chr7_-_5340026_5343473	ACTB	-	actin, beta
hSQ012541	6908	CACTGAGAACACCGCGCAGCGTGACTGTGAGTTGCTCATACCGTGCTGCTATCTGGGCAGCGCTGCCCAT	PC Details: [Normalization]	chr6_+_170781090_170799578	TBP	GTF2D|GTF2D1|MGC117320|MGC126054|MGC126055|SCA17|TFIID	TATA box binding protein
hSQ021313	3251	CTGTTTATTTGCACTATGAGCCTATAGACTATCAGTTCCCTTTGGGCGGATTGTTGTTTAACTTGTAAAT	PC Details: [Normalization]	chrX_+_133319776_133360216	HPRT1	HGPRT|HPRT	hypoxanthine phosphoribosyltransferase 1 (Lesch-Nyhan syndrome)
hSQ018331	23521	CGGACTCCTGGTCTGAGCCCAATAAAGACTGTTAATTCCTCATGCGTTGCCTGCCCTTCCTCCATTGTTG	PC Details: [Normalization]	chr19_+_54682675_54687374	RPL13A	-	ribosomal protein L13a
hSQ012653	7316	CACTTGGTCCTGCGCTTGAGGGGGGGTGTCTAAGTTTCCCCTTTTAAGGTTTCAACAAATTTCATTGCAC	PC Details: [Normalization]	chr12_-_123921071_123924080	UBC	HMG20	ubiquitin C
hSQ025392	60	GATTGCACATTGTTGTTTTTTTAATAGTCATTCCAAATATGAGATGCATTGTTACAGGAAGTCCCTTGCC	PC Details: [Normalization]	chr7_-_5340026_5343473	ACTB	-	actin, beta
hSQ012541	6908	CACTGAGAACACCGCGCAGCGTGACTGTGAGTTGCTCATACCGTGCTGCTATCTGGGCAGCGCTGCCCAT	PC Details: [Normalization]	chr6_+_170781090_170799578	TBP	GTF2D|GTF2D1|MGC117320|MGC126054|MGC126055|SCA17|TFIID	TATA box binding protein
hSQ021313	3251	CTGTTTATTTGCACTATGAGCCTATAGACTATCAGTTCCCTTTGGGCGGATTGTTGTTTAACTTGTAAAT	PC Details: [Normalization]	chrX_+_133319776_133360216	HPRT1	HGPRT|HPRT	hypoxanthine phosphoribosyltransferase 1 (Lesch-Nyhan syndrome)
hSQ018331	23521	CGGACTCCTGGTCTGAGCCCAATAAAGACTGTTAATTCCTCATGCGTTGCCTGCCCTTCCTCCATTGTTG	PC Details: [Normalization]	chr19_+_54682675_54687374	RPL13A	-	ribosomal protein L13a
hSQ012653	7316	CACTTGGTCCTGCGCTTGAGGGGGGGTGTCTAAGTTTCCCCTTTTAAGGTTTCAACAAATTTCATTGCAC	PC Details: [Normalization]	chr12_-_123921071_123924080	UBC	HMG20	ubiquitin C
hSQ040268	3145	TGCCCAGCATGAAGATGGCCCTGAGGATGACCCACAGTTGGTAGGCATCACTGCTCGTAACATTCCACGA	PC Details: [Normalization]	chr11_+_118443700_118469468	HMBS	PBG-D|PBGD|UPS	hydroxymethylbilane synthase
hSQ002555	567	AAGTGGGATCGAGACATGTAAGCAGCATCATGGAGGTTTGAAGATGCCGCATTTGGATTGGATGAATTCC	PC Details: [Normalization]	chr15_+_42791008_42797634	B2M	-	beta-2-microglobulin
hSQ004178	2597	ACCAGGTGGTCTCCTCTGACTTCAACAGCGACACCCACTCCTCCACCTTTGACGCTGGGGCTGGCATTGC	PC Details: [Normalization]	chr12_+_6513917_6517798	GAPDH	G3PD|GAPD|MGC88685	glyceraldehyde-3-phosphate dehydrogenase
hSQ021443	7534	CTTATAGCCTGCCTTCAATTTTGATCCTTTATTCTTTCTATTTGTCAGGTGCACAAGATTACCTTCCTGT	PC Details: [Normalization]	chr8_-_102000089_102034745	YWHAZ	KCIP-1|MGC111427|MGC126532|MGC138156	tyrosine 3-monooxygenase/tryptophan 5-monooxygenase activation protein, zeta polypeptide
hSQ038017	6389	TCCTTTGTGGACGTTGGCACTGGGAAGGTCACTCTGGAATATAGACCCGTAATCGACAAAACTTTGAACG	PC Details: [Normalization]	chr5_-_1625375_1627469	SDHA	FP|SDH2|SDHF	succinate dehydrogenase complex, subunit A, flavoprotein (Fp)
hSQ040268	3145	TGCCCAGCATGAAGATGGCCCTGAGGATGACCCACAGTTGGTAGGCATCACTGCTCGTAACATTCCACGA	PC Details: [Normalization]	chr11_+_118443700_118469468	HMBS	PBG-D|PBGD|UPS	hydroxymethylbilane synthase
hSQ002555	567	AAGTGGGATCGAGACATGTAAGCAGCATCATGGAGGTTTGAAGATGCCGCATTTGGATTGGATGAATTCC	PC Details: [Normalization]	chr15_+_42791008_42797634	B2M	-	beta-2-microglobulin
hSQ004178	2597	ACCAGGTGGTCTCCTCTGACTTCAACAGCGACACCCACTCCTCCACCTTTGACGCTGGGGCTGGCATTGC	PC Details: [Normalization]	chr12_+_6513917_6517798	GAPDH	G3PD|GAPD|MGC88685	glyceraldehyde-3-phosphate dehydrogenase
hSQ021443	7534	CTTATAGCCTGCCTTCAATTTTGATCCTTTATTCTTTCTATTTGTCAGGTGCACAAGATTACCTTCCTGT	PC Details: [Normalization]	chr8_-_102000089_102034745	YWHAZ	KCIP-1|MGC111427|MGC126532|MGC138156	tyrosine 3-monooxygenase/tryptophan 5-monooxygenase activation protein, zeta polypeptide
hSQ038017	6389	TCCTTTGTGGACGTTGGCACTGGGAAGGTCACTCTGGAATATAGACCCGTAATCGACAAAACTTTGAACG	PC Details: [Normalization]	chr5_-_1625375_1627469	SDHA	FP|SDH2|SDHF	succinate dehydrogenase complex, subunit A, flavoprotein (Fp)
hSQ040268	3145	TGCCCAGCATGAAGATGGCCCTGAGGATGACCCACAGTTGGTAGGCATCACTGCTCGTAACATTCCACGA	PC Details: [Normalization]	chr11_+_118443700_118469468	HMBS	PBG-D|PBGD|UPS	hydroxymethylbilane synthase
hSQ002555	567	AAGTGGGATCGAGACATGTAAGCAGCATCATGGAGGTTTGAAGATGCCGCATTTGGATTGGATGAATTCC	PC Details: [Normalization]	chr15_+_42791008_42797634	B2M	-	beta-2-microglobulin
hSQ004178	2597	ACCAGGTGGTCTCCTCTGACTTCAACAGCGACACCCACTCCTCCACCTTTGACGCTGGGGCTGGCATTGC	PC Details: [Normalization]	chr12_+_6513917_6517798	GAPDH	G3PD|GAPD|MGC88685	glyceraldehyde-3-phosphate dehydrogenase
hSQ021443	7534	CTTATAGCCTGCCTTCAATTTTGATCCTTTATTCTTTCTATTTGTCAGGTGCACAAGATTACCTTCCTGT	PC Details: [Normalization]	chr8_-_102000089_102034745	YWHAZ	KCIP-1|MGC111427|MGC126532|MGC138156	tyrosine 3-monooxygenase/tryptophan 5-monooxygenase activation protein, zeta polypeptide
hSQ038017	6389	TCCTTTGTGGACGTTGGCACTGGGAAGGTCACTCTGGAATATAGACCCGTAATCGACAAAACTTTGAACG	PC Details: [Normalization]	chr5_-_1625375_1627469	SDHA	FP|SDH2|SDHF	succinate dehydrogenase complex, subunit A, flavoprotein (Fp)
hSQ040268	3145	TGCCCAGCATGAAGATGGCCCTGAGGATGACCCACAGTTGGTAGGCATCACTGCTCGTAACATTCCACGA	PC Details: [Normalization]	chr11_+_118443700_118469468	HMBS	PBG-D|PBGD|UPS	hydroxymethylbilane synthase
hSQ002555	567	AAGTGGGATCGAGACATGTAAGCAGCATCATGGAGGTTTGAAGATGCCGCATTTGGATTGGATGAATTCC	PC Details: [Normalization]	chr15_+_42791008_42797634	B2M	-	beta-2-microglobulin
hSQ004178	2597	ACCAGGTGGTCTCCTCTGACTTCAACAGCGACACCCACTCCTCCACCTTTGACGCTGGGGCTGGCATTGC	PC Details: [Normalization]	chr12_+_6513917_6517798	GAPDH	G3PD|GAPD|MGC88685	glyceraldehyde-3-phosphate dehydrogenase
hSQ021443	7534	CTTATAGCCTGCCTTCAATTTTGATCCTTTATTCTTTCTATTTGTCAGGTGCACAAGATTACCTTCCTGT	PC Details: [Normalization]	chr8_-_102000089_102034745	YWHAZ	KCIP-1|MGC111427|MGC126532|MGC138156	tyrosine 3-monooxygenase/tryptophan 5-monooxygenase activation protein, zeta polypeptide
hSQ038017	6389	TCCTTTGTGGACGTTGGCACTGGGAAGGTCACTCTGGAATATAGACCCGTAATCGACAAAACTTTGAACG	PC Details: [Normalization]	chr5_-_1625375_1627469	SDHA	FP|SDH2|SDHF	succinate dehydrogenase complex, subunit A, flavoprotein (Fp)
hSQ040268	3145	TGCCCAGCATGAAGATGGCCCTGAGGATGACCCACAGTTGGTAGGCATCACTGCTCGTAACATTCCACGA	PC Details: [Normalization]	chr11_+_118443700_118469468	HMBS	PBG-D|PBGD|UPS	hydroxymethylbilane synthase
hSQ002555	567	AAGTGGGATCGAGACATGTAAGCAGCATCATGGAGGTTTGAAGATGCCGCATTTGGATTGGATGAATTCC	PC Details: [Normalization]	chr15_+_42791008_42797634	B2M	-	beta-2-microglobulin
hSQ004178	2597	ACCAGGTGGTCTCCTCTGACTTCAACAGCGACACCCACTCCTCCACCTTTGACGCTGGGGCTGGCATTGC	PC Details: [Normalization]	chr12_+_6513917_6517798	GAPDH	G3PD|GAPD|MGC88685	glyceraldehyde-3-phosphate dehydrogenase
hSQ021443	7534	CTTATAGCCTGCCTTCAATTTTGATCCTTTATTCTTTCTATTTGTCAGGTGCACAAGATTACCTTCCTGT	PC Details: [Normalization]	chr8_-_102000089_102034745	YWHAZ	KCIP-1|MGC111427|MGC126532|MGC138156	tyrosine 3-monooxygenase/tryptophan 5-monooxygenase activation protein, zeta polypeptide
hSQ018331	23521	CGGACTCCTGGTCTGAGCCCAATAAAGACTGTTAATTCCTCATGCGTTGCCTGCCCTTCCTCCATTGTTG	PC Details: [Normalization]	chr19_+_54682675_54687374	RPL13A	-	ribosomal protein L13a
hSQ012653	7316	CACTTGGTCCTGCGCTTGAGGGGGGGTGTCTAAGTTTCCCCTTTTAAGGTTTCAACAAATTTCATTGCAC	PC Details: [Normalization]	chr12_-_123921071_123924080	UBC	HMG20	ubiquitin C
hSQ025392	60	GATTGCACATTGTTGTTTTTTTAATAGTCATTCCAAATATGAGATGCATTGTTACAGGAAGTCCCTTGCC	PC Details: [Normalization]	chr7_-_5340026_5343473	ACTB	-	actin, beta
hSQ012541	6908	CACTGAGAACACCGCGCAGCGTGACTGTGAGTTGCTCATACCGTGCTGCTATCTGGGCAGCGCTGCCCAT	PC Details: [Normalization]	chr6_+_170781090_170799578	TBP	GTF2D|GTF2D1|MGC117320|MGC126054|MGC126055|SCA17|TFIID	TATA box binding protein
hSQ021313	3251	CTGTTTATTTGCACTATGAGCCTATAGACTATCAGTTCCCTTTGGGCGGATTGTTGTTTAACTTGTAAAT	PC Details: [Normalization]	chrX_+_133319776_133360216	HPRT1	HGPRT|HPRT	hypoxanthine phosphoribosyltransferase 1 (Lesch-Nyhan syndrome)
hSQ018331	23521	CGGACTCCTGGTCTGAGCCCAATAAAGACTGTTAATTCCTCATGCGTTGCCTGCCCTTCCTCCATTGTTG	PC Details: [Normalization]	chr19_+_54682675_54687374	RPL13A	-	ribosomal protein L13a
hSQ012653	7316	CACTTGGTCCTGCGCTTGAGGGGGGGTGTCTAAGTTTCCCCTTTTAAGGTTTCAACAAATTTCATTGCAC	PC Details: [Normalization]	chr12_-_123921071_123924080	UBC	HMG20	ubiquitin C
hSQ025392	60	GATTGCACATTGTTGTTTTTTTAATAGTCATTCCAAATATGAGATGCATTGTTACAGGAAGTCCCTTGCC	PC Details: [Normalization]	chr7_-_5340026_5343473	ACTB	-	actin, beta
hSQ012541	6908	CACTGAGAACACCGCGCAGCGTGACTGTGAGTTGCTCATACCGTGCTGCTATCTGGGCAGCGCTGCCCAT	PC Details: [Normalization]	chr6_+_170781090_170799578	TBP	GTF2D|GTF2D1|MGC117320|MGC126054|MGC126055|SCA17|TFIID	TATA box binding protein
hSQ021313	3251	CTGTTTATTTGCACTATGAGCCTATAGACTATCAGTTCCCTTTGGGCGGATTGTTGTTTAACTTGTAAAT	PC Details: [Normalization]	chrX_+_133319776_133360216	HPRT1	HGPRT|HPRT	hypoxanthine phosphoribosyltransferase 1 (Lesch-Nyhan syndrome)
hSQ018331	23521	CGGACTCCTGGTCTGAGCCCAATAAAGACTGTTAATTCCTCATGCGTTGCCTGCCCTTCCTCCATTGTTG	PC Details: [Normalization]	chr19_+_54682675_54687374	RPL13A	-	ribosomal protein L13a
hSQ012653	7316	CACTTGGTCCTGCGCTTGAGGGGGGGTGTCTAAGTTTCCCCTTTTAAGGTTTCAACAAATTTCATTGCAC	PC Details: [Normalization]	chr12_-_123921071_123924080	UBC	HMG20	ubiquitin C
hSQ025392	60	GATTGCACATTGTTGTTTTTTTAATAGTCATTCCAAATATGAGATGCATTGTTACAGGAAGTCCCTTGCC	PC Details: [Normalization]	chr7_-_5340026_5343473	ACTB	-	actin, beta
hSQ012541	6908	CACTGAGAACACCGCGCAGCGTGACTGTGAGTTGCTCATACCGTGCTGCTATCTGGGCAGCGCTGCCCAT	PC Details: [Normalization]	chr6_+_170781090_170799578	TBP	GTF2D|GTF2D1|MGC117320|MGC126054|MGC126055|SCA17|TFIID	TATA box binding protein
hSQ021313	3251	CTGTTTATTTGCACTATGAGCCTATAGACTATCAGTTCCCTTTGGGCGGATTGTTGTTTAACTTGTAAAT	PC Details: [Normalization]	chrX_+_133319776_133360216	HPRT1	HGPRT|HPRT	hypoxanthine phosphoribosyltransferase 1 (Lesch-Nyhan syndrome)
hSQ018331	23521	CGGACTCCTGGTCTGAGCCCAATAAAGACTGTTAATTCCTCATGCGTTGCCTGCCCTTCCTCCATTGTTG	PC Details: [Normalization]	chr19_+_54682675_54687374	RPL13A	-	ribosomal protein L13a
hSQ012653	7316	CACTTGGTCCTGCGCTTGAGGGGGGGTGTCTAAGTTTCCCCTTTTAAGGTTTCAACAAATTTCATTGCAC	PC Details: [Normalization]	chr12_-_123921071_123924080	UBC	HMG20	ubiquitin C
hSQ025392	60	GATTGCACATTGTTGTTTTTTTAATAGTCATTCCAAATATGAGATGCATTGTTACAGGAAGTCCCTTGCC	PC Details: [Normalization]	chr7_-_5340026_5343473	ACTB	-	actin, beta
hSQ012541	6908	CACTGAGAACACCGCGCAGCGTGACTGTGAGTTGCTCATACCGTGCTGCTATCTGGGCAGCGCTGCCCAT	PC Details: [Normalization]	chr6_+_170781090_170799578	TBP	GTF2D|GTF2D1|MGC117320|MGC126054|MGC126055|SCA17|TFIID	TATA box binding protein
hSQ021313	3251	CTGTTTATTTGCACTATGAGCCTATAGACTATCAGTTCCCTTTGGGCGGATTGTTGTTTAACTTGTAAAT	PC Details: [Normalization]	chrX_+_133319776_133360216	HPRT1	HGPRT|HPRT	hypoxanthine phosphoribosyltransferase 1 (Lesch-Nyhan syndrome)
hSQ018331	23521	CGGACTCCTGGTCTGAGCCCAATAAAGACTGTTAATTCCTCATGCGTTGCCTGCCCTTCCTCCATTGTTG	PC Details: [Normalization]	chr19_+_54682675_54687374	RPL13A	-	ribosomal protein L13a
hSQ012653	7316	CACTTGGTCCTGCGCTTGAGGGGGGGTGTCTAAGTTTCCCCTTTTAAGGTTTCAACAAATTTCATTGCAC	PC Details: [Normalization]	chr12_-_123921071_123924080	UBC	HMG20	ubiquitin C
hSQ025392	60	GATTGCACATTGTTGTTTTTTTAATAGTCATTCCAAATATGAGATGCATTGTTACAGGAAGTCCCTTGCC	PC Details: [Normalization]	chr7_-_5340026_5343473	ACTB	-	actin, beta
hSQ012541	6908	CACTGAGAACACCGCGCAGCGTGACTGTGAGTTGCTCATACCGTGCTGCTATCTGGGCAGCGCTGCCCAT	PC Details: [Normalization]	chr6_+_170781090_170799578	TBP	GTF2D|GTF2D1|MGC117320|MGC126054|MGC126055|SCA17|TFIID	TATA box binding protein
hSQ004178	2597	ACCAGGTGGTCTCCTCTGACTTCAACAGCGACACCCACTCCTCCACCTTTGACGCTGGGGCTGGCATTGC	PC Details: [Normalization]	chr12_+_6513917_6517798	GAPDH	G3PD|GAPD|MGC88685	glyceraldehyde-3-phosphate dehydrogenase
hSQ021443	7534	CTTATAGCCTGCCTTCAATTTTGATCCTTTATTCTTTCTATTTGTCAGGTGCACAAGATTACCTTCCTGT	PC Details: [Normalization]	chr8_-_102000089_102034745	YWHAZ	KCIP-1|MGC111427|MGC126532|MGC138156	tyrosine 3-monooxygenase/tryptophan 5-monooxygenase activation protein, zeta polypeptide
hSQ038017	6389	TCCTTTGTGGACGTTGGCACTGGGAAGGTCACTCTGGAATATAGACCCGTAATCGACAAAACTTTGAACG	PC Details: [Normalization]	chr5_-_1625375_1627469	SDHA	FP|SDH2|SDHF	succinate dehydrogenase complex, subunit A, flavoprotein (Fp)
hSQ040268	3145	TGCCCAGCATGAAGATGGCCCTGAGGATGACCCACAGTTGGTAGGCATCACTGCTCGTAACATTCCACGA	PC Details: [Normalization]	chr11_+_118443700_118469468	HMBS	PBG-D|PBGD|UPS	hydroxymethylbilane synthase
hSQ002555	567	AAGTGGGATCGAGACATGTAAGCAGCATCATGGAGGTTTGAAGATGCCGCATTTGGATTGGATGAATTCC	PC Details: [Normalization]	chr15_+_42791008_42797634	B2M	-	beta-2-microglobulin
hSQ004178	2597	ACCAGGTGGTCTCCTCTGACTTCAACAGCGACACCCACTCCTCCACCTTTGACGCTGGGGCTGGCATTGC	PC Details: [Normalization]	chr12_+_6513917_6517798	GAPDH	G3PD|GAPD|MGC88685	glyceraldehyde-3-phosphate dehydrogenase
hSQ021443	7534	CTTATAGCCTGCCTTCAATTTTGATCCTTTATTCTTTCTATTTGTCAGGTGCACAAGATTACCTTCCTGT	PC Details: [Normalization]	chr8_-_102000089_102034745	YWHAZ	KCIP-1|MGC111427|MGC126532|MGC138156	tyrosine 3-monooxygenase/tryptophan 5-monooxygenase activation protein, zeta polypeptide
hSQ038017	6389	TCCTTTGTGGACGTTGGCACTGGGAAGGTCACTCTGGAATATAGACCCGTAATCGACAAAACTTTGAACG	PC Details: [Normalization]	chr5_-_1625375_1627469	SDHA	FP|SDH2|SDHF	succinate dehydrogenase complex, subunit A, flavoprotein (Fp)
hSQ040268	3145	TGCCCAGCATGAAGATGGCCCTGAGGATGACCCACAGTTGGTAGGCATCACTGCTCGTAACATTCCACGA	PC Details: [Normalization]	chr11_+_118443700_118469468	HMBS	PBG-D|PBGD|UPS	hydroxymethylbilane synthase
hSQ002555	567	AAGTGGGATCGAGACATGTAAGCAGCATCATGGAGGTTTGAAGATGCCGCATTTGGATTGGATGAATTCC	PC Details: [Normalization]	chr15_+_42791008_42797634	B2M	-	beta-2-microglobulin
hSQ004178	2597	ACCAGGTGGTCTCCTCTGACTTCAACAGCGACACCCACTCCTCCACCTTTGACGCTGGGGCTGGCATTGC	PC Details: [Normalization]	chr12_+_6513917_6517798	GAPDH	G3PD|GAPD|MGC88685	glyceraldehyde-3-phosphate dehydrogenase
hSQ021443	7534	CTTATAGCCTGCCTTCAATTTTGATCCTTTATTCTTTCTATTTGTCAGGTGCACAAGATTACCTTCCTGT	PC Details: [Normalization]	chr8_-_102000089_102034745	YWHAZ	KCIP-1|MGC111427|MGC126532|MGC138156	tyrosine 3-monooxygenase/tryptophan 5-monooxygenase activation protein, zeta polypeptide
hSQ038017	6389	TCCTTTGTGGACGTTGGCACTGGGAAGGTCACTCTGGAATATAGACCCGTAATCGACAAAACTTTGAACG	PC Details: [Normalization]	chr5_-_1625375_1627469	SDHA	FP|SDH2|SDHF	succinate dehydrogenase complex, subunit A, flavoprotein (Fp)
hSQ040268	3145	TGCCCAGCATGAAGATGGCCCTGAGGATGACCCACAGTTGGTAGGCATCACTGCTCGTAACATTCCACGA	PC Details: [Normalization]	chr11_+_118443700_118469468	HMBS	PBG-D|PBGD|UPS	hydroxymethylbilane synthase
hSQ002555	567	AAGTGGGATCGAGACATGTAAGCAGCATCATGGAGGTTTGAAGATGCCGCATTTGGATTGGATGAATTCC	PC Details: [Normalization]	chr15_+_42791008_42797634	B2M	-	beta-2-microglobulin
hSQ004178	2597	ACCAGGTGGTCTCCTCTGACTTCAACAGCGACACCCACTCCTCCACCTTTGACGCTGGGGCTGGCATTGC	PC Details: [Normalization]	chr12_+_6513917_6517798	GAPDH	G3PD|GAPD|MGC88685	glyceraldehyde-3-phosphate dehydrogenase
hSQ021443	7534	CTTATAGCCTGCCTTCAATTTTGATCCTTTATTCTTTCTATTTGTCAGGTGCACAAGATTACCTTCCTGT	PC Details: [Normalization]	chr8_-_102000089_102034745	YWHAZ	KCIP-1|MGC111427|MGC126532|MGC138156	tyrosine 3-monooxygenase/tryptophan 5-monooxygenase activation protein, zeta polypeptide
hSQ038017	6389	TCCTTTGTGGACGTTGGCACTGGGAAGGTCACTCTGGAATATAGACCCGTAATCGACAAAACTTTGAACG	PC Details: [Normalization]	chr5_-_1625375_1627469	SDHA	FP|SDH2|SDHF	succinate dehydrogenase complex, subunit A, flavoprotein (Fp)
hSQ040268	3145	TGCCCAGCATGAAGATGGCCCTGAGGATGACCCACAGTTGGTAGGCATCACTGCTCGTAACATTCCACGA	PC Details: [Normalization]	chr11_+_118443700_118469468	HMBS	PBG-D|PBGD|UPS	hydroxymethylbilane synthase
hSQ002555	567	AAGTGGGATCGAGACATGTAAGCAGCATCATGGAGGTTTGAAGATGCCGCATTTGGATTGGATGAATTCC	PC Details: [Normalization]	chr15_+_42791008_42797634	B2M	-	beta-2-microglobulin
hSQ004178	2597	ACCAGGTGGTCTCCTCTGACTTCAACAGCGACACCCACTCCTCCACCTTTGACGCTGGGGCTGGCATTGC	PC Details: [Normalization]	chr12_+_6513917_6517798	GAPDH	G3PD|GAPD|MGC88685	glyceraldehyde-3-phosphate dehydrogenase
hSQ021443	7534	CTTATAGCCTGCCTTCAATTTTGATCCTTTATTCTTTCTATTTGTCAGGTGCACAAGATTACCTTCCTGT	PC Details: [Normalization]	chr8_-_102000089_102034745	YWHAZ	KCIP-1|MGC111427|MGC126532|MGC138156	tyrosine 3-monooxygenase/tryptophan 5-monooxygenase activation protein, zeta polypeptide
hSQ038017	6389	TCCTTTGTGGACGTTGGCACTGGGAAGGTCACTCTGGAATATAGACCCGTAATCGACAAAACTTTGAACG	PC Details: [Normalization]	chr5_-_1625375_1627469	SDHA	FP|SDH2|SDHF	succinate dehydrogenase complex, subunit A, flavoprotein (Fp)
hSQ040268	3145	TGCCCAGCATGAAGATGGCCCTGAGGATGACCCACAGTTGGTAGGCATCACTGCTCGTAACATTCCACGA	PC Details: [Normalization]	chr11_+_118443700_118469468	HMBS	PBG-D|PBGD|UPS	hydroxymethylbilane synthase
hSQ025392	60	GATTGCACATTGTTGTTTTTTTAATAGTCATTCCAAATATGAGATGCATTGTTACAGGAAGTCCCTTGCC	PC Details: [Normalization]	chr7_-_5340026_5343473	ACTB	-	actin, beta
hSQ012541	6908	CACTGAGAACACCGCGCAGCGTGACTGTGAGTTGCTCATACCGTGCTGCTATCTGGGCAGCGCTGCCCAT	PC Details: [Normalization]	chr6_+_170781090_170799578	TBP	GTF2D|GTF2D1|MGC117320|MGC126054|MGC126055|SCA17|TFIID	TATA box binding protein
hSQ021313	3251	CTGTTTATTTGCACTATGAGCCTATAGACTATCAGTTCCCTTTGGGCGGATTGTTGTTTAACTTGTAAAT	PC Details: [Normalization]	chrX_+_133319776_133360216	HPRT1	HGPRT|HPRT	hypoxanthine phosphoribosyltransferase 1 (Lesch-Nyhan syndrome)
hSQ018331	23521	CGGACTCCTGGTCTGAGCCCAATAAAGACTGTTAATTCCTCATGCGTTGCCTGCCCTTCCTCCATTGTTG	PC Details: [Normalization]	chr19_+_54682675_54687374	RPL13A	-	ribosomal protein L13a
hSQ012653	7316	CACTTGGTCCTGCGCTTGAGGGGGGGTGTCTAAGTTTCCCCTTTTAAGGTTTCAACAAATTTCATTGCAC	PC Details: [Normalization]	chr12_-_123921071_123924080	UBC	HMG20	ubiquitin C
hSQ025392	60	GATTGCACATTGTTGTTTTTTTAATAGTCATTCCAAATATGAGATGCATTGTTACAGGAAGTCCCTTGCC	PC Details: [Normalization]	chr7_-_5340026_5343473	ACTB	-	actin, beta
hSQ012541	6908	CACTGAGAACACCGCGCAGCGTGACTGTGAGTTGCTCATACCGTGCTGCTATCTGGGCAGCGCTGCCCAT	PC Details: [Normalization]	chr6_+_170781090_170799578	TBP	GTF2D|GTF2D1|MGC117320|MGC126054|MGC126055|SCA17|TFIID	TATA box binding protein
hSQ021313	3251	CTGTTTATTTGCACTATGAGCCTATAGACTATCAGTTCCCTTTGGGCGGATTGTTGTTTAACTTGTAAAT	PC Details: [Normalization]	chrX_+_133319776_133360216	HPRT1	HGPRT|HPRT	hypoxanthine phosphoribosyltransferase 1 (Lesch-Nyhan syndrome)
hSQ018331	23521	CGGACTCCTGGTCTGAGCCCAATAAAGACTGTTAATTCCTCATGCGTTGCCTGCCCTTCCTCCATTGTTG	PC Details: [Normalization]	chr19_+_54682675_54687374	RPL13A	-	ribosomal protein L13a
hSQ012653	7316	CACTTGGTCCTGCGCTTGAGGGGGGGTGTCTAAGTTTCCCCTTTTAAGGTTTCAACAAATTTCATTGCAC	PC Details: [Normalization]	chr12_-_123921071_123924080	UBC	HMG20	ubiquitin C
hSQ025392	60	GATTGCACATTGTTGTTTTTTTAATAGTCATTCCAAATATGAGATGCATTGTTACAGGAAGTCCCTTGCC	PC Details: [Normalization]	chr7_-_5340026_5343473	ACTB	-	actin, beta
hSQ012541	6908	CACTGAGAACACCGCGCAGCGTGACTGTGAGTTGCTCATACCGTGCTGCTATCTGGGCAGCGCTGCCCAT	PC Details: [Normalization]	chr6_+_170781090_170799578	TBP	GTF2D|GTF2D1|MGC117320|MGC126054|MGC126055|SCA17|TFIID	TATA box binding protein
hSQ021313	3251	CTGTTTATTTGCACTATGAGCCTATAGACTATCAGTTCCCTTTGGGCGGATTGTTGTTTAACTTGTAAAT	PC Details: [Normalization]	chrX_+_133319776_133360216	HPRT1	HGPRT|HPRT	hypoxanthine phosphoribosyltransferase 1 (Lesch-Nyhan syndrome)
hSQ018331	23521	CGGACTCCTGGTCTGAGCCCAATAAAGACTGTTAATTCCTCATGCGTTGCCTGCCCTTCCTCCATTGTTG	PC Details: [Normalization]	chr19_+_54682675_54687374	RPL13A	-	ribosomal protein L13a
hSQ012653	7316	CACTTGGTCCTGCGCTTGAGGGGGGGTGTCTAAGTTTCCCCTTTTAAGGTTTCAACAAATTTCATTGCAC	PC Details: [Normalization]	chr12_-_123921071_123924080	UBC	HMG20	ubiquitin C
hSQ025392	60	GATTGCACATTGTTGTTTTTTTAATAGTCATTCCAAATATGAGATGCATTGTTACAGGAAGTCCCTTGCC	PC Details: [Normalization]	chr7_-_5340026_5343473	ACTB	-	actin, beta
hSQ012541	6908	CACTGAGAACACCGCGCAGCGTGACTGTGAGTTGCTCATACCGTGCTGCTATCTGGGCAGCGCTGCCCAT	PC Details: [Normalization]	chr6_+_170781090_170799578	TBP	GTF2D|GTF2D1|MGC117320|MGC126054|MGC126055|SCA17|TFIID	TATA box binding protein
hSQ021313	3251	CTGTTTATTTGCACTATGAGCCTATAGACTATCAGTTCCCTTTGGGCGGATTGTTGTTTAACTTGTAAAT	PC Details: [Normalization]	chrX_+_133319776_133360216	HPRT1	HGPRT|HPRT	hypoxanthine phosphoribosyltransferase 1 (Lesch-Nyhan syndrome)
hSQ018331	23521	CGGACTCCTGGTCTGAGCCCAATAAAGACTGTTAATTCCTCATGCGTTGCCTGCCCTTCCTCCATTGTTG	PC Details: [Normalization]	chr19_+_54682675_54687374	RPL13A	-	ribosomal protein L13a
hSQ012653	7316	CACTTGGTCCTGCGCTTGAGGGGGGGTGTCTAAGTTTCCCCTTTTAAGGTTTCAACAAATTTCATTGCAC	PC Details: [Normalization]	chr12_-_123921071_123924080	UBC	HMG20	ubiquitin C
hSQ025392	60	GATTGCACATTGTTGTTTTTTTAATAGTCATTCCAAATATGAGATGCATTGTTACAGGAAGTCCCTTGCC	PC Details: [Normalization]	chr7_-_5340026_5343473	ACTB	-	actin, beta
hSQ012541	6908	CACTGAGAACACCGCGCAGCGTGACTGTGAGTTGCTCATACCGTGCTGCTATCTGGGCAGCGCTGCCCAT	PC Details: [Normalization]	chr6_+_170781090_170799578	TBP	GTF2D|GTF2D1|MGC117320|MGC126054|MGC126055|SCA17|TFIID	TATA box binding protein
hSQ021313	3251	CTGTTTATTTGCACTATGAGCCTATAGACTATCAGTTCCCTTTGGGCGGATTGTTGTTTAACTTGTAAAT	PC Details: [Normalization]	chrX_+_133319776_133360216	HPRT1	HGPRT|HPRT	hypoxanthine phosphoribosyltransferase 1 (Lesch-Nyhan syndrome)
hSQ018331	23521	CGGACTCCTGGTCTGAGCCCAATAAAGACTGTTAATTCCTCATGCGTTGCCTGCCCTTCCTCCATTGTTG	PC Details: [Normalization]	chr19_+_54682675_54687374	RPL13A	-	ribosomal protein L13a
hSQ038017	6389	TCCTTTGTGGACGTTGGCACTGGGAAGGTCACTCTGGAATATAGACCCGTAATCGACAAAACTTTGAACG	PC Details: [Normalization]	chr5_-_1625375_1627469	SDHA	FP|SDH2|SDHF	succinate dehydrogenase complex, subunit A, flavoprotein (Fp)
hSQ040268	3145	TGCCCAGCATGAAGATGGCCCTGAGGATGACCCACAGTTGGTAGGCATCACTGCTCGTAACATTCCACGA	PC Details: [Normalization]	chr11_+_118443700_118469468	HMBS	PBG-D|PBGD|UPS	hydroxymethylbilane synthase
hSQ002555	567	AAGTGGGATCGAGACATGTAAGCAGCATCATGGAGGTTTGAAGATGCCGCATTTGGATTGGATGAATTCC	PC Details: [Normalization]	chr15_+_42791008_42797634	B2M	-	beta-2-microglobulin
hSQ004178	2597	ACCAGGTGGTCTCCTCTGACTTCAACAGCGACACCCACTCCTCCACCTTTGACGCTGGGGCTGGCATTGC	PC Details: [Normalization]	chr12_+_6513917_6517798	GAPDH	G3PD|GAPD|MGC88685	glyceraldehyde-3-phosphate dehydrogenase
hSQ021443	7534	CTTATAGCCTGCCTTCAATTTTGATCCTTTATTCTTTCTATTTGTCAGGTGCACAAGATTACCTTCCTGT	PC Details: [Normalization]	chr8_-_102000089_102034745	YWHAZ	KCIP-1|MGC111427|MGC126532|MGC138156	tyrosine 3-monooxygenase/tryptophan 5-monooxygenase activation protein, zeta polypeptide
hSQ038017	6389	TCCTTTGTGGACGTTGGCACTGGGAAGGTCACTCTGGAATATAGACCCGTAATCGACAAAACTTTGAACG	PC Details: [Normalization]	chr5_-_1625375_1627469	SDHA	FP|SDH2|SDHF	succinate dehydrogenase complex, subunit A, flavoprotein (Fp)
hSQ040268	3145	TGCCCAGCATGAAGATGGCCCTGAGGATGACCCACAGTTGGTAGGCATCACTGCTCGTAACATTCCACGA	PC Details: [Normalization]	chr11_+_118443700_118469468	HMBS	PBG-D|PBGD|UPS	hydroxymethylbilane synthase
hSQ002555	567	AAGTGGGATCGAGACATGTAAGCAGCATCATGGAGGTTTGAAGATGCCGCATTTGGATTGGATGAATTCC	PC Details: [Normalization]	chr15_+_42791008_42797634	B2M	-	beta-2-microglobulin
hSQ004178	2597	ACCAGGTGGTCTCCTCTGACTTCAACAGCGACACCCACTCCTCCACCTTTGACGCTGGGGCTGGCATTGC	PC Details: [Normalization]	chr12_+_6513917_6517798	GAPDH	G3PD|GAPD|MGC88685	glyceraldehyde-3-phosphate dehydrogenase
hSQ021443	7534	CTTATAGCCTGCCTTCAATTTTGATCCTTTATTCTTTCTATTTGTCAGGTGCACAAGATTACCTTCCTGT	PC Details: [Normalization]	chr8_-_102000089_102034745	YWHAZ	KCIP-1|MGC111427|MGC126532|MGC138156	tyrosine 3-monooxygenase/tryptophan 5-monooxygenase activation protein, zeta polypeptide
hSQ038017	6389	TCCTTTGTGGACGTTGGCACTGGGAAGGTCACTCTGGAATATAGACCCGTAATCGACAAAACTTTGAACG	PC Details: [Normalization]	chr5_-_1625375_1627469	SDHA	FP|SDH2|SDHF	succinate dehydrogenase complex, subunit A, flavoprotein (Fp)
hSQ040268	3145	TGCCCAGCATGAAGATGGCCCTGAGGATGACCCACAGTTGGTAGGCATCACTGCTCGTAACATTCCACGA	PC Details: [Normalization]	chr11_+_118443700_118469468	HMBS	PBG-D|PBGD|UPS	hydroxymethylbilane synthase
hSQ002555	567	AAGTGGGATCGAGACATGTAAGCAGCATCATGGAGGTTTGAAGATGCCGCATTTGGATTGGATGAATTCC	PC Details: [Normalization]	chr15_+_42791008_42797634	B2M	-	beta-2-microglobulin
hSQ004178	2597	ACCAGGTGGTCTCCTCTGACTTCAACAGCGACACCCACTCCTCCACCTTTGACGCTGGGGCTGGCATTGC	PC Details: [Normalization]	chr12_+_6513917_6517798	GAPDH	G3PD|GAPD|MGC88685	glyceraldehyde-3-phosphate dehydrogenase
hSQ021443	7534	CTTATAGCCTGCCTTCAATTTTGATCCTTTATTCTTTCTATTTGTCAGGTGCACAAGATTACCTTCCTGT	PC Details: [Normalization]	chr8_-_102000089_102034745	YWHAZ	KCIP-1|MGC111427|MGC126532|MGC138156	tyrosine 3-monooxygenase/tryptophan 5-monooxygenase activation protein, zeta polypeptide
hSQ038017	6389	TCCTTTGTGGACGTTGGCACTGGGAAGGTCACTCTGGAATATAGACCCGTAATCGACAAAACTTTGAACG	PC Details: [Normalization]	chr5_-_1625375_1627469	SDHA	FP|SDH2|SDHF	succinate dehydrogenase complex, subunit A, flavoprotein (Fp)
hSQ040268	3145	TGCCCAGCATGAAGATGGCCCTGAGGATGACCCACAGTTGGTAGGCATCACTGCTCGTAACATTCCACGA	PC Details: [Normalization]	chr11_+_118443700_118469468	HMBS	PBG-D|PBGD|UPS	hydroxymethylbilane synthase
hSQ002555	567	AAGTGGGATCGAGACATGTAAGCAGCATCATGGAGGTTTGAAGATGCCGCATTTGGATTGGATGAATTCC	PC Details: [Normalization]	chr15_+_42791008_42797634	B2M	-	beta-2-microglobulin
hSQ004178	2597	ACCAGGTGGTCTCCTCTGACTTCAACAGCGACACCCACTCCTCCACCTTTGACGCTGGGGCTGGCATTGC	PC Details: [Normalization]	chr12_+_6513917_6517798	GAPDH	G3PD|GAPD|MGC88685	glyceraldehyde-3-phosphate dehydrogenase
hSQ021443	7534	CTTATAGCCTGCCTTCAATTTTGATCCTTTATTCTTTCTATTTGTCAGGTGCACAAGATTACCTTCCTGT	PC Details: [Normalization]	chr8_-_102000089_102034745	YWHAZ	KCIP-1|MGC111427|MGC126532|MGC138156	tyrosine 3-monooxygenase/tryptophan 5-monooxygenase activation protein, zeta polypeptide
hSQ038017	6389	TCCTTTGTGGACGTTGGCACTGGGAAGGTCACTCTGGAATATAGACCCGTAATCGACAAAACTTTGAACG	PC Details: [Normalization]	chr5_-_1625375_1627469	SDHA	FP|SDH2|SDHF	succinate dehydrogenase complex, subunit A, flavoprotein (Fp)
hSQ040268	3145	TGCCCAGCATGAAGATGGCCCTGAGGATGACCCACAGTTGGTAGGCATCACTGCTCGTAACATTCCACGA	PC Details: [Normalization]	chr11_+_118443700_118469468	HMBS	PBG-D|PBGD|UPS	hydroxymethylbilane synthase
hSQ002555	567	AAGTGGGATCGAGACATGTAAGCAGCATCATGGAGGTTTGAAGATGCCGCATTTGGATTGGATGAATTCC	PC Details: [Normalization]	chr15_+_42791008_42797634	B2M	-	beta-2-microglobulin
hSQ004178	2597	ACCAGGTGGTCTCCTCTGACTTCAACAGCGACACCCACTCCTCCACCTTTGACGCTGGGGCTGGCATTGC	PC Details: [Normalization]	chr12_+_6513917_6517798	GAPDH	G3PD|GAPD|MGC88685	glyceraldehyde-3-phosphate dehydrogenase
hSQ021313	3251	CTGTTTATTTGCACTATGAGCCTATAGACTATCAGTTCCCTTTGGGCGGATTGTTGTTTAACTTGTAAAT	PC Details: [Normalization]	chrX_+_133319776_133360216	HPRT1	HGPRT|HPRT	hypoxanthine phosphoribosyltransferase 1 (Lesch-Nyhan syndrome)
hSQ018331	23521	CGGACTCCTGGTCTGAGCCCAATAAAGACTGTTAATTCCTCATGCGTTGCCTGCCCTTCCTCCATTGTTG	PC Details: [Normalization]	chr19_+_54682675_54687374	RPL13A	-	ribosomal protein L13a
hSQ012653	7316	CACTTGGTCCTGCGCTTGAGGGGGGGTGTCTAAGTTTCCCCTTTTAAGGTTTCAACAAATTTCATTGCAC	PC Details: [Normalization]	chr12_-_123921071_123924080	UBC	HMG20	ubiquitin C
hSQ025392	60	GATTGCACATTGTTGTTTTTTTAATAGTCATTCCAAATATGAGATGCATTGTTACAGGAAGTCCCTTGCC	PC Details: [Normalization]	chr7_-_5340026_5343473	ACTB	-	actin, beta
hSQ012541	6908	CACTGAGAACACCGCGCAGCGTGACTGTGAGTTGCTCATACCGTGCTGCTATCTGGGCAGCGCTGCCCAT	PC Details: [Normalization]	chr6_+_170781090_170799578	TBP	GTF2D|GTF2D1|MGC117320|MGC126054|MGC126055|SCA17|TFIID	TATA box binding protein
hSQ021313	3251	CTGTTTATTTGCACTATGAGCCTATAGACTATCAGTTCCCTTTGGGCGGATTGTTGTTTAACTTGTAAAT	PC Details: [Normalization]	chrX_+_133319776_133360216	HPRT1	HGPRT|HPRT	hypoxanthine phosphoribosyltransferase 1 (Lesch-Nyhan syndrome)
hSQ018331	23521	CGGACTCCTGGTCTGAGCCCAATAAAGACTGTTAATTCCTCATGCGTTGCCTGCCCTTCCTCCATTGTTG	PC Details: [Normalization]	chr19_+_54682675_54687374	RPL13A	-	ribosomal protein L13a
hSQ012653	7316	CACTTGGTCCTGCGCTTGAGGGGGGGTGTCTAAGTTTCCCCTTTTAAGGTTTCAACAAATTTCATTGCAC	PC Details: [Normalization]	chr12_-_123921071_123924080	UBC	HMG20	ubiquitin C
hSQ025392	60	GATTGCACATTGTTGTTTTTTTAATAGTCATTCCAAATATGAGATGCATTGTTACAGGAAGTCCCTTGCC	PC Details: [Normalization]	chr7_-_5340026_5343473	ACTB	-	actin, beta
hSQ012541	6908	CACTGAGAACACCGCGCAGCGTGACTGTGAGTTGCTCATACCGTGCTGCTATCTGGGCAGCGCTGCCCAT	PC Details: [Normalization]	chr6_+_170781090_170799578	TBP	GTF2D|GTF2D1|MGC117320|MGC126054|MGC126055|SCA17|TFIID	TATA box binding protein
hSQ021313	3251	CTGTTTATTTGCACTATGAGCCTATAGACTATCAGTTCCCTTTGGGCGGATTGTTGTTTAACTTGTAAAT	PC Details: [Normalization]	chrX_+_133319776_133360216	HPRT1	HGPRT|HPRT	hypoxanthine phosphoribosyltransferase 1 (Lesch-Nyhan syndrome)
hSQ018331	23521	CGGACTCCTGGTCTGAGCCCAATAAAGACTGTTAATTCCTCATGCGTTGCCTGCCCTTCCTCCATTGTTG	PC Details: [Normalization]	chr19_+_54682675_54687374	RPL13A	-	ribosomal protein L13a
hSQ012653	7316	CACTTGGTCCTGCGCTTGAGGGGGGGTGTCTAAGTTTCCCCTTTTAAGGTTTCAACAAATTTCATTGCAC	PC Details: [Normalization]	chr12_-_123921071_123924080	UBC	HMG20	ubiquitin C
hSQ025392	60	GATTGCACATTGTTGTTTTTTTAATAGTCATTCCAAATATGAGATGCATTGTTACAGGAAGTCCCTTGCC	PC Details: [Normalization]	chr7_-_5340026_5343473	ACTB	-	actin, beta
hSQ012541	6908	CACTGAGAACACCGCGCAGCGTGACTGTGAGTTGCTCATACCGTGCTGCTATCTGGGCAGCGCTGCCCAT	PC Details: [Normalization]	chr6_+_170781090_170799578	TBP	GTF2D|GTF2D1|MGC117320|MGC126054|MGC126055|SCA17|TFIID	TATA box binding protein
hSQ021313	3251	CTGTTTATTTGCACTATGAGCCTATAGACTATCAGTTCCCTTTGGGCGGATTGTTGTTTAACTTGTAAAT	PC Details: [Normalization]	chrX_+_133319776_133360216	HPRT1	HGPRT|HPRT	hypoxanthine phosphoribosyltransferase 1 (Lesch-Nyhan syndrome)
hSQ018331	23521	CGGACTCCTGGTCTGAGCCCAATAAAGACTGTTAATTCCTCATGCGTTGCCTGCCCTTCCTCCATTGTTG	PC Details: [Normalization]	chr19_+_54682675_54687374	RPL13A	-	ribosomal protein L13a
hSQ012653	7316	CACTTGGTCCTGCGCTTGAGGGGGGGTGTCTAAGTTTCCCCTTTTAAGGTTTCAACAAATTTCATTGCAC	PC Details: [Normalization]	chr12_-_123921071_123924080	UBC	HMG20	ubiquitin C
hSQ025392	60	GATTGCACATTGTTGTTTTTTTAATAGTCATTCCAAATATGAGATGCATTGTTACAGGAAGTCCCTTGCC	PC Details: [Normalization]	chr7_-_5340026_5343473	ACTB	-	actin, beta
hSQ012541	6908	CACTGAGAACACCGCGCAGCGTGACTGTGAGTTGCTCATACCGTGCTGCTATCTGGGCAGCGCTGCCCAT	PC Details: [Normalization]	chr6_+_170781090_170799578	TBP	GTF2D|GTF2D1|MGC117320|MGC126054|MGC126055|SCA17|TFIID	TATA box binding protein
hSQ021313	3251	CTGTTTATTTGCACTATGAGCCTATAGACTATCAGTTCCCTTTGGGCGGATTGTTGTTTAACTTGTAAAT	PC Details: [Normalization]	chrX_+_133319776_133360216	HPRT1	HGPRT|HPRT	hypoxanthine phosphoribosyltransferase 1 (Lesch-Nyhan syndrome)
hSQ018331	23521	CGGACTCCTGGTCTGAGCCCAATAAAGACTGTTAATTCCTCATGCGTTGCCTGCCCTTCCTCCATTGTTG	PC Details: [Normalization]	chr19_+_54682675_54687374	RPL13A	-	ribosomal protein L13a
hSQ012653	7316	CACTTGGTCCTGCGCTTGAGGGGGGGTGTCTAAGTTTCCCCTTTTAAGGTTTCAACAAATTTCATTGCAC	PC Details: [Normalization]	chr12_-_123921071_123924080	UBC	HMG20	ubiquitin C
hSQ025392	60	GATTGCACATTGTTGTTTTTTTAATAGTCATTCCAAATATGAGATGCATTGTTACAGGAAGTCCCTTGCC	PC Details: [Normalization]	chr7_-_5340026_5343473	ACTB	-	actin, beta
hSQ002555	567	AAGTGGGATCGAGACATGTAAGCAGCATCATGGAGGTTTGAAGATGCCGCATTTGGATTGGATGAATTCC	PC Details: [Normalization]	chr15_+_42791008_42797634	B2M	-	beta-2-microglobulin
hSQ004178	2597	ACCAGGTGGTCTCCTCTGACTTCAACAGCGACACCCACTCCTCCACCTTTGACGCTGGGGCTGGCATTGC	PC Details: [Normalization]	chr12_+_6513917_6517798	GAPDH	G3PD|GAPD|MGC88685	glyceraldehyde-3-phosphate dehydrogenase
hSQ021443	7534	CTTATAGCCTGCCTTCAATTTTGATCCTTTATTCTTTCTATTTGTCAGGTGCACAAGATTACCTTCCTGT	PC Details: [Normalization]	chr8_-_102000089_102034745	YWHAZ	KCIP-1|MGC111427|MGC126532|MGC138156	tyrosine 3-monooxygenase/tryptophan 5-monooxygenase activation protein, zeta polypeptide
hSQ038017	6389	TCCTTTGTGGACGTTGGCACTGGGAAGGTCACTCTGGAATATAGACCCGTAATCGACAAAACTTTGAACG	PC Details: [Normalization]	chr5_-_1625375_1627469	SDHA	FP|SDH2|SDHF	succinate dehydrogenase complex, subunit A, flavoprotein (Fp)
hSQ040268	3145	TGCCCAGCATGAAGATGGCCCTGAGGATGACCCACAGTTGGTAGGCATCACTGCTCGTAACATTCCACGA	PC Details: [Normalization]	chr11_+_118443700_118469468	HMBS	PBG-D|PBGD|UPS	hydroxymethylbilane synthase
hSQ002555	567	AAGTGGGATCGAGACATGTAAGCAGCATCATGGAGGTTTGAAGATGCCGCATTTGGATTGGATGAATTCC	PC Details: [Normalization]	chr15_+_42791008_42797634	B2M	-	beta-2-microglobulin
hSQ004178	2597	ACCAGGTGGTCTCCTCTGACTTCAACAGCGACACCCACTCCTCCACCTTTGACGCTGGGGCTGGCATTGC	PC Details: [Normalization]	chr12_+_6513917_6517798	GAPDH	G3PD|GAPD|MGC88685	glyceraldehyde-3-phosphate dehydrogenase
hSQ021443	7534	CTTATAGCCTGCCTTCAATTTTGATCCTTTATTCTTTCTATTTGTCAGGTGCACAAGATTACCTTCCTGT	PC Details: [Normalization]	chr8_-_102000089_102034745	YWHAZ	KCIP-1|MGC111427|MGC126532|MGC138156	tyrosine 3-monooxygenase/tryptophan 5-monooxygenase activation protein, zeta polypeptide
hSQ038017	6389	TCCTTTGTGGACGTTGGCACTGGGAAGGTCACTCTGGAATATAGACCCGTAATCGACAAAACTTTGAACG	PC Details: [Normalization]	chr5_-_1625375_1627469	SDHA	FP|SDH2|SDHF	succinate dehydrogenase complex, subunit A, flavoprotein (Fp)
hSQ040268	3145	TGCCCAGCATGAAGATGGCCCTGAGGATGACCCACAGTTGGTAGGCATCACTGCTCGTAACATTCCACGA	PC Details: [Normalization]	chr11_+_118443700_118469468	HMBS	PBG-D|PBGD|UPS	hydroxymethylbilane synthase
hSQ002555	567	AAGTGGGATCGAGACATGTAAGCAGCATCATGGAGGTTTGAAGATGCCGCATTTGGATTGGATGAATTCC	PC Details: [Normalization]	chr15_+_42791008_42797634	B2M	-	beta-2-microglobulin
hSQ004178	2597	ACCAGGTGGTCTCCTCTGACTTCAACAGCGACACCCACTCCTCCACCTTTGACGCTGGGGCTGGCATTGC	PC Details: [Normalization]	chr12_+_6513917_6517798	GAPDH	G3PD|GAPD|MGC88685	glyceraldehyde-3-phosphate dehydrogenase
hSQ021443	7534	CTTATAGCCTGCCTTCAATTTTGATCCTTTATTCTTTCTATTTGTCAGGTGCACAAGATTACCTTCCTGT	PC Details: [Normalization]	chr8_-_102000089_102034745	YWHAZ	KCIP-1|MGC111427|MGC126532|MGC138156	tyrosine 3-monooxygenase/tryptophan 5-monooxygenase activation protein, zeta polypeptide
hSQ038017	6389	TCCTTTGTGGACGTTGGCACTGGGAAGGTCACTCTGGAATATAGACCCGTAATCGACAAAACTTTGAACG	PC Details: [Normalization]	chr5_-_1625375_1627469	SDHA	FP|SDH2|SDHF	succinate dehydrogenase complex, subunit A, flavoprotein (Fp)
hSQ040268	3145	TGCCCAGCATGAAGATGGCCCTGAGGATGACCCACAGTTGGTAGGCATCACTGCTCGTAACATTCCACGA	PC Details: [Normalization]	chr11_+_118443700_118469468	HMBS	PBG-D|PBGD|UPS	hydroxymethylbilane synthase
hSQ002555	567	AAGTGGGATCGAGACATGTAAGCAGCATCATGGAGGTTTGAAGATGCCGCATTTGGATTGGATGAATTCC	PC Details: [Normalization]	chr15_+_42791008_42797634	B2M	-	beta-2-microglobulin
hSQ004178	2597	ACCAGGTGGTCTCCTCTGACTTCAACAGCGACACCCACTCCTCCACCTTTGACGCTGGGGCTGGCATTGC	PC Details: [Normalization]	chr12_+_6513917_6517798	GAPDH	G3PD|GAPD|MGC88685	glyceraldehyde-3-phosphate dehydrogenase
hSQ021443	7534	CTTATAGCCTGCCTTCAATTTTGATCCTTTATTCTTTCTATTTGTCAGGTGCACAAGATTACCTTCCTGT	PC Details: [Normalization]	chr8_-_102000089_102034745	YWHAZ	KCIP-1|MGC111427|MGC126532|MGC138156	tyrosine 3-monooxygenase/tryptophan 5-monooxygenase activation protein, zeta polypeptide
hSQ038017	6389	TCCTTTGTGGACGTTGGCACTGGGAAGGTCACTCTGGAATATAGACCCGTAATCGACAAAACTTTGAACG	PC Details: [Normalization]	chr5_-_1625375_1627469	SDHA	FP|SDH2|SDHF	succinate dehydrogenase complex, subunit A, flavoprotein (Fp)
hSQ040268	3145	TGCCCAGCATGAAGATGGCCCTGAGGATGACCCACAGTTGGTAGGCATCACTGCTCGTAACATTCCACGA	PC Details: [Normalization]	chr11_+_118443700_118469468	HMBS	PBG-D|PBGD|UPS	hydroxymethylbilane synthase
hSQ002555	567	AAGTGGGATCGAGACATGTAAGCAGCATCATGGAGGTTTGAAGATGCCGCATTTGGATTGGATGAATTCC	PC Details: [Normalization]	chr15_+_42791008_42797634	B2M	-	beta-2-microglobulin
hSQ004178	2597	ACCAGGTGGTCTCCTCTGACTTCAACAGCGACACCCACTCCTCCACCTTTGACGCTGGGGCTGGCATTGC	PC Details: [Normalization]	chr12_+_6513917_6517798	GAPDH	G3PD|GAPD|MGC88685	glyceraldehyde-3-phosphate dehydrogenase
hSQ021443	7534	CTTATAGCCTGCCTTCAATTTTGATCCTTTATTCTTTCTATTTGTCAGGTGCACAAGATTACCTTCCTGT	PC Details: [Normalization]	chr8_-_102000089_102034745	YWHAZ	KCIP-1|MGC111427|MGC126532|MGC138156	tyrosine 3-monooxygenase/tryptophan 5-monooxygenase activation protein, zeta polypeptide
hSQ038017	6389	TCCTTTGTGGACGTTGGCACTGGGAAGGTCACTCTGGAATATAGACCCGTAATCGACAAAACTTTGAACG	PC Details: [Normalization]	chr5_-_1625375_1627469	SDHA	FP|SDH2|SDHF	succinate dehydrogenase complex, subunit A, flavoprotein (Fp)
hSQ012653	7316	CACTTGGTCCTGCGCTTGAGGGGGGGTGTCTAAGTTTCCCCTTTTAAGGTTTCAACAAATTTCATTGCAC	PC Details: [Normalization]	chr12_-_123921071_123924080	UBC	HMG20	ubiquitin C
hSQ025392	60	GATTGCACATTGTTGTTTTTTTAATAGTCATTCCAAATATGAGATGCATTGTTACAGGAAGTCCCTTGCC	PC Details: [Normalization]	chr7_-_5340026_5343473	ACTB	-	actin, beta
hSQ012541	6908	CACTGAGAACACCGCGCAGCGTGACTGTGAGTTGCTCATACCGTGCTGCTATCTGGGCAGCGCTGCCCAT	PC Details: [Normalization]	chr6_+_170781090_170799578	TBP	GTF2D|GTF2D1|MGC117320|MGC126054|MGC126055|SCA17|TFIID	TATA box binding protein
hSQ021313	3251	CTGTTTATTTGCACTATGAGCCTATAGACTATCAGTTCCCTTTGGGCGGATTGTTGTTTAACTTGTAAAT	PC Details: [Normalization]	chrX_+_133319776_133360216	HPRT1	HGPRT|HPRT	hypoxanthine phosphoribosyltransferase 1 (Lesch-Nyhan syndrome)
hSQ018331	23521	CGGACTCCTGGTCTGAGCCCAATAAAGACTGTTAATTCCTCATGCGTTGCCTGCCCTTCCTCCATTGTTG	PC Details: [Normalization]	chr19_+_54682675_54687374	RPL13A	-	ribosomal protein L13a
hSQ012653	7316	CACTTGGTCCTGCGCTTGAGGGGGGGTGTCTAAGTTTCCCCTTTTAAGGTTTCAACAAATTTCATTGCAC	PC Details: [Normalization]	chr12_-_123921071_123924080	UBC	HMG20	ubiquitin C
hSQ025392	60	GATTGCACATTGTTGTTTTTTTAATAGTCATTCCAAATATGAGATGCATTGTTACAGGAAGTCCCTTGCC	PC Details: [Normalization]	chr7_-_5340026_5343473	ACTB	-	actin, beta
hSQ012541	6908	CACTGAGAACACCGCGCAGCGTGACTGTGAGTTGCTCATACCGTGCTGCTATCTGGGCAGCGCTGCCCAT	PC Details: [Normalization]	chr6_+_170781090_170799578	TBP	GTF2D|GTF2D1|MGC117320|MGC126054|MGC126055|SCA17|TFIID	TATA box binding protein
hSQ021313	3251	CTGTTTATTTGCACTATGAGCCTATAGACTATCAGTTCCCTTTGGGCGGATTGTTGTTTAACTTGTAAAT	PC Details: [Normalization]	chrX_+_133319776_133360216	HPRT1	HGPRT|HPRT	hypoxanthine phosphoribosyltransferase 1 (Lesch-Nyhan syndrome)
hSQ018331	23521	CGGACTCCTGGTCTGAGCCCAATAAAGACTGTTAATTCCTCATGCGTTGCCTGCCCTTCCTCCATTGTTG	PC Details: [Normalization]	chr19_+_54682675_54687374	RPL13A	-	ribosomal protein L13a
hSQ012653	7316	CACTTGGTCCTGCGCTTGAGGGGGGGTGTCTAAGTTTCCCCTTTTAAGGTTTCAACAAATTTCATTGCAC	PC Details: [Normalization]	chr12_-_123921071_123924080	UBC	HMG20	ubiquitin C
hSQ025392	60	GATTGCACATTGTTGTTTTTTTAATAGTCATTCCAAATATGAGATGCATTGTTACAGGAAGTCCCTTGCC	PC Details: [Normalization]	chr7_-_5340026_5343473	ACTB	-	actin, beta
hSQ012541	6908	CACTGAGAACACCGCGCAGCGTGACTGTGAGTTGCTCATACCGTGCTGCTATCTGGGCAGCGCTGCCCAT	PC Details: [Normalization]	chr6_+_170781090_170799578	TBP	GTF2D|GTF2D1|MGC117320|MGC126054|MGC126055|SCA17|TFIID	TATA box binding protein
hSQ021313	3251	CTGTTTATTTGCACTATGAGCCTATAGACTATCAGTTCCCTTTGGGCGGATTGTTGTTTAACTTGTAAAT	PC Details: [Normalization]	chrX_+_133319776_133360216	HPRT1	HGPRT|HPRT	hypoxanthine phosphoribosyltransferase 1 (Lesch-Nyhan syndrome)
hSQ018331	23521	CGGACTCCTGGTCTGAGCCCAATAAAGACTGTTAATTCCTCATGCGTTGCCTGCCCTTCCTCCATTGTTG	PC Details: [Normalization]	chr19_+_54682675_54687374	RPL13A	-	ribosomal protein L13a
hSQ012653	7316	CACTTGGTCCTGCGCTTGAGGGGGGGTGTCTAAGTTTCCCCTTTTAAGGTTTCAACAAATTTCATTGCAC	PC Details: [Normalization]	chr12_-_123921071_123924080	UBC	HMG20	ubiquitin C
hSQ025392	60	GATTGCACATTGTTGTTTTTTTAATAGTCATTCCAAATATGAGATGCATTGTTACAGGAAGTCCCTTGCC	PC Details: [Normalization]	chr7_-_5340026_5343473	ACTB	-	actin, beta
hSQ012541	6908	CACTGAGAACACCGCGCAGCGTGACTGTGAGTTGCTCATACCGTGCTGCTATCTGGGCAGCGCTGCCCAT	PC Details: [Normalization]	chr6_+_170781090_170799578	TBP	GTF2D|GTF2D1|MGC117320|MGC126054|MGC126055|SCA17|TFIID	TATA box binding protein
hSQ021313	3251	CTGTTTATTTGCACTATGAGCCTATAGACTATCAGTTCCCTTTGGGCGGATTGTTGTTTAACTTGTAAAT	PC Details: [Normalization]	chrX_+_133319776_133360216	HPRT1	HGPRT|HPRT	hypoxanthine phosphoribosyltransferase 1 (Lesch-Nyhan syndrome)
hSQ018331	23521	CGGACTCCTGGTCTGAGCCCAATAAAGACTGTTAATTCCTCATGCGTTGCCTGCCCTTCCTCCATTGTTG	PC Details: [Normalization]	chr19_+_54682675_54687374	RPL13A	-	ribosomal protein L13a
hSQ012653	7316	CACTTGGTCCTGCGCTTGAGGGGGGGTGTCTAAGTTTCCCCTTTTAAGGTTTCAACAAATTTCATTGCAC	PC Details: [Normalization]	chr12_-_123921071_123924080	UBC	HMG20	ubiquitin C
hSQ025392	60	GATTGCACATTGTTGTTTTTTTAATAGTCATTCCAAATATGAGATGCATTGTTACAGGAAGTCCCTTGCC	PC Details: [Normalization]	chr7_-_5340026_5343473	ACTB	-	actin, beta
hSQ012541	6908	CACTGAGAACACCGCGCAGCGTGACTGTGAGTTGCTCATACCGTGCTGCTATCTGGGCAGCGCTGCCCAT	PC Details: [Normalization]	chr6_+_170781090_170799578	TBP	GTF2D|GTF2D1|MGC117320|MGC126054|MGC126055|SCA17|TFIID	TATA box binding protein
hSQ021313	3251	CTGTTTATTTGCACTATGAGCCTATAGACTATCAGTTCCCTTTGGGCGGATTGTTGTTTAACTTGTAAAT	PC Details: [Normalization]	chrX_+_133319776_133360216	HPRT1	HGPRT|HPRT	hypoxanthine phosphoribosyltransferase 1 (Lesch-Nyhan syndrome)
hSQ005098	1509	ACTCTGGATCCTGGGCGACGTCTTCATCGGCCGCTACTACACTGTGTTTGACCGTGACAACAACAGGGTG	PC Details: [Tiling]	chr11_-_1447263_1742077	CTSD	CPSD|MGC2311	cathepsin D (lysosomal aspartyl peptidase)
hSQ013022	6185	CAGCAGATACCTGGTGAGCTCAGATAGTCTCTTTCTCTGACACTGTGTAAGAAGCTGTGAATATTCCTAA	PC Details: [Tiling]	chr20_+_35240887_35303437	RPN2	RIBIIR|RPN-II|RPNII|SWP1	ribophorin II
hSQ016620	7094	CCGGCAGCAGCAGTACAAGTTTCTGCCTTCAGAGCTTCGAGATGAGCACTAAAGAAGCCTCTTCTATTTA	PC Details: [Tiling]	chr9_-_35687333_35722367	TLN1	ILWEQ|KIAA1027|TLN	talin 1
hSQ017325	1509	CCTGCCCGCGATCACACTGAAGCTGGGAGGCAAAGGCTACAAGCTGTCCCCAGAGGACTACACGCTCAAG	PC Details: [Tiling]	chr11_-_1447263_1742077	CTSD	CPSD|MGC2311	cathepsin D (lysosomal aspartyl peptidase)
hSQ036273	6185	TATGCTGGGACTCATGTATGTCTACTGGACTCAGCTCAACATGTTCCAGACCTTGAAGTACCTGGCCATC	PC Details: [Tiling]	chr20_+_35240887_35303437	RPN2	RIBIIR|RPN-II|RPNII|SWP1	ribophorin II
hSQ041087	7094	TGGCAACGCAGTGAAGCGAGCCTCAGATAATCTGGTGAAAGCAGCACAGAAGGCTGCAGCCTTTGAAGAG	PC Details: [Tiling]	chr9_-_35687333_35722367	TLN1	ILWEQ|KIAA1027|TLN	talin 1
hSQ010931	1509	ATTGTGGACACAGGCACTTCCCTCATGGTGGGCCCGGTGGATGAGGTGCGCGAGCTGCAGAAGGCCATCG	PC Details: [Tiling]	chr11_-_1447263_1742077	CTSD	CPSD|MGC2311	cathepsin D (lysosomal aspartyl peptidase)
hSQ016615	6185	CCGGATTGGTGCCAATGTCTCCAACTTCACTTTTGCTCCTAGCACGATTATATTTCACCTGGGACATGCT	PC Details: [Tiling]	chr20_+_35240887_35303437	RPN2	RIBIIR|RPN-II|RPNII|SWP1	ribophorin II
hSQ009397	2934	ATCGAAGAGGTTCCTGGTGAGCTCATGCAGGAAGACCTGGCAACGGATGACGTCATGCTTCTGGACACCT	PC Details: [Tiling]	chr9_+_121043314_121174675	GSN	DKFZp313L0718	gelsolin (amyloidosis, Finnish type)
hSQ013948	1938	CATCCTCACCGACATCACCAAGGGTGTGCAGTACCTCAACGAGATCAAGGACAGTGTGGTGGCCGGCTTC	PC Details: [Tiling]	chr19_-_3927054_3936446	EEF2	EEF-2|EF2	eukaryotic translation elongation factor 2
hSQ032750	7431	GTCCCTGGAACGCCAGATGCGTGAAATGGAAGAGAACTTTGCCGTTGAAGCTGCTAACTACCAAGACACT	PC Details: [Tiling]	chr10_+_17310475_17319598	VIM	FLJ36605	vimentin
hSQ002322	2934	AAGGCTGCCTACCGCACATCCCCACGGCTGAAGGACAAGAAGATGGATGCCCATCCTCCTCGCCTCTTTG	PC Details: [Tiling]	chr9_+_121043314_121174675	GSN	DKFZp313L0718	gelsolin (amyloidosis, Finnish type)
hSQ030085	1938	GGCGCCGGCGAGCTGCACCTGGAGATCTGCCTGAAGGACCTGGAGGAGGACCACGCCTGCATCCCCATCA	PC Details: [Tiling]	chr19_-_3927054_3936446	EEF2	EEF-2|EF2	eukaryotic translation elongation factor 2
hSQ006512	7431	AGCAGGAGTCCACTGAGTACCGGAGACAGGTGCAGTCCCTCACCTGTGAAGTGGATGCCCTTAAAGGAAC	PC Details: [Tiling]	chr10_+_17310475_17319598	VIM	FLJ36605	vimentin
hSQ036435	2934	TATTGCCTAAGGCTGGTGCACTGAACTCCAACGATGCCTTTGTTCTGAAAACCCCCTCAGCCGCCTACCT	PC Details: [Tiling]	chr9_+_121043314_121174675	GSN	DKFZp313L0718	gelsolin (amyloidosis, Finnish type)
hSQ025739	1938	GCACCATCACCACCTTCGAGCACGCGCACAACATGCGGGTGATGAAGTTCAGCGTCAGCCCTGTTGTCAG	PC Details: [Tiling]	chr19_-_3927054_3936446	EEF2	EEF-2|EF2	eukaryotic translation elongation factor 2
hSQ042466	7431	TGTTTCCAAGCCTGACCTCACGGCTGCCCTGCGTGACGTACGTCAGCAATATGAAAGTGTGGCTGCCAAG	PC Details: [Tiling]	chr10_+_17310475_17319598	VIM	FLJ36605	vimentin
hSQ035520	1509	TACTACGGGGAGATTGGCATCGGGACGCCCCCCCAGTGCTTCACAGTCGTCTTCGACACGGGCTCCTCCA	PC Details: [Tiling]	chr11_-_1447263_1742077	CTSD	CPSD|MGC2311	cathepsin D (lysosomal aspartyl peptidase)
hSQ014767	6185	CCACCAGAACTTCGCCTTGTTCTTCCAGCTGGTAGATGTGAACACTGGTGCTGAACTCACTCCTCACCAG	PC Details: [Tiling]	chr20_+_35240887_35303437	RPN2	RIBIIR|RPN-II|RPNII|SWP1	ribophorin II
hSQ031522	5430	GGTGACGACTTGAACTGCATCTTTAATGATGACAATGCAGAGAAGCTGGTGCTCCGTATTCGCATCATGA	PC Details: [Tiling]	chr17_+_7328421_7358653	POLR2A	MGC75453|POLR2|POLRA|RPB1|RPBh1|RPO2|RPOL2|RpIILS|hRPB220|hsRPB1	polymerase (RNA) II (DNA directed) polypeptide A, 220kDa
hSQ012900	6185	CAGAGTCAAGATCTCCACTGAAGTTGGCATCACAAATGTTGATCTTTCCACCGTGGATAAGGATCAGAGC	PC Details: [Tiling]	chr20_+_35240887_35303437	RPN2	RIBIIR|RPN-II|RPNII|SWP1	ribophorin II
hSQ038868	5430	TCTGTGCCGTCTGGAGCATACAACGTTGAGGAAGGTGACTGCCAACACAGCCATCTACTATGACCCCAAC	PC Details: [Tiling]	chr17_+_7328421_7358653	POLR2A	MGC75453|POLR2|POLRA|RPB1|RPBh1|RPO2|RPOL2|RpIILS|hRPB220|hsRPB1	polymerase (RNA) II (DNA directed) polypeptide A, 220kDa
hSQ043383	6185	TTCCAGTGGTTATTATGACTTCCTTGTCGAAGTTGAAGGTGACAACCGGTATATTGCAAATACCGTAGAG	PC Details: [Tiling]	chr20_+_35240887_35303437	RPN2	RIBIIR|RPN-II|RPNII|SWP1	ribophorin II
hSQ041518	5430	TGGGTGTGCCCCGACTTAAGGAGCTCATCAACATTTCCAAGAAGCCAAAGACTCCTTCGCTTACTGTCTT	PC Details: [Tiling]	chr17_+_7328421_7358653	POLR2A	MGC75453|POLR2|POLRA|RPB1|RPBh1|RPO2|RPOL2|RpIILS|hRPB220|hsRPB1	polymerase (RNA) II (DNA directed) polypeptide A, 220kDa
hSQ005481	60	ACTTTGATTGCACATTGTTGTTTTTTTAATAGTCATTCCAAATATGAGATGCGTTGTTACAGGAAGTCCC	PC Details: [Tiling]	chr7_-_5340026_5343473	ACTB	-	actin, beta
hSQ039683	4035	TGAGGGCTAATTCTGGGAAGGGAGAGTTCTTTGCTGCCCCTGTCTGGAAGACGTGGCTCTGGGTGAGGTA	PC Details: [Tiling]	chr12_+_55808542_55893390	LRP1	A2MR|APOER|APR|CD91|LRP|MGC88725|TGFBR5	low density lipoprotein-related protein 1 (alpha-2-macroglobulin receptor)
hSQ010853	6435	ATTGCTGTCCCAAGGAATCCAGAGGAAAATGAGGCCATTGCAAGCTTCGTGAAGAAGTACAACACATATG	PC Details: [Tiling]	chr10_-_81307110_81307179	SFTPA1	COLEC4|PSAP|PSPA|SFTP1|SP-A|SP-A1	surfactant, pulmonary-associated protein A1
hSQ032143	60	GTACCCTGGCATTGCCGACAGGATGCAGAAGGAGATCACTGCCCTGGCACCCAGCACAATGAAGATCAAG	PC Details: [Tiling]	chr7_-_5340026_5343473	ACTB	-	actin, beta
hSQ013008	4035	CAGCACCAACGGATGACCAACGGGGCCATGAACGTGGAGATTGGAAACCCCACCTACAAGATGTACGAAG	PC Details: [Tiling]	chr12_+_55808542_55893390	LRP1	A2MR|APOER|APR|CD91|LRP|MGC88725|TGFBR5	low density lipoprotein-related protein 1 (alpha-2-macroglobulin receptor)
hSQ043372	6435	TTCCAGCTCATCTAGATGAGGAGCTCCAAGCCACACTCCACGACTTTAGACATCAAATCCTGCAGACAAG	PC Details: [Tiling]	chr10_+_81040706_81365127	SFTPA1	COLEC4|PSAP|PSPA|SFTP1|SP-A|SP-A1	surfactant, pulmonary-associated protein A1
hSQ044211	60	TTGCTATCCAGGCTGTGCTATCCCTGTACGCCTCTGGCCGTACCACTGGCATCGTGATGGACTCCGGTGA	PC Details: [Tiling]	chr7_-_5340026_5343473	ACTB	-	actin, beta
hSQ035092	4035	TAATCCCTCTGCTGTTGCTGCTGCTGCTGGTTCTGGTGGCCGGAGTGGTATTCTGGTATAAGCGGCGAGT	PC Details: [Tiling]	chr12_+_55808542_55893390	LRP1	A2MR|APOER|APR|CD91|LRP|MGC88725|TGFBR5	low density lipoprotein-related protein 1 (alpha-2-macroglobulin receptor)
hSQ002983	7094	AATGCAGCTGTACAAGGCCATGCCAGCCAGGAGAAGCTCATCTCATCAGCCAAGCAGGTAGCTGCCTCCA	PC Details: [Tiling]	chr9_-_35687333_35722367	TLN1	ILWEQ|KIAA1027|TLN	talin 1
hSQ020977	1509	CTGGGTGGCACAGACTCCAAGTATTACAAGGGTTCTCTGTCCTACCTGAATGTCACCCGCAAGGCCTACT	PC Details: [Tiling]	chr11_-_1447263_1742077	CTSD	CPSD|MGC2311	cathepsin D (lysosomal aspartyl peptidase)
hSQ007529	6185	AGGCCCCCCACCGTGGTGTCCAATACATTCACTGCCCTGATCCTCTCGCCGTTGCTTCTGCTCTTCGCTC	PC Details: [Tiling]	chr20_+_35240887_35303437	RPN2	RIBIIR|RPN-II|RPNII|SWP1	ribophorin II
hSQ024738	7094	GAGTGTGGTGGGTGCCATTCCAGCCAATGCACTGGACGATGGGCAGTGGTCCCAGGGCCTCATTTCTGCT	PC Details: [Tiling]	chr9_-_35687333_35722367	TLN1	ILWEQ|KIAA1027|TLN	talin 1
hSQ041381	1509	TGGGCATGGCCTACCCCCGCATCTCCGTCAACAACGTGCTGCCCGTCTTCGACAACCTGATGCAGCAGAA	PC Details: [Tiling]	chr11_-_1447263_1742077	CTSD	CPSD|MGC2311	cathepsin D (lysosomal aspartyl peptidase)
hSQ037104	6185	TCATCAAGTTCCCTGAGGAAGAAGCTCCCTCGACTGTCTTGTCCCAGAACCTTTTCACTCCAAAACAGGA	PC Details: [Tiling]	chr20_+_35240887_35303437	RPN2	RIBIIR|RPN-II|RPNII|SWP1	ribophorin II
hSQ007473	7094	AGGCAGATGAGTCCTTGAACTTTGAGGAGCAGATACTAGAAGCTGCCAAGTCCATTGCAGCAGCCACCAG	PC Details: [Tiling]	chr9_-_35687333_35722367	TLN1	ILWEQ|KIAA1027|TLN	talin 1
hSQ007984	1509	AGTACAACAGCGACAAGTCCAGCACCTACGTGAAGAATGGTACCTCGTTTGACATCCACTATGGCTCGGG	PC Details: [Tiling]	chr11_-_1447263_1742077	CTSD	CPSD|MGC2311	cathepsin D (lysosomal aspartyl peptidase)
hSQ007227	6185	AGGAAGTGGTGTTTGTTGCCGAGCCAGACAACAAGAACGTGTACAAGTTTGAACTGGATACCTCTGAAAG	PC Details: [Tiling]	chr20_+_35240887_35303437	RPN2	RIBIIR|RPN-II|RPNII|SWP1	ribophorin II
hSQ024584	5430	GAGGTGGTGGACAAGATGGATGATGATGTCTTCCTGCGCTGCATCGAGTCCAACATGCTGACAGATATGA	PC Details: [Tiling]	chr17_+_7328421_7358653	POLR2A	MGC75453|POLR2|POLRA|RPB1|RPBh1|RPO2|RPOL2|RpIILS|hRPB220|hsRPB1	polymerase (RNA) II (DNA directed) polypeptide A, 220kDa
hSQ013043	4035	CAGCAGGTGTGTGCGGGCTACTGTGCCAACAACAGCACCTGCACTGTCAACCAGGGCAACCAGCCCCAGT	PC Details: [Tiling]	chr12_+_55808542_55893390	LRP1	A2MR|APOER|APR|CD91|LRP|MGC88725|TGFBR5	low density lipoprotein-related protein 1 (alpha-2-macroglobulin receptor)
hSQ013432	2934	CAGGGTGCCCAGTCTACCCAGGATGAGGTCGCTGCATCTGCCATCCTGACTGCTCAGCTGGATGAGGAGC	PC Details: [Tiling]	chr9_+_121043314_121174675	GSN	DKFZp313L0718	gelsolin (amyloidosis, Finnish type)
hSQ020765	4035	CTGGAACCTGTAACCTGCAGTGCTTCAACGGTGGCAGCTGTTTCCTCAATGCACGGAGGCAGCCCAAGTG	PC Details: [Tiling]	chr12_+_55808542_55893390	LRP1	A2MR|APOER|APR|CD91|LRP|MGC88725|TGFBR5	low density lipoprotein-related protein 1 (alpha-2-macroglobulin receptor)
hSQ004374	2934	ACCCTGCCACATATGGACAGTTCTATGGAGGCGACAGCTACATCATTCTGTACAACTACCGCCATGGTGG	PC Details: [Tiling]	chr9_+_121043314_121174675	GSN	DKFZp313L0718	gelsolin (amyloidosis, Finnish type)
hSQ039591	4035	TGAGCCCCAGTGGGCCTGTCTGCACCTGTCCCAATGGGAAGCGGCTGGACAACGGCACATGCGTGCCTGT	PC Details: [Tiling]	chr12_+_55808542_55893390	LRP1	A2MR|APOER|APR|CD91|LRP|MGC88725|TGFBR5	low density lipoprotein-related protein 1 (alpha-2-macroglobulin receptor)
hSQ018593	2934	CGGTGAGACCCCACTGTTCAAGCAGTTCTTCAAGAACTGGCGGGACCCAGACCAGACAGATGGCCTGGGC	PC Details: [Tiling]	chr9_+_121043314_121174675	GSN	DKFZp313L0718	gelsolin (amyloidosis, Finnish type)
hSQ000969	5430	AAATGCCTTGTGGCAGAGCTCCCGGTGAACTTCTGGATCCCGTTTCTGATGCAGACTCTTGTCTTGTTCT	PC Details: [Tiling]	chr17_+_7328421_7358653	POLR2A	MGC75453|POLR2|POLRA|RPB1|RPBh1|RPO2|RPOL2|RpIILS|hRPB220|hsRPB1	polymerase (RNA) II (DNA directed) polypeptide A, 220kDa
hSQ040239	2597	TGCCATGTAGACCCCTTGAAGAGGGGAGGGGCCTAGGGAGCCGCACCTTGTCATGTACCATCAATAAAGT	PC Details: [Tiling]	chr12_+_6513917_6517798	GAPDH	G3PD|GAPD|MGC88685	glyceraldehyde-3-phosphate dehydrogenase
hSQ010853	6435	ATTGCTGTCCCAAGGAATCCAGAGGAAAATGAGGCCATTGCAAGCTTCGTGAAGAAGTACAACACATATG	PC Details: [Tiling]	chr10_-_81307110_81307179	SFTPA1	COLEC4|PSAP|PSPA|SFTP1|SP-A|SP-A1	surfactant, pulmonary-associated protein A1
hSQ026940	5430	GCCGGCTTCTCTCCCAGTGCTGCGTCAGATGCCAGCGGCTTCAGCCCAGGTTACTCCCCTGCCTGGTCTC	PC Details: [Tiling]	chr17_+_7328421_7358653	POLR2A	MGC75453|POLR2|POLRA|RPB1|RPBh1|RPO2|RPOL2|RpIILS|hRPB220|hsRPB1	polymerase (RNA) II (DNA directed) polypeptide A, 220kDa
hSQ019011	2597	CTACACTGAGCACCAGGTGGTCTCCTCTGACTTCAACAGCGACACCCACTCCTCCACCTTTGACGCTGGG	PC Details: [Tiling]	chr12_+_6513917_6517798	GAPDH	G3PD|GAPD|MGC88685	glyceraldehyde-3-phosphate dehydrogenase
hSQ043372	6435	TTCCAGCTCATCTAGATGAGGAGCTCCAAGCCACACTCCACGACTTTAGACATCAAATCCTGCAGACAAG	PC Details: [Tiling]	chr10_+_81040706_81365127	SFTPA1	COLEC4|PSAP|PSPA|SFTP1|SP-A|SP-A1	surfactant, pulmonary-associated protein A1
hSQ002891	5430	AATCTCTCCTGCCATGACACCTTGGAACCAGGGTGCAACCCCTGCCTATGGCGCCTGGTCCCCCAGTGTT	PC Details: [Tiling]	chr17_+_7328421_7358653	POLR2A	MGC75453|POLR2|POLRA|RPB1|RPBh1|RPO2|RPOL2|RpIILS|hRPB220|hsRPB1	polymerase (RNA) II (DNA directed) polypeptide A, 220kDa
hSQ011850	2597	CAATGCCTCCTGCACCACCAACTGCTTAGCACCCCTGGCCAAGGTCATCCATGACAACTTTGGTATCGTG	PC Details: [Tiling]	chr12_+_6513917_6517798	GAPDH	G3PD|GAPD|MGC88685	glyceraldehyde-3-phosphate dehydrogenase
hSQ000967	6435	AAATGCCATGTCCTCCTGGAAATGATGGGCTGCCTGGAGCCCCTGGTATCCCTGGAGAGTGTGGAGAGAA	PC Details: [Tiling]	chr10_+_81040706_81365127	SFTPA1	COLEC4|PSAP|PSPA|SFTP1|SP-A|SP-A1	surfactant, pulmonary-associated protein A1
hSQ038053	60	TCGAGCACGGCATCGTCACCAACTGGGACGACATGGAGAAAATCTGGCACCACACCTTCTACAATGAGCT	PC Details: [Tiling]	chr7_-_5340026_5343473	ACTB	-	actin, beta
hSQ029426	4035	GGATCGTGCCCACCCCACATGACAGGGCCCCGGTGTGAGGAGCACGTCTTCAGCCAGCAGCAGCCAGGAC	PC Details: [Tiling]	chr12_+_55808542_55893390	LRP1	A2MR|APOER|APR|CD91|LRP|MGC88725|TGFBR5	low density lipoprotein-related protein 1 (alpha-2-macroglobulin receptor)
hSQ004515	6435	ACCTCATCTTGATGGCAGCCTCTGGTGCTGTGTGCGAAGTGAAGGACGTTTGTGTTGGAAGCCCTGGTAT	PC Details: [Tiling]	chr10_+_81040706_81365127	SFTPA1	COLEC4|PSAP|PSPA|SFTP1|SP-A|SP-A1	surfactant, pulmonary-associated protein A1
hSQ039833	60	TGATGATATCGCCGCGCTCGTCGTCGACAACGGCTCCGGCATGTGCAAGGCCGGCTTCGCGGGCGACGAT	PC Details: [Tiling]	chr7_-_5340026_5343473	ACTB	-	actin, beta
hSQ039451	4035	TGACCTGCGTCGGCCACTGCAGCAATGGCGGCTCCTGTACCATGAACAGCAAAATGATGCCTGAGTGCCA	PC Details: [Tiling]	chr12_+_55808542_55893390	LRP1	A2MR|APOER|APR|CD91|LRP|MGC88725|TGFBR5	low density lipoprotein-related protein 1 (alpha-2-macroglobulin receptor)
hSQ032843	6435	GTCGCTGATTTCTTGGAGCCTGAAAAGAAAGTAACACAGCAGGGATGAGGACAGATGGTGTGAGTCAGTG	PC Details: [Tiling]	chr10_+_81040706_81365127	SFTPA1	COLEC4|PSAP|PSPA|SFTP1|SP-A|SP-A1	surfactant, pulmonary-associated protein A1
hSQ037622	60	TCCCGCGTCCGCCCCGCGAGCACAGAGCCTCGCCTTTGCCGATCCGCCGCCCGTCCACACCCGCCGCCAG	PC Details: [Tiling]	chr7_-_5340026_5343473	ACTB	-	actin, beta
hSQ028011	4035	GCTGATGGCTCCCGACAATGCCGCTGCACTGCCTACTTTGAGGGATCGAGGTGTGAGGTGAACAAGTGCA	PC Details: [Tiling]	chr12_+_55808542_55893390	LRP1	A2MR|APOER|APR|CD91|LRP|MGC88725|TGFBR5	low density lipoprotein-related protein 1 (alpha-2-macroglobulin receptor)
hSQ002273	2934	AAGGCAAGGAGCCCGCCCACCTCATGAGCCTGTTTGGTGGGAAGCCCATGATCATCTACAAGGGCGGCAC	PC Details: [Tiling]	chr9_+_121043314_121174675	GSN	DKFZp313L0718	gelsolin (amyloidosis, Finnish type)
hSQ015187	2597	CCAGGGCTGCTTTTAACTCTGGTAAAGTGGATATTGTTGCCATCAATGACCCCTTCATTGACCTCAACTA	PC Details: [Tiling]	chr12_+_6513917_6517798	GAPDH	G3PD|GAPD|MGC88685	glyceraldehyde-3-phosphate dehydrogenase
hSQ005655	7094	AGAACTGAAGCAGCAGTTGACAGGACATTCAAAGCGTGTGGCTGGTTCCGTCACTGAGCTCATCCAGGCT	PC Details: [Tiling]	chr9_-_35687333_35722367	TLN1	ILWEQ|KIAA1027|TLN	talin 1
hSQ016208	1938	CCCTCCCCTGTGACGGCCCAGAAGTACCGCTGCGAGCTCCTGTACGAGGGGCCCCCGGACGACGAGGCTG	PC Details: [Tiling]	chr19_-_3927054_3936446	EEF2	EEF-2|EF2	eukaryotic translation elongation factor 2
hSQ005746	7094	AGAAGTGGCCCCTGATGTGCGGCTTCGAGCCCTGCACTATGGCCGGGAGTGTGCCAATGGCTACCTGGAA	PC Details: [Tiling]	chr9_-_35687333_35722367	TLN1	ILWEQ|KIAA1027|TLN	talin 1
hSQ003260	1938	AATTTCAAGAAAGAGGAGACAGCAAAACTGATAGAGAAACTGGACATCAAACTGGACAGCGAGGACAAGG	PC Details: [Tiling]	chr19_-_3927054_3936446	EEF2	EEF-2|EF2	eukaryotic translation elongation factor 2
hSQ003186	7094	AATTCCTGTCGCCAGGAAGATGTCATTGCCACAGCCAATCTGAGCCGCCGTGCTATTGCAGATATGCTTC	PC Details: [Tiling]	chr9_-_35687333_35722367	TLN1	ILWEQ|KIAA1027|TLN	talin 1
hSQ004329	2934	ACCCGAGGCCGCGGCTGCCGACTGGGTCCCCTGCCGCTGTCGCCACCATGGCTCCGCACCGCCCCGCGCC	PC Details: [Tiling]	chr9_+_121043314_121174675	GSN	DKFZp313L0718	gelsolin (amyloidosis, Finnish type)
hSQ014486	1938	CCAAACTAATTTTAACAAACGCATTAAGAGGTTTATTTGGGTACATGGCCCGCAGTGGCTTTTGCCCCAG	PC Details: [Tiling]	chr19_-_3927054_3936446	EEF2	EEF-2|EF2	eukaryotic translation elongation factor 2
hSQ027859	7431	GCTCTAGTTCTTAACAACCGACACTCCTACAAGATTTAGAAAAAAGTTTACAACATAATCTAGTTTACAG	PC Details: [Tiling]	chr10_+_17310475_17319598	VIM	FLJ36605	vimentin
hSQ026846	2934	GCCCTGCAAAAATTCAGAGTCCTTGCAAAATTGTCTAAAATGTCAGTGTTTGGGAAATTAAATCCAATAA	PC Details: [Tiling]	chr9_+_121043314_121174675	GSN	DKFZp313L0718	gelsolin (amyloidosis, Finnish type)
hSQ006526	1938	AGCAGGTGGTCGGTGGCATCTACGGGGTTTTGAACAGGAAGCGGGGCCACGTGTTCGAGGAGTCCCAGGT	PC Details: [Tiling]	chr19_-_3927054_3936446	EEF2	EEF-2|EF2	eukaryotic translation elongation factor 2
hSQ005039	7431	ACTCCCTCTGGTTGATACCCACTCAAAAAGGACACTTCTGATTAAGACGGTTGAAACTAGAGATGGACAG	PC Details: [Tiling]	chr10_+_17310475_17319598	VIM	FLJ36605	vimentin
hSQ008587	2934	ATAACAATTGTCTTTGTCTGGGTTGGAAAGGATTCTCAAGAAGAAGAAAAGACAGAAGCCTTGACTTCTG	PC Details: [Tiling]	chr9_+_121043314_121174675	GSN	DKFZp313L0718	gelsolin (amyloidosis, Finnish type)
hSQ042162	1938	TGTGCGCTTCGACGTCCACGACGTCACCCTGCACGCCGACGCCATCCACCGCGGAGGGGGCCAGATCATC	PC Details: [Tiling]	chr19_-_3927054_3936446	EEF2	EEF-2|EF2	eukaryotic translation elongation factor 2
hSQ000967	6435	AAATGCCATGTCCTCCTGGAAATGATGGGCTGCCTGGAGCCCCTGGTATCCCTGGAGAGTGTGGAGAGAA	PC Details: [Tiling]	chr10_+_81040706_81365127	SFTPA1	COLEC4|PSAP|PSPA|SFTP1|SP-A|SP-A1	surfactant, pulmonary-associated protein A1
hSQ045047	5430	TTTGACCTCCTGCTTGATGCAGAGAAGTGCAAGTATGGCATGGAGATCCCCACCAATATCCCCGGCCTGG	PC Details: [Tiling]	chr17_+_7328421_7358653	POLR2A	MGC75453|POLR2|POLRA|RPB1|RPBh1|RPO2|RPOL2|RpIILS|hRPB220|hsRPB1	polymerase (RNA) II (DNA directed) polypeptide A, 220kDa
hSQ038742	2597	TCTGCTGATGCCCCCATGTTCGTCATGGGTGTGAACCATGAGAAGTATGACAACAGCCTCAAGATCATCA	PC Details: [Tiling]	chr12_+_6513917_6517798	GAPDH	G3PD|GAPD|MGC88685	glyceraldehyde-3-phosphate dehydrogenase
hSQ004515	6435	ACCTCATCTTGATGGCAGCCTCTGGTGCTGTGTGCGAAGTGAAGGACGTTTGTGTTGGAAGCCCTGGTAT	PC Details: [Tiling]	chr10_+_81040706_81365127	SFTPA1	COLEC4|PSAP|PSPA|SFTP1|SP-A|SP-A1	surfactant, pulmonary-associated protein A1
hSQ044099	5430	TTGATGGCTCCTATGTCAATTACCGACACTTGGCTCTCTTGTGTGATACCATGACCTGTCGTGGCCACTT	PC Details: [Tiling]	chr17_+_7328421_7358653	POLR2A	MGC75453|POLR2|POLRA|RPB1|RPBh1|RPO2|RPOL2|RpIILS|hRPB220|hsRPB1	polymerase (RNA) II (DNA directed) polypeptide A, 220kDa
hSQ000891	2597	AAATCAAGTGGGGCGATGCTGGCGCTGAGTACGTCGTGGAGTCCACTGGCGTCTTCACCACCATGGAGAA	PC Details: [Tiling]	chr12_+_6513917_6517798	GAPDH	G3PD|GAPD|MGC88685	glyceraldehyde-3-phosphate dehydrogenase
hSQ032843	6435	GTCGCTGATTTCTTGGAGCCTGAAAAGAAAGTAACACAGCAGGGATGAGGACAGATGGTGTGAGTCAGTG	PC Details: [Tiling]	chr10_+_81040706_81365127	SFTPA1	COLEC4|PSAP|PSPA|SFTP1|SP-A|SP-A1	surfactant, pulmonary-associated protein A1
hSQ014094	5430	CATGCACTTGCCACAGACAGACAACAAGAAGAAGATCATCATCACGGAGGATGGGGAATTCAAGGCCCTG	PC Details: [Tiling]	chr17_+_7328421_7358653	POLR2A	MGC75453|POLR2|POLRA|RPB1|RPBh1|RPO2|RPOL2|RpIILS|hRPB220|hsRPB1	polymerase (RNA) II (DNA directed) polypeptide A, 220kDa
hSQ034407	2597	GTTTACATGTTCCAATATGATTCCACCCATGGCAAATTCCATGGCACCGTCAAGGCTGAGAACGGGAAGC	PC Details: [Tiling]	chr12_+_6513917_6517798	GAPDH	G3PD|GAPD|MGC88685	glyceraldehyde-3-phosphate dehydrogenase
hSQ023559	7094	GACCCCACAGTCATTGCTGAGAATGAGCTCCTGGGAGCTGCAGCCGCCATTGAGGCTGCAGCCAAAAAGC	PC Details: [Tiling]	chr9_-_35687333_35722367	TLN1	ILWEQ|KIAA1027|TLN	talin 1
hSQ002298	1938	AAGGCCCTCTTATGATGTATATTTCCAAAATGGTGCCAACCTCCGACAAAGGTCGGTTCTACGCCTTTGG	PC Details: [Tiling]	chr19_-_3927054_3936446	EEF2	EEF-2|EF2	eukaryotic translation elongation factor 2
hSQ042398	7431	TGTTGACAATGCGTCTCTGGCACGTCTTGACCTTGAACGCAAAGTGGAATCTTTGCAAGAAGAGATTGCC	PC Details: [Tiling]	chr10_+_17310475_17319598	VIM	FLJ36605	vimentin
hSQ013941	1509	CATCCGCCGGACCATGTCGGAGGTTGGGGGCTCTGTGGAGGACCTGATTGCCAAAGGCCCCGTCTCAAAG	PC Details: [Tiling]	chr11_-_1447263_1742077	CTSD	CPSD|MGC2311	cathepsin D (lysosomal aspartyl peptidase)
hSQ038151	7431	TCGGATATTATTGCAGGAGGAGATGCTTCAGAGAGAGGAAGCCGAAAACACCCTGCAATCTTTCAGACAG	PC Details: [Tiling]	chr10_+_17310475_17319598	VIM	FLJ36605	vimentin
hSQ018567	1509	CGGGTGCAAACACGCGGGTCAGCTGATCCGGCCCAACTGCGGCGTCATCCCGGCTATAAGCGCACGGCCT	PC Details: [Tiling]	chr11_-_1447263_1742077	CTSD	CPSD|MGC2311	cathepsin D (lysosomal aspartyl peptidase)
hSQ041204	7431	TGGCCGAGCTCGAGCAGCTCAAGGGCCAAGGCAAGTCGCGCCTGGGGGACCTCTACGAGGAGGAGATGCG	PC Details: [Tiling]	chr10_+_17310475_17319598	VIM	FLJ36605	vimentin
hSQ014665	7094	CCAATGTGACATCATTGCTTAAGACAGTAAAAGCCGTGGAAGATGAGGCCACCAAAGGCACTCGGGCCCT	PC Details: [Tiling]	chr9_-_35687333_35722367	TLN1	ILWEQ|KIAA1027|TLN	talin 1
hSQ025891	4035	GCAGACGCCAAGCTTTCAGTCATCGGCAGCATCCGGCTCAATGGCACGGACCCCATTGTGGCTGCTGACA	PC Details: [Tiling]	chr12_+_55808542_55893390	LRP1	A2MR|APOER|APR|CD91|LRP|MGC88725|TGFBR5	low density lipoprotein-related protein 1 (alpha-2-macroglobulin receptor)
hSQ037607	5430	TCCCCTGTAACCTGCTGCGGATGATCTGGAATGCTCAGAAAATCTTCCACATCAACCCACGCCTTCCCTC	PC Details: [Tiling]	chr17_+_7328421_7358653	POLR2A	MGC75453|POLR2|POLRA|RPB1|RPBh1|RPO2|RPOL2|RpIILS|hRPB220|hsRPB1	polymerase (RNA) II (DNA directed) polypeptide A, 220kDa
hSQ041352	7094	TGGGAGCCAGGAGAAGTTGGCGCAGGCTGCCCAGTCCTCCGTGGCGACCATCACCCGCCTCGCTGATGTG	PC Details: [Tiling]	chr9_-_35687333_35722367	TLN1	ILWEQ|KIAA1027|TLN	talin 1
hSQ022383	4035	GAAACGTGTACTGGACCGACTCGGGCCGAGATGTGATTGAGGTGGCGCAGATGAAGGGCGAGAACCGCAA	PC Details: [Tiling]	chr12_+_55808542_55893390	LRP1	A2MR|APOER|APR|CD91|LRP|MGC88725|TGFBR5	low density lipoprotein-related protein 1 (alpha-2-macroglobulin receptor)
hSQ006896	5430	AGCGGCGGCTGATCAAGTCCATGGAGTCAGTGATGGTGAAGTACGACGCGACTGTGCGGAACTCCATCAA	PC Details: [Tiling]	chr17_+_7328421_7358653	POLR2A	MGC75453|POLR2|POLRA|RPB1|RPBh1|RPO2|RPOL2|RpIILS|hRPB220|hsRPB1	polymerase (RNA) II (DNA directed) polypeptide A, 220kDa
hSQ007933	7094	AGGTTCCCATATCAAACACCGGGTACAGGAGCTGGGCCATGGCTGTGCCGCTCTGGTCACCAAGGCAGGC	PC Details: [Tiling]	chr9_-_35687333_35722367	TLN1	ILWEQ|KIAA1027|TLN	talin 1
hSQ013214	4035	CAGCTCTGCAACAACACCAAGGGCGGCCACCTCTGCAGCTGCGCTCGGAACTTCATGAAGACGCACAACA	PC Details: [Tiling]	chr12_+_55808542_55893390	LRP1	A2MR|APOER|APR|CD91|LRP|MGC88725|TGFBR5	low density lipoprotein-related protein 1 (alpha-2-macroglobulin receptor)
hSQ020085	5430	CTCTGCTCAGAAATCCCTGTCTGAATACAATAACTTCAAGTCTATGGTCGTGTCCGGAGCTAAAGGTTCC	PC Details: [Tiling]	chr17_+_7328421_7358653	POLR2A	MGC75453|POLR2|POLRA|RPB1|RPBh1|RPO2|RPOL2|RpIILS|hRPB220|hsRPB1	polymerase (RNA) II (DNA directed) polypeptide A, 220kDa
hSQ017940	2934	CGACGCCTACGTCATCCTGAAGACAGTGCAGCTGAGGAACGGAAATCTGCAGTATGACCTCCACTACTGG	PC Details: [Tiling]	chr9_+_121043314_121174675	GSN	DKFZp313L0718	gelsolin (amyloidosis, Finnish type)
hSQ024501	7094	GAGGCTGTGCAGATGATGACCGAGGCCGTAGAGGACCTGACAACAACCCTCAACGAGGCAGCCAGTGCTG	PC Details: [Tiling]	chr9_-_35687333_35722367	TLN1	ILWEQ|KIAA1027|TLN	talin 1
hSQ016270	7094	CCCTGAGCCACCCGCAGCAGATGGCACTCCTGGACCAGACTAAAACATTGGCAGAGTCTGCCCTGCAGTT	PC Details: [Tiling]	chr9_-_35687333_35722367	TLN1	ILWEQ|KIAA1027|TLN	talin 1
hSQ009435	5430	ATCGGCCTGTCATGGGTATTGTGCAGGACACACTCACAGCAGTGCGCAAATTCACCAAGAGAGACGTCTT	PC Details: [Tiling]	chr17_+_7328421_7358653	POLR2A	MGC75453|POLR2|POLRA|RPB1|RPBh1|RPO2|RPOL2|RpIILS|hRPB220|hsRPB1	polymerase (RNA) II (DNA directed) polypeptide A, 220kDa
hSQ026853	4035	GCCCTGCTCCGAGAGTGAGTTCTCCTGTGCCAACGGCCGCTGCATCGCGGGGCGCTGGAAATGCGATGGA	PC Details: [Tiling]	chr12_+_55808542_55893390	LRP1	A2MR|APOER|APR|CD91|LRP|MGC88725|TGFBR5	low density lipoprotein-related protein 1 (alpha-2-macroglobulin receptor)
hSQ027371	7094	GCGCTAGATGGGGCCTTCACAGAGGAGAACCGTGCCCAGTGCCGAGCAGCAACAGCCCCTCTGCTGGAGG	PC Details: [Tiling]	chr9_-_35687333_35722367	TLN1	ILWEQ|KIAA1027|TLN	talin 1
hSQ009754	5430	ATGACCTGACTCACAAACTGGCTGACATCGTGAAGATCAACAATCAGCTGCGGCGCAATGAGCAGAACGG	PC Details: [Tiling]	chr17_+_7328421_7358653	POLR2A	MGC75453|POLR2|POLRA|RPB1|RPBh1|RPO2|RPOL2|RpIILS|hRPB220|hsRPB1	polymerase (RNA) II (DNA directed) polypeptide A, 220kDa
hSQ032963	4035	GTCTGCTTGCCCAGTCAGTTCAAATGCACCAACACCAACCGCTGTATTCCCGGCATCTTCCGCTGCAATG	PC Details: [Tiling]	chr12_+_55808542_55893390	LRP1	A2MR|APOER|APR|CD91|LRP|MGC88725|TGFBR5	low density lipoprotein-related protein 1 (alpha-2-macroglobulin receptor)
hSQ022621	7094	GAACCCAGTCCAGCCCATCAATGACATGTCCTACTTTGGTTGCCTGGACAGTGTAATGGAGAACTCAAAG	PC Details: [Tiling]	chr9_-_35687333_35722367	TLN1	ILWEQ|KIAA1027|TLN	talin 1
hSQ006840	5430	AGCGAATGTCTGTGACGGAGGGTGGCATCAAATACCCAGAGACGACTGAGGGAGGCCGCCCCAAGCTTGG	PC Details: [Tiling]	chr17_+_7328421_7358653	POLR2A	MGC75453|POLR2|POLRA|RPB1|RPBh1|RPO2|RPOL2|RpIILS|hRPB220|hsRPB1	polymerase (RNA) II (DNA directed) polypeptide A, 220kDa
hSQ004386	4035	ACCCTGTTTGAGGACTACGTCTACTGGACCGACTGGGAAACAAAGTCCATTAACCGAGCCCACAAGACCA	PC Details: [Tiling]	chr12_+_55808542_55893390	LRP1	A2MR|APOER|APR|CD91|LRP|MGC88725|TGFBR5	low density lipoprotein-related protein 1 (alpha-2-macroglobulin receptor)
hSQ031197	4035	GGGTGGGTGGCAACCTGTACTGGTGCGACAAAGGCCGGGACACCATCGAGGTGTCCAAGCTCAATGGGGC	PC Details: [Tiling]	chr12_+_55808542_55893390	LRP1	A2MR|APOER|APR|CD91|LRP|MGC88725|TGFBR5	low density lipoprotein-related protein 1 (alpha-2-macroglobulin receptor)
hSQ043784	4035	TTCTGATCTTCGCCAACCGGTACTACCTGCGCAAGCTCAACCTGGACGGGTCCAACTACACGTTACTTAA	PC Details: [Tiling]	chr12_+_55808542_55893390	LRP1	A2MR|APOER|APR|CD91|LRP|MGC88725|TGFBR5	low density lipoprotein-related protein 1 (alpha-2-macroglobulin receptor)
hSQ026560	4035	GCCAGGATGACTGTGGCGACAGCTCGGACGAGCGTGGCTGCCACATCAATGAGTGTCTCAGCCGCAAGCT	PC Details: [Tiling]	chr12_+_55808542_55893390	LRP1	A2MR|APOER|APR|CD91|LRP|MGC88725|TGFBR5	low density lipoprotein-related protein 1 (alpha-2-macroglobulin receptor)
hSQ035193	4035	TACAACAGCACTTGTGACGACCGTGAGTTCATGTGCCAGAACCGCCAGTGCATCCCCAAGCACTTCGTGT	PC Details: [Tiling]	chr12_+_55808542_55893390	LRP1	A2MR|APOER|APR|CD91|LRP|MGC88725|TGFBR5	low density lipoprotein-related protein 1 (alpha-2-macroglobulin receptor)
hSQ032897	6185	GTCTCAGCCTCTGACTCAGGCCACTGTTAAACTAGAACATGCTAAATCTGTTGCTTCCAGAGCCACTGTC	PC Details: [Tiling]	chr20_+_35240887_35303437	RPN2	RIBIIR|RPN-II|RPNII|SWP1	ribophorin II
hSQ019637	1938	CTCCACGGGTGGGCCTTCACCCTGAAGCAGTTTGCCGAGATGTATGTGGCCAAGTTCGCCGCCAAGGGGG	PC Details: [Tiling]	chr19_-_3927054_3936446	EEF2	EEF-2|EF2	eukaryotic translation elongation factor 2
hSQ030975	2934	GGGGCCCTGAAGTCAGAGGACTGCTTCATCCTGGACCACGGCAAAGATGGGAAAATCTTTGTCTGGAAAG	PC Details: [Tiling]	chr9_+_121043314_121174675	GSN	DKFZp313L0718	gelsolin (amyloidosis, Finnish type)
hSQ009682	6185	ATGAACTCGGGGGCGTGTATCTCCAGTTTGAAGAAGGACTGGAAACAACAGCGTTATTTGTGGCTGCCAC	PC Details: [Tiling]	chr20_+_35240887_35303437	RPN2	RIBIIR|RPN-II|RPNII|SWP1	ribophorin II
hSQ009510	1938	ATCTCCCTCTTCTACGAGCTCTCGGAGAATGACTTGAACTTCATCAAGCAGAGCAAGGACGGTGCCGGCT	PC Details: [Tiling]	chr19_-_3927054_3936446	EEF2	EEF-2|EF2	eukaryotic translation elongation factor 2
hSQ041687	2934	TGGTTCCAACAGCAATCGGTATGAAAGACTGAAGGCCACACAGGTGTCCAAGGGCATCCGGGACAACGAG	PC Details: [Tiling]	chr9_+_121043314_121174675	GSN	DKFZp313L0718	gelsolin (amyloidosis, Finnish type)
hSQ026027	6185	GCAGCTGTCAGTGAGGACTCATCTGTTACCCAGATCTACCATGCAGTTGCAGCTCTAAGTGGCTTTGGCC	PC Details: [Tiling]	chr20_+_35240887_35303437	RPN2	RIBIIR|RPN-II|RPNII|SWP1	ribophorin II
hSQ018161	1938	CGCCGCCATCCTCGGCGCGACTCGCTTCTTTCGGTTCTACCTGGGAGAATCCACCGCCATCCGCCACCAT	PC Details: [Tiling]	chr19_-_3927054_3936446	EEF2	EEF-2|EF2	eukaryotic translation elongation factor 2
hSQ013011	2934	CAGCACCGTGAGGTCCAGGGCTTCGAGTCGGCCACCTTCCTAGGCTACTTCAAGTCTGGCCTGAAGTACA	PC Details: [Tiling]	chr9_+_121043314_121174675	GSN	DKFZp313L0718	gelsolin (amyloidosis, Finnish type)
hSQ009705	7094	ATGAAGGACCAATGGGTGAACCAGAAGGTTCCTTCGTGGATTACCAAACAACTATGGTGCGGACAGCCAA	PC Details: [Tiling]	chr9_-_35687333_35722367	TLN1	ILWEQ|KIAA1027|TLN	talin 1
hSQ033567	6185	GTGGCGGGCTCTTGGAGCCACTTTCCCGAGCGGAAGTCAGCCCGCGGCTCGGACTCCGGCGGGACCTGCT	PC Details: [Tiling]	chr20_+_35240887_35303437	RPN2	RIBIIR|RPN-II|RPNII|SWP1	ribophorin II
hSQ016373	4035	CCCTTCCGTTGCAAGAATGACCGCGTCTGTCTGTGGATCGGGCGCCAATGCGATGGCACGGACAACTGTG	PC Details: [Tiling]	chr12_+_55808542_55893390	LRP1	A2MR|APOER|APR|CD91|LRP|MGC88725|TGFBR5	low density lipoprotein-related protein 1 (alpha-2-macroglobulin receptor)
hSQ012481	7094	CACTCAGATGCTCACTGCAGTCCAAGAGATCTCCCATCTCATTGAGCCGCTGGCCAATGCTGCCCGGGCT	PC Details: [Tiling]	chr9_-_35687333_35722367	TLN1	ILWEQ|KIAA1027|TLN	talin 1
hSQ029700	5430	GGCAGCCAACTCTGCACAAAATGTCCATGATGGGGCATCGGGTCCGCATTCTCCCATGGTCTACCTTTCG	PC Details: [Tiling]	chr17_+_7328421_7358653	POLR2A	MGC75453|POLR2|POLRA|RPB1|RPBh1|RPO2|RPOL2|RpIILS|hRPB220|hsRPB1	polymerase (RNA) II (DNA directed) polypeptide A, 220kDa
hSQ040523	4035	TGCGTGCCCGGCCGCTGGCAGTGCGACTACGACAACGATTGCGGTGACAACTCCGATGAAGAGAGCTGCA	PC Details: [Tiling]	chr12_+_55808542_55893390	LRP1	A2MR|APOER|APR|CD91|LRP|MGC88725|TGFBR5	low density lipoprotein-related protein 1 (alpha-2-macroglobulin receptor)
hSQ010932	7094	ATTGTGGCTAAACACACCTCTGCACTGTGTAACAGCTGTCGCCTGGCTTCTGCCCGTACCACCAATCCTA	PC Details: [Tiling]	chr9_-_35687333_35722367	TLN1	ILWEQ|KIAA1027|TLN	talin 1
hSQ027539	5430	GCGTTCTGGCCTAGAGTTGTATGCGGAATGGAAGCACGTTAATGAGGACTCTCAGGAGAAGAAGATCCTG	PC Details: [Tiling]	chr17_+_7328421_7358653	POLR2A	MGC75453|POLR2|POLRA|RPB1|RPBh1|RPO2|RPOL2|RpIILS|hRPB220|hsRPB1	polymerase (RNA) II (DNA directed) polypeptide A, 220kDa
hSQ016080	4035	CCCGGACAGTTCCAGTGCTCCACAGGTATCTGCACAAACCCTGCCTTCATCTGCGATGGCGACAATGACT	PC Details: [Tiling]	chr12_+_55808542_55893390	LRP1	A2MR|APOER|APR|CD91|LRP|MGC88725|TGFBR5	low density lipoprotein-related protein 1 (alpha-2-macroglobulin receptor)
hSQ034895	7094	TAACTGACAGCATCAATCAGCTCATCACTATGTGCACCCAGCAGGCACCCGGCCAGAAGGAGTGTGATAA	PC Details: [Tiling]	chr9_-_35687333_35722367	TLN1	ILWEQ|KIAA1027|TLN	talin 1
hSQ005727	5430	AGAAGGGCTCCTTTCGCTCCTTATTTCCCCGCCTCCTTCCCTCCCCCACCTTCCCCTCCTCCGGCTTTTT	PC Details: [Tiling]	chr17_+_7328421_7358653	POLR2A	MGC75453|POLR2|POLRA|RPB1|RPBh1|RPO2|RPOL2|RpIILS|hRPB220|hsRPB1	polymerase (RNA) II (DNA directed) polypeptide A, 220kDa
hSQ038612	7094	TCTGAACCGCTGTGTCAGCTGCCTACCTGGCCAGCGCGATGTGGATAATGCCCTGAGGGCAGTTGGAGAT	PC Details: [Tiling]	chr9_-_35687333_35722367	TLN1	ILWEQ|KIAA1027|TLN	talin 1
hSQ010103	7094	ATGGAGAAGTGTACCCAGGACCTGGGCAACAGCACCAAAGCCGTGAGCTCAGCCATCGCCCAGCTACTGG	PC Details: [Tiling]	chr9_-_35687333_35722367	TLN1	ILWEQ|KIAA1027|TLN	talin 1
hSQ001955	7094	AAGATGGTGGCAGCTGCAAAGGCCTCAGTGCCAACGATTCAGGACCAGGCTTCAGCCATGCAGCTGAGTC	PC Details: [Tiling]	chr9_-_35687333_35722367	TLN1	ILWEQ|KIAA1027|TLN	talin 1
hSQ019498	7094	CTCAGCCACACAGACCATCGCTGCAGCTCAGCACGCAGCCTCTACCCCCAAGGCCTCTGCCGGCCCCCAG	PC Details: [Tiling]	chr9_-_35687333_35722367	TLN1	ILWEQ|KIAA1027|TLN	talin 1
hSQ039656	4035	TGAGGATTACATCTATGGTGTCACCTACATCAATAATCGTGTCTTCAAGATCCATAAGTTTGGCCACAGC	PC Details: [Tiling]	chr12_+_55808542_55893390	LRP1	A2MR|APOER|APR|CD91|LRP|MGC88725|TGFBR5	low density lipoprotein-related protein 1 (alpha-2-macroglobulin receptor)
hSQ011683	5430	CAAGGAATTGAGCAAGAAGCTGGTGATTGTGAATGGGGATGACCCACTAAGTCGACAGGCCCAGGAAAAT	PC Details: [Tiling]	chr17_+_7328421_7358653	POLR2A	MGC75453|POLR2|POLRA|RPB1|RPBh1|RPO2|RPOL2|RpIILS|hRPB220|hsRPB1	polymerase (RNA) II (DNA directed) polypeptide A, 220kDa
hSQ004895	7094	ACTAATCAACGCAGTGAAAGATGTAGCCAAAGCCCTGGGAGACCTCATCAGTGCAACGAAGGCTGCAGCT	PC Details: [Tiling]	chr9_-_35687333_35722367	TLN1	ILWEQ|KIAA1027|TLN	talin 1
hSQ006354	4035	AGATTGAGACGGCAGCGATGGATGGGACGCTTCGGGAGACACTGGTGCAGGACAACATTCAGTGGCCCAC	PC Details: [Tiling]	chr12_+_55808542_55893390	LRP1	A2MR|APOER|APR|CD91|LRP|MGC88725|TGFBR5	low density lipoprotein-related protein 1 (alpha-2-macroglobulin receptor)
hSQ007274	5430	AGGACCTGGTGAAGGACGTGCTGAGCAACGCACACATCCAGAACGAGTTGGAGCGGGAATTTGAGCGGAT	PC Details: [Tiling]	chr17_+_7328421_7358653	POLR2A	MGC75453|POLR2|POLRA|RPB1|RPBh1|RPO2|RPOL2|RpIILS|hRPB220|hsRPB1	polymerase (RNA) II (DNA directed) polypeptide A, 220kDa
hSQ044225	7094	TTGCTGACCTCGACACCACCATCATGTTCGCCACTGCTGGCACGCTCAATCGTGAGGGTACTGAAACTTT	PC Details: [Tiling]	chr9_-_35687333_35722367	TLN1	ILWEQ|KIAA1027|TLN	talin 1
hSQ031523	4035	GGTGACGAGAGTGTCCGCATTGATGCTATGGATGTCCATGTCAAGGCTGGCCGTGTCTATTGGACCAACT	PC Details: [Tiling]	chr12_+_55808542_55893390	LRP1	A2MR|APOER|APR|CD91|LRP|MGC88725|TGFBR5	low density lipoprotein-related protein 1 (alpha-2-macroglobulin receptor)
hSQ037227	5430	TCATTGCTGTCGTTGGACAGCAGAACGTCGAGGGCAAGCGGATTCCATTTGGCTTCAAGCACCGGACTCT	PC Details: [Tiling]	chr17_+_7328421_7358653	POLR2A	MGC75453|POLR2|POLRA|RPB1|RPBh1|RPO2|RPOL2|RpIILS|hRPB220|hsRPB1	polymerase (RNA) II (DNA directed) polypeptide A, 220kDa
hSQ006102	7094	AGAGGAGCTGGGCCCTCTTGCTAACCAGCTGACCAGTGACTATGGCCGTCTGGCCTCGGAGGCCAAGCCT	PC Details: [Tiling]	chr9_-_35687333_35722367	TLN1	ILWEQ|KIAA1027|TLN	talin 1
hSQ011641	6185	CAAGCATGACGTGGAGAGACTAAAAGCCTCGCTGGATCGCCCTTTCACAAATTTGGAATCTGCCTTCTAC	PC Details: [Tiling]	chr20_+_35240887_35303437	RPN2	RIBIIR|RPN-II|RPNII|SWP1	ribophorin II
hSQ003721	4035	ACAGCCCACACCACCCACTGCAAAGACAAGAAGGAGTTTCTGTGCCGGAACCAGCGCTGCCTCTCCTCCT	PC Details: [Tiling]	chr12_+_55808542_55893390	LRP1	A2MR|APOER|APR|CD91|LRP|MGC88725|TGFBR5	low density lipoprotein-related protein 1 (alpha-2-macroglobulin receptor)
hSQ031407	5430	GGTCATGACATCACTCGCCTCTTCTACTCCAACATTCAGACTGTCATTAACAACTGGCTCCTCATCGAGG	PC Details: [Tiling]	chr17_+_7328421_7358653	POLR2A	MGC75453|POLR2|POLRA|RPB1|RPBh1|RPO2|RPOL2|RpIILS|hRPB220|hsRPB1	polymerase (RNA) II (DNA directed) polypeptide A, 220kDa
hSQ011423	4035	CAACAACACCTTGTGCAAGCCGCTGGCCTGGAAGTGCGATGGCGAGGATGACTGTGGGGACAACTCAGAT	PC Details: [Tiling]	chr12_+_55808542_55893390	LRP1	A2MR|APOER|APR|CD91|LRP|MGC88725|TGFBR5	low density lipoprotein-related protein 1 (alpha-2-macroglobulin receptor)
hSQ042062	7094	TGTGAAACGGCCATTGCAGCTCTGAACAGTTGTCTACGGGACCTAGACCAGGCTTCCCTCGCTGCAGTCA	PC Details: [Tiling]	chr9_-_35687333_35722367	TLN1	ILWEQ|KIAA1027|TLN	talin 1
hSQ013489	5430	CAGTACCCAGGCGCCAAGTACATCATCCGAGACAATGGTGATCGCATTGACTTGCGTTTCCACCCCAAGC	PC Details: [Tiling]	chr17_+_7328421_7358653	POLR2A	MGC75453|POLR2|POLRA|RPB1|RPBh1|RPO2|RPOL2|RpIILS|hRPB220|hsRPB1	polymerase (RNA) II (DNA directed) polypeptide A, 220kDa
hSQ015072	4035	CCAGCGCGTTGGAAGTGTGACGGAGAGGATGACTGTGGGGATGGCTCGGATGAGCCCAAGGAAGAGTGTG	PC Details: [Tiling]	chr12_+_55808542_55893390	LRP1	A2MR|APOER|APR|CD91|LRP|MGC88725|TGFBR5	low density lipoprotein-related protein 1 (alpha-2-macroglobulin receptor)
hSQ003521	7094	ACACAGTTTGCCCGTGCAAACCAGGCAATTCAGATGGCCTGCCAGAGTTTGGGAGAGCCTGGCTGTACCC	PC Details: [Tiling]	chr9_-_35687333_35722367	TLN1	ILWEQ|KIAA1027|TLN	talin 1
hSQ027573	5430	GCTAAGTCCAAGGGACAGCCCAAGAAGCGGCTCACACATGTCTACGACCTTTGCAAGGGCAAAAACATAT	PC Details: [Tiling]	chr17_+_7328421_7358653	POLR2A	MGC75453|POLR2|POLRA|RPB1|RPBh1|RPO2|RPOL2|RpIILS|hRPB220|hsRPB1	polymerase (RNA) II (DNA directed) polypeptide A, 220kDa
hSQ045220	4035	TTTGTATGCAAGAACGACAAGTGCATCCCCTTCTGGTGGAAGTGTGACACCGAGGACGACTGCGGGGACC	PC Details: [Tiling]	chr12_+_55808542_55893390	LRP1	A2MR|APOER|APR|CD91|LRP|MGC88725|TGFBR5	low density lipoprotein-related protein 1 (alpha-2-macroglobulin receptor)
hSQ004402	7094	ACCGAGCCCAAGTTGTGTCCAACTTGAAGGGCATCTCCATGTCTTCAAGCAAACTTCTTCTGGCTGCCAA	PC Details: [Tiling]	chr9_-_35687333_35722367	TLN1	ILWEQ|KIAA1027|TLN	talin 1
hSQ026290	4035	GCATGGATGGGTCCAGCCGCAGCGTCATCGTGGACACCAAGATCACATGGCCCAATGGCCTGACGCTGGA	PC Details: [Tiling]	chr12_+_55808542_55893390	LRP1	A2MR|APOER|APR|CD91|LRP|MGC88725|TGFBR5	low density lipoprotein-related protein 1 (alpha-2-macroglobulin receptor)
hSQ039170	4035	TGAACAACGCCGTTGCCTTGGATTTTGACTACCGAGAGCAGATGATCTACTGGACAGATGTGACCACCCA	PC Details: [Tiling]	chr12_+_55808542_55893390	LRP1	A2MR|APOER|APR|CD91|LRP|MGC88725|TGFBR5	low density lipoprotein-related protein 1 (alpha-2-macroglobulin receptor)
hSQ017432	4035	CCTGGCTTCCGGCTGAAGGACGACGGCCGGACGTGTGCTGATGTGGACGAGTGCAGCACCACCTTCCCCT	PC Details: [Tiling]	chr12_+_55808542_55893390	LRP1	A2MR|APOER|APR|CD91|LRP|MGC88725|TGFBR5	low density lipoprotein-related protein 1 (alpha-2-macroglobulin receptor)
hSQ003056	4035	AATGGGCGCTGTCTGAGCTCCCGCCAGTGGGAGTGTGATGGCGAGAATGACTGCCACGACCAGAGTGACG	PC Details: [Tiling]	chr12_+_55808542_55893390	LRP1	A2MR|APOER|APR|CD91|LRP|MGC88725|TGFBR5	low density lipoprotein-related protein 1 (alpha-2-macroglobulin receptor)
hSQ006619	1938	AGCCACCAGCCCCGAAGGGAAGAAGCTGCCACGCACCTTCTGCCAGCTGATCCTGGACCCCATCTTCAAG	PC Details: [Tiling]	chr19_-_3927054_3936446	EEF2	EEF-2|EF2	eukaryotic translation elongation factor 2
hSQ007328	2934	AGGAGAGGAAGGCTGCCCTCAAAACAGCCTCTGACTTCATCACCAAGATGGACTACCCCAAGCAGACTCA	PC Details: [Tiling]	chr9_+_121043314_121174675	GSN	DKFZp313L0718	gelsolin (amyloidosis, Finnish type)
hSQ009678	6185	ATGAACGCGATCTTCAGCAAGAAGAACTTTGAGTCCCTCTCCGAAGCCTTCAGCGTGGCCTCTGCAGCTG	PC Details: [Tiling]	chr20_+_35240887_35303437	RPN2	RIBIIR|RPN-II|RPNII|SWP1	ribophorin II
hSQ005917	1938	AGACGGAGACAGTGCTGCGGCAGGCCATTGCCGAGCGCATCAAGCCTGTGCTGATGATGAACAAGATGGA	PC Details: [Tiling]	chr19_-_3927054_3936446	EEF2	EEF-2|EF2	eukaryotic translation elongation factor 2
hSQ020080	2934	CTCTGCCTGCAGGTACCGAGGACACCGCCAAGGAGGATGCGGCCAACCGCAAGCTGGCCAAGCTCTACAA	PC Details: [Tiling]	chr9_+_121043314_121174675	GSN	DKFZp313L0718	gelsolin (amyloidosis, Finnish type)
hSQ013534	6185	CAGTCCAGGCTCTGCAGACAGCATCCCACCTGTCCCAGCAGGCTGACCTGAGGAGCATCGTGGAGGAGAT	PC Details: [Tiling]	chr20_+_35240887_35303437	RPN2	RIBIIR|RPN-II|RPNII|SWP1	ribophorin II
hSQ039222	1938	TGAACTTCACGGTAGACCAGATCCGCGCCATCATGGACAAGAAGGCCAACATCCGCAACATGTCTGTCAT	PC Details: [Tiling]	chr19_-_3927054_3936446	EEF2	EEF-2|EF2	eukaryotic translation elongation factor 2
hSQ009165	2934	ATCAGGATTCAAGCACGTGGTACCCAACGAGGTGGTGGTGCAGAGACTCTTCCAGGTCAAAGGGCGGCGT	PC Details: [Tiling]	chr9_+_121043314_121174675	GSN	DKFZp313L0718	gelsolin (amyloidosis, Finnish type)
hSQ000649	6185	AAAGCATGTACCTACATCAGATCTAACCTTGATCCCAGCAATGTGGATTCCCTCTTCTACGCTGCCCAGG	PC Details: [Tiling]	chr20_+_35240887_35303437	RPN2	RIBIIR|RPN-II|RPNII|SWP1	ribophorin II
hSQ012167	4035	CACCAATGCCAGCATCTGTGGGGACGAGGCACGCTGCGTGCGCACCGAGAAAGCGGCCTACTGTGCCTGC	PC Details: [Tiling]	chr12_+_55808542_55893390	LRP1	A2MR|APOER|APR|CD91|LRP|MGC88725|TGFBR5	low density lipoprotein-related protein 1 (alpha-2-macroglobulin receptor)
hSQ035524	5430	TACTATTGGCATTGGGGACTCCATTGCTGATTCTAAGACTTACCAGGACATTCAGAACACTATTAAGAAG	PC Details: [Tiling]	chr17_+_7328421_7358653	POLR2A	MGC75453|POLR2|POLRA|RPB1|RPBh1|RPO2|RPOL2|RpIILS|hRPB220|hsRPB1	polymerase (RNA) II (DNA directed) polypeptide A, 220kDa
hSQ008832	2934	ATAGCTCTCTTTGTCCAGTGCTTCGGCCTTGGTCCCAGCGCCTTCCCACGGAGCAGCACTCTTCACCCTG	PC Details: [Tiling]	chr9_+_121043314_121174675	GSN	DKFZp313L0718	gelsolin (amyloidosis, Finnish type)
hSQ025544	5430	GCAAATCTTCTCCCTCATCATACCTGGTCACATCAATTGTATCCGTACCCACAGTACCCATCCCGATGAT	PC Details: [Tiling]	chr17_+_7328421_7358653	POLR2A	MGC75453|POLR2|POLRA|RPB1|RPBh1|RPO2|RPOL2|RpIILS|hRPB220|hsRPB1	polymerase (RNA) II (DNA directed) polypeptide A, 220kDa
hSQ000593	4035	AAAGACTGCACCCCCCGCTGTGACATGGACCAGTTCCAGTGCAAGAGCGGCCACTGCATCCCCCTGCGCT	PC Details: [Tiling]	chr12_+_55808542_55893390	LRP1	A2MR|APOER|APR|CD91|LRP|MGC88725|TGFBR5	low density lipoprotein-related protein 1 (alpha-2-macroglobulin receptor)
hSQ010110	7094	ATGGAGCCCATTGTGATCTCTGCCAAGACAATGTTAGAGAGTGCCGGGGGACTCATCCAGACAGCCCGGG	PC Details: [Tiling]	chr9_-_35687333_35722367	TLN1	ILWEQ|KIAA1027|TLN	talin 1
hSQ044341	5430	TTGGCGTGCCCCGCTCCATTGCTGCCAACATGACCTTTGCGGAGATTGTCACCCCCTTCAACATTGACAG	PC Details: [Tiling]	chr17_+_7328421_7358653	POLR2A	MGC75453|POLR2|POLRA|RPB1|RPBh1|RPO2|RPOL2|RpIILS|hRPB220|hsRPB1	polymerase (RNA) II (DNA directed) polypeptide A, 220kDa
hSQ001327	4035	AACCAGTTCCAGTGCTCCATTACCAAACGGTGCATCCCCCGGGTCTGGGTCTGCGACCGGGACAATGACT	PC Details: [Tiling]	chr12_+_55808542_55893390	LRP1	A2MR|APOER|APR|CD91|LRP|MGC88725|TGFBR5	low density lipoprotein-related protein 1 (alpha-2-macroglobulin receptor)
hSQ038486	7094	TCTCCCAAAATGCCAAGAACGGAAACCTGCCAGAGTTTGGAGATGCCATTTCCACAGCCTCAAAGGCACT	PC Details: [Tiling]	chr9_-_35687333_35722367	TLN1	ILWEQ|KIAA1027|TLN	talin 1
hSQ036817	5430	TCACGTGGGCTTCCTGGTGAAGACAATGAAAGTTTTGCGCTGTGTCTGCTTCTTCTGCTCCAAACTGCTT	PC Details: [Tiling]	chr17_+_7328421_7358653	POLR2A	MGC75453|POLR2|POLRA|RPB1|RPBh1|RPO2|RPOL2|RpIILS|hRPB220|hsRPB1	polymerase (RNA) II (DNA directed) polypeptide A, 220kDa
hSQ001009	4035	AAATGTGCCTGCCCCACCAACTTCTACCTGGGCAGCGATGGGCGCACCTGTGTGTCCAACTGCACGGCTA	PC Details: [Tiling]	chr12_+_55808542_55893390	LRP1	A2MR|APOER|APR|CD91|LRP|MGC88725|TGFBR5	low density lipoprotein-related protein 1 (alpha-2-macroglobulin receptor)
hSQ004027	7094	ACATTTCAAGAAGCTCAGAGCCGGTTGAATGAAGCTGCTGCTGGGCTGAATCAGGCAGCCACAGAACTGG	PC Details: [Tiling]	chr9_-_35687333_35722367	TLN1	ILWEQ|KIAA1027|TLN	talin 1
hSQ020302	7094	CTGACGTCAGATCCTGCAGTGCAGGCCATTGTACTTGATACGGCCAGTGATGTGCTGGACAAGGCCAGCA	PC Details: [Tiling]	chr9_-_35687333_35722367	TLN1	ILWEQ|KIAA1027|TLN	talin 1
hSQ019516	7094	CTCAGGAAGCATGTGGACCTTTGGAGATGGATTCTGCACTGAGTGTGGTACAGAATCTAGAGAAAGATCT	PC Details: [Tiling]	chr9_-_35687333_35722367	TLN1	ILWEQ|KIAA1027|TLN	talin 1
hSQ006342	7094	AGATTCCACTGCTGGTGCAGGGCGTCCGAGGAAGCCAAGCCCAGCCTGACAGCCCCAGCGCTCAGCTTGC	PC Details: [Tiling]	chr9_-_35687333_35722367	TLN1	ILWEQ|KIAA1027|TLN	talin 1
hSQ003444	4035	ACAAGTTCTGCTCAGAGGCCCAGTTTGAGTGCCAGAACCATCGCTGCATCTCCAAGCAGTGGCTGTGTGA	PC Details: [Tiling]	chr12_+_55808542_55893390	LRP1	A2MR|APOER|APR|CD91|LRP|MGC88725|TGFBR5	low density lipoprotein-related protein 1 (alpha-2-macroglobulin receptor)
hSQ035602	4035	TACTTCCGCCTGGGCGTGAAGGGCGTGCTCTTCCAGCCCTGCGAGCGGACCTCACTCTGCTACGCACCCA	PC Details: [Tiling]	chr12_+_55808542_55893390	LRP1	A2MR|APOER|APR|CD91|LRP|MGC88725|TGFBR5	low density lipoprotein-related protein 1 (alpha-2-macroglobulin receptor)
hSQ008219	4035	AGTGCAGCAATGGGCGCTGTGTGTCCAACATGCTGTGGTGCAACGGGGCCGACGACTGTGGGGATGGCTC	PC Details: [Tiling]	chr12_+_55808542_55893390	LRP1	A2MR|APOER|APR|CD91|LRP|MGC88725|TGFBR5	low density lipoprotein-related protein 1 (alpha-2-macroglobulin receptor)
hSQ001486	4035	AACGGTGGCTGCCAGGACCTGTGTCTGCTCACTCACCAGGGCCATGTCAACTGCTCATGCCGAGGGGGCC	PC Details: [Tiling]	chr12_+_55808542_55893390	LRP1	A2MR|APOER|APR|CD91|LRP|MGC88725|TGFBR5	low density lipoprotein-related protein 1 (alpha-2-macroglobulin receptor)
hSQ022898	4035	GAAGCTCTACTTCTCTGACGCCACCCTGGACAAGATCGAGCGGTGCGAGTATGACGGCTCCCACCGCTAT	PC Details: [Tiling]	chr12_+_55808542_55893390	LRP1	A2MR|APOER|APR|CD91|LRP|MGC88725|TGFBR5	low density lipoprotein-related protein 1 (alpha-2-macroglobulin receptor)
hSQ018074	4035	CGCACCATTCTCAAGAGTATCCACCTGTCGGATGAGCGCAACCTCAATGCGCCCGTGCAGCCCTTCGAGG	PC Details: [Tiling]	chr12_+_55808542_55893390	LRP1	A2MR|APOER|APR|CD91|LRP|MGC88725|TGFBR5	low density lipoprotein-related protein 1 (alpha-2-macroglobulin receptor)
hSQ016546	4035	CCGCGAGGTGGTTCTGTCCAGCAACAACATGGACATGTTTTCAGTGTCTGTGTTTGAGGATTTCATCTAC	PC Details: [Tiling]	chr12_+_55808542_55893390	LRP1	A2MR|APOER|APR|CD91|LRP|MGC88725|TGFBR5	low density lipoprotein-related protein 1 (alpha-2-macroglobulin receptor)
hSQ026791	4035	GCCCGGCTCAATGGCTCCTTCCGCTACGTGGTGATCTCCCAGGGTCTAGACAAGCCCCGGGCCATCACCG	PC Details: [Tiling]	chr12_+_55808542_55893390	LRP1	A2MR|APOER|APR|CD91|LRP|MGC88725|TGFBR5	low density lipoprotein-related protein 1 (alpha-2-macroglobulin receptor)
hSQ038866	4035	TCTGTGCATGAGGGAATCAGGGGAATTCCCCTGGATCCCAATGACAAGTCAGATGCCCTGGTCCCAGTGT	PC Details: [Tiling]	chr12_+_55808542_55893390	LRP1	A2MR|APOER|APR|CD91|LRP|MGC88725|TGFBR5	low density lipoprotein-related protein 1 (alpha-2-macroglobulin receptor)
hSQ011677	4035	CAAGCTGTGGTGGGCTGATCAGGTGTCGGAAAAGATGGGCACATGCAGCAAGGCTGACGGCTCGGGCTCC	PC Details: [Tiling]	chr12_+_55808542_55893390	LRP1	A2MR|APOER|APR|CD91|LRP|MGC88725|TGFBR5	low density lipoprotein-related protein 1 (alpha-2-macroglobulin receptor)
hSQ018601	4035	CGGTGCCCGACATCGACAACGTCACAGTGCTAGACTACGATGCCCGCGAGCAGCGTGTGTACTGGTCTGA	PC Details: [Tiling]	chr12_+_55808542_55893390	LRP1	A2MR|APOER|APR|CD91|LRP|MGC88725|TGFBR5	low density lipoprotein-related protein 1 (alpha-2-macroglobulin receptor)
hSQ041290	4035	TGGCTGTAGACTGGATTGCAGGCAACATCTACTGGGTGGAGAGTAACCTGGATCAGATCGAGGTGGCCAA	PC Details: [Tiling]	chr12_+_55808542_55893390	LRP1	A2MR|APOER|APR|CD91|LRP|MGC88725|TGFBR5	low density lipoprotein-related protein 1 (alpha-2-macroglobulin receptor)
hSQ010226	4035	ATGGGGACACTGACTGCATGGACTCCAGCGATGAGAAGAGCTGTGAGGGAGTGACCCACGTCTGCGATCC	PC Details: [Tiling]	chr12_+_55808542_55893390	LRP1	A2MR|APOER|APR|CD91|LRP|MGC88725|TGFBR5	low density lipoprotein-related protein 1 (alpha-2-macroglobulin receptor)
hSQ009293	4035	ATCCCCAACCGCTGGCTCTGCGACGGGGACAATGACTGTGGGAACAGTGAAGATGAGTCCAATGCCACTT	PC Details: [Tiling]	chr12_+_55808542_55893390	LRP1	A2MR|APOER|APR|CD91|LRP|MGC88725|TGFBR5	low density lipoprotein-related protein 1 (alpha-2-macroglobulin receptor)
hSQ029474	4035	GGATGGATGGCTCACACCGAGACATCTTTGTCACCTCCAAGACAGTGCTTTGGCCCAATGGGCTAAGCCT	PC Details: [Tiling]	chr12_+_55808542_55893390	LRP1	A2MR|APOER|APR|CD91|LRP|MGC88725|TGFBR5	low density lipoprotein-related protein 1 (alpha-2-macroglobulin receptor)
hSQ044032	4035	TTGAGCACCTGTACGGCCTGACTGTGTTTGAGAATTATCTCTATGCCACCAACTCGGACAATGCCAATGC	PC Details: [Tiling]	chr12_+_55808542_55893390	LRP1	A2MR|APOER|APR|CD91|LRP|MGC88725|TGFBR5	low density lipoprotein-related protein 1 (alpha-2-macroglobulin receptor)
hSQ003504	4035	ACACAGACGGCTCCTTCATATGTGGCTGTGTTGAAGGATACCTCCTGCAGCCGGATAACCGCTCCTGCAA	PC Details: [Tiling]	chr12_+_55808542_55893390	LRP1	A2MR|APOER|APR|CD91|LRP|MGC88725|TGFBR5	low density lipoprotein-related protein 1 (alpha-2-macroglobulin receptor)
hSQ010929	4035	ATTGTGCATTTTTGCAGCCGGAGGCGGCTCCGAGATGGGGCTGTGAGCTTCGCCCGGGGAGGGGGAAAGA	PC Details: [Tiling]	chr12_+_55808542_55893390	LRP1	A2MR|APOER|APR|CD91|LRP|MGC88725|TGFBR5	low density lipoprotein-related protein 1 (alpha-2-macroglobulin receptor)
hSQ021313	3251	CTGTTTATTTGCACTATGAGCCTATAGACTATCAGTTCCCTTTGGGCGGATTGTTGTTTAACTTGTAAAT	PC Details: [Mismatch Controls; Wild-Type]	chrX_+_133319776_133360216	HPRT1	HGPRT|HPRT	hypoxanthine phosphoribosyltransferase 1 (Lesch-Nyhan syndrome)
hSQ002555	567	AAGTGGGATCGAGACATGTAAGCAGCATCATGGAGGTTTGAAGATGCCGCATTTGGATTGGATGAATTCC	PC Details: [Mismatch Controls; Wild-Type]	chr15_+_42791008_42797634	B2M	-	beta-2-microglobulin
hSQ012541	6908	CACTGAGAACACCGCGCAGCGTGACTGTGAGTTGCTCATACCGTGCTGCTATCTGGGCAGCGCTGCCCAT	PC Details: [Mismatch Controls; Wild-Type]	chr6_+_170781090_170799578	TBP	GTF2D|GTF2D1|MGC117320|MGC126054|MGC126055|SCA17|TFIID	TATA box binding protein
hSQ001054	3251	AAATTTATTTGCACTATGAGCCTATAGACTATCAGTTCCCTTTGGGCGGATTGTTGTTTAACTTGTCGTC	PC Details: [Mismatch Controls; Anchored]	chrX_+_133319776_133360216	HPRT1	HGPRT|HPRT	hypoxanthine phosphoribosyltransferase 1 (Lesch-Nyhan syndrome)
hSQ044221	3251	TTGCTCGTTTGCACTATGAGCCTATAGACTATCAGTTCCCTTTGGGCGGATTGTTGTTTAACTCACGGGA	PC Details: [Mismatch Controls; Anchored]	chrX_+_133319776_133360216	HPRT1	HGPRT|HPRT	hypoxanthine phosphoribosyltransferase 1 (Lesch-Nyhan syndrome)
hSQ038092	3251	TCGCCCGCCCGCACTATGAGCCTATAGACTATCAGTTCCCTTTGGGCGGATTGTTGTTTGTCGTGTTCCG	PC Details: [Mismatch Controls; Anchored]	chrX_+_133319776_133360216	HPRT1	HGPRT|HPRT	hypoxanthine phosphoribosyltransferase 1 (Lesch-Nyhan syndrome)
hSQ009566	7094	ATCTGGAGAACTCCCGCAAGCTCTTAAGTGCTGCCAAGATCCTAGCTGATGCCACAGCCAAGATGGTAGA	PC Details: [Tiling]	chr9_-_35687333_35722367	TLN1	ILWEQ|KIAA1027|TLN	talin 1
hSQ038176	7094	TCGGGACTTCAGACCCAAGTTATTGCTGCAGCAACACAGTGTGCCCTATCCACTTCCCAACTAGTGGCCT	PC Details: [Tiling]	chr9_-_35687333_35722367	TLN1	ILWEQ|KIAA1027|TLN	talin 1
hSQ039538	7094	TGAGACAGACTATACCGCAGTGGGCTGTGCAGTCACCACAATCTCCTCCAACCTGACGGAGATGTCCCGT	PC Details: [Tiling]	chr9_-_35687333_35722367	TLN1	ILWEQ|KIAA1027|TLN	talin 1
hSQ040827	7094	TGGAACCATTAACTCCAGCATGCAGGCCGTGCAGGCTGCCCAGGCCACCCTGGATGACTTTGACACTCTG	PC Details: [Tiling]	chr9_-_35687333_35722367	TLN1	ILWEQ|KIAA1027|TLN	talin 1
hSQ000003	7094	AAAAAAAGCAAGGATCACTTTGGGCTGGAAGGAGATGAGGAGTCTACTATGCTGGAGGACTCAGTGTCCC	PC Details: [Tiling]	chr9_-_35687333_35722367	TLN1	ILWEQ|KIAA1027|TLN	talin 1
hSQ000024	7094	AAAAAATGAAAGGGAAGAACAAGCTAGTGCCCAGGCTTCTGGGCATCACCAAGGAGTGTGTGATGCGAGT	PC Details: [Tiling]	chr9_-_35687333_35722367	TLN1	ILWEQ|KIAA1027|TLN	talin 1
hSQ014983	7094	CCAGATCGGCCTGAAGGACTTCCTGCCCAAGGAGTATGTGAAGCAGAAGGGAGAGCGTAAGATCTTCCAG	PC Details: [Tiling]	chr9_-_35687333_35722367	TLN1	ILWEQ|KIAA1027|TLN	talin 1
hSQ039218	7094	TGAACTGGCTGGACCATGGTCGGACACTGAGGGAGCAGGGTGTAGAGGAGCACGAGACGCTGCTGCTGCG	PC Details: [Tiling]	chr9_-_35687333_35722367	TLN1	ILWEQ|KIAA1027|TLN	talin 1
hSQ042071	7094	TGTGAAGACGATCATGGTGGATGACTCTAAGACTGTCACTGACATGCTCATGACCATCTGTGCCCGCATT	PC Details: [Tiling]	chr9_-_35687333_35722367	TLN1	ILWEQ|KIAA1027|TLN	talin 1
hSQ022027	7094	CTTTCACTGAAGATCAGCATTGGGAATGTGGTGAAGACGATGCAGTTTGAGCCGTCTACCATGGTGTACG	PC Details: [Tiling]	chr9_-_35687333_35722367	TLN1	ILWEQ|KIAA1027|TLN	talin 1
hSQ021195	4035	CTGTGGACTGGGTCTCCCGAAACCTGTTCTGGACAAGCTATGACACCAATAAGAAGCAGATCAATGTGGC	PC Details: [Tiling]	chr12_+_55808542_55893390	LRP1	A2MR|APOER|APR|CD91|LRP|MGC88725|TGFBR5	low density lipoprotein-related protein 1 (alpha-2-macroglobulin receptor)
hSQ005889	4035	AGACCGGCTCTGGGGGCTGGCCCAACGGGCTCACCGTGGACTACCTGGAGAAGCGCATCCTTTGGATTGA	PC Details: [Tiling]	chr12_+_55808542_55893390	LRP1	A2MR|APOER|APR|CD91|LRP|MGC88725|TGFBR5	low density lipoprotein-related protein 1 (alpha-2-macroglobulin receptor)
hSQ040109	4035	TGCAGGCCACCCTCGCACCCTTGTGCCAACAACACCTCAGTCTGCCTGCCCCCTGACAAGCTGTGTGATG	PC Details: [Tiling]	chr12_+_55808542_55893390	LRP1	A2MR|APOER|APR|CD91|LRP|MGC88725|TGFBR5	low density lipoprotein-related protein 1 (alpha-2-macroglobulin receptor)
hSQ013928	4035	CATCCCCATCTCCTGGACGTGTGATCTGGATGACGACTGTGGGGACCGCTCTGATGAGTCTGCTTCGTGT	PC Details: [Tiling]	chr12_+_55808542_55893390	LRP1	A2MR|APOER|APR|CD91|LRP|MGC88725|TGFBR5	low density lipoprotein-related protein 1 (alpha-2-macroglobulin receptor)
hSQ010137	4035	ATGGCAACTACCTCTTCTGGACTGAGTATCGGAGTGGCAGTGTCTACCGCTTGGAACGGGGTGTAGGAGG	PC Details: [Tiling]	chr12_+_55808542_55893390	LRP1	A2MR|APOER|APR|CD91|LRP|MGC88725|TGFBR5	low density lipoprotein-related protein 1 (alpha-2-macroglobulin receptor)
hSQ009991	4035	ATGCCTGTGAAAACGACCAGTATGGGAAGCCGGGTGGCTGCTCTGACATCTGCCTGCTGGCCAACAGCCA	PC Details: [Tiling]	chr12_+_55808542_55893390	LRP1	A2MR|APOER|APR|CD91|LRP|MGC88725|TGFBR5	low density lipoprotein-related protein 1 (alpha-2-macroglobulin receptor)
hSQ038307	4035	TCTACCATCACACCTACGAGCACGCGGCAGACCACAGCCATGGACTTCAGCTATGCCAACGAGACCGTAT	PC Details: [Tiling]	chr12_+_55808542_55893390	LRP1	A2MR|APOER|APR|CD91|LRP|MGC88725|TGFBR5	low density lipoprotein-related protein 1 (alpha-2-macroglobulin receptor)
hSQ006545	4035	AGCAGTTTGCCTGCAGAGATCAAATAACCTGTATCTCAAAGGGCTGGCGGTGCGACGGTGAGAGGGACTG	PC Details: [Tiling]	chr12_+_55808542_55893390	LRP1	A2MR|APOER|APR|CD91|LRP|MGC88725|TGFBR5	low density lipoprotein-related protein 1 (alpha-2-macroglobulin receptor)
hSQ002555	567	AAGTGGGATCGAGACATGTAAGCAGCATCATGGAGGTTTGAAGATGCCGCATTTGGATTGGATGAATTCC	PC Details: [Mismatch Controls; Wild-Type]	chr15_+_42791008_42797634	B2M	-	beta-2-microglobulin
hSQ012541	6908	CACTGAGAACACCGCGCAGCGTGACTGTGAGTTGCTCATACCGTGCTGCTATCTGGGCAGCGCTGCCCAT	PC Details: [Mismatch Controls; Wild-Type]	chr6_+_170781090_170799578	TBP	GTF2D|GTF2D1|MGC117320|MGC126054|MGC126055|SCA17|TFIID	TATA box binding protein
hSQ040268	3145	TGCCCAGCATGAAGATGGCCCTGAGGATGACCCACAGTTGGTAGGCATCACTGCTCGTAACATTCCACGA	PC Details: [Mismatch Controls; Wild-Type]	chr11_+_118443700_118469468	HMBS	PBG-D|PBGD|UPS	hydroxymethylbilane synthase
hSQ038017	6389	TCCTTTGTGGACGTTGGCACTGGGAAGGTCACTCTGGAATATAGACCCGTAATCGACAAAACTTTGAACG	PC Details: [Mismatch Controls; Wild-Type]	chr5_-_1625375_1627469	SDHA	FP|SDH2|SDHF	succinate dehydrogenase complex, subunit A, flavoprotein (Fp)
hSQ042790	3251	TTACTATTTTGCACTATGAGCCTATAGACTATCAGTTCCCTTTGGGCGGATTGTTGTTTAACTGACGCGC	PC Details: [Mismatch Controls; Anchored]	chrX_+_133319776_133360216	HPRT1	HGPRT|HPRT	hypoxanthine phosphoribosyltransferase 1 (Lesch-Nyhan syndrome)
hSQ037452	3251	TCCATCGCCCGCACTATGAGCCTATAGACTATCAGTTCCCTTTGGGCGGATTGTTGTTTGTGCCACGCTA	PC Details: [Mismatch Controls; Anchored]	chrX_+_133319776_133360216	HPRT1	HGPRT|HPRT	hypoxanthine phosphoribosyltransferase 1 (Lesch-Nyhan syndrome)
hSQ024274	4035	GAGCGCTGGCTCTGTGACGGTGACAAAGACTGTGCTGATGGTGCAGACGAGAGCATCGCAGCTGGTTGCT	PC Details: [Tiling]	chr12_+_55808542_55893390	LRP1	A2MR|APOER|APR|CD91|LRP|MGC88725|TGFBR5	low density lipoprotein-related protein 1 (alpha-2-macroglobulin receptor)
hSQ020533	4035	CTGCATCCCCATGAGCTGGACGTGTGACAAAGAGGATGACTGTGAACATGGCGAGGACGAGACCCACTGC	PC Details: [Tiling]	chr12_+_55808542_55893390	LRP1	A2MR|APOER|APR|CD91|LRP|MGC88725|TGFBR5	low density lipoprotein-related protein 1 (alpha-2-macroglobulin receptor)
hSQ040152	4035	TGCATCGGGAACTCCAGCCGCTGCAACCAGTTTGTGGATTGTGAGGACGCCTCAGATGAGATGAACTGCA	PC Details: [Tiling]	chr12_+_55808542_55893390	LRP1	A2MR|APOER|APR|CD91|LRP|MGC88725|TGFBR5	low density lipoprotein-related protein 1 (alpha-2-macroglobulin receptor)
hSQ039014	4035	TCTTGCCGAGCACAAGATGAGTTTGAGTGTGCCAATGGCGAGTGCATCAACTTCAGCCTGACCTGCGACG	PC Details: [Tiling]	chr12_+_55808542_55893390	LRP1	A2MR|APOER|APR|CD91|LRP|MGC88725|TGFBR5	low density lipoprotein-related protein 1 (alpha-2-macroglobulin receptor)
hSQ036904	4035	TCAGAGCCTGTCCACCCCTTCGGGCTGGCCGTGTATGGGGAGCACATTTTCTGGACTGACTGGGTGCGGC	PC Details: [Tiling]	chr12_+_55808542_55893390	LRP1	A2MR|APOER|APR|CD91|LRP|MGC88725|TGFBR5	low density lipoprotein-related protein 1 (alpha-2-macroglobulin receptor)
hSQ030505	4035	GGGACACTCTCTATTGGACAAGCTACACGACATCCACCATCACGCGCCACACAGTGGACCAGACCCGCCC	PC Details: [Tiling]	chr12_+_55808542_55893390	LRP1	A2MR|APOER|APR|CD91|LRP|MGC88725|TGFBR5	low density lipoprotein-related protein 1 (alpha-2-macroglobulin receptor)
hSQ027860	4035	GCTCTATCAAGCGCGGGAGCAAAGACAATGCCACAGACTCCGTGCCCCTGCGAACCGGCATCGGCGTCCA	PC Details: [Tiling]	chr12_+_55808542_55893390	LRP1	A2MR|APOER|APR|CD91|LRP|MGC88725|TGFBR5	low density lipoprotein-related protein 1 (alpha-2-macroglobulin receptor)
hSQ036151	4035	TATCCGCGTATTGAGCGGTCTCGGCTAGATGGCACGGAGCGTGTGGTGCTGGTCAACGTCAGCATCAGCT	PC Details: [Tiling]	chr12_+_55808542_55893390	LRP1	A2MR|APOER|APR|CD91|LRP|MGC88725|TGFBR5	low density lipoprotein-related protein 1 (alpha-2-macroglobulin receptor)
hSQ028928	4035	GGACATGGGCCTGAGCACGATCAGCCGGGCCAAGCGGGACCAGACGTGGCGTGAAGACGTGGTGACCAAT	PC Details: [Tiling]	chr12_+_55808542_55893390	LRP1	A2MR|APOER|APR|CD91|LRP|MGC88725|TGFBR5	low density lipoprotein-related protein 1 (alpha-2-macroglobulin receptor)
hSQ020081	4035	CTCTGCCTGCCCACGTCAGAGACGACCCGCTCCTGCATGTGCACAGCCGGCTATAGCCTCCGGAGTGGCC	PC Details: [Tiling]	chr12_+_55808542_55893390	LRP1	A2MR|APOER|APR|CD91|LRP|MGC88725|TGFBR5	low density lipoprotein-related protein 1 (alpha-2-macroglobulin receptor)
hSQ018044	4035	CGATGGTGACAACATCAGCATGGCCAACATGGATGGCAGCAATCGCACCCTGCTCTTCAGTGGCCAGAAG	PC Details: [Tiling]	chr12_+_55808542_55893390	LRP1	A2MR|APOER|APR|CD91|LRP|MGC88725|TGFBR5	low density lipoprotein-related protein 1 (alpha-2-macroglobulin receptor)
hSQ012590	4035	CACTGGCTAAGGCCAACAAGTGGACCGGCCACAATGTCACCGTGGTACAGAGGACCAACACCCAGCCCTT	PC Details: [Tiling]	chr12_+_55808542_55893390	LRP1	A2MR|APOER|APR|CD91|LRP|MGC88725|TGFBR5	low density lipoprotein-related protein 1 (alpha-2-macroglobulin receptor)
hSQ040192	4035	TGCCAAGCATCTCAAATGCAGCCAAAAGTGCGACCAGAACAAGTTCAGCGTGAAGTGCTCCTGCTACGAG	PC Details: [Tiling]	chr12_+_55808542_55893390	LRP1	A2MR|APOER|APR|CD91|LRP|MGC88725|TGFBR5	low density lipoprotein-related protein 1 (alpha-2-macroglobulin receptor)
hSQ040752	4035	TGCTTCCCCCTGACTCAGTTTACCTGCAACAATGGCAGATGTATCAACATCAACTGGAGATGCGACAATG	PC Details: [Tiling]	chr12_+_55808542_55893390	LRP1	A2MR|APOER|APR|CD91|LRP|MGC88725|TGFBR5	low density lipoprotein-related protein 1 (alpha-2-macroglobulin receptor)
hSQ012255	4035	CACCCCTGGGAGCCGCCAGTGCGCCTGTGCTGAGGACCAGGTGTTGGACGCAGACGGCGTCACTTGCTTG	PC Details: [Tiling]	chr12_+_55808542_55893390	LRP1	A2MR|APOER|APR|CD91|LRP|MGC88725|TGFBR5	low density lipoprotein-related protein 1 (alpha-2-macroglobulin receptor)
hSQ010785	4035	ATTGAAAACCTCATGAACCCCCGAGCCCTGGACTTCCACGCTGAGACCGGCTTCATCTACTTTGCCGACA	PC Details: [Tiling]	chr12_+_55808542_55893390	LRP1	A2MR|APOER|APR|CD91|LRP|MGC88725|TGFBR5	low density lipoprotein-related protein 1 (alpha-2-macroglobulin receptor)
hSQ029577	4035	GGCAACTTCTACTTTGTGGATGACATCGATGATAGGATCTTTGTCTGCAACAGAAATGGGGACACATGTG	PC Details: [Tiling]	chr12_+_55808542_55893390	LRP1	A2MR|APOER|APR|CD91|LRP|MGC88725|TGFBR5	low density lipoprotein-related protein 1 (alpha-2-macroglobulin receptor)
hSQ009956	4035	ATGCCAGCCAAACGAGCATAACTGCCTGGGTACTGAGCTGTGTGTTCCCATGTCCCGCCTCTGCAATGGG	PC Details: [Tiling]	chr12_+_55808542_55893390	LRP1	A2MR|APOER|APR|CD91|LRP|MGC88725|TGFBR5	low density lipoprotein-related protein 1 (alpha-2-macroglobulin receptor)
hSQ012541	6908	CACTGAGAACACCGCGCAGCGTGACTGTGAGTTGCTCATACCGTGCTGCTATCTGGGCAGCGCTGCCCAT	PC Details: [Mismatch Controls; Wild-Type]	chr6_+_170781090_170799578	TBP	GTF2D|GTF2D1|MGC117320|MGC126054|MGC126055|SCA17|TFIID	TATA box binding protein
hSQ040268	3145	TGCCCAGCATGAAGATGGCCCTGAGGATGACCCACAGTTGGTAGGCATCACTGCTCGTAACATTCCACGA	PC Details: [Mismatch Controls; Wild-Type]	chr11_+_118443700_118469468	HMBS	PBG-D|PBGD|UPS	hydroxymethylbilane synthase
hSQ038017	6389	TCCTTTGTGGACGTTGGCACTGGGAAGGTCACTCTGGAATATAGACCCGTAATCGACAAAACTTTGAACG	PC Details: [Mismatch Controls; Wild-Type]	chr5_-_1625375_1627469	SDHA	FP|SDH2|SDHF	succinate dehydrogenase complex, subunit A, flavoprotein (Fp)
hSQ021313	3251	CTGTTTATTTGCACTATGAGCCTATAGACTATCAGTTCCCTTTGGGCGGATTGTTGTTTAACTTGTAAAT	PC Details: [Mismatch Controls; Wild-Type]	chrX_+_133319776_133360216	HPRT1	HGPRT|HPRT	hypoxanthine phosphoribosyltransferase 1 (Lesch-Nyhan syndrome)
hSQ004873	3251	ACGTTTATTTGCACTATGAGCCTATAGACTATCAGTTCCCTTTGGGCGGATTGTTGTTTAACTTGTAAGC	PC Details: [Mismatch Controls; Anchored]	chrX_+_133319776_133360216	HPRT1	HGPRT|HPRT	hypoxanthine phosphoribosyltransferase 1 (Lesch-Nyhan syndrome)
hSQ012437	3251	CACGTTGTCCGCACTATGAGCCTATAGACTATCAGTTCCCTTTGGGCGGATTGTTGTTTCGTCTGCGGGG	PC Details: [Mismatch Controls; Anchored]	chrX_+_133319776_133360216	HPRT1	HGPRT|HPRT	hypoxanthine phosphoribosyltransferase 1 (Lesch-Nyhan syndrome)
hSQ007040	7094	AGCTGAGGGGCTGCGCATGGCCACCAATGCAGCTGCGCAGAATGCCATCAAGAAAAAGCTGGTGCAGCGC	PC Details: [Tiling]	chr9_-_35687333_35722367	TLN1	ILWEQ|KIAA1027|TLN	talin 1
hSQ018999	7094	CTACAATCAGCTCACCTGTCTGCCAAGAGCAACTGGTGGAGGCTGGACGACTGGTAGCCAAAGCCGTGGA	PC Details: [Tiling]	chr9_-_35687333_35722367	TLN1	ILWEQ|KIAA1027|TLN	talin 1
hSQ039958	7094	TGCAAGCAGCTGGGAACGTGGGCCAGGCCAGTGGGGAGCTGTTGCAACAAATTGGGGAAAGTGATACTGA	PC Details: [Tiling]	chr9_-_35687333_35722367	TLN1	ILWEQ|KIAA1027|TLN	talin 1
hSQ018950	7094	CTAAGGCCTGGCGTAAAAACAAGATGGATGAATCAAAGCATGAGATCCACTCTCAGGTAGATGCCATCAC	PC Details: [Tiling]	chr9_-_35687333_35722367	TLN1	ILWEQ|KIAA1027|TLN	talin 1
hSQ038874	7094	TCTGTGGCCCTGCCTGCCATCATGCGCTCTGGAGCCTCTGGTCCTGAGAATTTCCAGGTGGGCAGCATGC	PC Details: [Tiling]	chr9_-_35687333_35722367	TLN1	ILWEQ|KIAA1027|TLN	talin 1
hSQ007992	7094	AGTACAGACAACTGAAGGGGAGCAGATTGCACAGCTCATTGCCGGCTACATCGATATCATCCTGAAGAAG	PC Details: [Tiling]	chr9_-_35687333_35722367	TLN1	ILWEQ|KIAA1027|TLN	talin 1
hSQ007505	7094	AGGCCAAGGTCCGCTACGTGAAGCTAGCCCGTTCTCTCAAGACTTACGGTGTCTCCTTCTTCCTGGTGAA	PC Details: [Tiling]	chr9_-_35687333_35722367	TLN1	ILWEQ|KIAA1027|TLN	talin 1
hSQ020262	7094	CTGAATGGCTCCCACCCTGTCTCCTTTGACAAGGCCTGTGAGTTTGCTGGCTTCCAATGCCAGATCCAGT	PC Details: [Tiling]	chr9_-_35687333_35722367	TLN1	ILWEQ|KIAA1027|TLN	talin 1
hSQ007366	7094	AGGAGGAAATAACAGGGACCTTAAGAAAGGACAAGACATTGCTGCGAGATGAAAAGAAGATGGAGAAACT	PC Details: [Tiling]	chr9_-_35687333_35722367	TLN1	ILWEQ|KIAA1027|TLN	talin 1
hSQ012943	7094	CAGATGATGACCCCAAAAAGGGTATATGGCTGGAGGCTGGGAAAGCTTTGGACTACTACATGCTCCGAAA	PC Details: [Tiling]	chr9_-_35687333_35722367	TLN1	ILWEQ|KIAA1027|TLN	talin 1
hSQ036429	4035	TATTGACTTCCCTGAAAGCAAACTCTACTGGATCAGCTCCGGGAACCATACCATCAACCGCTGCAACCTG	PC Details: [Tiling]	chr12_+_55808542_55893390	LRP1	A2MR|APOER|APR|CD91|LRP|MGC88725|TGFBR5	low density lipoprotein-related protein 1 (alpha-2-macroglobulin receptor)
hSQ004605	4035	ACCTGTGTCTCATCAACTACAACCGGACCGTGTCCTGCGCCTGCCCCCACCTCATGAAGCTCCACAAGGA	PC Details: [Tiling]	chr12_+_55808542_55893390	LRP1	A2MR|APOER|APR|CD91|LRP|MGC88725|TGFBR5	low density lipoprotein-related protein 1 (alpha-2-macroglobulin receptor)
hSQ037115	4035	TCATCATTTTCTCCAACCGCCATGAAATCCGGCGCATCGATCTTCACAAAGGAGACTACAGCGTCCTGGT	PC Details: [Tiling]	chr12_+_55808542_55893390	LRP1	A2MR|APOER|APR|CD91|LRP|MGC88725|TGFBR5	low density lipoprotein-related protein 1 (alpha-2-macroglobulin receptor)
hSQ020508	4035	CTGCAGCCACTCCTGTTCTAGCACCCAGTTCAAGTGCAACAGCGGGCGTTGCATCCCCGAGCACTGGACC	PC Details: [Tiling]	chr12_+_55808542_55893390	LRP1	A2MR|APOER|APR|CD91|LRP|MGC88725|TGFBR5	low density lipoprotein-related protein 1 (alpha-2-macroglobulin receptor)
hSQ009258	4035	ATCCAGGAGCGCTGGAAGTGTGACGGAGACAACGATTGCCTGGACAACAGTGATGAGGCCCCAGCCCTCT	PC Details: [Tiling]	chr12_+_55808542_55893390	LRP1	A2MR|APOER|APR|CD91|LRP|MGC88725|TGFBR5	low density lipoprotein-related protein 1 (alpha-2-macroglobulin receptor)
hSQ031725	4035	GGTGTGGCCGTGGACTGGATGGGAGACAATCTGTACTGGACGGACGATGGGCCCAAAAAGACAATCAGCG	PC Details: [Tiling]	chr12_+_55808542_55893390	LRP1	A2MR|APOER|APR|CD91|LRP|MGC88725|TGFBR5	low density lipoprotein-related protein 1 (alpha-2-macroglobulin receptor)
hSQ011341	4035	CAAAGGTGGAACGCTGTGACATGGATGGGCAGAACCGCACCAAGCTCGTCGACAGCAAGATTGTGTTTCC	PC Details: [Tiling]	chr12_+_55808542_55893390	LRP1	A2MR|APOER|APR|CD91|LRP|MGC88725|TGFBR5	low density lipoprotein-related protein 1 (alpha-2-macroglobulin receptor)
hSQ003604	4035	ACACTCGATGGGCCCACCTGCTACTGCAACAGCAGCTTTCAGCTTCAGGCAGATGGCAAGACCTGCAAAG	PC Details: [Tiling]	chr12_+_55808542_55893390	LRP1	A2MR|APOER|APR|CD91|LRP|MGC88725|TGFBR5	low density lipoprotein-related protein 1 (alpha-2-macroglobulin receptor)
hSQ040268	3145	TGCCCAGCATGAAGATGGCCCTGAGGATGACCCACAGTTGGTAGGCATCACTGCTCGTAACATTCCACGA	PC Details: [Mismatch Controls; Wild-Type]	chr11_+_118443700_118469468	HMBS	PBG-D|PBGD|UPS	hydroxymethylbilane synthase
hSQ038017	6389	TCCTTTGTGGACGTTGGCACTGGGAAGGTCACTCTGGAATATAGACCCGTAATCGACAAAACTTTGAACG	PC Details: [Mismatch Controls; Wild-Type]	chr5_-_1625375_1627469	SDHA	FP|SDH2|SDHF	succinate dehydrogenase complex, subunit A, flavoprotein (Fp)
hSQ021313	3251	CTGTTTATTTGCACTATGAGCCTATAGACTATCAGTTCCCTTTGGGCGGATTGTTGTTTAACTTGTAAAT	PC Details: [Mismatch Controls; Wild-Type]	chrX_+_133319776_133360216	HPRT1	HGPRT|HPRT	hypoxanthine phosphoribosyltransferase 1 (Lesch-Nyhan syndrome)
hSQ002555	567	AAGTGGGATCGAGACATGTAAGCAGCATCATGGAGGTTTGAAGATGCCGCATTTGGATTGGATGAATTCC	PC Details: [Mismatch Controls; Wild-Type]	chr15_+_42791008_42797634	B2M	-	beta-2-microglobulin
hSQ037238	3251	TCATTTATTTGCACTATGAGCCTATAGACTATCAGTTCCCTTTGGGCGGATTGTTGTTTAACTTGTGGCC	PC Details: [Mismatch Controls; Anchored]	chrX_+_133319776_133360216	HPRT1	HGPRT|HPRT	hypoxanthine phosphoribosyltransferase 1 (Lesch-Nyhan syndrome)
hSQ019744	3251	CTCCCGATTTGCACTATGAGCCTATAGACTATCAGTTCCCTTTGGGCGGATTGTTGTTTAACTCGGACAC	PC Details: [Mismatch Controls; Anchored]	chrX_+_133319776_133360216	HPRT1	HGPRT|HPRT	hypoxanthine phosphoribosyltransferase 1 (Lesch-Nyhan syndrome)
hSQ042920	3251	TTAGTTGCTCGAGGCGCGAGCCTATAGACTATCAGTTCCCTTTGGGCGGATTGCCACCCGTTCCATGAGT	PC Details: [Mismatch Controls; Anchored]	chrX_+_133319776_133360216	HPRT1	HGPRT|HPRT	hypoxanthine phosphoribosyltransferase 1 (Lesch-Nyhan syndrome)
hSQ035767	3251	TAGCCAACCGCTATAGCACATCTATAGACTATCAGTTCCCTTTGGGCGGGTTGCCAATCGGTGCAAGGGT	PC Details: [Mismatch Controls; Anchored]	.	HPRT1	HGPRT|HPRT	hypoxanthine phosphoribosyltransferase 1 (Lesch-Nyhan syndrome)
hSQ011499	3251	CAACGCGCGAAGGGTGCAGACACATAGACTATCAGTTCCCTTTGGGTTCCCAGCTGCCCTGTTCACGAAC	PC Details: [Mismatch Controls; Anchored]	.	HPRT1	HGPRT|HPRT	hypoxanthine phosphoribosyltransferase 1 (Lesch-Nyhan syndrome)
hSQ038133	3251	TCGCTGGGCCTTGTCGACGGCCTAAGTATCATCAGTTCTCTACCTTCTGGATCCTATCCAGTCTGCGGGT	PC Details: [Mismatch Controls; Anchored]	.	HPRT1	HGPRT|HPRT	hypoxanthine phosphoribosyltransferase 1 (Lesch-Nyhan syndrome)
hSQ018839	6908	CGTTGAGAACACCGCGCAGCGTGACTGTGAGTTGCTCATACCGTGCTGCTATCTGGGCAGCGCTGCTTGG	PC Details: [Mismatch Controls; Anchored]	chr6_+_170781090_170799578	TBP	GTF2D|GTF2D1|MGC117320|MGC126054|MGC126055|SCA17|TFIID	TATA box binding protein
hSQ031952	6908	GTAAAGAAACACCGCGCAGCGTGACTGTGAGTTGCTCATACCGTGCTGCTATCTGGGCAGCGCACTTTGC	PC Details: [Mismatch Controls; Anchored]	chr6_+_170781090_170799578	TBP	GTF2D|GTF2D1|MGC117320|MGC126054|MGC126055|SCA17|TFIID	TATA box binding protein
hSQ008059	6908	AGTCAAGGATAATGCGCAGCGTGACTGTGAGTTGCTCATACCGTGCTGCTATCTGGATGTTACAACCGAT	PC Details: [Mismatch Controls; Anchored]	chr6_+_170781090_170799578	TBP	GTF2D|GTF2D1|MGC117320|MGC126054|MGC126055|SCA17|TFIID	TATA box binding protein
hSQ038535	6908	TCTCGGACGGGCTGGGTAGCGTGACTGTGAGTTGCTCATACCGTGCTGCTATAAGGTTGAGGTTGTCCGT	PC Details: [Mismatch Controls; Anchored]	chr6_+_170781090_170799578	TBP	GTF2D|GTF2D1|MGC117320|MGC126054|MGC126055|SCA17|TFIID	TATA box binding protein
hSQ008387	6908	AGTTAGGATTACTACGTTATATGACTGTGAGTTGCTCATACCGTGCTGCGGCTGCAACGAAATTACCTTA	PC Details: [Mismatch Controls; Anchored]	.	TBP	GTF2D|GTF2D1|MGC117320|MGC126054|MGC126055|SCA17|TFIID	TATA box binding protein
hSQ012199	6908	CACCAGTAGCGCGGGGAGTGTAGGCAACGAGTTGCTCATACCACGTCATTGAAAATATATAATCTTTAGG	PC Details: [Mismatch Controls; Anchored]	.	TBP	GTF2D|GTF2D1|MGC117320|MGC126054|MGC126055|SCA17|TFIID	TATA box binding protein
hSQ042320	6908	TGTTAGAGGCATGATGGAATGCAGTGAAACATTGCTCACGCTGTGGCATTCTCTAAAACGTGCGATTAGC	PC Details: [Mismatch Controls; Anchored]	.	TBP	GTF2D|GTF2D1|MGC117320|MGC126054|MGC126055|SCA17|TFIID	TATA box binding protein
hSQ018137	3145	CGCCCAGCATGAAGATGGCCCTGAGGATGACCCACAGTTGGTAGGCATCACTGCTCGTAACATTCCACCG	PC Details: [Mismatch Controls; Anchored]	chr11_+_118443700_118469468	HMBS	PBG-D|PBGD|UPS	hydroxymethylbilane synthase
hSQ012644	3145	CACTTGAGGAGAAGATGGCCCTGAGGATGACCCACAGTTGGTAGGCATCACTGCTCGTAAAGAAAAACAG	PC Details: [Mismatch Controls; Anchored]	chr11_+_118443700_118469468	HMBS	PBG-D|PBGD|UPS	hydroxymethylbilane synthase
hSQ017037	3145	CCTCCGAAGGAGTAATGGCCCTGAGGATGACCCACAGTTGGTAGGCATCACTGCTCACGGGGGCGGCTTG	PC Details: [Mismatch Controls; Anchored]	chr11_+_118443700_118469468	HMBS	PBG-D|PBGD|UPS	hydroxymethylbilane synthase
hSQ018845	3145	CGTTGGCTACGAGTGCGGCCCTGAGGATGACCCACAGTTGGTAGGCATCACTTTCCTCGGTGCTTCGTTG	PC Details: [Mismatch Controls; Anchored]	chr11_+_118443700_118469468	HMBS	PBG-D|PBGD|UPS	hydroxymethylbilane synthase
hSQ031343	3145	GGTAGTGTGCAGGAACGCTAATTAGGATGACCCACAGTTGGTAGGAGGTCAGGTTCAAAGGGTCTTTCAG	PC Details: [Mismatch Controls; Anchored]	.	HMBS	PBG-D|PBGD|UPS	hydroxymethylbilane synthase
hSQ022208	3145	CTTTTGGCGCTATATTGAACACGAAGGCGACCCACAGTTGGTAGAGGCCGTTAGATAGCGTGTATAAGAA	PC Details: [Mismatch Controls; Anchored]	.	HMBS	PBG-D|PBGD|UPS	hydroxymethylbilane synthase
hSQ025312	3145	GATTACATGTACGAGTAAATTTAGGGTGATTCCACAGTCTGCGGATACTGTTATACGGTATATCGTGTGG	PC Details: [Mismatch Controls; Anchored]	.	HMBS	PBG-D|PBGD|UPS	hydroxymethylbilane synthase
hSQ043650	6389	TTCGTTGTGGACGTTGGCACTGGGAAGGTCACTCTGGAATATAGACCCGTAATCGACAAAACTATAGGAA	PC Details: [Mismatch Controls; Anchored]	chr5_-_1625375_1627469	SDHA	FP|SDH2|SDHF	succinate dehydrogenase complex, subunit A, flavoprotein (Fp)
hSQ004311	6389	ACCCCGCATAACGTTGGCACTGGGAAGGTCACTCTGGAATATAGACCCGTAATCGACAAAGTTCCAGCTA	PC Details: [Mismatch Controls; Anchored]	.	SDHA	FP|SDH2|SDHF	succinate dehydrogenase complex, subunit A, flavoprotein (Fp)
hSQ008835	6389	ATAGCTGCAGTTAGTGGCACTGGGAAGGTCACTCTGGAATATAGACCCGTAATCGATTGGGTCCTGGATA	PC Details: [Mismatch Controls; Anchored]	.	SDHA	FP|SDH2|SDHF	succinate dehydrogenase complex, subunit A, flavoprotein (Fp)
hSQ013965	6389	CATCGGCGAAGCGCCAGTTTTGGGAAGGTCACTCTGGAATATAGACCCGCGGTCGGAAGGGGCGCCAGCA	PC Details: [Mismatch Controls; Anchored]	.	SDHA	FP|SDH2|SDHF	succinate dehydrogenase complex, subunit A, flavoprotein (Fp)
hSQ034156	6389	GTTCGCAGACGTACAACCCCCAAAAAGGTCACTCTGGAATATAGATCATAGCTTAATAGGATCCCTGGCC	PC Details: [Mismatch Controls; Anchored]	.	SDHA	FP|SDH2|SDHF	succinate dehydrogenase complex, subunit A, flavoprotein (Fp)
hSQ017070	6389	CCTCGCGTAACTTTGAACGTTCGTGGGTTCACTCTGGAATATGGACCCGCGGCCATAGGGATCCTATACA	PC Details: [Mismatch Controls; Anchored]	.	SDHA	FP|SDH2|SDHF	succinate dehydrogenase complex, subunit A, flavoprotein (Fp)
hSQ003831	3251	ACAGTCACTTACGTTATGAGCCTATAGACTATCAGTTCCCTTTGGGCGGATTGTTGGCCGCAACTTAGGT	PC Details: [Mismatch Controls; Anchored]	chrX_+_133319776_133360216	HPRT1	HGPRT|HPRT	hypoxanthine phosphoribosyltransferase 1 (Lesch-Nyhan syndrome)
hSQ016510	3251	CCGCCAAACTAGGCTATATATCTATAGACTATCAGTTCCCTTTGGGCGGGCTACGCCCAGGTGTGGGTGC	PC Details: [Mismatch Controls; Anchored]	.	HPRT1	HGPRT|HPRT	hypoxanthine phosphoribosyltransferase 1 (Lesch-Nyhan syndrome)
hSQ038077	3251	TCGCACGCCCACGTCACCGACTAGTAGACTATCAGTTCCCTTTGGATGCTAAACCACCGAGAGTCCGGGG	PC Details: [Mismatch Controls; Anchored]	.	HPRT1	HGPRT|HPRT	hypoxanthine phosphoribosyltransferase 1 (Lesch-Nyhan syndrome)
hSQ035932	3251	TAGTCTGCTCATGTCGCTGGTCCACGAGCTATCAGTTCCCTTCTGCCCAGACATCCCGCGACTTATGAGC	PC Details: [Mismatch Controls; Anchored]	.	HPRT1	HGPRT|HPRT	hypoxanthine phosphoribosyltransferase 1 (Lesch-Nyhan syndrome)
hSQ018262	6908	CGCTGAGAACACCGCGCAGCGTGACTGTGAGTTGCTCATACCGTGCTGCTATCTGGGCAGCGCTGCTTGC	PC Details: [Mismatch Controls; Anchored]	chr6_+_170781090_170799578	TBP	GTF2D|GTF2D1|MGC117320|MGC126054|MGC126055|SCA17|TFIID	TATA box binding protein
hSQ036111	6908	TATCAGAAACACCGCGCAGCGTGACTGTGAGTTGCTCATACCGTGCTGCTATCTGGGCAGCGCGATTCAA	PC Details: [Mismatch Controls; Anchored]	chr6_+_170781090_170799578	TBP	GTF2D|GTF2D1|MGC117320|MGC126054|MGC126055|SCA17|TFIID	TATA box binding protein
hSQ038534	6908	TCTCGGAAGTACCGCGCAGCGTGACTGTGAGTTGCTCATACCGTGCTGCTATCTGGGCAACCTCACTATT	PC Details: [Mismatch Controls; Anchored]	chr6_+_170781090_170799578	TBP	GTF2D|GTF2D1|MGC117320|MGC126054|MGC126055|SCA17|TFIID	TATA box binding protein
hSQ018006	6908	CGAGGTATTTGCTATGTAGCGTGACTGTGAGTTGCTCATACCGTGCTGCTATACGAAGAGCGCCCCTTAC	PC Details: [Mismatch Controls; Anchored]	chr6_+_170781090_170799578	TBP	GTF2D|GTF2D1|MGC117320|MGC126054|MGC126055|SCA17|TFIID	TATA box binding protein
hSQ043683	6908	TTCTAGCCGGGTTATAACCTTTGACTGTGAGTTGCTCATACCGTGCTGCCATGAACAATATATTGATCAG	PC Details: [Mismatch Controls; Anchored]	.	TBP	GTF2D|GTF2D1|MGC117320|MGC126054|MGC126055|SCA17|TFIID	TATA box binding protein
hSQ036114	6908	TATCAGACGTGCTATTTCGAATCTCTGTGAGTTGCTCATACCGTGACCCAATGCAAATACTACCCCTTCA	PC Details: [Mismatch Controls; Anchored]	.	TBP	GTF2D|GTF2D1|MGC117320|MGC126054|MGC126055|SCA17|TFIID	TATA box binding protein
hSQ040433	6908	TGCGACACTCACTGTGGGCCAGGGTCACAGATTGCTCATGCAACAACATCGCTCAAATGTCAGAATGTAC	PC Details: [Mismatch Controls; Anchored]	.	TBP	GTF2D|GTF2D1|MGC117320|MGC126054|MGC126055|SCA17|TFIID	TATA box binding protein
hSQ037551	3145	TCCCCAGCATGAAGATGGCCCTGAGGATGACCCACAGTTGGTAGGCATCACTGCTCGTAACATTCCGTGA	PC Details: [Mismatch Controls; Anchored]	chr11_+_118443700_118469468	HMBS	PBG-D|PBGD|UPS	hydroxymethylbilane synthase
hSQ012658	3145	CACTTTACATGAAGATGGCCCTGAGGATGACCCACAGTTGGTAGGCATCACTGCTCGTAACATTTCAATG	PC Details: [Mismatch Controls; Anchored]	chr11_+_118443700_118469468	HMBS	PBG-D|PBGD|UPS	hydroxymethylbilane synthase
hSQ025030	3145	GATCTGACGCAGGGATGGCCCTGAGGATGACCCACAGTTGGTAGGCATCACTGCTCAAGTTGGCATTTAG	PC Details: [Mismatch Controls; Anchored]	chr11_+_118443700_118469468	HMBS	PBG-D|PBGD|UPS	hydroxymethylbilane synthase
hSQ013194	3145	CAGCTCATACAGAGATAGCCCTGAGGATGACCCACAGTTGGTAGGCATCACTATCCATAGGACTATATCA	PC Details: [Mismatch Controls; Anchored]	chr11_+_118443700_118469468	HMBS	PBG-D|PBGD|UPS	hydroxymethylbilane synthase
hSQ035334	3145	TACATGGTACTAATTCAATCTTGAGGATGACCCACAGTTGGTAGGCATCGCCTTTGAGCGGCCGTTACGC	PC Details: [Mismatch Controls; Anchored]	.	HMBS	PBG-D|PBGD|UPS	hydroxymethylbilane synthase
hSQ041697	3145	TGGTTGATGGAGCAGCAATTCATGGACCGACCCACAGTTGGTATATGACGCTATGTTCGGTTAGCCGTAG	PC Details: [Mismatch Controls; Anchored]	.	HMBS	PBG-D|PBGD|UPS	hydroxymethylbilane synthase
hSQ039063	3145	TCTTTCCTGCCGAAGCAACTCCAGGAACAGTCCACAGTCGACGAGTATTGTTATCCACACAGCCTAGCAA	PC Details: [Mismatch Controls; Anchored]	.	HMBS	PBG-D|PBGD|UPS	hydroxymethylbilane synthase
hSQ017849	6389	CCTTTTGTGGACGTTGGCACTGGGAAGGTCACTCTGGAATATAGACCCGTAATCGACAAAACTTTGGAGA	PC Details: [Mismatch Controls; Anchored]	chr5_-_1625375_1627469	SDHA	FP|SDH2|SDHF	succinate dehydrogenase complex, subunit A, flavoprotein (Fp)
hSQ043431	6389	TTCCCTACACACGTTGGCACTGGGAAGGTCACTCTGGAATATAGACCCGTAATCGACAATATCGTAGCTA	PC Details: [Mismatch Controls; Anchored]	.	SDHA	FP|SDH2|SDHF	succinate dehydrogenase complex, subunit A, flavoprotein (Fp)
hSQ018817	6389	CGTTACACAAATCCTGGCACTGGGAAGGTCACTCTGGAATATAGACCCGTAATCGATAACATCTCTGGCG	PC Details: [Mismatch Controls; Anchored]	.	SDHA	FP|SDH2|SDHF	succinate dehydrogenase complex, subunit A, flavoprotein (Fp)
hSQ018152	6389	CGCCCTACATCTGCGCACACTGGGAAGGTCACTCTGGAATATAGACCCGTAAACAGCTAGGTCTCCAGCA	PC Details: [Mismatch Controls; Anchored]	.	SDHA	FP|SDH2|SDHF	succinate dehydrogenase complex, subunit A, flavoprotein (Fp)
hSQ038543	6389	TCTCGTACAAGTAGAAACGCCAAAAAGGTCACTCTGGAATATAGACTTATGACCAGGGCGGCTCCGCGTC	PC Details: [Mismatch Controls; Anchored]	.	SDHA	FP|SDH2|SDHF	succinate dehydrogenase complex, subunit A, flavoprotein (Fp)
hSQ023583	6389	GACCGCACGTATATCAGCGTTTAGGGCTTCACTCTGGAATATGAGCTTTTGGTTTGTCCAATTGCACATG	PC Details: [Mismatch Controls; Anchored]	.	SDHA	FP|SDH2|SDHF	succinate dehydrogenase complex, subunit A, flavoprotein (Fp)
hSQ038104	3251	TCGCCTGCCCCCATTATGAGCCTATAGACTATCAGTTCCCTTTGGGCGGATTGTTGTATCGAGTAGGTTC	PC Details: [Mismatch Controls; Anchored]	chrX_+_133319776_133360216	HPRT1	HGPRT|HPRT	hypoxanthine phosphoribosyltransferase 1 (Lesch-Nyhan syndrome)
hSQ037687	3251	TCCCTTATCCGCAGTGAGAGCCTATAGACTATCAGTTCCCTTTGGGCGGATTACTAGCAAGCCCGATGGC	PC Details: [Mismatch Controls; Anchored]	chrX_+_133319776_133360216	HPRT1	HGPRT|HPRT	hypoxanthine phosphoribosyltransferase 1 (Lesch-Nyhan syndrome)
hSQ036917	3251	TCAGATACCTATGTCATATGTTACTAGACTATCAGTTCCCTTTGGTTTAGCCACTGGCCGGTGTACGCGC	PC Details: [Mismatch Controls; Anchored]	.	HPRT1	HGPRT|HPRT	hypoxanthine phosphoribosyltransferase 1 (Lesch-Nyhan syndrome)
hSQ038076	3251	TCGCACATCTGTGTCGCAGCTTCCCGAGCTATCAGTTCCCTTTGAAGATGCTTTGACTATCCCCATGAGG	PC Details: [Mismatch Controls; Anchored]	.	HPRT1	HGPRT|HPRT	hypoxanthine phosphoribosyltransferase 1 (Lesch-Nyhan syndrome)
hSQ015338	3251	CCATCCACCTACACAAGACTCTGACCAGAGGTCAGTTCTCTCGGTATGGCTCGTCATCCGGTCGGTGGGT	PC Details: [Mismatch Controls; Anchored]	.	HPRT1	HGPRT|HPRT	hypoxanthine phosphoribosyltransferase 1 (Lesch-Nyhan syndrome)
hSQ035805	6908	TAGCTGAAACACCGCGCAGCGTGACTGTGAGTTGCTCATACCGTGCTGCTATCTGGGCAGCGCCATTGAC	PC Details: [Mismatch Controls; Anchored]	chr6_+_170781090_170799578	TBP	GTF2D|GTF2D1|MGC117320|MGC126054|MGC126055|SCA17|TFIID	TATA box binding protein
hSQ043609	6908	TTCGCGAACTACCGCGCAGCGTGACTGTGAGTTGCTCATACCGTGCTGCTATCTGGGCAGGACACAATCT	PC Details: [Mismatch Controls; Anchored]	chr6_+_170781090_170799578	TBP	GTF2D|GTF2D1|MGC117320|MGC126054|MGC126055|SCA17|TFIID	TATA box binding protein
hSQ035558	6908	TACTGCAGGTCTTACGCAGCGTGACTGTGAGTTGCTCATACCGTGCTGCTATCTGGTTGACATGACGTAC	PC Details: [Mismatch Controls; Anchored]	chr6_+_170781090_170799578	TBP	GTF2D|GTF2D1|MGC117320|MGC126054|MGC126055|SCA17|TFIID	TATA box binding protein
hSQ041892	6908	TGTCACATATGGTTCACGGTATGACTGTGAGTTGCTCATACCGTGCTGCTTCTCTGTTAAGATCATAGAC	PC Details: [Mismatch Controls; Anchored]	.	TBP	GTF2D|GTF2D1|MGC117320|MGC126054|MGC126055|SCA17|TFIID	TATA box binding protein
hSQ038441	6908	TCTCAGAGATGCTGTATGAAGCAACTGTGAGTTGCTCATACCGTGCGCCCCTCCTGACGGTCTCAAACAT	PC Details: [Mismatch Controls; Anchored]	.	TBP	GTF2D|GTF2D1|MGC117320|MGC126054|MGC126055|SCA17|TFIID	TATA box binding protein
hSQ041280	6908	TGGCTGAGTTGACATGTGATACACTCGCGAGTTGCTCATACCCCCTTACCGTGCTAGTGTTAACCTTCGT	PC Details: [Mismatch Controls; Anchored]	.	TBP	GTF2D|GTF2D1|MGC117320|MGC126054|MGC126055|SCA17|TFIID	TATA box binding protein
hSQ011472	3145	CAACCAGCATGAAGATGGCCCTGAGGATGACCCACAGTTGGTAGGCATCACTGCTCGTAACATTCCCGTG	PC Details: [Mismatch Controls; Anchored]	chr11_+_118443700_118469468	HMBS	PBG-D|PBGD|UPS	hydroxymethylbilane synthase
hSQ042521	3145	TGTTTTTCATGAAGATGGCCCTGAGGATGACCCACAGTTGGTAGGCATCACTGCTCGTAACATCATTTGG	PC Details: [Mismatch Controls; Anchored]	chr11_+_118443700_118469468	HMBS	PBG-D|PBGD|UPS	hydroxymethylbilane synthase
hSQ011855	3145	CAATGGACGAGAAGATGGCCCTGAGGATGACCCACAGTTGGTAGGCATCACTGCTCGTAGTCTAACGCAT	PC Details: [Mismatch Controls; Anchored]	chr11_+_118443700_118469468	HMBS	PBG-D|PBGD|UPS	hydroxymethylbilane synthase
hSQ038223	3145	TCGTCGGAAAAACAGTAGCCCTGAGGATGACCCACAGTTGGTAGGCATCACTGTTCCTGGTGGCTTTTAA	PC Details: [Mismatch Controls; Anchored]	chr11_+_118443700_118469468	HMBS	PBG-D|PBGD|UPS	hydroxymethylbilane synthase
hSQ022633	3145	GAACCGAAGAAGTAGTGACTTTGAGGATGACCCACAGTTGGTAGGCATCGTTTTTTACTGCGCCTTATGA	PC Details: [Mismatch Controls; Anchored]	.	HMBS	PBG-D|PBGD|UPS	hydroxymethylbilane synthase
hSQ035417	3145	TACCGCATACGAAAGTAACTCGTTGGATGACCCACAGTTGGTAGGTATCCCACCCAATGGGGGGCTACAG	PC Details: [Mismatch Controls; Anchored]	.	HMBS	PBG-D|PBGD|UPS	hydroxymethylbilane synthase
hSQ042380	3145	TGTTCGTTAACGTGGCGACTTCACCACTCCTCCACAGTACACAACTCGTTTCGTCCACCATTTTTCGCGC	PC Details: [Mismatch Controls; Anchored]	.	HMBS	PBG-D|PBGD|UPS	hydroxymethylbilane synthase
hSQ033042	6389	GTCTTTGTGGACGTTGGCACTGGGAAGGTCACTCTGGAATATAGACCCGTAATCGACAAAACTTTGAACG	PC Details: [Mismatch Controls; Anchored]	chr5_-_1625375_1627469	SDHA	FP|SDH2|SDHF	succinate dehydrogenase complex, subunit A, flavoprotein (Fp)
hSQ021427	6389	CTTAGGCTGGACGTTGGCACTGGGAAGGTCACTCTGGAATATAGACCCGTAATCGACAAAACTGCATTTC	PC Details: [Mismatch Controls; Anchored]	chr5_-_1625375_1627469	SDHA	FP|SDH2|SDHF	succinate dehydrogenase complex, subunit A, flavoprotein (Fp)
hSQ021411	6389	CTTACTGGAGGCTCTGGCACTGGGAAGGTCACTCTGGAATATAGACCCGTAATCGACGGGCGGGTGGGAA	PC Details: [Mismatch Controls; Anchored]	.	SDHA	FP|SDH2|SDHF	succinate dehydrogenase complex, subunit A, flavoprotein (Fp)
hSQ017668	6389	CCTTCGGGTAGTACTGGCACTGGGAAGGTCACTCTGGAATATAGACCCGTAACGAGGGAGTTCCGAGCCA	PC Details: [Mismatch Controls; Anchored]	.	SDHA	FP|SDH2|SDHF	succinate dehydrogenase complex, subunit A, flavoprotein (Fp)
hSQ021934	6389	CTTGTGAGAGACGCCAATAACGGGAAGGTCACTCTGGAATATAGACCCGCGCCTGTAGGGTTCTGACATG	PC Details: [Mismatch Controls; Anchored]	.	SDHA	FP|SDH2|SDHF	succinate dehydrogenase complex, subunit A, flavoprotein (Fp)
hSQ017643	6389	CCTTCCATGATTACCGATGTCAAAGGTATCACTCTGGAATATATGGCAACGCCTAGGAGAATTCGCAGTG	PC Details: [Mismatch Controls; Anchored]	.	SDHA	FP|SDH2|SDHF	succinate dehydrogenase complex, subunit A, flavoprotein (Fp)
hSQ044183	3251	TTGCCGGTGAAGGCTATGAGCCTATAGACTATCAGTTCCCTTTGGGCGGATTGTTGCGTAGTCACCGACC	PC Details: [Mismatch Controls; Anchored]	chrX_+_133319776_133360216	HPRT1	HGPRT|HPRT	hypoxanthine phosphoribosyltransferase 1 (Lesch-Nyhan syndrome)
hSQ044524	3251	TTGTCTGCTCGTGTTCAGAGCCTATAGACTATCAGTTCCCTTTGGGCGGATTACGTCCTGGCCCGAGGGA	PC Details: [Mismatch Controls; Anchored]	chrX_+_133319776_133360216	HPRT1	HGPRT|HPRT	hypoxanthine phosphoribosyltransferase 1 (Lesch-Nyhan syndrome)
hSQ025763	3251	GCACCTCTCTGTATGCCAGTTCTATAGACTATCAGTTCCCTTTGGGCGGTGCCAGCACGTGTCCGATGGC	PC Details: [Mismatch Controls; Anchored]	.	HPRT1	HGPRT|HPRT	hypoxanthine phosphoribosyltransferase 1 (Lesch-Nyhan syndrome)
hSQ042766	3251	TTACCTGTATGAATCGTTCGTTCGTGGACTATCAGTTCCCTTGATATCGGTCACTGCTCGGTTAACGGGC	PC Details: [Mismatch Controls; Anchored]	.	HPRT1	HGPRT|HPRT	hypoxanthine phosphoribosyltransferase 1 (Lesch-Nyhan syndrome)
hSQ019995	3251	CTCTCAACGCTCTACCAAAGTCCACACGTAGTCAGTTCCCATGACAAGGGCCAACGCATGGTTCGAGGCT	PC Details: [Mismatch Controls; Anchored]	.	HPRT1	HGPRT|HPRT	hypoxanthine phosphoribosyltransferase 1 (Lesch-Nyhan syndrome)
hSQ039826	6908	TGATGAGAACACCGCGCAGCGTGACTGTGAGTTGCTCATACCGTGCTGCTATCTGGGCAGCGCTGCGTAG	PC Details: [Mismatch Controls; Anchored]	chr6_+_170781090_170799578	TBP	GTF2D|GTF2D1|MGC117320|MGC126054|MGC126055|SCA17|TFIID	TATA box binding protein
hSQ037475	6908	TCCCAAAGATACCGCGCAGCGTGACTGTGAGTTGCTCATACCGTGCTGCTATCTGGGCATTGTTGTGCAC	PC Details: [Mismatch Controls; Anchored]	chr6_+_170781090_170799578	TBP	GTF2D|GTF2D1|MGC117320|MGC126054|MGC126055|SCA17|TFIID	TATA box binding protein
hSQ009328	6908	ATCCGCGGATGTAGCGCAGCGTGACTGTGAGTTGCTCATACCGTGCTGCTATCTGGAGAACACTGAGTGT	PC Details: [Mismatch Controls; Anchored]	chr6_+_170781090_170799578	TBP	GTF2D|GTF2D1|MGC117320|MGC126054|MGC126055|SCA17|TFIID	TATA box binding protein
hSQ018669	6908	CGTCAGAGGCCTCGCATAGCGTGACTGTGAGTTGCTCATACCGTGCTGCTATTCTAATCGAACCATTCCC	PC Details: [Mismatch Controls; Anchored]	chr6_+_170781090_170799578	TBP	GTF2D|GTF2D1|MGC117320|MGC126054|MGC126055|SCA17|TFIID	TATA box binding protein
hSQ041896	6908	TGTCACCGGTGATGTATGGCGCAGCTGTGAGTTGCTCATACCGTGTTATCGTTCGCAAGGAGTCATCTGC	PC Details: [Mismatch Controls; Anchored]	.	TBP	GTF2D|GTF2D1|MGC117320|MGC126054|MGC126055|SCA17|TFIID	TATA box binding protein
hSQ006286	6908	AGATGCATATTTTACGCGCCAGAGGCGAGAGTTGCTCATACCACTCCGCTAATCAAATGAATGCATCCAT	PC Details: [Mismatch Controls; Anchored]	.	TBP	GTF2D|GTF2D1|MGC117320|MGC126054|MGC126055|SCA17|TFIID	TATA box binding protein
hSQ040989	6908	TGGAGGCGGAACGACATAAAACGGGCGGTGGTTGCTCACGTCAGAACGCCACCCTATTATTAACATATGA	PC Details: [Mismatch Controls; Anchored]	.	TBP	GTF2D|GTF2D1|MGC117320|MGC126054|MGC126055|SCA17|TFIID	TATA box binding protein
hSQ011536	3145	CAACTGTCATGAAGATGGCCCTGAGGATGACCCACAGTTGGTAGGCATCACTGCTCGTAACATTTAGTTG	PC Details: [Mismatch Controls; Anchored]	chr11_+_118443700_118469468	HMBS	PBG-D|PBGD|UPS	hydroxymethylbilane synthase
hSQ018850	3145	CGTTTATAGTGAAGATGGCCCTGAGGATGACCCACAGTTGGTAGGCATCACTGCTCGTAGCGACTATCGC	PC Details: [Mismatch Controls; Anchored]	chr11_+_118443700_118469468	HMBS	PBG-D|PBGD|UPS	hydroxymethylbilane synthase
hSQ018853	3145	CGTTTCATGCACGAATGGCCCTGAGGATGACCCACAGTTGGTAGGCATCACTGCTCGCTGTGCTTTCTGG	PC Details: [Mismatch Controls; Anchored]	chr11_+_118443700_118469468	HMBS	PBG-D|PBGD|UPS	hydroxymethylbilane synthase
hSQ035611	3145	TACTTGTCGCATGACTACTGCTGAGGATGACCCACAGTTGGTAGGCATCATCACCCCCATTGTTTAGTAG	PC Details: [Mismatch Controls; Anchored]	chr11_+_118443700_118469468	HMBS	PBG-D|PBGD|UPS	hydroxymethylbilane synthase
hSQ018301	3145	CGCTTGACAGGGGGGCATTTCCATGGATGACCCACAGTTGGTAGGAACTGTTCTCGACCCAGACTGGTGG	PC Details: [Mismatch Controls; Anchored]	.	HMBS	PBG-D|PBGD|UPS	hydroxymethylbilane synthase
hSQ002582	3145	AAGTTATTGGCAGGTTAACTCTAAAAGAGACCCACAGTTGGTTAGTATAGTCATGTGCTTTACCCTGCAG	PC Details: [Mismatch Controls; Anchored]	.	HMBS	PBG-D|PBGD|UPS	hydroxymethylbilane synthase
hSQ034616	6389	GTTTTTGTGGACGTTGGCACTGGGAAGGTCACTCTGGAATATAGACCCGTAATCGACAAAACTTTGAGAT	PC Details: [Mismatch Controls; Anchored]	chr5_-_1625375_1627469	SDHA	FP|SDH2|SDHF	succinate dehydrogenase complex, subunit A, flavoprotein (Fp)
hSQ038458	6389	TCTCATATGGACGTTGGCACTGGGAAGGTCACTCTGGAATATAGACCCGTAATCGACAAAACTCCGTGTC	PC Details: [Mismatch Controls; Anchored]	chr5_-_1625375_1627469	SDHA	FP|SDH2|SDHF	succinate dehydrogenase complex, subunit A, flavoprotein (Fp)
hSQ021587	6389	CTTCCCACTGACGTTGGCACTGGGAAGGTCACTCTGGAATATAGACCCGTAATCGACAAGGAGGGACGTC	PC Details: [Mismatch Controls; Anchored]	.	SDHA	FP|SDH2|SDHF	succinate dehydrogenase complex, subunit A, flavoprotein (Fp)
hSQ002893	6389	AATCTGACAGAACACAACACTGGGAAGGTCACTCTGGAATATAGACCCGTAACTAGTGGGGTAGCGGGTA	PC Details: [Mismatch Controls; Anchored]	.	SDHA	FP|SDH2|SDHF	succinate dehydrogenase complex, subunit A, flavoprotein (Fp)
hSQ010846	6389	ATTGCGGCAAGTGCCGGTGCCGGGAAGGTCACTCTGGAATATAGACCCGCTGACAGAGGTCCGCTTTCTA	PC Details: [Mismatch Controls; Anchored]	.	SDHA	FP|SDH2|SDHF	succinate dehydrogenase complex, subunit A, flavoprotein (Fp)
hSQ021599	6389	CTTCCCGCGACTACCAGAGCGGTCAAGGTCACTCTGGAATATAGACCTACGAGCAGTAGGGACCCACTTG	PC Details: [Mismatch Controls; Anchored]	.	SDHA	FP|SDH2|SDHF	succinate dehydrogenase complex, subunit A, flavoprotein (Fp)
hSQ005448	567	ACTTGGGATCGAGACATGTAAGCAGCATCATGGAGGTTTGAAGATGCCGCATTTGGATTGGATGAATCCT	PC Details: [Mismatch Controls; Anchored]	chr15_+_42791008_42797634	B2M	-	beta-2-microglobulin
hSQ000138	567	AAAACGAATCGAGACATGTAAGCAGCATCATGGAGGTTTGAAGATGCCGCATTTGGATTGGATGAAGCTC	PC Details: [Mismatch Controls; Anchored]	chr15_+_42791008_42797634	B2M	-	beta-2-microglobulin
hSQ008799	567	ATAGAGAGTAGAGACATGTAAGCAGCATCATGGAGGTTTGAAGATGCCGCATTTGGATTTACCAGCCCTT	PC Details: [Mismatch Controls; Anchored]	.	B2M	-	beta-2-microglobulin
hSQ030714	567	GGGCAGGGCCAGTGTGCGTAAGCAGCATCATGGAGGTTTGAAGATGCCGCATCAAGCTCTTATAGGGCTT	PC Details: [Mismatch Controls; Anchored]	.	B2M	-	beta-2-microglobulin
hSQ031104	567	GGGTAAGGTGAAATTTCATGAGCAGCATCATGGAGGTTTGAAGATGCCGTTGTAAACACGAACACGTCTT	PC Details: [Mismatch Controls; Anchored]	.	B2M	-	beta-2-microglobulin
hSQ017941	567	CGACGCGCATATAGGTCAATGAAGGCATCATGGAGGTTTGAAGATAAGATCCCGATTCCGGTCGAGTCTT	PC Details: [Mismatch Controls; Anchored]	.	B2M	-	beta-2-microglobulin
hSQ040490	567	TGCGGGAATTCAAGCTCGGGTTAGGTGTTAAGGAGGTTTAGGAGCAATTTTCGCAAGCCAAGCCATTCTT	PC Details: [Mismatch Controls; Anchored]	.	B2M	-	beta-2-microglobulin
hSQ021141	3251	CTGTCTATTTGCACTATGAGCCTATAGACTATCAGTTCCCTTTGGGCGGATTGTTGTTTAACTTGTAAAT	PC Details: [Mismatch Controls; Distributed]	chrX_+_133319776_133360216	HPRT1	HGPRT|HPRT	hypoxanthine phosphoribosyltransferase 1 (Lesch-Nyhan syndrome)
hSQ021312	3251	CTGTTTATTTGCACTATGAGCCTATAGACTATCAGTTCCCTTTGGACGGACTGTTGTTTAACTTGTAAAT	PC Details: [Mismatch Controls; Distributed]	chrX_+_133319776_133360216	HPRT1	HGPRT|HPRT	hypoxanthine phosphoribosyltransferase 1 (Lesch-Nyhan syndrome)
hSQ019369	3251	CTATTTATTTGCACTATGAGCCCGTAGACTATCAGTTCCCTTTGGGTGAATTGTTGTTTAACCTGTAAAT	PC Details: [Mismatch Controls; Distributed]	.	HPRT1	HGPRT|HPRT	hypoxanthine phosphoribosyltransferase 1 (Lesch-Nyhan syndrome)
hSQ021318	3251	CTGTTTATTTGTACTATAAGTTTATAGGCTATCAGTTCCCTTTGGGCGAATTGTTGCTTAACCTGCAAAT	PC Details: [Mismatch Controls; Distributed]	.	HPRT1	HGPRT|HPRT	hypoxanthine phosphoribosyltransferase 1 (Lesch-Nyhan syndrome)
hSQ021154	3251	CTGTCTGTTTGCATTATAAGCCTATAGACTGTTAGTTTCTTTTAGACGGATTGTTGTCTAGCTTGTAAAT	PC Details: [Mismatch Controls; Distributed]	.	HPRT1	HGPRT|HPRT	hypoxanthine phosphoribosyltransferase 1 (Lesch-Nyhan syndrome)
hSQ037129	3251	TCATCTATCTGCACCACGAGCCTGCAAACTATCAACCTCTCTTAGATAGATCATTGCCCAACTCACAAGC	PC Details: [Mismatch Controls; Distributed]	.	HPRT1	HGPRT|HPRT	hypoxanthine phosphoribosyltransferase 1 (Lesch-Nyhan syndrome)
hSQ012538	6908	CACTGAGAACACCGCGCAGCGTGACTGTGAGTTGCTCATACCGTACTGCTATCTGGGCAGCGCTGCCCAT	PC Details: [Mismatch Controls; Distributed]	chr6_+_170781090_170799578	TBP	GTF2D|GTF2D1|MGC117320|MGC126054|MGC126055|SCA17|TFIID	TATA box binding protein
hSQ012539	6908	CACTGAGAACACCGCGCAGCGTGACTGTGAGTTGCTCATACCGTGCTGCCATCTGGGCAGCGCTGCTCAT	PC Details: [Mismatch Controls; Distributed]	chr6_+_170781090_170799578	TBP	GTF2D|GTF2D1|MGC117320|MGC126054|MGC126055|SCA17|TFIID	TATA box binding protein
hSQ012546	6908	CACTGAGAACATTGCGTAGCGTAACTGTGAGTTGCTCATACCGTGCTGCTATCTGGGTAACGCTGCCCAT	PC Details: [Mismatch Controls; Distributed]	.	TBP	GTF2D|GTF2D1|MGC117320|MGC126054|MGC126055|SCA17|TFIID	TATA box binding protein
hSQ012547	6908	CACTGAGAACGCCGCGCAACGTAACTGTGAGTCGCTCATACCGCGCCGTTATCTGGGCAGCGCTGTCTAT	PC Details: [Mismatch Controls; Distributed]	.	TBP	GTF2D|GTF2D1|MGC117320|MGC126054|MGC126055|SCA17|TFIID	TATA box binding protein
hSQ014343	6908	CATTGAGGACACCGTACAGCGTGACCGTAAGCCGCTTGTGCCGTGCTGCTATCTGGGCAGTGCTGCCCAT	PC Details: [Mismatch Controls; Distributed]	.	TBP	GTF2D|GTF2D1|MGC117320|MGC126054|MGC126055|SCA17|TFIID	TATA box binding protein
hSQ035567	6908	TACTGGAAACATCACATAATATAGCTATAGATTGTCCACGCCACGCCACTATTTAAGCAGCGTTGCTTAT	PC Details: [Mismatch Controls; Distributed]	.	TBP	GTF2D|GTF2D1|MGC117320|MGC126054|MGC126055|SCA17|TFIID	TATA box binding protein
hSQ040269	3145	TGCCCAGCATGAAGATGGCCCTGAGGATGACCTACAGTTGGTAGGCATCACTGCTCGTAACATTCCACGA	PC Details: [Mismatch Controls; Distributed]	chr11_+_118443700_118469468	HMBS	PBG-D|PBGD|UPS	hydroxymethylbilane synthase
hSQ040273	3145	TGCCCAGTATGAAGATAGCCCTGAGGATGACCCACAGTTGGTAGGCATCACTGCTCGTAACATTCCACGA	PC Details: [Mismatch Controls; Distributed]	chr11_+_118443700_118469468	HMBS	PBG-D|PBGD|UPS	hydroxymethylbilane synthase
hSQ040266	3145	TGCCCAGCATGAAGATGGCCCTAGGGATAGCCCACGGTTGGTAGGCATCACTGCTCGTAACATTTCACGA	PC Details: [Mismatch Controls; Distributed]	.	HMBS	PBG-D|PBGD|UPS	hydroxymethylbilane synthase
hSQ040263	3145	TGCCCAGCACGAAAATAGTCCTGAGGATAACCCGCAGTCGGTAGGTATCACTGCTCGTAACATTCCACGG	PC Details: [Mismatch Controls; Distributed]	.	HMBS	PBG-D|PBGD|UPS	hydroxymethylbilane synthase
hSQ035426	3145	TACCTAACATAAAGATGGCCTTGAGGATGGCTCGTAGTTGGTAAGCATCACTGTTCATAACATTCCACGA	PC Details: [Mismatch Controls; Distributed]	.	HMBS	PBG-D|PBGD|UPS	hydroxymethylbilane synthase
hSQ034484	6389	GTTTGCACGAGTCCTATCATCAAAGGAACTGCTCTGGAACATGGATGTATGCCTGGCTGTATGCTTCTTA	PC Details: [Mismatch Controls; Anchored]	.	SDHA	FP|SDH2|SDHF	succinate dehydrogenase complex, subunit A, flavoprotein (Fp)
hSQ023490	567	GACCAAAATCGAGACATGTAAGCAGCATCATGGAGGTTTGAAGATGCCGCATTTGGATTGGATGTTAGGC	PC Details: [Mismatch Controls; Anchored]	chr15_+_42791008_42797634	B2M	-	beta-2-microglobulin
hSQ017922	567	CGACATAGCAGAGACATGTAAGCAGCATCATGGAGGTTTGAAGATGCCGCATTTGGATTATGCAGTCGCT	PC Details: [Mismatch Controls; Anchored]	.	B2M	-	beta-2-microglobulin
hSQ022668	567	GAACTAAGAAAGACCATGTAAGCAGCATCATGGAGGTTTGAAGATGCCGCATTTGGGCTCTTAGGGCCTT	PC Details: [Mismatch Controls; Anchored]	.	B2M	-	beta-2-microglobulin
hSQ024343	567	GAGGAAATCCCGAGTGCAAGGGCAGCATCATGGAGGTTTGAAGATGCCGCGCTGAAGACGAGCAGGAGAC	PC Details: [Mismatch Controls; Anchored]	.	B2M	-	beta-2-microglobulin
hSQ000016	567	AAAAAAGGATAAAGTGCTCGTCGTGCATCATGGAGGTTTGAAGATAAGACCTTGAAGCAATACGGGTCTC	PC Details: [Mismatch Controls; Anchored]	.	B2M	-	beta-2-microglobulin
hSQ017937	567	CGACCTATGGAGACTTCAAGCTTTACTCCATGGAGGTTTGAAAGCCGCGGTATCATCCTAAGCGCTTCTT	PC Details: [Mismatch Controls; Anchored]	.	B2M	-	beta-2-microglobulin
hSQ021314	3251	CTGTTTATTTGCACTATGAGCCTGTAGACTATCAGTTCCCTTTGGGCGGATTGTTGTTTAACTTGTAAAT	PC Details: [Mismatch Controls; Distributed]	chrX_+_133319776_133360216	HPRT1	HGPRT|HPRT	hypoxanthine phosphoribosyltransferase 1 (Lesch-Nyhan syndrome)
hSQ021309	3251	CTGTTTATTTGCACCATGAGCCTATAGACTATCAGTTCCCTTTGGGCGGATTGTTGTTTAACTTGTAGAT	PC Details: [Mismatch Controls; Distributed]	chrX_+_133319776_133360216	HPRT1	HGPRT|HPRT	hypoxanthine phosphoribosyltransferase 1 (Lesch-Nyhan syndrome)
hSQ021140	3251	CTGTCTACTTGCACTATGAGCCTATAGACTATCAGTTCCCTTTGGGCGGATTGTTGTTTAACTTGTAAGT	PC Details: [Mismatch Controls; Distributed]	chrX_+_133319776_133360216	HPRT1	HGPRT|HPRT	hypoxanthine phosphoribosyltransferase 1 (Lesch-Nyhan syndrome)
hSQ021336	3251	CTGTTTGTTCACATTATGAGTCTACAGACTATCAGTTCCTTTTGGGCGGATTGTTGTTTAATTTGTAGAT	PC Details: [Mismatch Controls; Distributed]	.	HPRT1	HGPRT|HPRT	hypoxanthine phosphoribosyltransferase 1 (Lesch-Nyhan syndrome)
hSQ021307	3251	CTGTTTATTCGCACTATGGACCTATAGACTGTCAGTTCCTCTCGGGCGGACTGTCGTTTAGTCTGTAAAT	PC Details: [Mismatch Controls; Distributed]	.	HPRT1	HGPRT|HPRT	hypoxanthine phosphoribosyltransferase 1 (Lesch-Nyhan syndrome)
hSQ019368	3251	CTATTTATTTACACTACGGGTCTGTGGACTATTAGTTCCTTCTGGGCGGATTGTTACTTGACCTGTAGAT	PC Details: [Mismatch Controls; Distributed]	.	HPRT1	HGPRT|HPRT	hypoxanthine phosphoribosyltransferase 1 (Lesch-Nyhan syndrome)
hSQ012543	6908	CACTGAGAACACCGCGCGGCGTGACTGTGAGTTGCTCATACCGTGCTGCTATCTGGGCAGCGCTGCCCAT	PC Details: [Mismatch Controls; Distributed]	chr6_+_170781090_170799578	TBP	GTF2D|GTF2D1|MGC117320|MGC126054|MGC126055|SCA17|TFIID	TATA box binding protein
hSQ012536	6908	CACTGAGAACACCGCACAGCGTGACTGTGAGTTGCTCATACCGTGCTGCTATCTGGGCAGCACTGCCCAT	PC Details: [Mismatch Controls; Distributed]	chr6_+_170781090_170799578	TBP	GTF2D|GTF2D1|MGC117320|MGC126054|MGC126055|SCA17|TFIID	TATA box binding protein
hSQ012535	6908	CACTGAGAACACCGCACAGCGTGACTGTGAGTTGCTCATACCGTGCTGCCATCTGGGCAGCGTTGCCCAT	PC Details: [Mismatch Controls; Distributed]	chr6_+_170781090_170799578	TBP	GTF2D|GTF2D1|MGC117320|MGC126054|MGC126055|SCA17|TFIID	TATA box binding protein
hSQ012592	6908	CACTGGGAACACCGCGCAACGTGACTATAGGTTACTCATACCGTGTTATTATCTGGGCAGCGCTGCCCAT	PC Details: [Mismatch Controls; Distributed]	.	TBP	GTF2D|GTF2D1|MGC117320|MGC126054|MGC126055|SCA17|TFIID	TATA box binding protein
hSQ012555	6908	CACTGAGGATGCCGTGCAGCGTGACTGTGAGTTGTTCATACTACGCTGTTATCTGGACAGTGCTGCCTAT	PC Details: [Mismatch Controls; Distributed]	.	TBP	GTF2D|GTF2D1|MGC117320|MGC126054|MGC126055|SCA17|TFIID	TATA box binding protein
hSQ018263	6908	CGCTGAGAGCGCCGCGCGGCGTAACTGTAAATTGTTCGTGTCGTACTGCTATTTGGGCAGTGCTGCCCAC	PC Details: [Mismatch Controls; Distributed]	.	TBP	GTF2D|GTF2D1|MGC117320|MGC126054|MGC126055|SCA17|TFIID	TATA box binding protein
hSQ040254	3145	TGCCCAACATGAAGATGGCCCTGAGGATGACCCACAGTTGGTAGGCATCACTGCTCGTAACATTCCACGA	PC Details: [Mismatch Controls; Distributed]	chr11_+_118443700_118469468	HMBS	PBG-D|PBGD|UPS	hydroxymethylbilane synthase
hSQ040265	3145	TGCCCAGCATGAAGATGACCCTGAGGATGACCCACAGTTGGTAGGCACCACTGCTCGTAACATTCCACGA	PC Details: [Mismatch Controls; Distributed]	chr11_+_118443700_118469468	HMBS	PBG-D|PBGD|UPS	hydroxymethylbilane synthase
hSQ040270	3145	TGCCCAGCATGAAGATGGCCCTGGGGATGACCCACAGTTGGTAGGCATCACTGCTCGTAACATTCTATGA	PC Details: [Mismatch Controls; Distributed]	chr11_+_118443700_118469468	HMBS	PBG-D|PBGD|UPS	hydroxymethylbilane synthase
hSQ040574	3145	TGCTCAGTATGAAGATGGCCCTGAAGATGACCCACAGTTGGTAGGCATTATTGCTCGTAACGTTTCGTGA	PC Details: [Mismatch Controls; Distributed]	chr11_+_118443700_118469468	HMBS	PBG-D|PBGD|UPS	hydroxymethylbilane synthase
hSQ040570	3145	TGCTCAGCACGGAGATAGCCCCGAAGATGACCCATAGTCGGTAGGCGTCACTGTTCGTAACATCTCACGA	PC Details: [Mismatch Controls; Distributed]	.	HMBS	PBG-D|PBGD|UPS	hydroxymethylbilane synthase
hSQ021989	6389	CTTTACACTGAGACCTATGCTGGAAAGACTGCTCTGGATCGGGAATTCGCGGTAGGCATAGCCCCAGGGG	PC Details: [Mismatch Controls; Anchored]	.	SDHA	FP|SDH2|SDHF	succinate dehydrogenase complex, subunit A, flavoprotein (Fp)
hSQ031191	567	GGGTGGGATCGAGACATGTAAGCAGCATCATGGAGGTTTGAAGATGCCGCATTTGGATTGGATGAACCTC	PC Details: [Mismatch Controls; Anchored]	chr15_+_42791008_42797634	B2M	-	beta-2-microglobulin
hSQ028904	567	GGACAGCACGGAGACATGTAAGCAGCATCATGGAGGTTTGAAGATGCCGCATTTGGATTTAGGGGACCTA	PC Details: [Mismatch Controls; Anchored]	.	B2M	-	beta-2-microglobulin
hSQ031865	567	GGTTTAACCCAATTCATGTAAGCAGCATCATGGAGGTTTGAAGATGCCGCATTTGGTCCGAGCAGGTATC	PC Details: [Mismatch Controls; Anchored]	.	B2M	-	beta-2-microglobulin
hSQ005865	567	AGACCAATCCGGAATACGTAAGCAGCATCATGGAGGTTTGAAGATGCCGCATCCGGACCGAGTAGGTCTT	PC Details: [Mismatch Controls; Anchored]	.	B2M	-	beta-2-microglobulin
hSQ034960	567	TAAGCAAGCCATGGTTTATGAGTGGCATCATGGAGGTTTGAAGATGCCAGGCCCACTCCAAGCAGGAGCG	PC Details: [Mismatch Controls; Anchored]	.	B2M	-	beta-2-microglobulin
hSQ024142	567	GAGCAAGACTAAAGGAAATCAGTTATGTCATGGAGGTTTGAAGACTTTATGCCCAACGTGGGCGGCGCAT	PC Details: [Mismatch Controls; Anchored]	.	B2M	-	beta-2-microglobulin
hSQ031393	567	GGTCAGAGAGCAAGTGAAGGAATGGTAGTTCGGAGGTTCGGGAACATTGTAACTGAGTCCCAAGACTTTT	PC Details: [Mismatch Controls; Anchored]	.	B2M	-	beta-2-microglobulin
hSQ021311	3251	CTGTTTATTTGCACTATGAACCTATAGACTATCAGTTCCCTTTGGGCGGATTGTTGTTTAACTTGTGAAT	PC Details: [Mismatch Controls; Distributed]	chrX_+_133319776_133360216	HPRT1	HGPRT|HPRT	hypoxanthine phosphoribosyltransferase 1 (Lesch-Nyhan syndrome)
hSQ021316	3251	CTGTTTATTTGCATTATAAGCCTATAGACTATCAGTTCCCTTTGGGCGGATTGTTGTTTAACTTGTAGAT	PC Details: [Mismatch Controls; Distributed]	chrX_+_133319776_133360216	HPRT1	HGPRT|HPRT	hypoxanthine phosphoribosyltransferase 1 (Lesch-Nyhan syndrome)
hSQ021308	3251	CTGTTTATTTGCACCATGAGCCTATAGACTATCAGTCCCCTTTGGGCGGATTGTTGTTTAACTCGCAGAC	PC Details: [Mismatch Controls; Distributed]	chrX_+_133319776_133360216	HPRT1	HGPRT|HPRT	hypoxanthine phosphoribosyltransferase 1 (Lesch-Nyhan syndrome)
hSQ043056	3251	TTATTCGTTTGTACTACGAGCCTATAAACTATCAACTTCCTCTGGGCGGATTGTTGTTTAACTTGTAAAC	PC Details: [Mismatch Controls; Distributed]	.	HPRT1	HGPRT|HPRT	hypoxanthine phosphoribosyltransferase 1 (Lesch-Nyhan syndrome)
hSQ020733	3251	CTGCTTGCTTGTACTGCGAGCCTATAGACTATCAGTTCCCTTTGGGTAGATCGTCGTTCGACCCGTGAAT	PC Details: [Mismatch Controls; Distributed]	.	HPRT1	HGPRT|HPRT	hypoxanthine phosphoribosyltransferase 1 (Lesch-Nyhan syndrome)
hSQ038093	3251	TCGCCCGCTTACATTACGAGCCTATGGACCACCAACTCCTCCTGAATGGATTGCTGTCCAGTTCGTGGAC	PC Details: [Mismatch Controls; Distributed]	.	HPRT1	HGPRT|HPRT	hypoxanthine phosphoribosyltransferase 1 (Lesch-Nyhan syndrome)
hSQ012537	6908	CACTGAGAACACCGCGCAGCGTGACTGCGAGTTGCTCATACCGCGCTGCTATCTGGGCAGCGCTGCCCAT	PC Details: [Mismatch Controls; Distributed]	chr6_+_170781090_170799578	TBP	GTF2D|GTF2D1|MGC117320|MGC126054|MGC126055|SCA17|TFIID	TATA box binding protein
hSQ012542	6908	CACTGAGAACACCGCGCAGTGTGACTGTGAGTTGCTCATGCCGTGCTGCTATCTGGGCAACGCTGCCCAT	PC Details: [Mismatch Controls; Distributed]	chr6_+_170781090_170799578	TBP	GTF2D|GTF2D1|MGC117320|MGC126054|MGC126055|SCA17|TFIID	TATA box binding protein
hSQ012545	6908	CACTGAGAACATCGCGCAGCGCGACTGTGAGTTGCTTATACCGTGCTGCTATTTGGGCGGCGCCGCCCAT	PC Details: [Mismatch Controls; Distributed]	.	TBP	GTF2D|GTF2D1|MGC117320|MGC126054|MGC126055|SCA17|TFIID	TATA box binding protein
hSQ014335	6908	CATTGAAGGCGCCGCGCAGCGTGACTGTAAACTACTCATATCGTGCCGCTATCTGGGCGGCGCTGCCCAT	PC Details: [Mismatch Controls; Distributed]	.	TBP	GTF2D|GTF2D1|MGC117320|MGC126054|MGC126055|SCA17|TFIID	TATA box binding protein
hSQ012553	6908	CACTGAGGACACCGCGCGACATAACTGCGAGTTGCTCATATCGTGCTGCTGCCCAGGTAGTGCTGCCTGT	PC Details: [Mismatch Controls; Distributed]	.	TBP	GTF2D|GTF2D1|MGC117320|MGC126054|MGC126055|SCA17|TFIID	TATA box binding protein
hSQ012295	6908	CACCGGAGACGTCACGTAATACGGCCATAGATCGCTCGCGCCGTGTCGTCATCCGGGCGGCGTCGCCCAT	PC Details: [Mismatch Controls; Distributed]	.	TBP	GTF2D|GTF2D1|MGC117320|MGC126054|MGC126055|SCA17|TFIID	TATA box binding protein
hSQ040267	3145	TGCCCAGCATGAAGATGGCCCTGAGGATGACCCACAGTTGATAGGCATCACTGCTCGTAACATTCCACGG	PC Details: [Mismatch Controls; Distributed]	chr11_+_118443700_118469468	HMBS	PBG-D|PBGD|UPS	hydroxymethylbilane synthase
hSQ041943	3145	TGTCCAGCATGAAGATGGCCCTGAGGATGACCCATAGTTGGTAGGCATCACTGCTCGTAACATCCCACGA	PC Details: [Mismatch Controls; Distributed]	chr11_+_118443700_118469468	HMBS	PBG-D|PBGD|UPS	hydroxymethylbilane synthase
hSQ042009	3145	TGTCTAGCATGAAGATGGCCCTGAGGATGACCCATAGCTGGTAGGCATCACTGCTTGTAGCATTCCACGA	PC Details: [Mismatch Controls; Distributed]	chr11_+_118443700_118469468	HMBS	PBG-D|PBGD|UPS	hydroxymethylbilane synthase
hSQ018151	3145	CGCCCGGCATGAAGATGGCTCTGGGGATGACCCACAATCGGTAAGTATTACTACTCGTAGCATTCCACAA	PC Details: [Mismatch Controls; Distributed]	.	HMBS	PBG-D|PBGD|UPS	hydroxymethylbilane synthase
hSQ018830	6389	CGTTCCACGCATACCAGAGATTAGTAAGCAGCTCTGGAACACGAGTTGGCGTCTGGTAGTGTACGTAACT	PC Details: [Mismatch Controls; Anchored]	.	SDHA	FP|SDH2|SDHF	succinate dehydrogenase complex, subunit A, flavoprotein (Fp)
hSQ002554	567	AAGTGGGATCGAGACATGTAAGCAGCATCATGGAGGTTTGAAGATGCCGCATTTGGATTGGATGAACCTC	PC Details: [Mismatch Controls; Anchored]	chr15_+_42791008_42797634	B2M	-	beta-2-microglobulin
hSQ008746	567	ATACGACATCGAGACATGTAAGCAGCATCATGGAGGTTTGAAGATGCCGCATTTGGATTGGATAAACCTT	PC Details: [Mismatch Controls; Anchored]	chr15_+_42791008_42797634	B2M	-	beta-2-microglobulin
hSQ005846	567	AGACAGTGCTAGGGCATGTAAGCAGCATCATGGAGGTTTGAAGATGCCGCATTTGGGCTTCGCGAGCCGC	PC Details: [Mismatch Controls; Anchored]	.	B2M	-	beta-2-microglobulin
hSQ030706	567	GGGCAGCACTGGGGTTCGTAAGCAGCATCATGGAGGTTTGAAGATGCCGCATCTCGGACAGCCAGGTATG	PC Details: [Mismatch Controls; Anchored]	.	B2M	-	beta-2-microglobulin
hSQ042923	567	TTATAAAAATAGAATACGTCTGCAGCATCATGGAGGTTTGAAGATGCCGAGCGCAACCTGAAGGGCTTTG	PC Details: [Mismatch Controls; Anchored]	.	B2M	-	beta-2-microglobulin
hSQ030800	567	GGGCGAGGCTGAAGCACATGGTGGTTGCCATGGAGGTTTGAAAGAGTGACGTCCTAGCCAAGCGAGGCTA	PC Details: [Mismatch Controls; Anchored]	.	B2M	-	beta-2-microglobulin
hSQ031124	567	GGGTATTGCTAGGCAGCACTGTCAATCCCGCGGAGGTTTGGTATCGCTGTCGCAACTTCCAACAGGCCTC	PC Details: [Mismatch Controls; Anchored]	.	B2M	-	beta-2-microglobulin
hSQ021315	3251	CTGTTTATTTGCACTGTGAGCCTATAGACTATCAGTTCCCTTTGGGCGGATTGTTGTTTAACTTGTAAAT	PC Details: [Mismatch Controls; Distributed]	chrX_+_133319776_133360216	HPRT1	HGPRT|HPRT	hypoxanthine phosphoribosyltransferase 1 (Lesch-Nyhan syndrome)
hSQ019370	3251	CTATTTATTTGCACTATGAGCCTATAGACTATCAGTTCCCTCTGGGCGGGTTGTTGTTTAACTTGTAAAT	PC Details: [Mismatch Controls; Distributed]	chrX_+_133319776_133360216	HPRT1	HGPRT|HPRT	hypoxanthine phosphoribosyltransferase 1 (Lesch-Nyhan syndrome)
hSQ021310	3251	CTGTTTATTTGCACTATAAGCTCGTAGACTACCAGTTCCCTTCGGGCGGATTGTTGTTTAACTTGTAAAT	PC Details: [Mismatch Controls; Distributed]	.	HPRT1	HGPRT|HPRT	hypoxanthine phosphoribosyltransferase 1 (Lesch-Nyhan syndrome)
hSQ021317	3251	CTGTTTATTTGCGCCATGAACCTATAGACTATCAGTTCTCTTTGGGCGGACTGTTGTTCGACCTGTGAAT	PC Details: [Mismatch Controls; Distributed]	.	HPRT1	HGPRT|HPRT	hypoxanthine phosphoribosyltransferase 1 (Lesch-Nyhan syndrome)
hSQ021304	3251	CTGTTTACTCACACTATGAGCCCGTAGACTATCAGTTCCCTCTAGATGGACTGTTATTTAACCCGTGAGT	PC Details: [Mismatch Controls; Distributed]	.	HPRT1	HGPRT|HPRT	hypoxanthine phosphoribosyltransferase 1 (Lesch-Nyhan syndrome)
hSQ038219	3251	TCGTCCACTCGTATCATGAACTCGTAGGCTGTCAGTCTCCTTTAAGTGGGTCGTCATCTAACCTATGGAC	PC Details: [Mismatch Controls; Distributed]	.	HPRT1	HGPRT|HPRT	hypoxanthine phosphoribosyltransferase 1 (Lesch-Nyhan syndrome)
hSQ012540	6908	CACTGAGAACACCGCGCAGCGTGACTGTGAGTTGCTCATACCGTGCTGCTATCTGGGCAGCACTGCCCAT	PC Details: [Mismatch Controls; Distributed]	chr6_+_170781090_170799578	TBP	GTF2D|GTF2D1|MGC117320|MGC126054|MGC126055|SCA17|TFIID	TATA box binding protein
hSQ035552	6908	TACTGAGAACACCGCGCAGCGCGACTGTGAGCTGCTCATACCGTGCTGCTATCTGGGCAGCGCTGCCCAT	PC Details: [Mismatch Controls; Distributed]	chr6_+_170781090_170799578	TBP	GTF2D|GTF2D1|MGC117320|MGC126054|MGC126055|SCA17|TFIID	TATA box binding protein
hSQ012544	6908	CACTGAGAACACTGCGTGGCGTGACTGTGAGTTGCTCATACTGTGCTGCTATCTGGGCAGCGCTGCTTAT	PC Details: [Mismatch Controls; Distributed]	chr6_+_170781090_170799578	TBP	GTF2D|GTF2D1|MGC117320|MGC126054|MGC126055|SCA17|TFIID	TATA box binding protein
hSQ012534	6908	CACTGAGAACACCACGCAGCGTGACTGTGGGTTGCCCATACCGTGCTGCTGCCTGGGCAGCGCTACTCGC	PC Details: [Mismatch Controls; Distributed]	.	TBP	GTF2D|GTF2D1|MGC117320|MGC126054|MGC126055|SCA17|TFIID	TATA box binding protein
hSQ012554	6908	CACTGAGGACACCGCGCGGCGTGACTGTAAATTACTCGTACCGTATTATTACCTGGGCAGCATTACCCGT	PC Details: [Mismatch Controls; Distributed]	.	TBP	GTF2D|GTF2D1|MGC117320|MGC126054|MGC126055|SCA17|TFIID	TATA box binding protein
hSQ035510	6908	TACTAAAAACGCCGTGTAGTGCAGCTGTGAGCCGTTCGTGCCACGTTGCTGCCTAGGCAATATCGCTTGC	PC Details: [Mismatch Controls; Distributed]	.	TBP	GTF2D|GTF2D1|MGC117320|MGC126054|MGC126055|SCA17|TFIID	TATA box binding protein
hSQ040274	3145	TGCCCAGTATGAAGATGGCCCTGAGGATGACCCACAGTTGGTAGGCATCACTGCTCGTAACATTCCACGA	PC Details: [Mismatch Controls; Distributed]	chr11_+_118443700_118469468	HMBS	PBG-D|PBGD|UPS	hydroxymethylbilane synthase
hSQ042349	3145	TGTTCAGCATGAAGATGGCCCTGAGGATGACCCACAGTCGGTAGGCATCACTGCTCGTAACATTCCACGA	PC Details: [Mismatch Controls; Distributed]	chr11_+_118443700_118469468	HMBS	PBG-D|PBGD|UPS	hydroxymethylbilane synthase
hSQ040271	3145	TGCCCAGCATGAGGGTGACCCTGAGGATGACCCACAGTTGGTAGGCATCACTGTCCGTAACGTTCCACGA	PC Details: [Mismatch Controls; Distributed]	.	HMBS	PBG-D|PBGD|UPS	hydroxymethylbilane synthase
hSQ040363	3145	TGCCTAGCATGAGGATAACCTTGAGGATGATCCACAGTTGGTAGGTATCGCTACTCGTAACATTCCACGA	PC Details: [Mismatch Controls; Distributed]	.	HMBS	PBG-D|PBGD|UPS	hydroxymethylbilane synthase
hSQ012308	3145	CACCTAGTATAGAGGTGACTTTGAAGGTAACCTGCGGCTAATAGATACCATTGTTTATAATATTTCATAA	PC Details: [Mismatch Controls; Distributed]	.	HMBS	PBG-D|PBGD|UPS	hydroxymethylbilane synthase
hSQ038013	6389	TCCTTTGTGGACGTTGGCACTGGGAAGGTCACTCTGGAACATAGACCCGTAATCGACAAAACTTTGAACG	PC Details: [Mismatch Controls; Distributed]	chr5_-_1625375_1627469	SDHA	FP|SDH2|SDHF	succinate dehydrogenase complex, subunit A, flavoprotein (Fp)
hSQ038009	6389	TCCTTTGTGGACATTGGTACTGGGAAGGTCACTCTGGAATATAGACCCGTAATCGACAAAACTTTGAACG	PC Details: [Mismatch Controls; Distributed]	chr5_+_271400_309794	SDHA	FP|SDH2|SDHF	succinate dehydrogenase complex, subunit A, flavoprotein (Fp)
hSQ038006	6389	TCCTTTGCGGACGTTGGCACTGGGAAGGTCACTTTGAAATACAGACCCGCAATCGACAAAGCTTTGAACG	PC Details: [Mismatch Controls; Distributed]	.	SDHA	FP|SDH2|SDHF	succinate dehydrogenase complex, subunit A, flavoprotein (Fp)
hSQ038007	6389	TCCTTTGTAGACGTTGGCATTGAGAAGGTCGCTCCAGAACATAGATCCGTAATCGGCAAAACTTTGAACG	PC Details: [Mismatch Controls; Distributed]	.	SDHA	FP|SDH2|SDHF	succinate dehydrogenase complex, subunit A, flavoprotein (Fp)
hSQ043521	6389	TTCCTCGTGGGCGTTGGCACTAGGAAGGTTACTCTGGAATGCAGATTCGTAATCGACAAAATCTTGAACG	PC Details: [Mismatch Controls; Distributed]	.	SDHA	FP|SDH2|SDHF	succinate dehydrogenase complex, subunit A, flavoprotein (Fp)
hSQ017058	6389	CCTCCTGTGGACACCAACACTAAGGGGGCCACCTTGAAGCACGAACTCGTGACCAACGAAGTTTTGAGCG	PC Details: [Mismatch Controls; Distributed]	.	SDHA	FP|SDH2|SDHF	succinate dehydrogenase complex, subunit A, flavoprotein (Fp)
hSQ002553	567	AAGTGGGATCGAGACATGTAAGCAGCATCATGGAGGTTTGAAAATGCCGCATTTGGATTGGATGAATTCC	PC Details: [Mismatch Controls; Distributed]	chr15_+_42791008_42797634	B2M	-	beta-2-microglobulin
hSQ002107	567	AAGCGGGATCGAGACATGTAAGCAGCATCATGGAGGTTTGAAGATGCCGCATCTGGATTGGATGAATTCC	PC Details: [Mismatch Controls; Distributed]	chr15_+_42791008_42797634	B2M	-	beta-2-microglobulin
hSQ002519	567	AAGTGAGATCGAGACATGTAAACAGCATCACGGAGGTTTGAAGATGCCGCATTTGGACTAAATGAATTCC	PC Details: [Mismatch Controls; Distributed]	.	B2M	-	beta-2-microglobulin
hSQ002551	567	AAGTGGGATCGAGACATGTAAGCAGCATCACGGGAATCTGGAGATGTTGCATTCGGATTGGATGAATTCC	PC Details: [Mismatch Controls; Distributed]	.	B2M	-	beta-2-microglobulin
hSQ031196	567	GGGTGGGGTCAAGACATGTAAGCAACATCATGGAGGTTTGAAGGTATCGCGTTTAGATTGGATGAATCTC	PC Details: [Mismatch Controls; Distributed]	.	B2M	-	beta-2-microglobulin
hSQ000348	567	AAACAAAACCGGAACATATGGATAGCACCGTGAAAGCTTGAAAATGCTGTGTCTAGACTGGGTGGGCTCT	PC Details: [Mismatch Controls; Distributed]	.	B2M	-	beta-2-microglobulin
hSQ017430	310	CCTGGCTGCCTGATTAATGTCATACCCAGGCTATCCCCCAACAGGCTACCCACCTTTCCCTGGATATCCT	PC Details: [Exons with corresponding junctional probes]	chr10_-_74805208_74843817	ANXA7	ANX7|SNX	annexin A7
hSQ019529	310	CTCAGGTCACTCAAGGAACTATCCGACCAGCTGCCAACTTCGATGCTATAAGAGATGCAGAAATTCTTCG	PC Details: [Exons with corresponding junctional probes]	chr10_-_74805208_74843817	ANXA7	ANX7|SNX	annexin A7
hSQ040572	310	TGCTCAGCGTCTCTATCAAGCTGGTGAGGGGAGACTAGGGACCGATGAATCTTGCTTTAACATGATCCTT	PC Details: [Exons with corresponding junctional probes]	chr10_-_74805208_74843817	ANXA7	ANX7|SNX	annexin A7
hSQ013951	310	CATCCTCTTCAAGCTAATGTCATACCCAGGCTATCCCCCAACAGGCTACCCACCTTTCCCTGGATATCCT	PC Details: [Exons with corresponding junctional probes]	chr10_-_74805208_74843817	ANXA7	ANX7|SNX	annexin A7
hSQ038459	310	TCTCATCAATACAGATTCTTTTTCTTCCTATCCTGTTTTCTCTCCTGTTTCTTTGGATTATAGCAGTGAA	PC Details: [Exons with corresponding junctional probes]	chr10_-_74805208_74843817	ANXA7	ANX7|SNX	annexin A7
hSQ007185	310	AGGAAATCCGAGAAATTGTCAGATGTTATCAGTCAGAATTTGGACGAGACCTTGAAAAGGACATTAGGTC	PC Details: [Exons with corresponding junctional probes]	chr10_-_74805208_74843817	ANXA7	ANX7|SNX	annexin A7
hSQ009139	4952	ATCAGAGAGCGCCGCTTTGAAATCCCTGATGAGGAACACTGTTTGAAGTTCCTCTCAGCTGTCCTTGCTG	PC Details: [Exons with corresponding junctional probes]	chrX_+_128399782_128452067	OCRL	INPP5F|LOCR|NPHL2|OCRL1	oculocerebrorenal syndrome of Lowe
hSQ044598	4952	TTGTTGGAACTTGGAATGTGAATGGCCAGTCTCCAGATAGCGGGTTAGAACCTTGGCTGAACTGTGATCC	PC Details: [Exons with corresponding junctional probes]	chrX_+_128399782_128452067	OCRL	INPP5F|LOCR|NPHL2|OCRL1	oculocerebrorenal syndrome of Lowe
hSQ014118	4952	CATGCCTGATGCCAATGAGGTGAAAAGTCTTATTAATAAGAAAGACCTTCAGAGACTCTTGAAATTCGAC	PC Details: [Exons with corresponding junctional probes]	chrX_+_128399782_128452067	OCRL	INPP5F|LOCR|NPHL2|OCRL1	oculocerebrorenal syndrome of Lowe
hSQ039132	4952	TGAAAATGTGAAGTTTCGGCAACTACAAAAGGAGAAGTTCCAGATCAGCAACAATGGACAGGTTCCCTGC	PC Details: [Exons with corresponding junctional probes]	chrX_+_128399782_128452067	OCRL	INPP5F|LOCR|NPHL2|OCRL1	oculocerebrorenal syndrome of Lowe
hSQ006658	4952	AGCCAGTCATCTGTTACGAGCTGTATCAGCGATGTCTTGACTCTGCTTATGATCCCCGGATCTGCCGACA	PC Details: [Exons with corresponding junctional probes]	chrX_+_128399782_128452067	OCRL	INPP5F|LOCR|NPHL2|OCRL1	oculocerebrorenal syndrome of Lowe
hSQ040264	3145	TGCCCAGCATAAAGACGATCCTGAGGGCGATCCGTAGTTGGTAAGTATCACTGTCCGTAATATTTCACGA	PC Details: [Mismatch Controls; Distributed]	.	HMBS	PBG-D|PBGD|UPS	hydroxymethylbilane synthase
hSQ038016	6389	TCCTTTGTGGACGTTGGCACTGGGAAGGTCACTCTGGAATATAGACCCGTAATCGACAAAACTTCGAACG	PC Details: [Mismatch Controls; Distributed]	chr5_-_1625375_1627469	SDHA	FP|SDH2|SDHF	succinate dehydrogenase complex, subunit A, flavoprotein (Fp)
hSQ038018	6389	TCCTTTGTGGACGTTGGTACTGGGAAGGTCACTCTGGAATATAGACCCGTAATCGACAAAACTTTAAACG	PC Details: [Mismatch Controls; Distributed]	chr5_+_271400_309794	SDHA	FP|SDH2|SDHF	succinate dehydrogenase complex, subunit A, flavoprotein (Fp)
hSQ038012	6389	TCCTTTGTGGACGTTGGCACTGGGAAGGTCACTCCGGAATATAGACCCATAATCGACAAAACTTTAAACG	PC Details: [Mismatch Controls; Distributed]	chr3_-_197178565_197178605	SDHA	FP|SDH2|SDHF	succinate dehydrogenase complex, subunit A, flavoprotein (Fp)
hSQ037857	6389	TCCTCTGTGGACATTGGCACTGGGAAGGTCACTCTGGGATGTGGACCCGTGATCGACAAAGCTTCGAATG	PC Details: [Mismatch Controls; Distributed]	.	SDHA	FP|SDH2|SDHF	succinate dehydrogenase complex, subunit A, flavoprotein (Fp)
hSQ037650	6389	TCCCTCGCGGACGCTAGCACTGGAGAGGTCACCCTGGAGTATAGACCCGCAATCGACAAAATTTTGAATG	PC Details: [Mismatch Controls; Distributed]	.	SDHA	FP|SDH2|SDHF	succinate dehydrogenase complex, subunit A, flavoprotein (Fp)
hSQ037972	6389	TCCTTCGCGGACGCCGGCGCTAGGAAGGTCACTCTGAAATATAAACCCACAATTAGTAAAATTTTGAACG	PC Details: [Mismatch Controls; Distributed]	.	SDHA	FP|SDH2|SDHF	succinate dehydrogenase complex, subunit A, flavoprotein (Fp)
hSQ002552	567	AAGTGGGATCGAGACATGTAAGCAGCATCATGGAAGTTTGAAGATGCCGCATTTGGATTGGATGAATTCC	PC Details: [Mismatch Controls; Distributed]	chr15_+_42791008_42797634	B2M	-	beta-2-microglobulin
hSQ002549	567	AAGTGGGATCGAGACACGTAAGCAGCATCATGGAGGTTTGAAGATGCCGCATTTGGATTGGATGAACTCC	PC Details: [Mismatch Controls; Distributed]	chr15_+_42791008_42797634	B2M	-	beta-2-microglobulin
hSQ002562	567	AAGTGGGATTGAGACATGTAAGCAGCATCATAGGGGTTTGAAGATGCCGCATTTGGATTGGATGAATTCC	PC Details: [Mismatch Controls; Distributed]	chr15_+_42791008_42797634	B2M	-	beta-2-microglobulin
hSQ002559	567	AAGTGGGATCGAGATGCGTGAGTAACACCATGGAGGCTTGAAGATGCCGCATTTGGATTGGATGAACTCC	PC Details: [Mismatch Controls; Distributed]	.	B2M	-	beta-2-microglobulin
hSQ002564	567	AAGTGGGGCCGAGACGTGTGAGCGACATCATGGAGATTTGAGGATGTCGCATTTGGATTAGACGAATTCT	PC Details: [Mismatch Controls; Distributed]	.	B2M	-	beta-2-microglobulin
hSQ002541	567	AAGTGGAATTGGGATATGCAGGTAGCATCATGGAGGTCCGAAAACGCTGCATTCGGATCGGATAAATTCC	PC Details: [Mismatch Controls; Distributed]	.	B2M	-	beta-2-microglobulin
hSQ045056	310	TTTGAGACCGCGAACCCGGTCTCCCGCAAGATGGAGCCGGGTTGGGCTGTGACGCTGCTGCTGGGGTCAG	PC Details: [Exons with corresponding junctional probes]	chr10_-_74805208_74843817	ANXA7	ANX7|SNX	annexin A7
hSQ001627	310	AACTGGTGGCTTTCCTGGAGGACAGATGCCTTCTCAGTATCCTGGAGGACAACCTACTTACCCTAGTCAG	PC Details: [Exons with corresponding junctional probes]	chr10_-_74805208_74843817	ANXA7	ANX7|SNX	annexin A7
hSQ007185	310	AGGAAATCCGAGAAATTGTCAGATGTTATCAGTCAGAATTTGGACGAGACCTTGAAAAGGACATTAGGTC	PC Details: [Exons with corresponding junctional probes]	chr10_-_74805208_74843817	ANXA7	ANX7|SNX	annexin A7
hSQ009310	310	ATCCCGCTTACGAACCCGGTCTCCCGCAAGATGGAGCCGGGTTGGGCTGTGACGCTGCTGCTGGGGTCAG	PC Details: [Exons with corresponding junctional probes]	chr10_-_74805208_74843817	ANXA7	ANX7|SNX	annexin A7
hSQ012410	310	CACGGGTGGCTTTCCTGGAGGACAGATGCCTTCTCAGTATCCTGGAGGACAACCTACTTACCCTAGTCAG	PC Details: [Exons with corresponding junctional probes]	chr10_-_74805208_74843817	ANXA7	ANX7|SNX	annexin A7
hSQ042684	310	TTAATCAAAGATCTCAAATCAGAGTTAAGTGGAAATATGGAAGAACTGATCCTGGCCCTCTTCATGCCTC	PC Details: [Exons with corresponding junctional probes]	chr10_-_74805208_74843817	ANXA7	ANX7|SNX	annexin A7
hSQ027231	310	GCCTTCTTTGCTGAGAGGCTCTACTATGCTATGAAAGGTGCTGGCACAGATGACTCCACCCTGGTCCGGA	PC Details: [Exons with corresponding junctional probes]	chr10_-_74805208_74843817	ANXA7	ANX7|SNX	annexin A7
hSQ021672	4952	CTTCTAACAAGGAGCAGCCCAAAGTGACCAACACCATGCGGAAGCTCTTTGTACCAAATACCCAATCTGG	PC Details: [Exons with corresponding junctional probes]	chrX_+_128399782_128452067	OCRL	INPP5F|LOCR|NPHL2|OCRL1	oculocerebrorenal syndrome of Lowe
hSQ022921	4952	GAAGGAATCAAGATTATAAGGACATTTGTGCGAGAATGAGTTTTGTGGTCCCAAATCAGACCCTCCCGCA	PC Details: [Exons with corresponding junctional probes]	chrX_+_128399782_128452067	OCRL	INPP5F|LOCR|NPHL2|OCRL1	oculocerebrorenal syndrome of Lowe
hSQ033514	4952	GTGGATGAACGAAGGTACCGGAAAGTCTTTGAAGATAGTGTACGCATCATGGACAGAATGGAAAATGACT	PC Details: [Exons with corresponding junctional probes]	chrX_+_128399782_128452067	OCRL	INPP5F|LOCR|NPHL2|OCRL1	oculocerebrorenal syndrome of Lowe
hSQ004607	4952	ACCTGTTCCAGACCCCTGGAATGCAGGAAGAGCTCCAGCAGATCATTGATTGTCTGGATACCAGCATTCC	PC Details: [Exons with corresponding junctional probes]	chrX_+_128399782_128452067	OCRL	INPP5F|LOCR|NPHL2|OCRL1	oculocerebrorenal syndrome of Lowe
hSQ040398	3145	TGCCTGGCATAAAGATGATCCTAGGGGTGACCCATAGTTAGTAGGCACCACTACTCGTAGCATTTCATGA	PC Details: [Mismatch Controls; Distributed]	.	HMBS	PBG-D|PBGD|UPS	hydroxymethylbilane synthase
hSQ018305	3145	CGCTTGGTACGGAGATAACCTCGAAGGCAATTTGTGGTTAATAGGCGTCACTGCCCACAATATTCCGCAA	PC Details: [Mismatch Controls; Distributed]	.	HMBS	PBG-D|PBGD|UPS	hydroxymethylbilane synthase
hSQ038008	6389	TCCTTTGTGGACATTGGCACTGGGAAGGTTACTCTGGAATATAGACCCGTAATCGACAAAACTTTGAACG	PC Details: [Mismatch Controls; Distributed]	chr5_+_271400_309794	SDHA	FP|SDH2|SDHF	succinate dehydrogenase complex, subunit A, flavoprotein (Fp)
hSQ038015	6389	TCCTTTGTGGACGTTGGCACTGGGAAGGTCACTCTGGAATATAGACCCGTAACCGGCAAAACTTCGAACG	PC Details: [Mismatch Controls; Distributed]	.	SDHA	FP|SDH2|SDHF	succinate dehydrogenase complex, subunit A, flavoprotein (Fp)
hSQ038005	6389	TCCTTTGCGGACGTTGGCACTGAGAAGATCACTCTGGAATATAAACCCGTGATCGGCAAAACTTTGAACG	PC Details: [Mismatch Controls; Distributed]	.	SDHA	FP|SDH2|SDHF	succinate dehydrogenase complex, subunit A, flavoprotein (Fp)
hSQ037608	6389	TCCCCTGTGGACGTCAGCACTGGGAAGGTCACCTTGAGGCATAGACCCGTAATTGACAAGACTTTGAACG	PC Details: [Mismatch Controls; Distributed]	.	SDHA	FP|SDH2|SDHF	succinate dehydrogenase complex, subunit A, flavoprotein (Fp)
hSQ043931	6389	TTCTTTGTGGGCGTCAGCACTGAAAAGGTCACTTCGGAGTATAAATCCGTAACCGGCAAGACTTTGGACG	PC Details: [Mismatch Controls; Distributed]	.	SDHA	FP|SDH2|SDHF	succinate dehydrogenase complex, subunit A, flavoprotein (Fp)
hSQ037693	6389	TCCCTTGTAGGTACTGGCATTGGGAGAGTCATCTCGAGACGTAAGTCTATGGTTGGCAAGACCCTGGACG	PC Details: [Mismatch Controls; Distributed]	.	SDHA	FP|SDH2|SDHF	succinate dehydrogenase complex, subunit A, flavoprotein (Fp)
hSQ002560	567	AAGTGGGATCGAGGCATGTAAGCAGCATCATGGAGGTTTGAAGATGCCGCACTTGGATTGGATGAATTCC	PC Details: [Mismatch Controls; Distributed]	chr15_+_42791008_42797634	B2M	-	beta-2-microglobulin
hSQ002550	567	AAGTGGGATCGAGACATATAAGCAGCATCATGGAGGTTTGAAGATGCCGTATCTGGATTGGATGAATTCC	PC Details: [Mismatch Controls; Distributed]	chr15_+_42791008_42797634	B2M	-	beta-2-microglobulin
hSQ002557	567	AAGTGGGATCGAGACATGTAAGTAGCATCATGGGGGTTTGGAGATGCCGCATTTGGATTGAGTGGATTCC	PC Details: [Mismatch Controls; Distributed]	.	B2M	-	beta-2-microglobulin
hSQ002566	567	AAGTGGGGTCAAGACATGCAAGCAGCATTATGGAAGTTTGAAGGTGTCGCGTTTAGGCTGGATGAGTTCC	PC Details: [Mismatch Controls; Distributed]	.	B2M	-	beta-2-microglobulin
hSQ002109	567	AAGCGGGATCGAGGTATGTAAGCAGCGTTATGGAGACTTGAGAATGCCGCACCTGGACCGAATGGATTCC	PC Details: [Mismatch Controls; Distributed]	.	B2M	-	beta-2-microglobulin
hSQ024717	567	GAGTGGAGTCAGAATGCACAAGCGGTGTCGCGGGAGTCTGAGAACGCCACATCTGGGTCGAACGAATCCT	PC Details: [Mismatch Controls; Distributed]	.	B2M	-	beta-2-microglobulin
hSQ030394	310	GGCTTTTCTGGGTATCCACAGCCACCTTCACAGTCTTATGGAGGTGGTCCAGCACAGGTTCCACTACCTG	PC Details: [Exons with corresponding junctional probes]	chr10_-_74805208_74843817	ANXA7	ANX7|SNX	annexin A7
hSQ042684	310	TTAATCAAAGATCTCAAATCAGAGTTAAGTGGAAATATGGAAGAACTGATCCTGGCCCTCTTCATGCCTC	PC Details: [Exons with corresponding junctional probes]	chr10_-_74805208_74843817	ANXA7	ANX7|SNX	annexin A7
hSQ027231	310	GCCTTCTTTGCTGAGAGGCTCTACTATGCTATGAAAGGTGCTGGCACAGATGACTCCACCCTGGTCCGGA	PC Details: [Exons with corresponding junctional probes]	chr10_-_74805208_74843817	ANXA7	ANX7|SNX	annexin A7
hSQ030394	310	GGCTTTTCTGGGTATCCACAGCCACCTTCACAGTCTTATGGAGGTGGTCCAGCACAGGTTCCACTACCTG	PC Details: [Exons with corresponding junctional probes]	chr10_-_74805208_74843817	ANXA7	ANX7|SNX	annexin A7
hSQ011908	310	CAATTGTGGATGTGGTGGCCAACCGTTCCAATGATCAGAGGCAAAAAATTAAAGCAGCATTTAAGACCTC	PC Details: [Exons with corresponding junctional probes]	chr10_-_74805208_74843817	ANXA7	ANX7|SNX	annexin A7
hSQ030146	310	GGCTAATCGAGACTTGTTAAGCAGTGTGAGCCGTGAGTTTTCCGGATATGTAGAAAGTGGTTTGAAGACC	PC Details: [Exons with corresponding junctional probes]	chr10_-_74805208_74843817	ANXA7	ANX7|SNX	annexin A7
hSQ038974	4952	TCTTCTATGAATTTGGACAAGAAAATAAATTCACAAAATCAGCCTACTGGGATTCATCGGGAACCCCCAC	PC Details: [Exons with corresponding junctional probes]	chrX_+_128399782_128452067	OCRL	INPP5F|LOCR|NPHL2|OCRL1	oculocerebrorenal syndrome of Lowe
hSQ031596	4952	GGTGCGCCTTGTTGGGATGATGCTTCTTATATTTGCCAGAAAGGATCAGTGTCGATACATTCGTGATATT	PC Details: [Exons with corresponding junctional probes]	chrX_+_128399782_128452067	OCRL	INPP5F|LOCR|NPHL2|OCRL1	oculocerebrorenal syndrome of Lowe
hSQ029133	4952	GGAGAGGAACAAATGTTAATCAGCTTAATTATCGGAGTCACATGGAACTGAAAACCAGCGACCACAAGCC	PC Details: [Exons with corresponding junctional probes]	chrX_+_128399782_128452067	OCRL	INPP5F|LOCR|NPHL2|OCRL1	oculocerebrorenal syndrome of Lowe
hSQ005602	4952	AGAAATCCCTTCTGCAAATGGTTCCTTTGGATGAAGGTGCCAGTGAGAGACCCCTTCAGGTTCCCAAGGA	PC Details: [Exons with corresponding junctional probes]	chrX_+_128399782_128452067	OCRL	INPP5F|LOCR|NPHL2|OCRL1	oculocerebrorenal syndrome of Lowe
hSQ040571	3145	TGCTCAGCGCGAGGGCGACCCTGAGGGTGGCTCACAGTTGATAGGCACTACTGCTCGTAACGTTCCACAA	PC Details: [Mismatch Controls; Distributed]	.	HMBS	PBG-D|PBGD|UPS	hydroxymethylbilane synthase
hSQ036384	3145	TATTCAACGCAAAAATGACCCCAGAAATAGCTTGCAGCTGGTGGGCGTTGCTGCTTGTAGCGTCCCATGG	PC Details: [Mismatch Controls; Distributed]	.	HMBS	PBG-D|PBGD|UPS	hydroxymethylbilane synthase
hSQ038014	6389	TCCTTTGTGGACGTTGGCACTGGGAAGGTCACTCTGGAATATAGACCCGCAATCGACAAAACTTTGAACG	PC Details: [Mismatch Controls; Distributed]	chr5_+_271400_309794	SDHA	FP|SDH2|SDHF	succinate dehydrogenase complex, subunit A, flavoprotein (Fp)
hSQ038011	6389	TCCTTTGTGGACGTTGGCACTGGGAAGATCACTCTGAAATATAGACCCGTAATCGACAAAATTTTGAACG	PC Details: [Mismatch Controls; Distributed]	.	SDHA	FP|SDH2|SDHF	succinate dehydrogenase complex, subunit A, flavoprotein (Fp)
hSQ037651	6389	TCCCTCGTGGGCGTTGGCACTGGGAAGGTCACTCTGGAATATGGACCCGTAACCGACAAAACTTTGGACG	PC Details: [Mismatch Controls; Distributed]	.	SDHA	FP|SDH2|SDHF	succinate dehydrogenase complex, subunit A, flavoprotein (Fp)
hSQ038010	6389	TCCTTTGTGGACGCTGGCATTGGGGAAGTCATTCTGGAATATAGACCCGTAGTCGACAAAACTTTGGATA	PC Details: [Mismatch Controls; Distributed]	.	SDHA	FP|SDH2|SDHF	succinate dehydrogenase complex, subunit A, flavoprotein (Fp)
hSQ017695	6389	CCTTCTGTGGGCGTCGGCACTGGGAGGATCGTTCTGGAACATAGACCCGCAACCGACAAAACCCTGAACA	PC Details: [Mismatch Controls; Distributed]	.	SDHA	FP|SDH2|SDHF	succinate dehydrogenase complex, subunit A, flavoprotein (Fp)
hSQ017830	6389	CCTTTTATAAGCATCAGTATTAAAGAGACCGCTCCAAAATGTAGACCCGCAATCGACGAGGTCCTGAGCG	PC Details: [Mismatch Controls; Distributed]	.	SDHA	FP|SDH2|SDHF	succinate dehydrogenase complex, subunit A, flavoprotein (Fp)
hSQ002558	567	AAGTGGGATCGAGACATGTAGGCAGCATCATGGAGGTTTGAAGATGCCGCATTTGGATTGGATGAATTCC	PC Details: [Mismatch Controls; Distributed]	chr15_+_42791008_42797634	B2M	-	beta-2-microglobulin
hSQ002556	567	AAGTGGGATCGAGACATGTAAGCGGCATCATGGGGGTTTGAAGATGCCGCGTTTGGATTGGATGAATTCC	PC Details: [Mismatch Controls; Distributed]	chr15_+_42791008_42797634	B2M	-	beta-2-microglobulin
hSQ002108	567	AAGCGGGATCGAGACATGTAAGCAGTATCACGAGGGTTTGAAGATGCCGCACTTGGATTGGATGAATTCC	PC Details: [Mismatch Controls; Distributed]	chr15_+_42791008_42797634	B2M	-	beta-2-microglobulin
hSQ000393	567	AAACAGGATCGAGACATATAAGCAGTATCATGGAGGTTTGAAAGTGCCGCATTTGGATCGGATGAATTCT	PC Details: [Mismatch Controls; Distributed]	.	B2M	-	beta-2-microglobulin
hSQ002563	567	AAGTGGGATTGAGGCGTGTAAGCGGCACCATGAAAATTTGAAGATGCCGCATCTGGACTGGACAAGCCCC	PC Details: [Mismatch Controls; Distributed]	.	B2M	-	beta-2-microglobulin
hSQ023174	567	GAATGGGATCGAGGTATGCAGGTGGCGCCGCGAAGACTTAAAGATACCGCGTCTGAGCCAGACAGGCCCC	PC Details: [Mismatch Controls; Distributed]	.	B2M	-	beta-2-microglobulin
hSQ036995	310	TCAGGAGTCATCTTTTCCCCCTTCTGGTCAGTATCCTTATCCTAGTGGCTTTCCTCCAATGGGAGGAGGT	PC Details: [Exons with corresponding junctional probes]	chr10_-_74805208_74843817	ANXA7	ANX7|SNX	annexin A7
hSQ011908	310	CAATTGTGGATGTGGTGGCCAACCGTTCCAATGATCAGAGGCAAAAAATTAAAGCAGCATTTAAGACCTC	PC Details: [Exons with corresponding junctional probes]	chr10_-_74805208_74843817	ANXA7	ANX7|SNX	annexin A7
hSQ030146	310	GGCTAATCGAGACTTGTTAAGCAGTGTGAGCCGTGAGTTTTCCGGATATGTAGAAAGTGGTTTGAAGACC	PC Details: [Exons with corresponding junctional probes]	chr10_-_74805208_74843817	ANXA7	ANX7|SNX	annexin A7
hSQ036995	310	TCAGGAGTCATCTTTTCCCCCTTCTGGTCAGTATCCTTATCCTAGTGGCTTTCCTCCAATGGGAGGAGGT	PC Details: [Exons with corresponding junctional probes]	chr10_-_74805208_74843817	ANXA7	ANX7|SNX	annexin A7
hSQ019529	310	CTCAGGTCACTCAAGGAACTATCCGACCAGCTGCCAACTTCGATGCTATAAGAGATGCAGAAATTCTTCG	PC Details: [Exons with corresponding junctional probes]	chr10_-_74805208_74843817	ANXA7	ANX7|SNX	annexin A7
hSQ040572	310	TGCTCAGCGTCTCTATCAAGCTGGTGAGGGGAGACTAGGGACCGATGAATCTTGCTTTAACATGATCCTT	PC Details: [Exons with corresponding junctional probes]	chr10_-_74805208_74843817	ANXA7	ANX7|SNX	annexin A7
hSQ014959	4952	CCAGAGCAAAAGGACTCATCTAGCTGGTACCAGAAATTAGACACTAAGGACAAACCTTCTGTTTTTTCAG	PC Details: [Exons with corresponding junctional probes]	chrX_+_128399782_128452067	OCRL	INPP5F|LOCR|NPHL2|OCRL1	oculocerebrorenal syndrome of Lowe
hSQ027230	4952	GCCTTCTTCTACTTTGAATCTGTGAAGGAACAAGAATGGTCCATGGCTGTAGAGAGAGGTTTGCATTCCA	PC Details: [Exons with corresponding junctional probes]	chrX_+_128399782_128452067	OCRL	INPP5F|LOCR|NPHL2|OCRL1	oculocerebrorenal syndrome of Lowe
hSQ018067	4952	CGCACACAGAAAAAAGCTTTTGTTGACTTCAATGAAGGGGAAATCAAGTTCATCCCCACTTATAAGTATG	PC Details: [Exons with corresponding junctional probes]	chrX_+_128399782_128452067	OCRL	INPP5F|LOCR|NPHL2|OCRL1	oculocerebrorenal syndrome of Lowe
hSQ032582	4952	GTCAGCAAAGACTCTGTAACCATCCTGAACTCGGGAGAAGATAAGATTGAAGATATTCTCGTCCTTCACC	PC Details: [Exons with corresponding junctional probes]	chrX_+_128399782_128452067	OCRL	INPP5F|LOCR|NPHL2|OCRL1	oculocerebrorenal syndrome of Lowe
hSQ038974	4952	TCTTCTATGAATTTGGACAAGAAAATAAATTCACAAAATCAGCCTACTGGGATTCATCGGGAACCCCCAC	PC Details: [Exons with corresponding junctional probes]	chrX_+_128399782_128452067	OCRL	INPP5F|LOCR|NPHL2|OCRL1	oculocerebrorenal syndrome of Lowe
hSQ031596	4952	GGTGCGCCTTGTTGGGATGATGCTTCTTATATTTGCCAGAAAGGATCAGTGTCGATACATTCGTGATATT	PC Details: [Exons with corresponding junctional probes]	chrX_+_128399782_128452067	OCRL	INPP5F|LOCR|NPHL2|OCRL1	oculocerebrorenal syndrome of Lowe
hSQ029133	4952	GGAGAGGAACAAATGTTAATCAGCTTAATTATCGGAGTCACATGGAACTGAAAACCAGCGACCACAAGCC	PC Details: [Exons with corresponding junctional probes]	chrX_+_128399782_128452067	OCRL	INPP5F|LOCR|NPHL2|OCRL1	oculocerebrorenal syndrome of Lowe
hSQ005602	4952	AGAAATCCCTTCTGCAAATGGTTCCTTTGGATGAAGGTGCCAGTGAGAGACCCCTTCAGGTTCCCAAGGA	PC Details: [Exons with corresponding junctional probes]	chrX_+_128399782_128452067	OCRL	INPP5F|LOCR|NPHL2|OCRL1	oculocerebrorenal syndrome of Lowe
hSQ018206	351	CGCGCAGGGTCGCGATGCTGCCCGGTTTGGCACTGCTCCTGCTGGCCGCCTGGACGGCTCGGGCGCTGGA	PC Details: [Exons with corresponding junctional probes]	chr21_-_26174732_26464956	APP	AAA|ABETA|ABPP|AD1|APPI|CTFgamma|CVAP|PN2	amyloid beta (A4) precursor protein (peptidase nexin-II, Alzheimer disease)
hSQ009933	351	ATGCAGTGAGAAGAGTACCAACTTGCATGACTACGGCATGTTGCTGCCCTGCGGAATTGACAAGTTCCGA	PC Details: [Exons with corresponding junctional probes]	chr21_-_26174732_26464956	APP	AAA|ABETA|ABPP|AD1|APPI|CTFgamma|CVAP|PN2	amyloid beta (A4) precursor protein (peptidase nexin-II, Alzheimer disease)
hSQ024026	351	GAGAGAATGGGAAGAGGCAGAACGTCAAGCAAAGAACTTGCCTAAAGCTGATAAGAAGGCAGTTATCCAG	PC Details: [Exons with corresponding junctional probes]	chr21_-_26174732_26464956	APP	AAA|ABETA|ABPP|AD1|APPI|CTFgamma|CVAP|PN2	amyloid beta (A4) precursor protein (peptidase nexin-II, Alzheimer disease)
hSQ039185	351	TGAACCAAGGATCAGTTACGGAAACGATGCTCTCATGCCATCTTTGACCGAAACGAAAACCACCGTGGAG	PC Details: [Exons with corresponding junctional probes]	chr21_-_26174732_26464956	APP	AAA|ABETA|ABPP|AD1|APPI|CTFgamma|CVAP|PN2	amyloid beta (A4) precursor protein (peptidase nexin-II, Alzheimer disease)
[truncated: 47,992 more rows]
